# Supplementary material
Source: publisher site journal article supplement (https://www.spandidos-publications.com/3786/downloadSupplementary)
Supplement: Supplementary file 1 [file downloadSupplementary]

## Sheet: gsea_report_for_na_pos_organoid
Table SIII. Signaling pathways that are activated in PCa organoids vs. tissues identified using gene set enrichment analysis (GSEA).
NAME	GS<br> follow link to MSigDB	GS DETAILS	SIZE	ES	NES	NOM p-val	FDR q-val	FWER p-val	RANK AT MAX	LEADING EDGE
KERATINIZATION%REACTOME%R-HSA-6805567.2	KERATINIZATION%REACTOME%R-HSA-6805567.2	Details ...	40	0.872002	5.99406	0	0	0	363	tags=95%, list=12%, signal=106%
EPIDERMIS DEVELOPMENT%GOBP%GO:0008544	EPIDERMIS DEVELOPMENT%GOBP%GO:0008544	Details ...	76	0.724583	5.91543	0	0	0	396	tags=75%, list=13%, signal=84%
CORNIFICATION%GOBP%GO:0070268	CORNIFICATION%GOBP%GO:0070268	Details ...	40	0.871766	5.81304	0	0	0	363	tags=95%, list=12%, signal=106%
EPIDERMAL CELL DIFFERENTIATION%GOBP%GO:0009913	EPIDERMAL CELL DIFFERENTIATION%GOBP%GO:0009913	Details ...	52	0.811132	5.76966	0	0	0	375	tags=83%, list=12%, signal=92%
KERATINOCYTE DIFFERENTIATION%GOBP%GO:0030216	KERATINOCYTE DIFFERENTIATION%GOBP%GO:0030216	Details ...	49	0.827462	5.7542	0	0	0	375	tags=86%, list=12%, signal=96%
KERATINIZATION%GOBP%GO:0031424	KERATINIZATION%GOBP%GO:0031424	Details ...	41	0.86173	5.50901	0	0	0	363	tags=93%, list=12%, signal=104%
SKIN DEVELOPMENT%GOBP%GO:0043588	SKIN DEVELOPMENT%GOBP%GO:0043588	Details ...	66	0.709788	5.30907	0	0	0	375	tags=73%, list=12%, signal=81%
CELL CYCLE, MITOTIC%REACTOME%R-HSA-69278.4	CELL CYCLE, MITOTIC%REACTOME%R-HSA-69278.4	Details ...	62	0.651709	5.25894	0	0	0	761	tags=90%, list=24%, signal=117%
CELL CYCLE%REACTOME DATABASE ID RELEASE 72%1640170	CELL CYCLE%REACTOME DATABASE ID RELEASE 72%1640170	Details ...	70	0.639647	5.01284	0	0	0	779	tags=90%, list=25%, signal=117%
HALLMARK_G2M_CHECKPOINT%MSIGDB_C2%HALLMARK_G2M_CHECKPOINT	HALLMARK_G2M_CHECKPOINT%MSIGDB_C2%HALLMARK_G2M_CHECKPOINT	Details ...	44	0.72045	5.00164	0	0	0	728	tags=93%, list=23%, signal=120%
HALLMARK_E2F_TARGETS%MSIGDB_C2%HALLMARK_E2F_TARGETS	HALLMARK_E2F_TARGETS%MSIGDB_C2%HALLMARK_E2F_TARGETS	Details ...	34	0.749697	4.9037	0	0	0	740	tags=97%, list=24%, signal=126%
MITOTIC CELL CYCLE%GOBP%GO:0000278	MITOTIC CELL CYCLE%GOBP%GO:0000278	Details ...	88	0.527017	4.74171	0	0	0	740	tags=80%, list=24%, signal=101%
MITOTIC CELL CYCLE PROCESS%GOBP%GO:1903047	MITOTIC CELL CYCLE PROCESS%GOBP%GO:1903047	Details ...	81	0.519513	4.70035	0	0	0	761	tags=80%, list=24%, signal=103%
FORMATION OF THE CORNIFIED ENVELOPE%REACTOME%R-HSA-6809371.3	FORMATION OF THE CORNIFIED ENVELOPE%REACTOME%R-HSA-6809371.3	Details ...	24	0.871193	4.62631	0	0	0	363	tags=96%, list=12%, signal=108%
CELL CYCLE CHECKPOINTS%REACTOME%R-HSA-69620.2	CELL CYCLE CHECKPOINTS%REACTOME%R-HSA-69620.2	Details ...	33	0.729207	4.59372	0	0	0	663	tags=94%, list=21%, signal=118%
M PHASE%REACTOME%R-HSA-68886.3	M PHASE%REACTOME%R-HSA-68886.3	Details ...	38	0.629118	4.36083	0	0	0	761	tags=89%, list=24%, signal=117%
MITOTIC METAPHASE AND ANAPHASE%REACTOME%R-HSA-2555396.2	MITOTIC METAPHASE AND ANAPHASE%REACTOME%R-HSA-2555396.2	Details ...	28	0.714781	4.12153	0	0	0	663	tags=93%, list=21%, signal=117%
SISTER CHROMATID SEGREGATION%GOBP%GO:0000819	SISTER CHROMATID SEGREGATION%GOBP%GO:0000819	Details ...	25	0.768435	4.10788	0	0	0	740	tags=100%, list=24%, signal=130%
CELL CYCLE CHECKPOINT%GOBP%GO:0000075	CELL CYCLE CHECKPOINT%GOBP%GO:0000075	Details ...	28	0.703137	4.08796	0	0	0	663	tags=93%, list=21%, signal=117%
MITOTIC ANAPHASE%REACTOME DATABASE ID RELEASE 72%68882	MITOTIC ANAPHASE%REACTOME DATABASE ID RELEASE 72%68882	Details ...	28	0.714781	4.05987	0	0	0	663	tags=93%, list=21%, signal=117%
MITOTIC NUCLEAR DIVISION%GOBP%GO:0140014	MITOTIC NUCLEAR DIVISION%GOBP%GO:0140014		25	0.735011	4.01235	0	0	0	740	tags=96%, list=24%, signal=125%
CHROMOSOME SEGREGATION%GOBP%GO:0007059	CHROMOSOME SEGREGATION%GOBP%GO:0007059		36	0.638785	4.00966	0	0	0	761	tags=94%, list=24%, signal=124%
MITOTIC SISTER CHROMATID SEGREGATION%GOBP%GO:0000070	MITOTIC SISTER CHROMATID SEGREGATION%GOBP%GO:0000070		21	0.767442	3.99788	0	0	0	740	tags=100%, list=24%, signal=130%
MITOTIC PROMETAPHASE%REACTOME DATABASE ID RELEASE 72%68877	MITOTIC PROMETAPHASE%REACTOME DATABASE ID RELEASE 72%68877		26	0.659579	3.76627	0	0	0	663	tags=88%, list=21%, signal=111%
MITOTIC CELL CYCLE CHECKPOINT%GOBP%GO:0007093	MITOTIC CELL CYCLE CHECKPOINT%GOBP%GO:0007093		23	0.685643	3.75206	0	0	0	663	tags=91%, list=21%, signal=115%
REGULATION OF CHROMOSOME SEGREGATION%GOBP%GO:0051983	REGULATION OF CHROMOSOME SEGREGATION%GOBP%GO:0051983		17	0.784839	3.74175	0	0	0	572	tags=94%, list=18%, signal=115%
NUCLEAR CHROMOSOME SEGREGATION%GOBP%GO:0098813	NUCLEAR CHROMOSOME SEGREGATION%GOBP%GO:0098813		30	0.62188	3.63187	0	0	0	679	tags=90%, list=22%, signal=114%
CELL CYCLE%WIKIPATHWAYS_20200510%WP179%HOMO SAPIENS	CELL CYCLE%WIKIPATHWAYS_20200510%WP179%HOMO SAPIENS		24	0.629162	3.62593	0	0	0	1170	tags=100%, list=38%, signal=159%
SEPARATION OF SISTER CHROMATIDS%REACTOME DATABASE ID RELEASE 72%2467813	SEPARATION OF SISTER CHROMATIDS%REACTOME DATABASE ID RELEASE 72%2467813		21	0.715308	3.62046	0	0	0	663	tags=95%, list=21%, signal=120%
RESOLUTION OF SISTER CHROMATID COHESION%REACTOME%R-HSA-2500257.1	RESOLUTION OF SISTER CHROMATID COHESION%REACTOME%R-HSA-2500257.1		20	0.711128	3.60461	0	0	0	663	tags=95%, list=21%, signal=120%
REGULATION OF SISTER CHROMATID SEGREGATION%GOBP%GO:0033045	REGULATION OF SISTER CHROMATID SEGREGATION%GOBP%GO:0033045		15	0.778606	3.49928	0	0	0	572	tags=93%, list=18%, signal=114%
MITOTIC SPINDLE CHECKPOINT%REACTOME%R-HSA-69618.2	MITOTIC SPINDLE CHECKPOINT%REACTOME%R-HSA-69618.2		18	0.702223	3.49028	0	0	0	663	tags=94%, list=21%, signal=119%
MICROTUBULE CYTOSKELETON ORGANIZATION INVOLVED IN MITOSIS%GOBP%GO:1902850	MICROTUBULE CYTOSKELETON ORGANIZATION INVOLVED IN MITOSIS%GOBP%GO:1902850		18	0.70799	3.47182	0	0	0	761	tags=94%, list=24%, signal=124%
DNA REPLICATION%GOBP%GO:0006260	DNA REPLICATION%GOBP%GO:0006260		18	0.721282	3.42663	0	0	0	609	tags=89%, list=20%, signal=110%
NUCLEAR DIVISION%GOBP%GO:0000280	NUCLEAR DIVISION%GOBP%GO:0000280		38	0.494106	3.40932	0	0	0	752	tags=84%, list=24%, signal=110%
MITOTIC G1 PHASE AND G1 S TRANSITION%REACTOME DATABASE ID RELEASE 72%453279	MITOTIC G1 PHASE AND G1 S TRANSITION%REACTOME DATABASE ID RELEASE 72%453279		18	0.678941	3.36434	0	0	0	655	tags=89%, list=21%, signal=112%
AMPLIFICATION OF SIGNAL FROM THE KINETOCHORES%REACTOME%R-HSA-141424.2	AMPLIFICATION OF SIGNAL FROM THE KINETOCHORES%REACTOME%R-HSA-141424.2		17	0.69712	3.32786	0	0	0	663	tags=94%, list=21%, signal=119%
DNA INTEGRITY CHECKPOINT%GOBP%GO:0031570	DNA INTEGRITY CHECKPOINT%GOBP%GO:0031570		20	0.671122	3.32307	0	0	0	655	tags=90%, list=21%, signal=113%
AMPLIFICATION OF SIGNAL FROM UNATTACHED KINETOCHORES VIA A MAD2 INHIBITORY SIGNAL%REACTOME DATABASE ID RELEASE 72%141444	AMPLIFICATION OF SIGNAL FROM UNATTACHED KINETOCHORES VIA A MAD2 INHIBITORY SIGNAL%REACTOME DATABASE ID RELEASE 72%141444		17	0.69712	3.32121	0	0	0	663	tags=94%, list=21%, signal=119%
EML4 AND NUDC IN MITOTIC SPINDLE FORMATION%REACTOME DATABASE ID RELEASE 72%9648025	EML4 AND NUDC IN MITOTIC SPINDLE FORMATION%REACTOME DATABASE ID RELEASE 72%9648025		17	0.69712	3.29531	0	0	0	663	tags=94%, list=21%, signal=119%
HALLMARK_P53_PATHWAY%MSIGDB_C2%HALLMARK_P53_PATHWAY	HALLMARK_P53_PATHWAY%MSIGDB_C2%HALLMARK_P53_PATHWAY		47	0.495153	3.29385	0	0	0	746	tags=74%, list=24%, signal=96%
TRANSCRIPTIONAL REGULATION BY TP53%REACTOME DATABASE ID RELEASE 72%3700989	TRANSCRIPTIONAL REGULATION BY TP53%REACTOME DATABASE ID RELEASE 72%3700989		28	0.568834	3.28529	0	0	0	779	tags=86%, list=25%, signal=113%
RHO GTPASES ACTIVATE FORMINS%REACTOME%R-HSA-5663220.1	RHO GTPASES ACTIVATE FORMINS%REACTOME%R-HSA-5663220.1		20	0.625658	3.20844	0	0	0	687	tags=85%, list=22%, signal=108%
VALIDATED TRANSCRIPTIONAL TARGETS OF TAP63 ISOFORMS%PATHWAY INTERACTION DATABASE NCI-NATURE CURATED DATA%VALIDATED TRANSCRIPTIONAL TARGETS OF TAP63 ISOFORMS	VALIDATED TRANSCRIPTIONAL TARGETS OF TAP63 ISOFORMS%PATHWAY INTERACTION DATABASE NCI-NATURE CURATED DATA%VALIDATED TRANSCRIPTIONAL TARGETS OF TAP63 ISOFORMS		16	0.690281	3.20457	0	0	0	837	tags=94%, list=27%, signal=128%
REGULATION OF CELL CYCLE PHASE TRANSITION%GOBP%GO:1901987	REGULATION OF CELL CYCLE PHASE TRANSITION%GOBP%GO:1901987		58	0.387942	3.19865	0	0	0	655	tags=66%, list=21%, signal=81%
CHROMOSOME ORGANIZATION%GOBP%GO:0051276	CHROMOSOME ORGANIZATION%GOBP%GO:0051276		58	0.406686	3.16674	0	0	0	749	tags=74%, list=24%, signal=96%
CELL DEATH%GOBP%GO:0008219	CELL DEATH%GOBP%GO:0008219		128	0.315266	3.14681	0	0	0	239	tags=31%, list=8%, signal=32%
CELL CYCLE%GOBP%GO:0007049	CELL CYCLE%GOBP%GO:0007049		122	0.360789	3.14108	0	0	0	663	tags=63%, list=21%, signal=77%
PID_TAP63_PATHWAY%MSIGDB_C2%PID_TAP63_PATHWAY	PID_TAP63_PATHWAY%MSIGDB_C2%PID_TAP63_PATHWAY		16	0.690281	3.12452	0	0	0	837	tags=94%, list=27%, signal=128%
MITOTIC G2-G2 M PHASES%REACTOME DATABASE ID RELEASE 72%453274	MITOTIC G2-G2 M PHASES%REACTOME DATABASE ID RELEASE 72%453274		15	0.677296	3.10291	0	0	0	740	tags=93%, list=24%, signal=122%
ORGANELLE FISSION%GOBP%GO:0048285	ORGANELLE FISSION%GOBP%GO:0048285		39	0.467969	3.08081	0	0	0	752	tags=82%, list=24%, signal=107%
REGULATION OF MITOTIC NUCLEAR DIVISION%GOBP%GO:0007088	REGULATION OF MITOTIC NUCLEAR DIVISION%GOBP%GO:0007088		34	0.471957	2.99208	0	0	0	622	tags=74%, list=20%, signal=91%
EPITHELIUM DEVELOPMENT%GOBP%GO:0060429	EPITHELIUM DEVELOPMENT%GOBP%GO:0060429		159	0.329416	2.96469	0	0	0	381	tags=37%, list=12%, signal=40%
G2 M TRANSITION%REACTOME DATABASE ID RELEASE 72%69275	G2 M TRANSITION%REACTOME DATABASE ID RELEASE 72%69275		15	0.677296	2.94237	0	0	0	740	tags=93%, list=24%, signal=122%
HALLMARK_MTORC1_SIGNALING%MSIGDB_C2%HALLMARK_MTORC1_SIGNALING	HALLMARK_MTORC1_SIGNALING%MSIGDB_C2%HALLMARK_MTORC1_SIGNALING		38	0.432133	2.91701	0	0	0	757	tags=82%, list=24%, signal=106%
DNA CONFORMATION CHANGE%GOBP%GO:0071103	DNA CONFORMATION CHANGE%GOBP%GO:0071103		18	0.573046	2.87091	0	0	0	609	tags=78%, list=20%, signal=96%
SPINDLE ORGANIZATION%GOBP%GO:0007051	SPINDLE ORGANIZATION%GOBP%GO:0007051		18	0.602778	2.86047	0	0	0	988	tags=94%, list=32%, signal=137%
PID_DELTA_NP63_PATHWAY%MSIGDB_C2%PID_DELTA_NP63_PATHWAY	PID_DELTA_NP63_PATHWAY%MSIGDB_C2%PID_DELTA_NP63_PATHWAY		18	0.556195	2.83717	0	0	0	551	tags=67%, list=18%, signal=81%
DNA REPAIR%GOBP%GO:0006281	DNA REPAIR%GOBP%GO:0006281		23	0.512265	2.81662	0	4.15254e-05	0.001	779	tags=83%, list=25%, signal=109%
DNA DAMAGE CHECKPOINT%GOBP%GO:0000077	DNA DAMAGE CHECKPOINT%GOBP%GO:0000077		15	0.635626	2.81557	0	4.08333e-05	0.001	655	tags=87%, list=21%, signal=109%
VALIDATED TRANSCRIPTIONAL TARGETS OF DELTANP63 ISOFORMS%PATHWAY INTERACTION DATABASE NCI-NATURE CURATED DATA%VALIDATED TRANSCRIPTIONAL TARGETS OF DELTANP63 ISOFORMS	VALIDATED TRANSCRIPTIONAL TARGETS OF DELTANP63 ISOFORMS%PATHWAY INTERACTION DATABASE NCI-NATURE CURATED DATA%VALIDATED TRANSCRIPTIONAL TARGETS OF DELTANP63 ISOFORMS		18	0.556195	2.80224	0	4.01639e-05	0.001	551	tags=67%, list=18%, signal=81%
CELL CYCLE PROCESS%GOBP%GO:0022402	CELL CYCLE PROCESS%GOBP%GO:0022402		113	0.357459	2.79478	0	3.95161e-05	0.001	761	tags=69%, list=24%, signal=88%
REGULATION OF NUCLEAR DIVISION%GOBP%GO:0051783	REGULATION OF NUCLEAR DIVISION%GOBP%GO:0051783		35	0.45672	2.76006	0	3.88889e-05	0.001	622	tags=71%, list=20%, signal=88%
DNA PACKAGING%GOBP%GO:0006323	DNA PACKAGING%GOBP%GO:0006323		15	0.622802	2.75682	0	3.82812e-05	0.001	553	tags=80%, list=18%, signal=97%
REGULATION OF MITOTIC CELL CYCLE PHASE TRANSITION%GOBP%GO:1901990	REGULATION OF MITOTIC CELL CYCLE PHASE TRANSITION%GOBP%GO:1901990		52	0.371624	2.72311	0	3.76923e-05	0.001	655	tags=67%, list=21%, signal=84%
EGFR1%NETPATH%EGFR1	EGFR1%NETPATH%EGFR1		74	0.316444	2.7042	0	3.71212e-05	0.001	1738	tags=93%, list=56%, signal=206%
CELLULAR SENESCENCE%REACTOME DATABASE ID RELEASE 72%2559583	CELLULAR SENESCENCE%REACTOME DATABASE ID RELEASE 72%2559583		21	0.504359	2.61121	0	7.2875e-05	0.002	859	tags=86%, list=28%, signal=118%
SIGNAL TRANSDUCTION IN RESPONSE TO DNA DAMAGE%GOBP%GO:0042770	SIGNAL TRANSDUCTION IN RESPONSE TO DNA DAMAGE%GOBP%GO:0042770		15	0.562266	2.58657	0	7.18033e-05	0.002	655	tags=80%, list=21%, signal=101%
POSITIVE REGULATION OF CELL CYCLE PROCESS%GOBP%GO:0090068	POSITIVE REGULATION OF CELL CYCLE PROCESS%GOBP%GO:0090068		44	0.359542	2.57617	0	0.000105284	0.003	657	tags=70%, list=21%, signal=88%
MICROTUBULE CYTOSKELETON ORGANIZATION%GOBP%GO:0000226	MICROTUBULE CYTOSKELETON ORGANIZATION%GOBP%GO:0000226		55	0.32533	2.55514	0	0.000181065	0.005	910	tags=76%, list=29%, signal=106%
DNA METABOLIC PROCESS%GOBP%GO:0006259	DNA METABOLIC PROCESS%GOBP%GO:0006259		42	0.369704	2.55103	0	0.000178514	0.005	779	tags=74%, list=25%, signal=97%
PROGRAMMED CELL DEATH%GOBP%GO:0012501	PROGRAMMED CELL DEATH%GOBP%GO:0012501		118	0.333078	2.54439	0	0.000210808	0.006	239	tags=33%, list=8%, signal=34%
HALLMARK_MITOTIC_SPINDLE%MSIGDB_C2%HALLMARK_MITOTIC_SPINDLE	HALLMARK_MITOTIC_SPINDLE%MSIGDB_C2%HALLMARK_MITOTIC_SPINDLE		32	0.414691	2.52786	0	0.00020792	0.006	679	tags=69%, list=22%, signal=87%
EGFR1%IOB%EGFR1	EGFR1%IOB%EGFR1		73	0.315171	2.50706	0	0.000205111	0.006	1738	tags=93%, list=56%, signal=206%
NEGATIVE REGULATION OF CELL CYCLE PHASE TRANSITION%GOBP%GO:1901988	NEGATIVE REGULATION OF CELL CYCLE PHASE TRANSITION%GOBP%GO:1901988		34	0.396989	2.48985	0	0.000202376	0.006	655	tags=68%, list=21%, signal=85%
REGULATION OF CELL CYCLE PROCESS%GOBP%GO:0010564	REGULATION OF CELL CYCLE PROCESS%GOBP%GO:0010564		93	0.307366	2.45967	0	0.000265429	0.008	657	tags=60%, list=21%, signal=74%
NEGATIVE REGULATION OF CELL CYCLE PROCESS%GOBP%GO:0010948	NEGATIVE REGULATION OF CELL CYCLE PROCESS%GOBP%GO:0010948		44	0.372199	2.43902	0	0.000297336	0.009	606	tags=64%, list=19%, signal=78%
REGULATION OF CELL DIVISION%GOBP%GO:0051302	REGULATION OF CELL DIVISION%GOBP%GO:0051302		21	0.483292	2.4218	0	0.000327879	0.01	679	tags=81%, list=22%, signal=103%
HALLMARK_CHOLESTEROL_HOMEOSTASIS%MSIGDB_C2%HALLMARK_CHOLESTEROL_HOMEOSTASIS	HALLMARK_CHOLESTEROL_HOMEOSTASIS%MSIGDB_C2%HALLMARK_CHOLESTEROL_HOMEOSTASIS		21	0.459344	2.35594	0	0.000586615	0.018	1052	tags=90%, list=34%, signal=136%
NEGATIVE REGULATION OF MITOTIC CELL CYCLE%GOBP%GO:0045930	NEGATIVE REGULATION OF MITOTIC CELL CYCLE%GOBP%GO:0045930		43	0.336002	2.35591	0	0.000579282	0.018	663	tags=63%, list=21%, signal=79%
REGULATION OF MITOTIC CELL CYCLE%GOBP%GO:0007346	REGULATION OF MITOTIC CELL CYCLE%GOBP%GO:0007346		89	0.262484	2.34517	0	0.00057213	0.018	666	tags=57%, list=21%, signal=71%
HAIR FOLLICLE DEVELOPMENT: CYTODIFFERENTIATION (PART 3 OF 3)%WIKIPATHWAYS_20200510%WP2840%HOMO SAPIENS	HAIR FOLLICLE DEVELOPMENT: CYTODIFFERENTIATION (PART 3 OF 3)%WIKIPATHWAYS_20200510%WP2840%HOMO SAPIENS		35	0.360136	2.28944	0	0.000894668	0.028	592	tags=54%, list=19%, signal=66%
MITOTIC CELL CYCLE PHASE TRANSITION%GOBP%GO:0044772	MITOTIC CELL CYCLE PHASE TRANSITION%GOBP%GO:0044772		37	0.360372	2.27138	0	0.00108198	0.034	761	tags=70%, list=24%, signal=92%
MICROTUBULE-BASED PROCESS%GOBP%GO:0007017	MICROTUBULE-BASED PROCESS%GOBP%GO:0007017		67	0.291375	2.26765	0	0.00119661	0.038	910	tags=73%, list=29%, signal=101%
POSITIVE REGULATION OF CELL CYCLE PHASE TRANSITION%GOBP%GO:1901989	POSITIVE REGULATION OF CELL CYCLE PHASE TRANSITION%GOBP%GO:1901989		17	0.469319	2.2543	0.00746269	0.00151715	0.049	705	tags=76%, list=23%, signal=98%
CELLULAR RESPONSE TO DNA DAMAGE STIMULUS%GOBP%GO:0006974	CELLULAR RESPONSE TO DNA DAMAGE STIMULUS%GOBP%GO:0006974		56	0.305036	2.20886	0	0.00234577	0.074	779	tags=66%, list=25%, signal=87%
PEPTIDE CROSS-LINKING%GOBP%GO:0018149	PEPTIDE CROSS-LINKING%GOBP%GO:0018149		15	0.476663	2.20857	0	0.00231881	0.074	280	tags=53%, list=9%, signal=58%
G1/S TRANSITION OF MITOTIC CELL CYCLE%GOBP%GO:0000082	G1/S TRANSITION OF MITOTIC CELL CYCLE%GOBP%GO:0000082		17	0.44306	2.19705	0	0.00249969	0.081	958	tags=88%, list=31%, signal=127%
CYTOKINESIS%GOBP%GO:0000910	CYTOKINESIS%GOBP%GO:0000910		15	0.46686	2.1743	0	0.00287571	0.093	679	tags=80%, list=22%, signal=102%
REGULATION OF CELL CYCLE G2/M PHASE TRANSITION%GOBP%GO:1902749	REGULATION OF CELL CYCLE G2/M PHASE TRANSITION%GOBP%GO:1902749		22	0.407188	2.17401	0	0.00284376	0.093	655	tags=73%, list=21%, signal=91%
NEGATIVE REGULATION OF MITOTIC CELL CYCLE PHASE TRANSITION%GOBP%GO:1901991	NEGATIVE REGULATION OF MITOTIC CELL CYCLE PHASE TRANSITION%GOBP%GO:1901991		31	0.35021	2.15681	0	0.00312928	0.102	655	tags=65%, list=21%, signal=81%
CYTOSKELETON-DEPENDENT CYTOKINESIS%GOBP%GO:0061640	CYTOSKELETON-DEPENDENT CYTOKINESIS%GOBP%GO:0061640		15	0.46686	2.11845	0	0.00408347	0.128	679	tags=80%, list=22%, signal=102%
REGULATION OF STEROID BIOSYNTHETIC PROCESS%GOBP%GO:0050810	REGULATION OF STEROID BIOSYNTHETIC PROCESS%GOBP%GO:0050810		15	0.461315	2.10813	0	0.0042314	0.134	894	tags=87%, list=29%, signal=121%
REGULATION OF CHROMOSOME ORGANIZATION%GOBP%GO:0033044	REGULATION OF CHROMOSOME ORGANIZATION%GOBP%GO:0033044		32	0.333256	2.08354	0	0.00500836	0.159	596	tags=63%, list=19%, signal=76%
REGULATION OF EPIDERMIS DEVELOPMENT%GOBP%GO:0045682	REGULATION OF EPIDERMIS DEVELOPMENT%GOBP%GO:0045682		15	0.463864	2.07681	0	0.00510177	0.161	539	tags=67%, list=17%, signal=80%
CELL CYCLE PHASE TRANSITION%GOBP%GO:0044770	CELL CYCLE PHASE TRANSITION%GOBP%GO:0044770		38	0.323175	2.07357	0	0.00519084	0.165	761	tags=68%, list=24%, signal=89%
CELL CYCLE G1/S PHASE TRANSITION%GOBP%GO:0044843	CELL CYCLE G1/S PHASE TRANSITION%GOBP%GO:0044843		17	0.44306	2.07168	0	0.00518968	0.166	958	tags=88%, list=31%, signal=127%
REGULATION OF G2/M TRANSITION OF MITOTIC CELL CYCLE%GOBP%GO:0010389	REGULATION OF G2/M TRANSITION OF MITOTIC CELL CYCLE%GOBP%GO:0010389		21	0.395714	2.05628	0	0.00567539	0.183	655	tags=71%, list=21%, signal=90%
POSITIVE REGULATION OF CELL CYCLE%GOBP%GO:0045787	POSITIVE REGULATION OF CELL CYCLE%GOBP%GO:0045787		52	0.285239	2.00981	0	0.00733267	0.234	666	tags=63%, list=21%, signal=79%
PID_P53_DOWNSTREAM_PATHWAY%MSIGDB_C2%PID_P53_DOWNSTREAM_PATHWAY	PID_P53_DOWNSTREAM_PATHWAY%MSIGDB_C2%PID_P53_DOWNSTREAM_PATHWAY		24	0.355661	1.99507	0	0.00801404	0.258	766	tags=67%, list=25%, signal=88%
DIRECT P53 EFFECTORS%PATHWAY INTERACTION DATABASE NCI-NATURE CURATED DATA%DIRECT P53 EFFECTORS	DIRECT P53 EFFECTORS%PATHWAY INTERACTION DATABASE NCI-NATURE CURATED DATA%DIRECT P53 EFFECTORS		24	0.355661	1.96482	0.0117647	0.0095212	0.304	766	tags=67%, list=25%, signal=88%
REGULATION OF CELL CYCLE%GOBP%GO:0051726	REGULATION OF CELL CYCLE%GOBP%GO:0051726		143	0.208073	1.93151	0	0.0121663	0.372	666	tags=50%, list=21%, signal=60%
CELL DIVISION%GOBP%GO:0051301	CELL DIVISION%GOBP%GO:0051301		20	0.364574	1.85935	0	0.0185701	0.506	679	tags=70%, list=22%, signal=89%
DNA REPAIR%REACTOME DATABASE ID RELEASE 72%73894	DNA REPAIR%REACTOME DATABASE ID RELEASE 72%73894		17	0.386152	1.84912	0.0163934	0.0194164	0.527	779	tags=76%, list=25%, signal=101%
HALLMARK_ESTROGEN_RESPONSE_LATE%MSIGDB_C2%HALLMARK_ESTROGEN_RESPONSE_LATE	HALLMARK_ESTROGEN_RESPONSE_LATE%MSIGDB_C2%HALLMARK_ESTROGEN_RESPONSE_LATE		68	0.222368	1.84108	0	0.0202107	0.542	621	tags=49%, list=20%, signal=59%
ERBB SIGNALING PATHWAY%GOBP%GO:0038127	ERBB SIGNALING PATHWAY%GOBP%GO:0038127		15	0.404067	1.83668	0	0.0205077	0.554	302	tags=40%, list=10%, signal=44%
NEGATIVE REGULATION OF RESPONSE TO WOUNDING%GOBP%GO:1903035	NEGATIVE REGULATION OF RESPONSE TO WOUNDING%GOBP%GO:1903035		22	0.337162	1.81785	0	0.0227509	0.587	293	tags=32%, list=9%, signal=35%
NEGATIVE REGULATION OF CELL CYCLE%GOBP%GO:0045786	NEGATIVE REGULATION OF CELL CYCLE%GOBP%GO:0045786		73	0.242352	1.79477	0	0.025625	0.647	663	tags=52%, list=21%, signal=65%
ENDOTHELIAL CELL DEVELOPMENT%GOBP%GO:0001885	ENDOTHELIAL CELL DEVELOPMENT%GOBP%GO:0001885		15	0.395551	1.79104	0.0133333	0.025778	0.652	1889	tags=100%, list=61%, signal=253%
INTRA-GOLGI AND RETROGRADE GOLGI-TO-ER TRAFFIC%REACTOME DATABASE ID RELEASE 72%6811442	INTRA-GOLGI AND RETROGRADE GOLGI-TO-ER TRAFFIC%REACTOME DATABASE ID RELEASE 72%6811442		16	0.376443	1.78972	0.0138889	0.0258447	0.657	819	tags=75%, list=26%, signal=101%
INTRINSIC APOPTOTIC SIGNALING PATHWAY%GOBP%GO:0097193	INTRINSIC APOPTOTIC SIGNALING PATHWAY%GOBP%GO:0097193		16	0.382838	1.76765	0.0152672	0.0290667	0.706	1516	tags=94%, list=49%, signal=182%
POSITIVE REGULATION OF APOPTOTIC SIGNALING PATHWAY%GOBP%GO:2001235	POSITIVE REGULATION OF APOPTOTIC SIGNALING PATHWAY%GOBP%GO:2001235		17	0.362903	1.75558	0.0075188	0.0308529	0.726	1991	tags=100%, list=64%, signal=275%
POSITIVE REGULATION OF NUCLEAR DIVISION%GOBP%GO:0051785	POSITIVE REGULATION OF NUCLEAR DIVISION%GOBP%GO:0051785		18	0.344371	1.73852	0	0.033757	0.762	553	tags=61%, list=18%, signal=74%
POSITIVE REGULATION OF MITOTIC NUCLEAR DIVISION%GOBP%GO:0045840	POSITIVE REGULATION OF MITOTIC NUCLEAR DIVISION%GOBP%GO:0045840		17	0.36354	1.73812	0.0307692	0.0335971	0.762	553	tags=65%, list=18%, signal=78%
REGULATION OF PEPTIDASE ACTIVITY%GOBP%GO:0052547	REGULATION OF PEPTIDASE ACTIVITY%GOBP%GO:0052547		56	0.212402	1.7285	0	0.0351423	0.783	239	tags=21%, list=8%, signal=23%
NEGATIVE REGULATION OF PEPTIDASE ACTIVITY%GOBP%GO:0010466	NEGATIVE REGULATION OF PEPTIDASE ACTIVITY%GOBP%GO:0010466		33	0.273055	1.71345	0	0.0376564	0.808	239	tags=27%, list=8%, signal=29%
PEPTIDYL-SERINE PHOSPHORYLATION%GOBP%GO:0018105	PEPTIDYL-SERINE PHOSPHORYLATION%GOBP%GO:0018105		27	0.293731	1.70985	0.0208333	0.038073	0.813	1578	tags=89%, list=51%, signal=178%
HALLMARK_KRAS_SIGNALING_DN%MSIGDB_C2%HALLMARK_KRAS_SIGNALING_DN	HALLMARK_KRAS_SIGNALING_DN%MSIGDB_C2%HALLMARK_KRAS_SIGNALING_DN		49	0.247876	1.69194	0	0.0413038	0.85	234	tags=33%, list=8%, signal=35%
INTRACELLULAR PROTEIN TRANSPORT%GOBP%GO:0006886	INTRACELLULAR PROTEIN TRANSPORT%GOBP%GO:0006886		40	0.237569	1.67661	0	0.0453107	0.879	2385	tags=100%, list=77%, signal=420%
G2/M TRANSITION OF MITOTIC CELL CYCLE%GOBP%GO:0000086	G2/M TRANSITION OF MITOTIC CELL CYCLE%GOBP%GO:0000086		19	0.328276	1.65659	0	0.0504318	0.914	2099	tags=100%, list=67%, signal=304%
PID_REG_GR_PATHWAY%MSIGDB_C2%PID_REG_GR_PATHWAY	PID_REG_GR_PATHWAY%MSIGDB_C2%PID_REG_GR_PATHWAY		20	0.325412	1.64347	0.0183486	0.0538052	0.934	175	tags=30%, list=6%, signal=32%
PROGRAMMED CELL DEATH%REACTOME%R-HSA-5357801.2	PROGRAMMED CELL DEATH%REACTOME%R-HSA-5357801.2		19	0.323112	1.6352	0.00833333	0.0561869	0.94	2115	tags=100%, list=68%, signal=309%
GLUCOCORTICOID RECEPTOR REGULATORY NETWORK%PATHWAY INTERACTION DATABASE NCI-NATURE CURATED DATA%GLUCOCORTICOID RECEPTOR REGULATORY NETWORK	GLUCOCORTICOID RECEPTOR REGULATORY NETWORK%PATHWAY INTERACTION DATABASE NCI-NATURE CURATED DATA%GLUCOCORTICOID RECEPTOR REGULATORY NETWORK		20	0.325412	1.62683	0.0181818	0.0585478	0.948	175	tags=30%, list=6%, signal=32%
CELL CYCLE G2/M PHASE TRANSITION%GOBP%GO:0044839	CELL CYCLE G2/M PHASE TRANSITION%GOBP%GO:0044839		19	0.328276	1.60588	0.026087	0.0653724	0.966	2099	tags=100%, list=67%, signal=304%
NEGATIVE REGULATION OF WOUND HEALING%GOBP%GO:0061045	NEGATIVE REGULATION OF WOUND HEALING%GOBP%GO:0061045		20	0.318846	1.59561	0.0330578	0.0687503	0.972	293	tags=30%, list=9%, signal=33%
RESPONSE TO ENDOPLASMIC RETICULUM STRESS%GOBP%GO:0034976	RESPONSE TO ENDOPLASMIC RETICULUM STRESS%GOBP%GO:0034976		21	0.308785	1.59063	0.03	0.0704326	0.973	2160	tags=100%, list=69%, signal=324%
REGULATION OF CELL CYCLE G1/S PHASE TRANSITION%GOBP%GO:1902806	REGULATION OF CELL CYCLE G1/S PHASE TRANSITION%GOBP%GO:1902806		31	0.270205	1.58795	0.0487805	0.070928	0.974	738	tags=58%, list=24%, signal=75%
EPITHELIAL CELL DEVELOPMENT%GOBP%GO:0002064	EPITHELIAL CELL DEVELOPMENT%GOBP%GO:0002064		29	0.269152	1.58548	0	0.0711765	0.974	1634	tags=90%, list=52%, signal=187%
APOPTOSIS%REACTOME%R-HSA-109581.3	APOPTOSIS%REACTOME%R-HSA-109581.3		18	0.323007	1.57861	0.0384615	0.0734847	0.981	2115	tags=100%, list=68%, signal=309%
CELLULAR RESPONSE TO STARVATION%GOBP%GO:0009267	CELLULAR RESPONSE TO STARVATION%GOBP%GO:0009267		19	0.326937	1.57569	0.00813008	0.0741545	0.984	1776	tags=95%, list=57%, signal=219%
MEMBRANE LIPID BIOSYNTHETIC PROCESS%GOBP%GO:0046467	MEMBRANE LIPID BIOSYNTHETIC PROCESS%GOBP%GO:0046467		25	0.289675	1.56952	0.0125	0.0760944	0.985	255	tags=32%, list=8%, signal=35%
TOLL-LIKE RECEPTOR SIGNALING PATHWAY%GOBP%GO:0002224	TOLL-LIKE RECEPTOR SIGNALING PATHWAY%GOBP%GO:0002224		23	0.277671	1.54568	0.0210526	0.0867706	0.993	111	tags=22%, list=4%, signal=22%
NEGATIVE REGULATION OF ENDOPEPTIDASE ACTIVITY%GOBP%GO:0010951	NEGATIVE REGULATION OF ENDOPEPTIDASE ACTIVITY%GOBP%GO:0010951		30	0.239401	1.53838	0	0.0898784	0.997	221	tags=23%, list=7%, signal=25%
NEGATIVE REGULATION OF PROTEOLYSIS%GOBP%GO:0045861	NEGATIVE REGULATION OF PROTEOLYSIS%GOBP%GO:0045861		40	0.222201	1.51582	0.0175439	0.100803	0.999	413	tags=33%, list=13%, signal=37%
CELLULAR LIPID CATABOLIC PROCESS%GOBP%GO:0044242	CELLULAR LIPID CATABOLIC PROCESS%GOBP%GO:0044242		22	0.282946	1.51469	0.0409836	0.100609	0.999	279	tags=41%, list=9%, signal=45%
ANTIMICROBIAL HUMORAL IMMUNE RESPONSE MEDIATED BY ANTIMICROBIAL PEPTIDE%GOBP%GO:0061844	ANTIMICROBIAL HUMORAL IMMUNE RESPONSE MEDIATED BY ANTIMICROBIAL PEPTIDE%GOBP%GO:0061844		15	0.343976	1.50835	0.0509554	0.103138	0.999	117	tags=40%, list=4%, signal=41%
SPHINGOLIPID BIOSYNTHETIC PROCESS%GOBP%GO:0030148	SPHINGOLIPID BIOSYNTHETIC PROCESS%GOBP%GO:0030148		21	0.287018	1.50653	0.0434783	0.103259	0.999	255	tags=33%, list=8%, signal=36%
MEMBRANE LIPID METABOLIC PROCESS%GOBP%GO:0006643	MEMBRANE LIPID METABOLIC PROCESS%GOBP%GO:0006643		30	0.246278	1.50348	0.0142857	0.104296	0.999	282	tags=30%, list=9%, signal=33%
HEPATITIS B INFECTION%WIKIPATHWAYS_20200510%WP4666%HOMO SAPIENS	HEPATITIS B INFECTION%WIKIPATHWAYS_20200510%WP4666%HOMO SAPIENS		17	0.324839	1.48476	0.0592593	0.115115	0.999	2109	tags=100%, list=68%, signal=308%
MEIOTIC CELL CYCLE PROCESS%GOBP%GO:1903046	MEIOTIC CELL CYCLE PROCESS%GOBP%GO:1903046		17	0.321339	1.48467	0.0731707	0.11435	0.999	515	tags=59%, list=17%, signal=70%
POSITIVE REGULATION OF BLOOD VESSEL ENDOTHELIAL CELL MIGRATION%GOBP%GO:0043536	POSITIVE REGULATION OF BLOOD VESSEL ENDOTHELIAL CELL MIGRATION%GOBP%GO:0043536		18	0.302033	1.46545	0.056	0.125809	1	2180	tags=100%, list=70%, signal=331%
EPITHELIAL TO MESENCHYMAL TRANSITION%GOBP%GO:0001837	EPITHELIAL TO MESENCHYMAL TRANSITION%GOBP%GO:0001837		15	0.328175	1.46005	0.0503597	0.128819	1	2098	tags=100%, list=67%, signal=304%
POSITIVE REGULATION OF ENDOPEPTIDASE ACTIVITY%GOBP%GO:0010950	POSITIVE REGULATION OF ENDOPEPTIDASE ACTIVITY%GOBP%GO:0010950		16	0.321395	1.45668	0.0551181	0.130606	1	716	tags=63%, list=23%, signal=81%
METABOLISM OF STEROIDS%REACTOME DATABASE ID RELEASE 72%8957322	METABOLISM OF STEROIDS%REACTOME DATABASE ID RELEASE 72%8957322		28	0.241721	1.44267	0.0461538	0.140214	1	953	tags=71%, list=31%, signal=102%
REGULATION OF ENDOPEPTIDASE ACTIVITY%GOBP%GO:0052548	REGULATION OF ENDOPEPTIDASE ACTIVITY%GOBP%GO:0052548		48	0.21014	1.42601	0	0.151286	1	221	tags=21%, list=7%, signal=22%
GASTRIN SIGNALING PATHWAY%WIKIPATHWAYS_20200510%WP4659%HOMO SAPIENS	GASTRIN SIGNALING PATHWAY%WIKIPATHWAYS_20200510%WP4659%HOMO SAPIENS		20	0.269469	1.42383	0.07	0.152055	1	1264	tags=80%, list=41%, signal=134%
ANTIMICROBIAL PEPTIDES%REACTOME DATABASE ID RELEASE 72%6803157	ANTIMICROBIAL PEPTIDES%REACTOME DATABASE ID RELEASE 72%6803157		17	0.309445	1.405	0.0729927	0.167216	1	117	tags=35%, list=4%, signal=36%
REGULATION OF HEMOSTASIS%GOBP%GO:1900046	REGULATION OF HEMOSTASIS%GOBP%GO:1900046		24	0.25879	1.39467	0.0638298	0.175358	1	371	tags=33%, list=12%, signal=38%
MODIFICATION OF MORPHOLOGY OR PHYSIOLOGY OF OTHER ORGANISM%GOBP%GO:0035821	MODIFICATION OF MORPHOLOGY OR PHYSIOLOGY OF OTHER ORGANISM%GOBP%GO:0035821		19	0.286653	1.39421	0.109489	0.174688	1	117	tags=26%, list=4%, signal=27%
PATTERN RECOGNITION RECEPTOR SIGNALING PATHWAY%GOBP%GO:0002221	PATTERN RECOGNITION RECEPTOR SIGNALING PATHWAY%GOBP%GO:0002221		27	0.235887	1.3846	0.0813954	0.182545	1	111	tags=19%, list=4%, signal=19%
REGULATION OF COAGULATION%GOBP%GO:0050818	REGULATION OF COAGULATION%GOBP%GO:0050818		25	0.251415	1.37756	0.0947368	0.187684	1	293	tags=28%, list=9%, signal=31%
MEIOTIC NUCLEAR DIVISION%GOBP%GO:0140013	MEIOTIC NUCLEAR DIVISION%GOBP%GO:0140013		15	0.310914	1.37698	0.0993789	0.186992	1	515	tags=60%, list=17%, signal=72%
HALLMARK_GLYCOLYSIS%MSIGDB_C2%HALLMARK_GLYCOLYSIS	HALLMARK_GLYCOLYSIS%MSIGDB_C2%HALLMARK_GLYCOLYSIS		34	0.22194	1.37526	0.128571	0.187306	1	918	tags=68%, list=29%, signal=95%
NEGATIVE REGULATION OF NEURON PROJECTION DEVELOPMENT%GOBP%GO:0010977	NEGATIVE REGULATION OF NEURON PROJECTION DEVELOPMENT%GOBP%GO:0010977		18	0.279122	1.37154	0.0655738	0.189575	1	2251	tags=100%, list=72%, signal=358%
REGULATION OF BLOOD COAGULATION%GOBP%GO:0030193	REGULATION OF BLOOD COAGULATION%GOBP%GO:0030193		24	0.25879	1.37133	0.0609756	0.188435	1	371	tags=33%, list=12%, signal=38%
REGULATION OF ALCOHOL BIOSYNTHETIC PROCESS%GOBP%GO:1902930	REGULATION OF ALCOHOL BIOSYNTHETIC PROCESS%GOBP%GO:1902930		17	0.291123	1.35487	0.110345	0.203809	1	784	tags=71%, list=25%, signal=94%
EXTRA-NUCLEAR ESTROGEN SIGNALING%REACTOME DATABASE ID RELEASE 72%9009391	EXTRA-NUCLEAR ESTROGEN SIGNALING%REACTOME DATABASE ID RELEASE 72%9009391		19	0.26856	1.34907	0.0967742	0.209365	1	2284	tags=100%, list=73%, signal=372%
NUCLEAR RECEPTORS META-PATHWAY%WIKIPATHWAYS_20200510%WP2882%HOMO SAPIENS	NUCLEAR RECEPTORS META-PATHWAY%WIKIPATHWAYS_20200510%WP2882%HOMO SAPIENS		74	0.165807	1.34747	0.111111	0.209794	1	514	tags=34%, list=16%, signal=39%
REGULATION OF EPIDERMAL GROWTH FACTOR RECEPTOR SIGNALING PATHWAY%GOBP%GO:0042058	REGULATION OF EPIDERMAL GROWTH FACTOR RECEPTOR SIGNALING PATHWAY%GOBP%GO:0042058		15	0.294789	1.3458	0.0915033	0.210332	1	462	tags=40%, list=15%, signal=47%
VITAMIN D RECEPTOR PATHWAY%WIKIPATHWAYS_20200510%WP2877%HOMO SAPIENS	VITAMIN D RECEPTOR PATHWAY%WIKIPATHWAYS_20200510%WP2877%HOMO SAPIENS		55	0.184371	1.34158	0.0666667	0.213099	1	363	tags=25%, list=12%, signal=28%
ANGIOPOIETIN LIKE PROTEIN 8 REGULATORY PATHWAY%WIKIPATHWAYS_20200510%WP3915%HOMO SAPIENS	ANGIOPOIETIN LIKE PROTEIN 8 REGULATORY PATHWAY%WIKIPATHWAYS_20200510%WP3915%HOMO SAPIENS		20	0.258748	1.33693	0.0882353	0.21723	1	821	tags=70%, list=26%, signal=94%
AMIDE BIOSYNTHETIC PROCESS%GOBP%GO:0043604	AMIDE BIOSYNTHETIC PROCESS%GOBP%GO:0043604		31	0.217351	1.32924	0.118421	0.224906	1	789	tags=58%, list=25%, signal=77%
SPHINGOLIPID METABOLIC PROCESS%GOBP%GO:0006665	SPHINGOLIPID METABOLIC PROCESS%GOBP%GO:0006665		26	0.240971	1.32697	0.112676	0.22578	1	282	tags=31%, list=9%, signal=34%
POSITIVE REGULATION OF CELLULAR PROTEIN CATABOLIC PROCESS%GOBP%GO:1903364	POSITIVE REGULATION OF CELLULAR PROTEIN CATABOLIC PROCESS%GOBP%GO:1903364		21	0.247806	1.32334	0.0877193	0.228602	1	1372	tags=81%, list=44%, signal=144%
HALLMARK_INTERFERON_ALPHA_RESPONSE%MSIGDB_C2%HALLMARK_INTERFERON_ALPHA_RESPONSE	HALLMARK_INTERFERON_ALPHA_RESPONSE%MSIGDB_C2%HALLMARK_INTERFERON_ALPHA_RESPONSE		22	0.248465	1.32168	0.145631	0.229114	1	2347	tags=100%, list=75%, signal=402%
WNT SIGNALING PATHWAY AND PLURIPOTENCY%WIKIPATHWAYS_20200510%WP399%HOMO SAPIENS	WNT SIGNALING PATHWAY AND PLURIPOTENCY%WIKIPATHWAYS_20200510%WP399%HOMO SAPIENS		22	0.242289	1.31334	0.0884956	0.237696	1	1472	tags=86%, list=47%, signal=162%
POSITIVE REGULATION OF PEPTIDASE ACTIVITY%GOBP%GO:0010952	POSITIVE REGULATION OF PEPTIDASE ACTIVITY%GOBP%GO:0010952		20	0.253964	1.31302	0.153846	0.236556	1	716	tags=55%, list=23%, signal=71%
MEIOTIC CELL CYCLE%GOBP%GO:0051321	MEIOTIC CELL CYCLE%GOBP%GO:0051321		19	0.267616	1.31159	0.140351	0.236774	1	515	tags=53%, list=17%, signal=63%
LIPID CATABOLIC PROCESS%GOBP%GO:0016042	LIPID CATABOLIC PROCESS%GOBP%GO:0016042		32	0.214445	1.30932	0.111111	0.23774	1	333	tags=34%, list=11%, signal=38%
REGULATION OF ERBB SIGNALING PATHWAY%GOBP%GO:1901184	REGULATION OF ERBB SIGNALING PATHWAY%GOBP%GO:1901184		15	0.294789	1.3063	0.121212	0.239955	1	462	tags=40%, list=15%, signal=47%
NEGATIVE REGULATION OF CELL CYCLE G1/S PHASE TRANSITION%GOBP%GO:1902807	NEGATIVE REGULATION OF CELL CYCLE G1/S PHASE TRANSITION%GOBP%GO:1902807		19	0.253621	1.30301	0.128205	0.242233	1	655	tags=53%, list=21%, signal=66%
REGULATION OF CYCLIN-DEPENDENT PROTEIN KINASE ACTIVITY%GOBP%GO:1904029	REGULATION OF CYCLIN-DEPENDENT PROTEIN KINASE ACTIVITY%GOBP%GO:1904029		16	0.283361	1.30127	0.154839	0.242967	1	1154	tags=81%, list=37%, signal=128%
SENESCENCE AND AUTOPHAGY IN CANCER%WIKIPATHWAYS_20200510%WP615%HOMO SAPIENS	SENESCENCE AND AUTOPHAGY IN CANCER%WIKIPATHWAYS_20200510%WP615%HOMO SAPIENS		21	0.246533	1.29978	0.123894	0.243835	1	297	tags=29%, list=10%, signal=31%
HALLMARK_HYPOXIA%MSIGDB_C2%HALLMARK_HYPOXIA	HALLMARK_HYPOXIA%MSIGDB_C2%HALLMARK_HYPOXIA		47	0.17979	1.29241	0.147059	0.250882	1	1885	tags=89%, list=60%, signal=223%
PATHWAYS IN CLEAR CELL RENAL CELL CARCINOMA%WIKIPATHWAYS_20200510%WP4018%HOMO SAPIENS	PATHWAYS IN CLEAR CELL RENAL CELL CARCINOMA%WIKIPATHWAYS_20200510%WP4018%HOMO SAPIENS		19	0.265333	1.28593	0.12	0.257638	1	2294	tags=100%, list=74%, signal=376%
VITAMIN METABOLIC PROCESS%GOBP%GO:0006766	VITAMIN METABOLIC PROCESS%GOBP%GO:0006766		23	0.229113	1.285	0.0686275	0.257528	1	333	tags=35%, list=11%, signal=39%
LONG-CHAIN FATTY ACID METABOLIC PROCESS%GOBP%GO:0001676	LONG-CHAIN FATTY ACID METABOLIC PROCESS%GOBP%GO:0001676		19	0.263718	1.28193	0.141593	0.259701	1	223	tags=32%, list=7%, signal=34%
HALLMARK_ESTROGEN_RESPONSE_EARLY%MSIGDB_C2%HALLMARK_ESTROGEN_RESPONSE_EARLY	HALLMARK_ESTROGEN_RESPONSE_EARLY%MSIGDB_C2%HALLMARK_ESTROGEN_RESPONSE_EARLY		60	0.170824	1.28011	0.0952381	0.260438	1	479	tags=35%, list=15%, signal=41%
REGULATION OF UBIQUITIN-DEPENDENT PROTEIN CATABOLIC PROCESS%GOBP%GO:2000058	REGULATION OF UBIQUITIN-DEPENDENT PROTEIN CATABOLIC PROCESS%GOBP%GO:2000058		15	0.29117	1.27525	0.140741	0.265362	1	1833	tags=93%, list=59%, signal=225%
NEGATIVE REGULATION OF EXTRINSIC APOPTOTIC SIGNALING PATHWAY%GOBP%GO:2001237	NEGATIVE REGULATION OF EXTRINSIC APOPTOTIC SIGNALING PATHWAY%GOBP%GO:2001237		17	0.265205	1.26499	0.164179	0.277994	1	47	tags=18%, list=2%, signal=18%
NUCLEOBASE-CONTAINING SMALL MOLECULE BIOSYNTHETIC PROCESS%GOBP%GO:0034404	NUCLEOBASE-CONTAINING SMALL MOLECULE BIOSYNTHETIC PROCESS%GOBP%GO:0034404		18	0.265247	1.26464	0.137097	0.276953	1	2294	tags=100%, list=74%, signal=377%
NEGATIVE REGULATION OF CELL MORPHOGENESIS INVOLVED IN DIFFERENTIATION%GOBP%GO:0010771	NEGATIVE REGULATION OF CELL MORPHOGENESIS INVOLVED IN DIFFERENTIATION%GOBP%GO:0010771		15	0.278852	1.25295	0.145833	0.291005	1	2251	tags=100%, list=72%, signal=358%
REGULATION OF PROTEOLYSIS INVOLVED IN CELLULAR PROTEIN CATABOLIC PROCESS%GOBP%GO:1903050	REGULATION OF PROTEOLYSIS INVOLVED IN CELLULAR PROTEIN CATABOLIC PROCESS%GOBP%GO:1903050		20	0.247336	1.24721	0.172727	0.297026	1	2350	tags=100%, list=75%, signal=404%
CELLULAR RESPONSES TO STRESS%REACTOME DATABASE ID RELEASE 72%2262752	CELLULAR RESPONSES TO STRESS%REACTOME DATABASE ID RELEASE 72%2262752		46	0.1707	1.24619	0.125	0.296987	1	859	tags=59%, list=28%, signal=80%
PROTEASOMAL PROTEIN CATABOLIC PROCESS%GOBP%GO:0010498	PROTEASOMAL PROTEIN CATABOLIC PROCESS%GOBP%GO:0010498		22	0.235398	1.24512	0.165049	0.296875	1	675	tags=59%, list=22%, signal=75%
LIPID HOMEOSTASIS%GOBP%GO:0055088	LIPID HOMEOSTASIS%GOBP%GO:0055088		20	0.234194	1.24217	0.186441	0.299625	1	319	tags=30%, list=10%, signal=33%
REGULATION OF PROTEIN MODIFICATION BY SMALL PROTEIN CONJUGATION OR REMOVAL%GOBP%GO:1903320	REGULATION OF PROTEIN MODIFICATION BY SMALL PROTEIN CONJUGATION OR REMOVAL%GOBP%GO:1903320		23	0.21874	1.23354	0.150538	0.310207	1	1833	tags=91%, list=59%, signal=220%
SIGNALING BY NUCLEAR RECEPTORS%REACTOME%R-HSA-9006931.5	SIGNALING BY NUCLEAR RECEPTORS%REACTOME%R-HSA-9006931.5		38	0.179422	1.23007	0.212766	0.313963	1	232	tags=24%, list=7%, signal=25%
NEGATIVE REGULATION OF NEURON DIFFERENTIATION%GOBP%GO:0045665	NEGATIVE REGULATION OF NEURON DIFFERENTIATION%GOBP%GO:0045665		26	0.2187	1.22788	0.152174	0.315767	1	2440	tags=100%, list=78%, signal=457%
NEGATIVE REGULATION OF HYDROLASE ACTIVITY%GOBP%GO:0051346	NEGATIVE REGULATION OF HYDROLASE ACTIVITY%GOBP%GO:0051346		49	0.169617	1.22701	0.113636	0.315319	1	239	tags=18%, list=8%, signal=20%
DEUBIQUITINATION%REACTOME%R-HSA-5688426.3	DEUBIQUITINATION%REACTOME%R-HSA-5688426.3		15	0.271326	1.22146	0.193333	0.321997	1	1811	tags=93%, list=58%, signal=222%
HOMOTYPIC CELL-CELL ADHESION%GOBP%GO:0034109	HOMOTYPIC CELL-CELL ADHESION%GOBP%GO:0034109		17	0.259266	1.21982	0.192308	0.323083	1	511	tags=47%, list=16%, signal=56%
REGULATION OF PROTEASOMAL PROTEIN CATABOLIC PROCESS%GOBP%GO:0061136	REGULATION OF PROTEASOMAL PROTEIN CATABOLIC PROCESS%GOBP%GO:0061136		18	0.247176	1.21965	0.196721	0.321727	1	2350	tags=100%, list=75%, signal=404%
UBIQUITIN-DEPENDENT PROTEIN CATABOLIC PROCESS%GOBP%GO:0006511	UBIQUITIN-DEPENDENT PROTEIN CATABOLIC PROCESS%GOBP%GO:0006511		28	0.214836	1.21644	0.119403	0.324369	1	904	tags=68%, list=29%, signal=95%
MODIFICATION-DEPENDENT PROTEIN CATABOLIC PROCESS%GOBP%GO:0019941	MODIFICATION-DEPENDENT PROTEIN CATABOLIC PROCESS%GOBP%GO:0019941		29	0.201094	1.21113	0.209877	0.330745	1	777	tags=59%, list=25%, signal=77%
REGULATION OF G1/S TRANSITION OF MITOTIC CELL CYCLE%GOBP%GO:2000045	REGULATION OF G1/S TRANSITION OF MITOTIC CELL CYCLE%GOBP%GO:2000045		26	0.216768	1.20804	0.188235	0.333863	1	655	tags=54%, list=21%, signal=68%
POSITIVE REGULATION OF PROTEOLYSIS INVOLVED IN CELLULAR PROTEIN CATABOLIC PROCESS%GOBP%GO:1903052	POSITIVE REGULATION OF PROTEOLYSIS INVOLVED IN CELLULAR PROTEIN CATABOLIC PROCESS%GOBP%GO:1903052		17	0.247097	1.20712	0.212121	0.333663	1	2350	tags=100%, list=75%, signal=404%
DISEASES OF SIGNAL TRANSDUCTION BY GROWTH FACTOR RECEPTORS AND SECOND MESSENGERS%REACTOME DATABASE ID RELEASE 72%5663202	DISEASES OF SIGNAL TRANSDUCTION BY GROWTH FACTOR RECEPTORS AND SECOND MESSENGERS%REACTOME DATABASE ID RELEASE 72%5663202		49	0.165634	1.20661	0.105263	0.332764	1	116	tags=12%, list=4%, signal=13%
PROTEIN MODIFICATION BY SMALL PROTEIN REMOVAL%GOBP%GO:0070646	PROTEIN MODIFICATION BY SMALL PROTEIN REMOVAL%GOBP%GO:0070646		15	0.267478	1.20139	0.225352	0.338827	1	1811	tags=93%, list=58%, signal=222%
NEGATIVE REGULATION OF PROTEIN BINDING%GOBP%GO:0032091	NEGATIVE REGULATION OF PROTEIN BINDING%GOBP%GO:0032091		25	0.205419	1.19604	0.181818	0.345689	1	2014	tags=92%, list=65%, signal=258%
NUCLEOSIDE PHOSPHATE CATABOLIC PROCESS%GOBP%GO:1901292	NUCLEOSIDE PHOSPHATE CATABOLIC PROCESS%GOBP%GO:1901292		16	0.265076	1.19603	0.214815	0.34397	1	2294	tags=100%, list=74%, signal=377%
REGULATION OF RESPONSE TO CYTOKINE STIMULUS%GOBP%GO:0060759	REGULATION OF RESPONSE TO CYTOKINE STIMULUS%GOBP%GO:0060759		25	0.213334	1.19411	0.191919	0.345159	1	2200	tags=96%, list=71%, signal=324%
PROTEASOME-MEDIATED UBIQUITIN-DEPENDENT PROTEIN CATABOLIC PROCESS%GOBP%GO:0043161	PROTEASOME-MEDIATED UBIQUITIN-DEPENDENT PROTEIN CATABOLIC PROCESS%GOBP%GO:0043161		18	0.245117	1.19261	0.245614	0.345831	1	675	tags=61%, list=22%, signal=78%
INSULIN SIGNALING%WIKIPATHWAYS_20200510%WP481%HOMO SAPIENS	INSULIN SIGNALING%WIKIPATHWAYS_20200510%WP481%HOMO SAPIENS		22	0.222306	1.18526	0.258427	0.355364	1	1633	tags=86%, list=52%, signal=180%
NUCLEOTIDE CATABOLIC PROCESS%GOBP%GO:0009166	NUCLEOTIDE CATABOLIC PROCESS%GOBP%GO:0009166		15	0.26499	1.18442	0.202797	0.355014	1	2294	tags=100%, list=74%, signal=377%
REGULATION OF CYCLIN-DEPENDENT PROTEIN SERINE/THREONINE KINASE ACTIVITY%GOBP%GO:0000079	REGULATION OF CYCLIN-DEPENDENT PROTEIN SERINE/THREONINE KINASE ACTIVITY%GOBP%GO:0000079		15	0.267956	1.18267	0.228758	0.356109	1	958	tags=73%, list=31%, signal=105%
NON-GENOMIC ACTIONS OF 1,25 DIHYDROXYVITAMIN D3%WIKIPATHWAYS_20200510%WP4341%HOMO SAPIENS	NON-GENOMIC ACTIONS OF 1,25 DIHYDROXYVITAMIN D3%WIKIPATHWAYS_20200510%WP4341%HOMO SAPIENS		19	0.243706	1.17942	0.251968	0.359575	1	2361	tags=100%, list=76%, signal=410%
MODIFICATION-DEPENDENT MACROMOLECULE CATABOLIC PROCESS%GOBP%GO:0043632	MODIFICATION-DEPENDENT MACROMOLECULE CATABOLIC PROCESS%GOBP%GO:0043632		29	0.201094	1.17496	0.189873	0.364961	1	777	tags=59%, list=25%, signal=77%
ALZHEIMERS DISEASE%WIKIPATHWAYS_20200510%WP2059%HOMO SAPIENS	ALZHEIMERS DISEASE%WIKIPATHWAYS_20200510%WP2059%HOMO SAPIENS		16	0.260239	1.1744	0.245902	0.36416	1	2309	tags=100%, list=74%, signal=384%
REGULATION OF LIPID BIOSYNTHETIC PROCESS%GOBP%GO:0046890	REGULATION OF LIPID BIOSYNTHETIC PROCESS%GOBP%GO:0046890		32	0.185906	1.1693	0.170732	0.370963	1	802	tags=56%, list=26%, signal=75%
TOLL-LIKE RECEPTOR CASCADES%REACTOME DATABASE ID RELEASE 72%168898	TOLL-LIKE RECEPTOR CASCADES%REACTOME DATABASE ID RELEASE 72%168898		28	0.191498	1.16739	0.264368	0.372116	1	111	tags=14%, list=4%, signal=15%
REGULATION OF STEROID METABOLIC PROCESS%GOBP%GO:0019218	REGULATION OF STEROID METABOLIC PROCESS%GOBP%GO:0019218		19	0.232636	1.16521	0.231481	0.373748	1	784	tags=63%, list=25%, signal=84%
REGULATION OF PROTEIN UBIQUITINATION%GOBP%GO:0031396	REGULATION OF PROTEIN UBIQUITINATION%GOBP%GO:0031396		22	0.207092	1.16462	0.175824	0.372862	1	1833	tags=91%, list=59%, signal=219%
REGULATION OF CYTOKINE-MEDIATED SIGNALING PATHWAY%GOBP%GO:0001959	REGULATION OF CYTOKINE-MEDIATED SIGNALING PATHWAY%GOBP%GO:0001959		23	0.205876	1.16277	0.282828	0.374183	1	2200	tags=96%, list=71%, signal=323%
ENDODERM DIFFERENTIATION%WIKIPATHWAYS_20200510%WP2853%HOMO SAPIENS	ENDODERM DIFFERENTIATION%WIKIPATHWAYS_20200510%WP2853%HOMO SAPIENS		26	0.207493	1.16255	0.2	0.372759	1	1775	tags=88%, list=57%, signal=204%
PROTEIN DEUBIQUITINATION%GOBP%GO:0016579	PROTEIN DEUBIQUITINATION%GOBP%GO:0016579		15	0.267478	1.15749	0.258741	0.379572	1	1811	tags=93%, list=58%, signal=222%
POSITIVE REGULATION OF INNATE IMMUNE RESPONSE%GOBP%GO:0045089	POSITIVE REGULATION OF INNATE IMMUNE RESPONSE%GOBP%GO:0045089		55	0.160588	1.15467	0.227273	0.382327	1	198	tags=18%, list=6%, signal=19%
DEATH RECEPTOR SIGNALLING%REACTOME%R-HSA-73887.4	DEATH RECEPTOR SIGNALLING%REACTOME%R-HSA-73887.4		16	0.248629	1.15331	0.244755	0.382623	1	2345	tags=100%, list=75%, signal=402%
GOLGI VESICLE TRANSPORT%GOBP%GO:0048193	GOLGI VESICLE TRANSPORT%GOBP%GO:0048193		23	0.212346	1.15261	0.254386	0.382025	1	2459	tags=100%, list=79%, signal=470%
TGF_BETA_RECEPTOR%IOB%TGF_BETA_RECEPTOR	TGF_BETA_RECEPTOR%IOB%TGF_BETA_RECEPTOR		25	0.209857	1.14871	0.241758	0.386874	1	2000	tags=92%, list=64%, signal=255%
TRANSCRIPTION, DNA-TEMPLATED%GOBP%GO:0006351	TRANSCRIPTION, DNA-TEMPLATED%GOBP%GO:0006351		45	0.165903	1.14284	0.235294	0.39505	1	1852	tags=89%, list=59%, signal=216%
REGULATION OF EPITHELIAL CELL APOPTOTIC PROCESS%GOBP%GO:1904035	REGULATION OF EPITHELIAL CELL APOPTOTIC PROCESS%GOBP%GO:1904035		15	0.26044	1.13467	0.251748	0.407446	1	44	tags=20%, list=1%, signal=20%
POSITIVE REGULATION OF PROTEIN TYROSINE KINASE ACTIVITY%GOBP%GO:0061098	POSITIVE REGULATION OF PROTEIN TYROSINE KINASE ACTIVITY%GOBP%GO:0061098		16	0.234172	1.1346	0.3	0.405789	1	232	tags=25%, list=7%, signal=27%
NUCLEIC ACID-TEMPLATED TRANSCRIPTION%GOBP%GO:0097659	NUCLEIC ACID-TEMPLATED TRANSCRIPTION%GOBP%GO:0097659		45	0.165903	1.13369	0.333333	0.405399	1	1852	tags=89%, list=59%, signal=216%
POSITIVE REGULATION OF PROTEASOMAL PROTEIN CATABOLIC PROCESS%GOBP%GO:1901800	POSITIVE REGULATION OF PROTEASOMAL PROTEIN CATABOLIC PROCESS%GOBP%GO:1901800		15	0.246937	1.13287	0.287671	0.404958	1	2350	tags=100%, list=75%, signal=404%
REGULATION OF NOTCH SIGNALING PATHWAY%GOBP%GO:0008593	REGULATION OF NOTCH SIGNALING PATHWAY%GOBP%GO:0008593		17	0.24	1.12166	0.29927	0.423356	1	2372	tags=100%, list=76%, signal=416%
RNA BIOSYNTHETIC PROCESS%GOBP%GO:0032774	RNA BIOSYNTHETIC PROCESS%GOBP%GO:0032774		45	0.165903	1.12153	0.272727	0.421734	1	1852	tags=89%, list=59%, signal=216%
MICROTUBULE-BASED MOVEMENT%GOBP%GO:0007018	MICROTUBULE-BASED MOVEMENT%GOBP%GO:0007018		24	0.204762	1.11996	0.291139	0.422324	1	695	tags=54%, list=22%, signal=69%
REGULATION OF EXTRINSIC APOPTOTIC SIGNALING PATHWAY%GOBP%GO:2001236	REGULATION OF EXTRINSIC APOPTOTIC SIGNALING PATHWAY%GOBP%GO:2001236		25	0.199434	1.11907	0.329545	0.422132	1	47	tags=12%, list=2%, signal=12%
PPAR SIGNALING PATHWAY%WIKIPATHWAYS_20200510%WP3942%HOMO SAPIENS	PPAR SIGNALING PATHWAY%WIKIPATHWAYS_20200510%WP3942%HOMO SAPIENS		19	0.230559	1.11809	0.293706	0.422438	1	214	tags=26%, list=7%, signal=28%
REGULATION OF BLOOD VESSEL ENDOTHELIAL CELL MIGRATION%GOBP%GO:0043535	REGULATION OF BLOOD VESSEL ENDOTHELIAL CELL MIGRATION%GOBP%GO:0043535		29	0.18153	1.10782	0.266667	0.439213	1	2180	tags=93%, list=70%, signal=307%
HALLMARK_PI3K_AKT_MTOR_SIGNALING%MSIGDB_C2%HALLMARK_PI3K_AKT_MTOR_SIGNALING	HALLMARK_PI3K_AKT_MTOR_SIGNALING%MSIGDB_C2%HALLMARK_PI3K_AKT_MTOR_SIGNALING		20	0.213963	1.10698	0.311321	0.439094	1	2038	tags=95%, list=65%, signal=273%
PI3K AKT SIGNALING%REACTOME%R-HSA-1257604.8	PI3K AKT SIGNALING%REACTOME%R-HSA-1257604.8		30	0.174197	1.10632	0.296296	0.438436	1	2002	tags=90%, list=64%, signal=249%
VISUAL PHOTOTRANSDUCTION%REACTOME%R-HSA-2187338.1	VISUAL PHOTOTRANSDUCTION%REACTOME%R-HSA-2187338.1		20	0.213642	1.09491	0.293578	0.457452	1	493	tags=35%, list=16%, signal=41%
REGULATION OF APOPTOTIC SIGNALING PATHWAY%GOBP%GO:2001233	REGULATION OF APOPTOTIC SIGNALING PATHWAY%GOBP%GO:2001233		44	0.152417	1.08608	0.264706	0.473098	1	171	tags=14%, list=5%, signal=14%
REGULATION OF TRANSLATION%GOBP%GO:0006417	REGULATION OF TRANSLATION%GOBP%GO:0006417		16	0.234347	1.08355	0.300813	0.47666	1	1996	tags=94%, list=64%, signal=259%
RESPONSE TO LIGHT STIMULUS%GOBP%GO:0009416	RESPONSE TO LIGHT STIMULUS%GOBP%GO:0009416		21	0.210307	1.08308	0.315789	0.475544	1	564	tags=43%, list=18%, signal=52%
STEROL HOMEOSTASIS%GOBP%GO:0055092	STEROL HOMEOSTASIS%GOBP%GO:0055092		15	0.23827	1.07323	0.373333	0.493232	1	319	tags=33%, list=10%, signal=37%
PI3K AKT SIGNALING IN CANCER%REACTOME%R-HSA-2219528.1	PI3K AKT SIGNALING IN CANCER%REACTOME%R-HSA-2219528.1		23	0.194684	1.07225	0.350515	0.49301	1	2002	tags=91%, list=64%, signal=253%
NEGATIVE REGULATION OF THE PI3K AKT NETWORK%REACTOME DATABASE ID RELEASE 72%199418	NEGATIVE REGULATION OF THE PI3K AKT NETWORK%REACTOME DATABASE ID RELEASE 72%199418		22	0.199439	1.06736	0.357798	0.500764	1	2002	tags=91%, list=64%, signal=252%
CHOLESTEROL HOMEOSTASIS%GOBP%GO:0042632	CHOLESTEROL HOMEOSTASIS%GOBP%GO:0042632		15	0.23827	1.06726	0.315068	0.498922	1	319	tags=33%, list=10%, signal=37%
NEGATIVE REGULATION OF PROTEIN COMPLEX ASSEMBLY%GOBP%GO:0031333	NEGATIVE REGULATION OF PROTEIN COMPLEX ASSEMBLY%GOBP%GO:0031333		18	0.212731	1.05904	0.365385	0.512927	1	2088	tags=94%, list=67%, signal=284%
RESPONSE TO STARVATION%GOBP%GO:0042594	RESPONSE TO STARVATION%GOBP%GO:0042594		22	0.20035	1.05611	0.391304	0.515972	1	1776	tags=91%, list=57%, signal=210%
INTRACELLULAR SIGNALING BY SECOND MESSENGERS%REACTOME DATABASE ID RELEASE 72%9006925	INTRACELLULAR SIGNALING BY SECOND MESSENGERS%REACTOME DATABASE ID RELEASE 72%9006925		41	0.153486	1.05412	0.305556	0.518205	1	2114	tags=90%, list=68%, signal=277%
REGULATION OF AUTOPHAGY%GOBP%GO:0010506	REGULATION OF AUTOPHAGY%GOBP%GO:0010506		30	0.176679	1.04699	0.453125	0.530406	1	2291	tags=97%, list=74%, signal=361%
TGF_BETA_RECEPTOR%NETPATH%TGF_BETA_RECEPTOR	TGF_BETA_RECEPTOR%NETPATH%TGF_BETA_RECEPTOR		26	0.180201	1.04255	0.383562	0.537536	1	2559	tags=100%, list=82%, signal=554%
INNATE IMMUNE RESPONSE-ACTIVATING SIGNAL TRANSDUCTION%GOBP%GO:0002758	INNATE IMMUNE RESPONSE-ACTIVATING SIGNAL TRANSDUCTION%GOBP%GO:0002758		37	0.161442	1.03618	0.411765	0.548068	1	111	tags=14%, list=4%, signal=14%
REGULATION OF CELLULAR PROTEIN CATABOLIC PROCESS%GOBP%GO:1903362	REGULATION OF CELLULAR PROTEIN CATABOLIC PROCESS%GOBP%GO:1903362		26	0.187321	1.03136	0.430233	0.556124	1	1372	tags=77%, list=44%, signal=136%
CELLULAR NITROGEN COMPOUND CATABOLIC PROCESS%GOBP%GO:0044270	CELLULAR NITROGEN COMPOUND CATABOLIC PROCESS%GOBP%GO:0044270		35	0.154871	1.02944	0.447761	0.55779	1	2406	tags=97%, list=77%, signal=421%
REGULATION OF PROTEIN BINDING%GOBP%GO:0043393	REGULATION OF PROTEIN BINDING%GOBP%GO:0043393		32	0.163371	1.02516	0.471264	0.564216	1	2612	tags=100%, list=84%, signal=611%
NRF2 PATHWAY%WIKIPATHWAYS_20200510%WP2884%HOMO SAPIENS	NRF2 PATHWAY%WIKIPATHWAYS_20200510%WP2884%HOMO SAPIENS		31	0.160938	1.02447	0.366197	0.563614	1	1224	tags=74%, list=39%, signal=121%
REGULATION OF MICROTUBULE CYTOSKELETON ORGANIZATION%GOBP%GO:0070507	REGULATION OF MICROTUBULE CYTOSKELETON ORGANIZATION%GOBP%GO:0070507		23	0.191282	1.02298	0.440367	0.564385	1	1881	tags=91%, list=60%, signal=229%
EPITHELIUM MIGRATION%GOBP%GO:0090132	EPITHELIUM MIGRATION%GOBP%GO:0090132		29	0.176313	1.02277	0.402778	0.562494	1	251	tags=21%, list=8%, signal=22%
CELL CYCLE ARREST%GOBP%GO:0007050	CELL CYCLE ARREST%GOBP%GO:0007050		16	0.21722	1.01133	0.412121	0.583185	1	1298	tags=81%, list=42%, signal=139%
REGULATION OF SIGNAL TRANSDUCTION BY P53 CLASS MEDIATOR%GOBP%GO:1901796	REGULATION OF SIGNAL TRANSDUCTION BY P53 CLASS MEDIATOR%GOBP%GO:1901796		17	0.214194	1.00811	0.445312	0.587992	1	2452	tags=100%, list=79%, signal=466%
EPITHELIAL CELL MIGRATION%GOBP%GO:0010631	EPITHELIAL CELL MIGRATION%GOBP%GO:0010631		29	0.176313	1.00246	0.428571	0.597251	1	251	tags=21%, list=8%, signal=22%
TRANSCRIPTION BY RNA POLYMERASE II%GOBP%GO:0006366	TRANSCRIPTION BY RNA POLYMERASE II%GOBP%GO:0006366		40	0.140756	1.00238	0.513513	0.595147	1	1852	tags=88%, list=59%, signal=213%
POSITIVE REGULATION OF PROTEOLYSIS%GOBP%GO:0045862	POSITIVE REGULATION OF PROTEOLYSIS%GOBP%GO:0045862		42	0.146992	1.00107	0.470588	0.595839	1	2664	tags=100%, list=85%, signal=679%
TRANSCRIPTIONAL REGULATION BY RUNX2%REACTOME DATABASE ID RELEASE 72%8878166	TRANSCRIPTIONAL REGULATION BY RUNX2%REACTOME DATABASE ID RELEASE 72%8878166		16	0.207352	0.998872	0.452703	0.598773	1	2473	tags=100%, list=79%, signal=482%
PID_INTEGRIN2_PATHWAY%MSIGDB_C2%PID_INTEGRIN2_PATHWAY	PID_INTEGRIN2_PATHWAY%MSIGDB_C2%PID_INTEGRIN2_PATHWAY		15	0.213293	0.995846	0.442953	0.602753	1	44	tags=13%, list=1%, signal=13%
NUCLEIC ACID METABOLIC PROCESS%GOBP%GO:0090304	NUCLEIC ACID METABOLIC PROCESS%GOBP%GO:0090304		99	0.119923	0.992109	0.333333	0.608542	1	849	tags=53%, list=27%, signal=70%
REGULATION OF RESPONSE TO WOUNDING%GOBP%GO:1903034	REGULATION OF RESPONSE TO WOUNDING%GOBP%GO:1903034		42	0.150931	0.991679	0.488889	0.607088	1	223	tags=17%, list=7%, signal=18%
CHROMATIN ORGANIZATION%GOBP%GO:0006325	CHROMATIN ORGANIZATION%GOBP%GO:0006325		29	0.162221	0.987484	0.493333	0.613274	1	749	tags=52%, list=24%, signal=67%
AMEBOIDAL-TYPE CELL MIGRATION%GOBP%GO:0001667	AMEBOIDAL-TYPE CELL MIGRATION%GOBP%GO:0001667		38	0.145481	0.98466	0.478261	0.616892	1	1872	tags=84%, list=60%, signal=208%
ISOPRENOID METABOLIC PROCESS%GOBP%GO:0006720	ISOPRENOID METABOLIC PROCESS%GOBP%GO:0006720		22	0.183109	0.979319	0.456311	0.626003	1	516	tags=36%, list=17%, signal=43%
BETA2 INTEGRIN CELL SURFACE INTERACTIONS%PATHWAY INTERACTION DATABASE NCI-NATURE CURATED DATA%BETA2 INTEGRIN CELL SURFACE INTERACTIONS	BETA2 INTEGRIN CELL SURFACE INTERACTIONS%PATHWAY INTERACTION DATABASE NCI-NATURE CURATED DATA%BETA2 INTEGRIN CELL SURFACE INTERACTIONS		15	0.213293	0.972876	0.508876	0.636839	1	44	tags=13%, list=1%, signal=13%
MITOCHONDRION ORGANIZATION%GOBP%GO:0007005	MITOCHONDRION ORGANIZATION%GOBP%GO:0007005		27	0.156384	0.960752	0.535714	0.659689	1	1782	tags=85%, list=57%, signal=197%
PROTEIN TRANSPORT%GOBP%GO:0015031	PROTEIN TRANSPORT%GOBP%GO:0015031		72	0.11943	0.95456	0.529412	0.670497	1	2457	tags=96%, list=79%, signal=442%
LIPID MODIFICATION%GOBP%GO:0030258	LIPID MODIFICATION%GOBP%GO:0030258		22	0.174423	0.943913	0.485149	0.691107	1	1761	tags=86%, list=56%, signal=197%
DITERPENOID METABOLIC PROCESS%GOBP%GO:0016101	DITERPENOID METABOLIC PROCESS%GOBP%GO:0016101		19	0.184223	0.93898	0.515625	0.699046	1	207	tags=21%, list=7%, signal=22%
PI5P, PP2A AND IER3 REGULATE PI3K AKT SIGNALING%REACTOME%R-HSA-6811558.2	PI5P, PP2A AND IER3 REGULATE PI3K AKT SIGNALING%REACTOME%R-HSA-6811558.2		20	0.183676	0.936491	0.612069	0.70132	1	2002	tags=90%, list=64%, signal=250%
REGULATION OF EPITHELIAL TO MESENCHYMAL TRANSITION%GOBP%GO:0010717	REGULATION OF EPITHELIAL TO MESENCHYMAL TRANSITION%GOBP%GO:0010717		18	0.189602	0.931755	0.545455	0.708673	1	2184	tags=94%, list=70%, signal=314%
HETEROCYCLE CATABOLIC PROCESS%GOBP%GO:0046700	HETEROCYCLE CATABOLIC PROCESS%GOBP%GO:0046700		34	0.150699	0.928799	0.568182	0.712328	1	2406	tags=97%, list=77%, signal=421%
RETINOID METABOLIC PROCESS%GOBP%GO:0001523	RETINOID METABOLIC PROCESS%GOBP%GO:0001523		19	0.184223	0.92798	0.5	0.711424	1	207	tags=21%, list=7%, signal=22%
POSITIVE REGULATION OF TRANSMEMBRANE RECEPTOR PROTEIN SERINE/THREONINE KINASE SIGNALING PATHWAY%GOBP%GO:0090100	POSITIVE REGULATION OF TRANSMEMBRANE RECEPTOR PROTEIN SERINE/THREONINE KINASE SIGNALING PATHWAY%GOBP%GO:0090100		19	0.185831	0.926923	0.591837	0.710881	1	1914	tags=89%, list=61%, signal=230%
TERPENOID METABOLIC PROCESS%GOBP%GO:0006721	TERPENOID METABOLIC PROCESS%GOBP%GO:0006721		20	0.180105	0.922872	0.59292	0.716096	1	207	tags=20%, list=7%, signal=21%
EGF RECEPTOR SIGNALING PATHWAY%PANTHER PATHWAY%P00018	EGF RECEPTOR SIGNALING PATHWAY%PANTHER PATHWAY%P00018		19	0.184287	0.921739	0.602041	0.716051	1	232	tags=21%, list=7%, signal=23%
PROTEIN CATABOLIC PROCESS%GOBP%GO:0030163	PROTEIN CATABOLIC PROCESS%GOBP%GO:0030163		51	0.124182	0.92032	0.608696	0.716452	1	777	tags=51%, list=25%, signal=67%
MAINTENANCE OF LOCATION%GOBP%GO:0051235	MAINTENANCE OF LOCATION%GOBP%GO:0051235		24	0.162321	0.916114	0.557692	0.721807	1	268	tags=21%, list=9%, signal=23%
REGULATION OF CELLULAR AMIDE METABOLIC PROCESS%GOBP%GO:0034248	REGULATION OF CELLULAR AMIDE METABOLIC PROCESS%GOBP%GO:0034248		24	0.160289	0.914901	0.61	0.721737	1	1996	tags=92%, list=64%, signal=253%
REGULATION OF WOUND HEALING%GOBP%GO:0061041	REGULATION OF WOUND HEALING%GOBP%GO:0061041		38	0.142054	0.913256	0.725	0.722306	1	223	tags=16%, list=7%, signal=17%
CELLULAR PROTEIN CATABOLIC PROCESS%GOBP%GO:0044257	CELLULAR PROTEIN CATABOLIC PROCESS%GOBP%GO:0044257		45	0.129884	0.910846	0.681818	0.725007	1	777	tags=51%, list=25%, signal=67%
ASPARAGINE N-LINKED GLYCOSYLATION%REACTOME DATABASE ID RELEASE 72%446203	ASPARAGINE N-LINKED GLYCOSYLATION%REACTOME DATABASE ID RELEASE 72%446203		20	0.184049	0.906647	0.552381	0.73114	1	2546	tags=100%, list=82%, signal=542%
REGULATION OF PROTEIN TYROSINE KINASE ACTIVITY%GOBP%GO:0061097	REGULATION OF PROTEIN TYROSINE KINASE ACTIVITY%GOBP%GO:0061097		20	0.179611	0.899775	0.596491	0.741879	1	232	tags=20%, list=7%, signal=21%
REGULATION OF INTRINSIC APOPTOTIC SIGNALING PATHWAY%GOBP%GO:2001242	REGULATION OF INTRINSIC APOPTOTIC SIGNALING PATHWAY%GOBP%GO:2001242		15	0.198844	0.899168	0.632911	0.740403	1	2026	tags=93%, list=65%, signal=265%
POSITIVE REGULATION OF CELL MORPHOGENESIS INVOLVED IN DIFFERENTIATION%GOBP%GO:0010770	POSITIVE REGULATION OF CELL MORPHOGENESIS INVOLVED IN DIFFERENTIATION%GOBP%GO:0010770		22	0.171039	0.897595	0.594059	0.741211	1	44	tags=9%, list=1%, signal=9%
MEMBRANE TRAFFICKING%REACTOME DATABASE ID RELEASE 72%199991	MEMBRANE TRAFFICKING%REACTOME DATABASE ID RELEASE 72%199991		79	0.116252	0.896845	0.888889	0.740214	1	877	tags=51%, list=28%, signal=69%
ENDOTHELIAL CELL MIGRATION%GOBP%GO:0043542	ENDOTHELIAL CELL MIGRATION%GOBP%GO:0043542		23	0.164176	0.896066	0.628866	0.739231	1	1872	tags=87%, list=60%, signal=216%
NUCLEOBASE-CONTAINING COMPOUND CATABOLIC PROCESS%GOBP%GO:0034655	NUCLEOBASE-CONTAINING COMPOUND CATABOLIC PROCESS%GOBP%GO:0034655		25	0.154241	0.887045	0.669811	0.754382	1	2294	tags=96%, list=74%, signal=361%
REGULATION OF JNK CASCADE%GOBP%GO:0046328	REGULATION OF JNK CASCADE%GOBP%GO:0046328		28	0.145429	0.883312	0.614286	0.759076	1	467	tags=32%, list=15%, signal=37%
HALLMARK_COAGULATION%MSIGDB_C2%HALLMARK_COAGULATION	HALLMARK_COAGULATION%MSIGDB_C2%HALLMARK_COAGULATION		42	0.129862	0.881984	0.674419	0.75883	1	49	tags=10%, list=2%, signal=10%
ESTABLISHMENT OF PROTEIN LOCALIZATION%GOBP%GO:0045184	ESTABLISHMENT OF PROTEIN LOCALIZATION%GOBP%GO:0045184		83	0.103057	0.881144	0.692308	0.757919	1	2385	tags=94%, list=77%, signal=390%
NEGATIVE REGULATION OF MAPK CASCADE%GOBP%GO:0043409	NEGATIVE REGULATION OF MAPK CASCADE%GOBP%GO:0043409		22	0.166609	0.880232	0.663462	0.757159	1	517	tags=41%, list=17%, signal=49%
INTEGRATED BREAST CANCER PATHWAY%WIKIPATHWAYS_20200510%WP1984%HOMO SAPIENS	INTEGRATED BREAST CANCER PATHWAY%WIKIPATHWAYS_20200510%WP1984%HOMO SAPIENS		18	0.177799	0.874709	0.654867	0.764521	1	2565	tags=100%, list=82%, signal=561%
METABOLISM OF LIPIDS%REACTOME DATABASE ID RELEASE 72%556833	METABOLISM OF LIPIDS%REACTOME DATABASE ID RELEASE 72%556833		104	0.112753	0.871703	0.75	0.767786	1	214	tags=15%, list=7%, signal=16%
DETOXIFICATION%GOBP%GO:0098754	DETOXIFICATION%GOBP%GO:0098754		15	0.190899	0.868893	0.618705	0.770127	1	65	tags=13%, list=2%, signal=14%
NEGATIVE REGULATION OF G1/S TRANSITION OF MITOTIC CELL CYCLE%GOBP%GO:2000134	NEGATIVE REGULATION OF G1/S TRANSITION OF MITOTIC CELL CYCLE%GOBP%GO:2000134		18	0.189009	0.86838	0.675	0.768657	1	655	tags=50%, list=21%, signal=63%
ENDOTHELIUM DEVELOPMENT%GOBP%GO:0003158	ENDOTHELIUM DEVELOPMENT%GOBP%GO:0003158		24	0.151215	0.863897	0.714286	0.774575	1	1914	tags=88%, list=61%, signal=225%
EMBRYO DEVELOPMENT ENDING IN BIRTH OR EGG HATCHING%GOBP%GO:0009792	EMBRYO DEVELOPMENT ENDING IN BIRTH OR EGG HATCHING%GOBP%GO:0009792		35	0.125577	0.86344	0.672131	0.772867	1	616	tags=40%, list=20%, signal=49%
SMALL MOLECULE CATABOLIC PROCESS%GOBP%GO:0044282	SMALL MOLECULE CATABOLIC PROCESS%GOBP%GO:0044282		55	0.121585	0.862772	0.842105	0.771415	1	2406	tags=95%, list=77%, signal=407%
TGF-BETA SIGNALING PATHWAY%WIKIPATHWAYS_20200510%WP366%HOMO SAPIENS	TGF-BETA SIGNALING PATHWAY%WIKIPATHWAYS_20200510%WP366%HOMO SAPIENS		18	0.179735	0.862321	0.676692	0.769718	1	2559	tags=100%, list=82%, signal=555%
BETA3 INTEGRIN CELL SURFACE INTERACTIONS%PATHWAY INTERACTION DATABASE NCI-NATURE CURATED DATA%BETA3 INTEGRIN CELL SURFACE INTERACTIONS	BETA3 INTEGRIN CELL SURFACE INTERACTIONS%PATHWAY INTERACTION DATABASE NCI-NATURE CURATED DATA%BETA3 INTEGRIN CELL SURFACE INTERACTIONS		18	0.176209	0.85956	0.649254	0.772296	1	44	tags=11%, list=1%, signal=11%
REGULATION OF MICROTUBULE-BASED PROCESS%GOBP%GO:0032886	REGULATION OF MICROTUBULE-BASED PROCESS%GOBP%GO:0032886		27	0.14787	0.850423	0.75	0.786357	1	761	tags=56%, list=24%, signal=73%
ENDOSOMAL TRANSPORT%GOBP%GO:0016197	ENDOSOMAL TRANSPORT%GOBP%GO:0016197		17	0.175502	0.849268	0.690647	0.786003	1	1020	tags=71%, list=33%, signal=104%
POSITIVE REGULATION OF PROTEIN MODIFICATION BY SMALL PROTEIN CONJUGATION OR REMOVAL%GOBP%GO:1903322	POSITIVE REGULATION OF PROTEIN MODIFICATION BY SMALL PROTEIN CONJUGATION OR REMOVAL%GOBP%GO:1903322		15	0.185696	0.84888	0.664179	0.78414	1	681	tags=53%, list=22%, signal=68%
CELLULAR RESPONSE TO TOXIC SUBSTANCE%GOBP%GO:0097237	CELLULAR RESPONSE TO TOXIC SUBSTANCE%GOBP%GO:0097237		19	0.169141	0.847214	0.715385	0.784298	1	2592	tags=100%, list=83%, signal=590%
INTRACELLULAR TRANSPORT%GOBP%GO:0046907	INTRACELLULAR TRANSPORT%GOBP%GO:0046907		105	0.0886453	0.844227	0.875	0.787122	1	2849	tags=100%, list=91%, signal=1124%
PID_INTEGRIN3_PATHWAY%MSIGDB_C2%PID_INTEGRIN3_PATHWAY	PID_INTEGRIN3_PATHWAY%MSIGDB_C2%PID_INTEGRIN3_PATHWAY		19	0.171201	0.843106	0.732824	0.78667	1	44	tags=11%, list=1%, signal=11%
MESODERMAL COMMITMENT PATHWAY%WIKIPATHWAYS_20200510%WP2857%HOMO SAPIENS	MESODERMAL COMMITMENT PATHWAY%WIKIPATHWAYS_20200510%WP2857%HOMO SAPIENS		23	0.158904	0.830119	0.727273	0.806497	1	878	tags=57%, list=28%, signal=78%
NEGATIVE REGULATION OF EPITHELIAL CELL PROLIFERATION%GOBP%GO:0050680	NEGATIVE REGULATION OF EPITHELIAL CELL PROLIFERATION%GOBP%GO:0050680		25	0.155941	0.824582	0.795918	0.813049	1	2160	tags=92%, list=69%, signal=297%
ORGANELLE BIOGENESIS AND MAINTENANCE%REACTOME%R-HSA-1852241.5	ORGANELLE BIOGENESIS AND MAINTENANCE%REACTOME%R-HSA-1852241.5		17	0.179677	0.823859	0.702479	0.81172	1	2559	tags=100%, list=82%, signal=556%
PEPTIDYL-SERINE MODIFICATION%GOBP%GO:0018209	PEPTIDYL-SERINE MODIFICATION%GOBP%GO:0018209		31	0.137316	0.821615	0.716418	0.812804	1	1578	tags=81%, list=51%, signal=162%
NEGATIVE REGULATION OF CATALYTIC ACTIVITY%GOBP%GO:0043086	NEGATIVE REGULATION OF CATALYTIC ACTIVITY%GOBP%GO:0043086		82	0.103459	0.821392	0.882353	0.810688	1	429	tags=23%, list=14%, signal=26%
CELLULAR RESPONSE TO STRESS%GOBP%GO:0033554	CELLULAR RESPONSE TO STRESS%GOBP%GO:0033554		155	0.0929782	0.818448	0.666667	0.813015	1	779	tags=45%, list=25%, signal=57%
FACTORS INVOLVED IN MEGAKARYOCYTE DEVELOPMENT AND PLATELET PRODUCTION%REACTOME DATABASE ID RELEASE 72%983231	FACTORS INVOLVED IN MEGAKARYOCYTE DEVELOPMENT AND PLATELET PRODUCTION%REACTOME DATABASE ID RELEASE 72%983231		17	0.173765	0.816281	0.763636	0.814114	1	868	tags=65%, list=28%, signal=89%
REGULATION OF SYMBIOSIS, ENCOMPASSING MUTUALISM THROUGH PARASITISM%GOBP%GO:0043903	REGULATION OF SYMBIOSIS, ENCOMPASSING MUTUALISM THROUGH PARASITISM%GOBP%GO:0043903		26	0.141904	0.810285	0.77907	0.820744	1	235	tags=15%, list=8%, signal=17%
CELLULAR MACROMOLECULE BIOSYNTHETIC PROCESS%GOBP%GO:0034645	CELLULAR MACROMOLECULE BIOSYNTHETIC PROCESS%GOBP%GO:0034645		113	0.104206	0.808776	0.75	0.820799	1	1852	tags=85%, list=59%, signal=202%
ORGANIC HYDROXY COMPOUND METABOLIC PROCESS%GOBP%GO:1901615	ORGANIC HYDROXY COMPOUND METABOLIC PROCESS%GOBP%GO:1901615		67	0.101728	0.805741	0.863636	0.823337	1	200	tags=13%, list=6%, signal=14%
POSITIVE REGULATION OF NF-KAPPAB TRANSCRIPTION FACTOR ACTIVITY%GOBP%GO:0051092	POSITIVE REGULATION OF NF-KAPPAB TRANSCRIPTION FACTOR ACTIVITY%GOBP%GO:0051092		24	0.146136	0.802474	0.747126	0.826101	1	2664	tags=100%, list=85%, signal=683%
STEROL METABOLIC PROCESS%GOBP%GO:0016125	STEROL METABOLIC PROCESS%GOBP%GO:0016125		15	0.178365	0.801244	0.76129	0.825462	1	1023	tags=73%, list=33%, signal=109%
REGULATION OF EPITHELIAL CELL DIFFERENTIATION%GOBP%GO:0030856	REGULATION OF EPITHELIAL CELL DIFFERENTIATION%GOBP%GO:0030856		22	0.146034	0.77808	0.79	0.858694	1	480	tags=32%, list=15%, signal=37%
HALLMARK_SPERMATOGENESIS%MSIGDB_C2%HALLMARK_SPERMATOGENESIS	HALLMARK_SPERMATOGENESIS%MSIGDB_C2%HALLMARK_SPERMATOGENESIS		25	0.135003	0.776009	0.828283	0.859088	1	2457	tags=96%, list=79%, signal=450%
CELLULAR RESPONSE TO NUTRIENT LEVELS%GOBP%GO:0031669	CELLULAR RESPONSE TO NUTRIENT LEVELS%GOBP%GO:0031669		29	0.139139	0.773322	0.791667	0.860248	1	758	tags=52%, list=24%, signal=68%
SMALL CELL LUNG CANCER%WIKIPATHWAYS_20200510%WP4658%HOMO SAPIENS	SMALL CELL LUNG CANCER%WIKIPATHWAYS_20200510%WP4658%HOMO SAPIENS		23	0.144578	0.768653	0.797468	0.864005	1	1866	tags=87%, list=60%, signal=215%
PEPTIDE TRANSPORT%GOBP%GO:0015833	PEPTIDE TRANSPORT%GOBP%GO:0015833		77	0.0832736	0.758809	0.933333	0.875698	1	2501	tags=95%, list=80%, signal=468%
REGULATION OF PATHWAY-RESTRICTED SMAD PROTEIN PHOSPHORYLATION%GOBP%GO:0060393	REGULATION OF PATHWAY-RESTRICTED SMAD PROTEIN PHOSPHORYLATION%GOBP%GO:0060393		16	0.163039	0.732221	0.82963	0.907825	1	2178	tags=94%, list=70%, signal=310%
ENDOTHELIAL CELL DIFFERENTIATION%GOBP%GO:0045446	ENDOTHELIAL CELL DIFFERENTIATION%GOBP%GO:0045446		22	0.138366	0.732165	0.877359	0.905154	1	2372	tags=95%, list=76%, signal=397%
CHORDATE EMBRYONIC DEVELOPMENT%GOBP%GO:0043009	CHORDATE EMBRYONIC DEVELOPMENT%GOBP%GO:0043009		32	0.11467	0.720649	0.9	0.91637	1	616	tags=41%, list=20%, signal=50%
POSITIVE REGULATION OF JNK CASCADE%GOBP%GO:0046330	POSITIVE REGULATION OF JNK CASCADE%GOBP%GO:0046330		23	0.128727	0.720449	0.879121	0.91378	1	467	tags=35%, list=15%, signal=41%
CILIUM ORGANIZATION%GOBP%GO:0044782	CILIUM ORGANIZATION%GOBP%GO:0044782		22	0.142071	0.718109	0.895349	0.913817	1	974	tags=68%, list=31%, signal=98%
CELLULAR RESPONSES TO EXTERNAL STIMULI%REACTOME%R-HSA-8953897.4	CELLULAR RESPONSES TO EXTERNAL STIMULI%REACTOME%R-HSA-8953897.4		54	0.0984825	0.715424	0.928571	0.914273	1	766	tags=44%, list=25%, signal=58%
ORGANELLE LOCALIZATION BY MEMBRANE TETHERING%GOBP%GO:0140056	ORGANELLE LOCALIZATION BY MEMBRANE TETHERING%GOBP%GO:0140056		15	0.155795	0.714426	0.854167	0.91252	1	781	tags=60%, list=25%, signal=80%
PROTEIN LOCALIZATION TO CELL PERIPHERY%GOBP%GO:1990778	PROTEIN LOCALIZATION TO CELL PERIPHERY%GOBP%GO:1990778		39	0.0955351	0.627467	0.96	0.986023	1	2262	tags=92%, list=73%, signal=332%
CORTICOTROPIN-RELEASING HORMONE SIGNALING PATHWAY%WIKIPATHWAYS_20200510%WP2355%HOMO SAPIENS	CORTICOTROPIN-RELEASING HORMONE SIGNALING PATHWAY%WIKIPATHWAYS_20200510%WP2355%HOMO SAPIENS		22	0.117535	0.616019	1	0.989681	1	191	tags=14%, list=6%, signal=14%
NON-INTEGRIN MEMBRANE-ECM INTERACTIONS%REACTOME DATABASE ID RELEASE 72%3000171	NON-INTEGRIN MEMBRANE-ECM INTERACTIONS%REACTOME DATABASE ID RELEASE 72%3000171		17	0.126992	0.589317	0.966667	0.998845	1	1727	tags=82%, list=55%, signal=184%
POSITIVE REGULATION OF STRESS-ACTIVATED MAPK CASCADE%GOBP%GO:0032874	POSITIVE REGULATION OF STRESS-ACTIVATED MAPK CASCADE%GOBP%GO:0032874		25	0.104532	0.586741	0.990476	0.996984	1	467	tags=32%, list=15%, signal=37%
POSITIVE REGULATION OF STRESS-ACTIVATED PROTEIN KINASE SIGNALING CASCADE%GOBP%GO:0070304	POSITIVE REGULATION OF STRESS-ACTIVATED PROTEIN KINASE SIGNALING CASCADE%GOBP%GO:0070304		25	0.104532	0.579833	1	0.996671	1	467	tags=32%, list=15%, signal=37%
CELLULAR NITROGEN COMPOUND BIOSYNTHETIC PROCESS%GOBP%GO:0044271	CELLULAR NITROGEN COMPOUND BIOSYNTHETIC PROCESS%GOBP%GO:0044271		123	0.0490423	0.566118	1	0.998251	1	495	tags=22%, list=16%, signal=25%
EPITHELIAL TO MESENCHYMAL TRANSITION IN COLORECTAL CANCER%WIKIPATHWAYS_20200510%WP4239%HOMO SAPIENS	EPITHELIAL TO MESENCHYMAL TRANSITION IN COLORECTAL CANCER%WIKIPATHWAYS_20200510%WP4239%HOMO SAPIENS		47	0.0765136	0.521706	1	1	1	343	tags=19%, list=11%, signal=21%
REGULATION OF FATTY ACID METABOLIC PROCESS%GOBP%GO:0019217	REGULATION OF FATTY ACID METABOLIC PROCESS%GOBP%GO:0019217		16	0.114802	0.514714	0.986014	1	1	2760	tags=100%, list=89%, signal=869%
NUCLEOBASE-CONTAINING COMPOUND BIOSYNTHETIC PROCESS%GOBP%GO:0034654	NUCLEOBASE-CONTAINING COMPOUND BIOSYNTHETIC PROCESS%GOBP%GO:0034654		96	0.0555995	0.504751	1	1	1	1915	tags=82%, list=61%, signal=207%
POSITIVE REGULATION OF PROTEIN CATABOLIC PROCESS%GOBP%GO:0045732	POSITIVE REGULATION OF PROTEIN CATABOLIC PROCESS%GOBP%GO:0045732		29	0.082238	0.487116	1	1	1	445	tags=24%, list=14%, signal=28%
HETEROCYCLE BIOSYNTHETIC PROCESS%GOBP%GO:0018130	HETEROCYCLE BIOSYNTHETIC PROCESS%GOBP%GO:0018130		98	0.0516533	0.454505	1	0.998937	1	1955	tags=83%, list=63%, signal=215%
DEVELOPMENTAL BIOLOGY%REACTOME DATABASE ID RELEASE 72%1266738	DEVELOPMENTAL BIOLOGY%REACTOME DATABASE ID RELEASE 72%1266738		175	0.176771			1	0	341	tags=25%, list=11%, signal=27%
HETEROCYCLE METABOLIC PROCESS%GOBP%GO:0046483	HETEROCYCLE METABOLIC PROCESS%GOBP%GO:0046483		193	0.0552438			1	0	790	tags=40%, list=25%, signal=51%
EPITHELIAL CELL DIFFERENTIATION%GOBP%GO:0030855	EPITHELIAL CELL DIFFERENTIATION%GOBP%GO:0030855		110	0.47666			1	0	570	tags=61%, list=18%, signal=72%

## Sheet: gsea_report_for_na_neg_tissues
NAME	GS<br> follow link to MSigDB	GS DETAILS	SIZE	ES	NES	NOM p-val	FDR q-val	FWER p-val	RANK AT MAX	LEADING EDGE
MUSCLE SYSTEM PROCESS%GOBP%GO:0003012	MUSCLE SYSTEM PROCESS%GOBP%GO:0003012	Details ...	97	-0.57857	-2.62004	0	0	0	405	tags=47%, list=13%, signal=53%
MUSCLE FILAMENT SLIDING%GOBP%GO:0030049	MUSCLE FILAMENT SLIDING%GOBP%GO:0030049	Details ...	24	-0.727617	-2.59014	0	0	0	331	tags=63%, list=11%, signal=69%
STRIATED MUSCLE CONTRACTION PATHWAY%WIKIPATHWAYS_20200510%WP383%HOMO SAPIENS	STRIATED MUSCLE CONTRACTION PATHWAY%WIKIPATHWAYS_20200510%WP383%HOMO SAPIENS	Details ...	25	-0.721824	-2.57112	0	0	0	331	tags=64%, list=11%, signal=71%
ACTIN-MYOSIN FILAMENT SLIDING%GOBP%GO:0033275	ACTIN-MYOSIN FILAMENT SLIDING%GOBP%GO:0033275	Details ...	24	-0.727617	-2.57042	0	0	0	331	tags=63%, list=11%, signal=69%
MUSCLE CONTRACTION%GOBP%GO:0006936	MUSCLE CONTRACTION%GOBP%GO:0006936	Details ...	87	-0.570257	-2.55326	0	0	0	405	tags=47%, list=13%, signal=53%
STRIATED MUSCLE CONTRACTION%REACTOME%R-HSA-390522.1	STRIATED MUSCLE CONTRACTION%REACTOME%R-HSA-390522.1	Details ...	21	-0.694309	-2.43971	0	0	0	331	tags=57%, list=11%, signal=64%
ACTIN-MEDIATED CELL CONTRACTION%GOBP%GO:0070252	ACTIN-MEDIATED CELL CONTRACTION%GOBP%GO:0070252	Details ...	38	-0.589109	-2.32213	0	8.75685e-05	0.001	378	tags=47%, list=12%, signal=53%
HEART CONTRACTION%GOBP%GO:0060047	HEART CONTRACTION%GOBP%GO:0060047	Details ...	32	-0.603732	-2.30518	0	7.96077e-05	0.001	405	tags=50%, list=13%, signal=57%
HEART PROCESS%GOBP%GO:0003015	HEART PROCESS%GOBP%GO:0003015	Details ...	36	-0.586373	-2.29677	0	7.29737e-05	0.001	405	tags=47%, list=13%, signal=54%
HALLMARK_MYOGENESIS%MSIGDB_C2%HALLMARK_MYOGENESIS	HALLMARK_MYOGENESIS%MSIGDB_C2%HALLMARK_MYOGENESIS	Details ...	93	-0.493771	-2.22245	0	0.000408196	0.006	400	tags=37%, list=13%, signal=41%
ACTIN FILAMENT-BASED MOVEMENT%GOBP%GO:0030048	ACTIN FILAMENT-BASED MOVEMENT%GOBP%GO:0030048	Details ...	48	-0.535443	-2.21267	0	0.000568488	0.009	385	tags=40%, list=12%, signal=44%
MUSCLE CONTRACTION%REACTOME DATABASE ID RELEASE 72%397014	MUSCLE CONTRACTION%REACTOME DATABASE ID RELEASE 72%397014	Details ...	75	-0.50756	-2.19868	0	0.000766173	0.013	426	tags=40%, list=14%, signal=45%
STRIATED MUSCLE CONTRACTION%GOBP%GO:0006941	STRIATED MUSCLE CONTRACTION%GOBP%GO:0006941	Details ...	40	-0.547899	-2.19426	0	0.000772779	0.014	405	tags=45%, list=13%, signal=51%
NICOTINIC ACETYLCHOLINE RECEPTOR SIGNALING PATHWAY%PANTHER PATHWAY%P00044	NICOTINIC ACETYLCHOLINE RECEPTOR SIGNALING PATHWAY%PANTHER PATHWAY%P00044	Details ...	21	-0.618704	-2.13832	0	0.00181364	0.035	490	tags=48%, list=16%, signal=56%
CLASS A 1 (RHODOPSIN-LIKE RECEPTORS)%REACTOME%R-HSA-373076.6	CLASS A 1 (RHODOPSIN-LIKE RECEPTORS)%REACTOME%R-HSA-373076.6	Details ...	76	-0.47973	-2.10599	0	0.00313312	0.063	995	tags=67%, list=32%, signal=96%
MYOFIBRIL ASSEMBLY%GOBP%GO:0030239	MYOFIBRIL ASSEMBLY%GOBP%GO:0030239	Details ...	28	-0.566027	-2.09267	0	0.00347698	0.074	274	tags=43%, list=9%, signal=47%
ALLOGRAFT REJECTION%WIKIPATHWAYS_20200510%WP2328%HOMO SAPIENS	ALLOGRAFT REJECTION%WIKIPATHWAYS_20200510%WP2328%HOMO SAPIENS	Details ...	31	-0.553391	-2.07133	0	0.0044487	0.096	930	tags=74%, list=30%, signal=105%
STRIATED MUSCLE CELL DIFFERENTIATION%GOBP%GO:0051146	STRIATED MUSCLE CELL DIFFERENTIATION%GOBP%GO:0051146	Details ...	41	-0.523752	-2.0704	0	0.00436295	0.099	666	tags=54%, list=21%, signal=67%
REGULATION OF ATPASE ACTIVITY%GOBP%GO:0043462	REGULATION OF ATPASE ACTIVITY%GOBP%GO:0043462	Details ...	15	-0.654828	-2.05655	0	0.00540715	0.126	619	tags=67%, list=20%, signal=83%
SKELETAL MUSCLE TISSUE DEVELOPMENT%GOBP%GO:0007519	SKELETAL MUSCLE TISSUE DEVELOPMENT%GOBP%GO:0007519	Details ...	16	-0.630972	-2.03403	0	0.00724111	0.169	239	tags=44%, list=8%, signal=47%
STRIATED MUSCLE CELL DEVELOPMENT%GOBP%GO:0055002	STRIATED MUSCLE CELL DEVELOPMENT%GOBP%GO:0055002		33	-0.535311	-2.02696	0	0.00774839	0.19	274	tags=39%, list=9%, signal=43%
CELLULAR CALCIUM ION HOMEOSTASIS%GOBP%GO:0006874	CELLULAR CALCIUM ION HOMEOSTASIS%GOBP%GO:0006874		95	-0.44708	-2.02654	0	0.00750921	0.19	1044	tags=60%, list=33%, signal=87%
PHOSPHOLIPASE C-ACTIVATING G PROTEIN-COUPLED RECEPTOR SIGNALING PATHWAY%GOBP%GO:0007200	PHOSPHOLIPASE C-ACTIVATING G PROTEIN-COUPLED RECEPTOR SIGNALING PATHWAY%GOBP%GO:0007200		24	-0.58127	-2.02274	0	0.00769503	0.2	613	tags=67%, list=20%, signal=82%
GPCR LIGAND BINDING%REACTOME DATABASE ID RELEASE 72%500792	GPCR LIGAND BINDING%REACTOME DATABASE ID RELEASE 72%500792		102	-0.45022	-2.01907	0	0.00773538	0.207	958	tags=61%, list=31%, signal=85%
SKELETAL MUSCLE ORGAN DEVELOPMENT%GOBP%GO:0060538	SKELETAL MUSCLE ORGAN DEVELOPMENT%GOBP%GO:0060538		16	-0.630972	-2.01831	0.00113636	0.00745911	0.207	239	tags=44%, list=8%, signal=47%
MUSCLE CELL DIFFERENTIATION%GOBP%GO:0042692	MUSCLE CELL DIFFERENTIATION%GOBP%GO:0042692		51	-0.48649	-2.01675	0	0.00738412	0.21	678	tags=49%, list=22%, signal=62%
REGULATION OF CALCIUM ION TRANSMEMBRANE TRANSPORT%GOBP%GO:1903169	REGULATION OF CALCIUM ION TRANSMEMBRANE TRANSPORT%GOBP%GO:1903169		33	-0.523383	-2.01191	0	0.00746144	0.217	795	tags=58%, list=26%, signal=76%
MUSCLE CELL DEVELOPMENT%GOBP%GO:0055001	MUSCLE CELL DEVELOPMENT%GOBP%GO:0055001		38	-0.509383	-2.01078	0	0.00724912	0.218	274	tags=37%, list=9%, signal=40%
ACTOMYOSIN STRUCTURE ORGANIZATION%GOBP%GO:0031032	ACTOMYOSIN STRUCTURE ORGANIZATION%GOBP%GO:0031032		34	-0.51417	-2.00732	0	0.00746231	0.231	274	tags=35%, list=9%, signal=38%
GPCRS, CLASS A RHODOPSIN-LIKE%WIKIPATHWAYS_20200510%WP455%HOMO SAPIENS	GPCRS, CLASS A RHODOPSIN-LIKE%WIKIPATHWAYS_20200510%WP455%HOMO SAPIENS		56	-0.475338	-2.00048	0	0.00787685	0.248	995	tags=66%, list=32%, signal=95%
REGULATION OF CALCIUM ION TRANSPORT%GOBP%GO:0051924	REGULATION OF CALCIUM ION TRANSPORT%GOBP%GO:0051924		49	-0.487079	-1.99661	0	0.00818987	0.265	994	tags=61%, list=32%, signal=88%
CARDIAC MUSCLE CONTRACTION%GOBP%GO:0060048	CARDIAC MUSCLE CONTRACTION%GOBP%GO:0060048		26	-0.542962	-1.99118	0	0.00845937	0.279	405	tags=46%, list=13%, signal=53%
REGULATION OF MUSCLE SYSTEM PROCESS%GOBP%GO:0090257	REGULATION OF MUSCLE SYSTEM PROCESS%GOBP%GO:0090257		58	-0.465206	-1.98199	0	0.00935059	0.313	405	tags=34%, list=13%, signal=39%
REGULATION OF CALCIUM ION TRANSMEMBRANE TRANSPORTER ACTIVITY%GOBP%GO:1901019	REGULATION OF CALCIUM ION TRANSMEMBRANE TRANSPORTER ACTIVITY%GOBP%GO:1901019		23	-0.564452	-1.96199	0	0.0120772	0.396	583	tags=52%, list=19%, signal=64%
CELLULAR COMPONENT ASSEMBLY INVOLVED IN MORPHOGENESIS%GOBP%GO:0010927	CELLULAR COMPONENT ASSEMBLY INVOLVED IN MORPHOGENESIS%GOBP%GO:0010927		33	-0.510137	-1.95793	0	0.012339	0.41	274	tags=36%, list=9%, signal=39%
IMMUNE RESPONSE-ACTIVATING CELL SURFACE RECEPTOR SIGNALING PATHWAY%GOBP%GO:0002429	IMMUNE RESPONSE-ACTIVATING CELL SURFACE RECEPTOR SIGNALING PATHWAY%GOBP%GO:0002429		74	-0.447236	-1.95563	0	0.0124969	0.421	991	tags=59%, list=32%, signal=85%
COMPLEMENT ACTIVATION%GOBP%GO:0006956	COMPLEMENT ACTIVATION%GOBP%GO:0006956		18	-0.593762	-1.95326	0	0.0124924	0.429	771	tags=72%, list=25%, signal=95%
REGULATION OF CYTOSOLIC CALCIUM ION CONCENTRATION%GOBP%GO:0051480	REGULATION OF CYTOSOLIC CALCIUM ION CONCENTRATION%GOBP%GO:0051480		78	-0.443877	-1.95082	0	0.0126386	0.441	1044	tags=60%, list=33%, signal=88%
CALCIUM ION HOMEOSTASIS%GOBP%GO:0055074	CALCIUM ION HOMEOSTASIS%GOBP%GO:0055074		97	-0.435759	-1.94921	0	0.0125054	0.443	1044	tags=59%, list=33%, signal=86%
IMMUNOGLOBULIN MEDIATED IMMUNE RESPONSE%GOBP%GO:0016064	IMMUNOGLOBULIN MEDIATED IMMUNE RESPONSE%GOBP%GO:0016064		17	-0.594687	-1.94443	0	0.0129527	0.461	955	tags=82%, list=31%, signal=118%
B CELL MEDIATED IMMUNITY%GOBP%GO:0019724	B CELL MEDIATED IMMUNITY%GOBP%GO:0019724		17	-0.594687	-1.93297	0.00114155	0.0146408	0.511	955	tags=82%, list=31%, signal=118%
MUSCLE ORGAN DEVELOPMENT%GOBP%GO:0007517	MUSCLE ORGAN DEVELOPMENT%GOBP%GO:0007517		61	-0.448561	-1.92666	0	0.0158433	0.553	400	tags=33%, list=13%, signal=37%
REGULATION OF CALCIUM ION TRANSPORT INTO CYTOSOL%GOBP%GO:0010522	REGULATION OF CALCIUM ION TRANSPORT INTO CYTOSOL%GOBP%GO:0010522		26	-0.526266	-1.91981	0	0.0168776	0.584	994	tags=65%, list=32%, signal=95%
SYSTEM PROCESS%GOBP%GO:0003008	SYSTEM PROCESS%GOBP%GO:0003008		262	-0.396778	-1.91731	0	0.016988	0.593	1312	tags=62%, list=42%, signal=98%
REGULATION OF MUSCLE CONTRACTION%GOBP%GO:0006937	REGULATION OF MUSCLE CONTRACTION%GOBP%GO:0006937		44	-0.468862	-1.91542	0	0.0169457	0.597	405	tags=36%, list=13%, signal=41%
IMMUNE RESPONSE-REGULATING CELL SURFACE RECEPTOR SIGNALING PATHWAY%GOBP%GO:0002768	IMMUNE RESPONSE-REGULATING CELL SURFACE RECEPTOR SIGNALING PATHWAY%GOBP%GO:0002768		80	-0.430234	-1.9106	0	0.0176248	0.62	991	tags=58%, list=32%, signal=82%
CELLULAR DIVALENT INORGANIC CATION HOMEOSTASIS%GOBP%GO:0072503	CELLULAR DIVALENT INORGANIC CATION HOMEOSTASIS%GOBP%GO:0072503		105	-0.426066	-1.90776	0	0.0180998	0.631	1053	tags=58%, list=34%, signal=85%
POSITIVE REGULATION OF CYTOSOLIC CALCIUM ION CONCENTRATION%GOBP%GO:0007204	POSITIVE REGULATION OF CYTOSOLIC CALCIUM ION CONCENTRATION%GOBP%GO:0007204		72	-0.437417	-1.90612	0	0.0182803	0.639	1044	tags=60%, list=33%, signal=88%
MUSCLE STRUCTURE DEVELOPMENT%GOBP%GO:0061061	MUSCLE STRUCTURE DEVELOPMENT%GOBP%GO:0061061		96	-0.420473	-1.89728	0	0.0199105	0.681	405	tags=32%, list=13%, signal=36%
POSITIVE REGULATION OF LEUKOCYTE CHEMOTAXIS%GOBP%GO:0002690	POSITIVE REGULATION OF LEUKOCYTE CHEMOTAXIS%GOBP%GO:0002690		20	-0.546672	-1.89375	0.00113122	0.0202004	0.692	390	tags=50%, list=13%, signal=57%
COMPLEMENT CASCADE%REACTOME%R-HSA-166658.2	COMPLEMENT CASCADE%REACTOME%R-HSA-166658.2		20	-0.552385	-1.89333	0.00342857	0.0198917	0.692	771	tags=65%, list=25%, signal=86%
TCR SIGNALING%REACTOME DATABASE ID RELEASE 72%202403	TCR SIGNALING%REACTOME DATABASE ID RELEASE 72%202403		18	-0.568002	-1.89299	0.00229885	0.0196579	0.693	1061	tags=83%, list=34%, signal=126%
NEGATIVE REGULATION OF TRANSPORTER ACTIVITY%GOBP%GO:0032410	NEGATIVE REGULATION OF TRANSPORTER ACTIVITY%GOBP%GO:0032410		15	-0.605858	-1.8922	0	0.0195282	0.696	171	tags=40%, list=5%, signal=42%
ACTIN FILAMENT-BASED PROCESS%GOBP%GO:0030029	ACTIN FILAMENT-BASED PROCESS%GOBP%GO:0030029		146	-0.402541	-1.89078	0	0.019649	0.705	587	tags=34%, list=19%, signal=40%
STRIATED MUSCLE TISSUE DEVELOPMENT%GOBP%GO:0014706	STRIATED MUSCLE TISSUE DEVELOPMENT%GOBP%GO:0014706		51	-0.462618	-1.88882	0	0.0198427	0.715	239	tags=29%, list=8%, signal=31%
MUSCLE TISSUE DEVELOPMENT%GOBP%GO:0060537	MUSCLE TISSUE DEVELOPMENT%GOBP%GO:0060537		54	-0.449699	-1.88363	0	0.0207907	0.746	405	tags=33%, list=13%, signal=38%
NEURONAL SYSTEM%REACTOME DATABASE ID RELEASE 72%112316	NEURONAL SYSTEM%REACTOME DATABASE ID RELEASE 72%112316		85	-0.422834	-1.88277	0	0.0207669	0.751	1238	tags=66%, list=40%, signal=106%
G PROTEIN-COUPLED RECEPTOR SIGNALING PATHWAY, COUPLED TO CYCLIC NUCLEOTIDE SECOND MESSENGER%GOBP%GO:0007187	G PROTEIN-COUPLED RECEPTOR SIGNALING PATHWAY, COUPLED TO CYCLIC NUCLEOTIDE SECOND MESSENGER%GOBP%GO:0007187		58	-0.445886	-1.87717	0	0.0217262	0.77	1127	tags=66%, list=36%, signal=101%
REGULATION OF INFLAMMATORY RESPONSE%GOBP%GO:0050727	REGULATION OF INFLAMMATORY RESPONSE%GOBP%GO:0050727		76	-0.421595	-1.87583	0	0.0216885	0.778	1287	tags=66%, list=41%, signal=109%
REGULATION OF LYMPHOCYTE PROLIFERATION%GOBP%GO:0050670	REGULATION OF LYMPHOCYTE PROLIFERATION%GOBP%GO:0050670		48	-0.45255	-1.87234	0	0.0222819	0.794	792	tags=52%, list=25%, signal=69%
MUSCULOSKELETAL MOVEMENT%GOBP%GO:0050881	MUSCULOSKELETAL MOVEMENT%GOBP%GO:0050881		15	-0.589076	-1.87016	0.00232288	0.0226766	0.805	483	tags=53%, list=15%, signal=63%
MULTICELLULAR ORGANISMAL MOVEMENT%GOBP%GO:0050879	MULTICELLULAR ORGANISMAL MOVEMENT%GOBP%GO:0050879		15	-0.589076	-1.86645	0.00116144	0.0232634	0.822	483	tags=53%, list=15%, signal=63%
DIVALENT INORGANIC CATION HOMEOSTASIS%GOBP%GO:0072507	DIVALENT INORGANIC CATION HOMEOSTASIS%GOBP%GO:0072507		108	-0.411614	-1.86552	0	0.023179	0.824	1053	tags=56%, list=34%, signal=82%
POSITIVE REGULATION OF CELL ACTIVATION%GOBP%GO:0050867	POSITIVE REGULATION OF CELL ACTIVATION%GOBP%GO:0050867		67	-0.432219	-1.86545	0	0.022833	0.824	1035	tags=58%, list=33%, signal=85%
CIRCULATORY SYSTEM PROCESS%GOBP%GO:0003013	CIRCULATORY SYSTEM PROCESS%GOBP%GO:0003013		98	-0.41214	-1.86246	0	0.0234562	0.839	1339	tags=68%, list=43%, signal=116%
CYTOSKELETAL REGULATION BY RHO GTPASE%PANTHER PATHWAY%P00016	CYTOSKELETAL REGULATION BY RHO GTPASE%PANTHER PATHWAY%P00016		16	-0.576819	-1.86208	0.0022779	0.0232061	0.839	400	tags=44%, list=13%, signal=50%
REGULATION OF MONONUCLEAR CELL PROLIFERATION%GOBP%GO:0032944	REGULATION OF MONONUCLEAR CELL PROLIFERATION%GOBP%GO:0032944		48	-0.45255	-1.85945	0.00104493	0.0234784	0.849	792	tags=52%, list=25%, signal=69%
RECEPTOR-MEDIATED ENDOCYTOSIS%GOBP%GO:0006898	RECEPTOR-MEDIATED ENDOCYTOSIS%GOBP%GO:0006898		46	-0.458497	-1.85773	0	0.0236692	0.852	1035	tags=59%, list=33%, signal=87%
INFLAMMATORY RESPONSE%GOBP%GO:0006954	INFLAMMATORY RESPONSE%GOBP%GO:0006954		87	-0.411192	-1.85382	0	0.0243553	0.864	1042	tags=57%, list=33%, signal=84%
BLOOD CIRCULATION%GOBP%GO:0008015	BLOOD CIRCULATION%GOBP%GO:0008015		96	-0.410314	-1.84859	0	0.0255563	0.879	624	tags=40%, list=20%, signal=48%
ADENYLATE CYCLASE-ACTIVATING G PROTEIN-COUPLED RECEPTOR SIGNALING PATHWAY%GOBP%GO:0007189	ADENYLATE CYCLASE-ACTIVATING G PROTEIN-COUPLED RECEPTOR SIGNALING PATHWAY%GOBP%GO:0007189		35	-0.477235	-1.84464	0	0.02626	0.891	1086	tags=69%, list=35%, signal=104%
REGULATION OF ION TRANSPORT%GOBP%GO:0043269	REGULATION OF ION TRANSPORT%GOBP%GO:0043269		100	-0.40331	-1.84377	0	0.0260743	0.893	994	tags=53%, list=32%, signal=75%
REGULATION OF CALCIUM-MEDIATED SIGNALING%GOBP%GO:0050848	REGULATION OF CALCIUM-MEDIATED SIGNALING%GOBP%GO:0050848		27	-0.502277	-1.83863	0.00107181	0.0272947	0.906	724	tags=48%, list=23%, signal=62%
GENERATION OF SECOND MESSENGER MOLECULES%REACTOME DATABASE ID RELEASE 72%202433	GENERATION OF SECOND MESSENGER MOLECULES%REACTOME DATABASE ID RELEASE 72%202433		17	-0.561264	-1.83629	0.00232019	0.0276613	0.914	1061	tags=82%, list=34%, signal=124%
ENDOCYTOSIS%GOBP%GO:0006897	ENDOCYTOSIS%GOBP%GO:0006897		102	-0.404192	-1.83272	0	0.0284009	0.922	1035	tags=50%, list=33%, signal=72%
NEGATIVE REGULATION OF ION TRANSMEMBRANE TRANSPORT%GOBP%GO:0034766	NEGATIVE REGULATION OF ION TRANSMEMBRANE TRANSPORT%GOBP%GO:0034766		17	-0.563173	-1.82582	0.00115075	0.0303945	0.946	171	tags=35%, list=5%, signal=37%
REGULATION OF LEUKOCYTE PROLIFERATION%GOBP%GO:0070663	REGULATION OF LEUKOCYTE PROLIFERATION%GOBP%GO:0070663		51	-0.441192	-1.82579	0	0.0300256	0.946	792	tags=51%, list=25%, signal=67%
POSITIVE REGULATION OF LEUKOCYTE ACTIVATION%GOBP%GO:0002696	POSITIVE REGULATION OF LEUKOCYTE ACTIVATION%GOBP%GO:0002696		64	-0.424577	-1.82459	0	0.0300249	0.946	1035	tags=58%, list=33%, signal=85%
REGULATION OF RELEASE OF SEQUESTERED CALCIUM ION INTO CYTOSOL%GOBP%GO:0051279	REGULATION OF RELEASE OF SEQUESTERED CALCIUM ION INTO CYTOSOL%GOBP%GO:0051279		22	-0.516861	-1.82444	0.00336323	0.0297017	0.946	994	tags=64%, list=32%, signal=93%
POSITIVE REGULATION OF CALCIUM ION TRANSPORT%GOBP%GO:0051928	POSITIVE REGULATION OF CALCIUM ION TRANSPORT%GOBP%GO:0051928		27	-0.492949	-1.82187	0.00107527	0.0301608	0.949	994	tags=63%, list=32%, signal=92%
ADENYLATE CYCLASE-MODULATING G PROTEIN-COUPLED RECEPTOR SIGNALING PATHWAY%GOBP%GO:0007188	ADENYLATE CYCLASE-MODULATING G PROTEIN-COUPLED RECEPTOR SIGNALING PATHWAY%GOBP%GO:0007188		49	-0.443671	-1.82081	0.0010352	0.0302837	0.953	1086	tags=63%, list=35%, signal=96%
NEGATIVE REGULATION OF CATION TRANSMEMBRANE TRANSPORT%GOBP%GO:1904063	NEGATIVE REGULATION OF CATION TRANSMEMBRANE TRANSPORT%GOBP%GO:1904063		17	-0.563173	-1.82062	0.00114155	0.0299378	0.953	171	tags=35%, list=5%, signal=37%
PEPTIDE LIGAND-BINDING RECEPTORS%REACTOME%R-HSA-375276.5	PEPTIDE LIGAND-BINDING RECEPTORS%REACTOME%R-HSA-375276.5		46	-0.447897	-1.8151	0.00416667	0.0316785	0.964	958	tags=63%, list=31%, signal=90%
CELLULAR METAL ION HOMEOSTASIS%GOBP%GO:0006875	CELLULAR METAL ION HOMEOSTASIS%GOBP%GO:0006875		114	-0.397748	-1.81403	0	0.0316482	0.965	1053	tags=54%, list=34%, signal=79%
ION HOMEOSTASIS%REACTOME DATABASE ID RELEASE 72%5578775	ION HOMEOSTASIS%REACTOME DATABASE ID RELEASE 72%5578775		15	-0.568494	-1.81318	0.00350877	0.0315485	0.966	160	tags=33%, list=5%, signal=35%
REGULATION OF HEART CONTRACTION%GOBP%GO:0008016	REGULATION OF HEART CONTRACTION%GOBP%GO:0008016		69	-0.415925	-1.81076	0.00102354	0.0321048	0.967	415	tags=29%, list=13%, signal=33%
ADAPTIVE IMMUNE RESPONSE BASED ON SOMATIC RECOMBINATION OF IMMUNE RECEPTORS BUILT FROM IMMUNOGLOBULIN SUPERFAMILY DOMAINS%GOBP%GO:0002460	ADAPTIVE IMMUNE RESPONSE BASED ON SOMATIC RECOMBINATION OF IMMUNE RECEPTORS BUILT FROM IMMUNOGLOBULIN SUPERFAMILY DOMAINS%GOBP%GO:0002460		34	-0.466299	-1.80669	0.0031679	0.0333342	0.974	1150	tags=68%, list=37%, signal=106%
POSITIVE REGULATION OF MUSCLE CELL DIFFERENTIATION%GOBP%GO:0051149	POSITIVE REGULATION OF MUSCLE CELL DIFFERENTIATION%GOBP%GO:0051149		17	-0.548426	-1.79815	0.00230415	0.0361353	0.981	818	tags=59%, list=26%, signal=79%
ACTION POTENTIAL%GOBP%GO:0001508	ACTION POTENTIAL%GOBP%GO:0001508		23	-0.517397	-1.79773	0.00561798	0.0359149	0.981	1155	tags=78%, list=37%, signal=123%
METAL ION TRANSPORT%GOBP%GO:0030001	METAL ION TRANSPORT%GOBP%GO:0030001		91	-0.398701	-1.79727	0	0.0357089	0.982	1141	tags=58%, list=37%, signal=89%
TYROBP CAUSAL NETWORK%WIKIPATHWAYS_20200510%WP3945%HOMO SAPIENS	TYROBP CAUSAL NETWORK%WIKIPATHWAYS_20200510%WP3945%HOMO SAPIENS		31	-0.473745	-1.79359	0.00323625	0.0366695	0.983	1035	tags=65%, list=33%, signal=96%
REGULATION OF T CELL PROLIFERATION%GOBP%GO:0042129	REGULATION OF T CELL PROLIFERATION%GOBP%GO:0042129		29	-0.476183	-1.79015	0.00436205	0.0376374	0.987	778	tags=52%, list=25%, signal=68%
IMPORT INTO CELL%GOBP%GO:0098657	IMPORT INTO CELL%GOBP%GO:0098657		127	-0.387634	-1.78602	0	0.0388227	0.99	1118	tags=51%, list=36%, signal=77%
CAMP-MEDIATED SIGNALING%GOBP%GO:0019933	CAMP-MEDIATED SIGNALING%GOBP%GO:0019933		40	-0.445484	-1.78224	0.00210748	0.0399298	0.992	1318	tags=73%, list=42%, signal=124%
REGULATION OF SYSTEM PROCESS%GOBP%GO:0044057	REGULATION OF SYSTEM PROCESS%GOBP%GO:0044057		137	-0.383647	-1.78147	0	0.039837	0.992	786	tags=41%, list=25%, signal=52%
ANTI-INFLAMMATORY RESPONSE FAVOURING LEISHMANIA PARASITE INFECTION%REACTOME%R-HSA-9662851.1	ANTI-INFLAMMATORY RESPONSE FAVOURING LEISHMANIA PARASITE INFECTION%REACTOME%R-HSA-9662851.1		50	-0.427855	-1.77887	0.00102775	0.0405107	0.994	1286	tags=70%, list=41%, signal=117%
LEISHMANIA PARASITE GROWTH AND SURVIVAL%REACTOME DATABASE ID RELEASE 72%9664433	LEISHMANIA PARASITE GROWTH AND SURVIVAL%REACTOME DATABASE ID RELEASE 72%9664433		50	-0.427855	-1.77683	0.00103627	0.0410491	0.994	1286	tags=70%, list=41%, signal=117%
REGULATION OF ACUTE INFLAMMATORY RESPONSE%GOBP%GO:0002673	REGULATION OF ACUTE INFLAMMATORY RESPONSE%GOBP%GO:0002673		30	-0.472562	-1.77256	0.00213904	0.0425802	0.995	1287	tags=73%, list=41%, signal=124%
ADAPTIVE IMMUNE RESPONSE%GOBP%GO:0002250	ADAPTIVE IMMUNE RESPONSE%GOBP%GO:0002250		42	-0.4441	-1.77212	0	0.042439	0.995	1009	tags=60%, list=32%, signal=87%
BINDING AND UPTAKE OF LIGANDS BY SCAVENGER RECEPTORS%REACTOME%R-HSA-2173782.1	BINDING AND UPTAKE OF LIGANDS BY SCAVENGER RECEPTORS%REACTOME%R-HSA-2173782.1		23	-0.514113	-1.77158	0.00328228	0.0423349	0.995	1118	tags=74%, list=36%, signal=114%
NEGATIVE REGULATION OF ION TRANSPORT%GOBP%GO:0043271	NEGATIVE REGULATION OF ION TRANSPORT%GOBP%GO:0043271		22	-0.507599	-1.76934	0.00563698	0.0428863	0.995	200	tags=32%, list=6%, signal=34%
POSITIVE REGULATION OF LEUKOCYTE CELL-CELL ADHESION%GOBP%GO:1903039	POSITIVE REGULATION OF LEUKOCYTE CELL-CELL ADHESION%GOBP%GO:1903039		44	-0.438458	-1.76838	0.00418848	0.0429389	0.995	998	tags=57%, list=32%, signal=82%
REGULATION OF METAL ION TRANSPORT%GOBP%GO:0010959	REGULATION OF METAL ION TRANSPORT%GOBP%GO:0010959		71	-0.404929	-1.76777	0.00101729	0.0428334	0.995	1141	tags=58%, list=37%, signal=89%
POSITIVE REGULATION OF LYMPHOCYTE ACTIVATION%GOBP%GO:0051251	POSITIVE REGULATION OF LYMPHOCYTE ACTIVATION%GOBP%GO:0051251		55	-0.418177	-1.76732	0	0.042647	0.995	998	tags=55%, list=32%, signal=79%
POTASSIUM ION TRANSPORT%GOBP%GO:0006813	POTASSIUM ION TRANSPORT%GOBP%GO:0006813		26	-0.481717	-1.76685	0.00650759	0.0424645	0.996	1457	tags=85%, list=47%, signal=158%
POSITIVE REGULATION OF IMMUNE SYSTEM PROCESS%GOBP%GO:0002684	POSITIVE REGULATION OF IMMUNE SYSTEM PROCESS%GOBP%GO:0002684		207	-0.368364	-1.76186	0	0.0442571	0.997	1009	tags=50%, list=32%, signal=69%
FC RECEPTOR MEDIATED STIMULATORY SIGNALING PATHWAY%GOBP%GO:0002431	FC RECEPTOR MEDIATED STIMULATORY SIGNALING PATHWAY%GOBP%GO:0002431		23	-0.497289	-1.76157	0.00656455	0.0439906	0.997	955	tags=61%, list=31%, signal=87%
METAL ION HOMEOSTASIS%GOBP%GO:0055065	METAL ION HOMEOSTASIS%GOBP%GO:0055065		119	-0.376344	-1.75432	0	0.0468472	0.999	1101	tags=54%, list=35%, signal=80%
MICROGLIA PATHOGEN PHAGOCYTOSIS PATHWAY%WIKIPATHWAYS_20200510%WP3937%HOMO SAPIENS	MICROGLIA PATHOGEN PHAGOCYTOSIS PATHWAY%WIKIPATHWAYS_20200510%WP3937%HOMO SAPIENS		15	-0.557594	-1.75336	0.00934579	0.0469409	0.999	1035	tags=73%, list=33%, signal=109%
POSITIVE REGULATION OF CALCIUM ION TRANSMEMBRANE TRANSPORT%GOBP%GO:1904427	POSITIVE REGULATION OF CALCIUM ION TRANSMEMBRANE TRANSPORT%GOBP%GO:1904427		17	-0.532675	-1.75331	0.00465116	0.0465567	0.999	626	tags=53%, list=20%, signal=66%
CHEMICAL SYNAPTIC TRANSMISSION%GOBP%GO:0007268	CHEMICAL SYNAPTIC TRANSMISSION%GOBP%GO:0007268		64	-0.402969	-1.75307	0.00102354	0.0462643	0.999	1174	tags=61%, list=38%, signal=96%
REGULATION OF PROTEIN PROCESSING%GOBP%GO:0070613	REGULATION OF PROTEIN PROCESSING%GOBP%GO:0070613		28	-0.471636	-1.75259	0.00652884	0.0461603	0.999	1287	tags=75%, list=41%, signal=127%
NABA_PROTEOGLYCANS%MSIGDB_C2%NABA_PROTEOGLYCANS	NABA_PROTEOGLYCANS%MSIGDB_C2%NABA_PROTEOGLYCANS		16	-0.543543	-1.74707	0.0102623	0.0486175	1	854	tags=69%, list=27%, signal=94%
POSITIVE REGULATION OF LEUKOCYTE MIGRATION%GOBP%GO:0002687	POSITIVE REGULATION OF LEUKOCYTE MIGRATION%GOBP%GO:0002687		29	-0.471133	-1.74592	0.00643087	0.048744	1	390	tags=41%, list=13%, signal=47%
REGULATION OF PROTEIN ACTIVATION CASCADE%GOBP%GO:2000257	REGULATION OF PROTEIN ACTIVATION CASCADE%GOBP%GO:2000257		20	-0.504754	-1.74574	0.0127021	0.0484279	1	1287	tags=80%, list=41%, signal=135%
REGULATION OF LYMPHOCYTE ACTIVATION%GOBP%GO:0051249	REGULATION OF LYMPHOCYTE ACTIVATION%GOBP%GO:0051249		83	-0.395118	-1.74472	0.00100806	0.0485614	1	1256	tags=63%, list=40%, signal=102%
NCAM1 INTERACTIONS%REACTOME%R-HSA-419037.1	NCAM1 INTERACTIONS%REACTOME%R-HSA-419037.1		15	-0.561573	-1.74096	0.00700117	0.0497942	1	1376	tags=100%, list=44%, signal=178%
REGULATION OF COMPLEMENT ACTIVATION%GOBP%GO:0030449	REGULATION OF COMPLEMENT ACTIVATION%GOBP%GO:0030449		20	-0.504754	-1.73581	0.010101	0.0521353	1	1287	tags=80%, list=41%, signal=135%
CELLULAR CATION HOMEOSTASIS%GOBP%GO:0030003	CELLULAR CATION HOMEOSTASIS%GOBP%GO:0030003		118	-0.381109	-1.73547	0	0.0519682	1	1053	tags=53%, list=34%, signal=76%
REGULATION OF LEUKOCYTE CELL-CELL ADHESION%GOBP%GO:1903037	REGULATION OF LEUKOCYTE CELL-CELL ADHESION%GOBP%GO:1903037		58	-0.409749	-1.7349	0.00101626	0.0518971	1	998	tags=53%, list=32%, signal=77%
ANTEROGRADE TRANS-SYNAPTIC SIGNALING%GOBP%GO:0098916	ANTEROGRADE TRANS-SYNAPTIC SIGNALING%GOBP%GO:0098916		64	-0.402969	-1.73459	0	0.0515851	1	1174	tags=61%, list=38%, signal=96%
CYCLIC-NUCLEOTIDE-MEDIATED SIGNALING%GOBP%GO:0019935	CYCLIC-NUCLEOTIDE-MEDIATED SIGNALING%GOBP%GO:0019935		44	-0.429	-1.73333	0.00312826	0.0517648	1	1318	tags=70%, list=42%, signal=120%
HEART DEVELOPMENT%GOBP%GO:0007507	HEART DEVELOPMENT%GOBP%GO:0007507		84	-0.389735	-1.73262	0	0.0517388	1	1501	tags=73%, list=48%, signal=136%
FATTY ACID DERIVATIVE BIOSYNTHETIC PROCESS%GOBP%GO:1901570	FATTY ACID DERIVATIVE BIOSYNTHETIC PROCESS%GOBP%GO:1901570		18	-0.517122	-1.73018	0.00574713	0.0527326	1	223	tags=33%, list=7%, signal=36%
POTASSIUM CHANNELS%REACTOME DATABASE ID RELEASE 72%1296071	POTASSIUM CHANNELS%REACTOME DATABASE ID RELEASE 72%1296071		24	-0.495366	-1.72962	0.00439078	0.0527066	1	1429	tags=88%, list=46%, signal=160%
REGULATION OF PROTEIN MATURATION%GOBP%GO:1903317	REGULATION OF PROTEIN MATURATION%GOBP%GO:1903317		29	-0.459233	-1.72773	0.00760043	0.0533356	1	1287	tags=72%, list=41%, signal=122%
REGULATION OF SYSTEMIC ARTERIAL BLOOD PRESSURE%GOBP%GO:0003073	REGULATION OF SYSTEMIC ARTERIAL BLOOD PRESSURE%GOBP%GO:0003073		27	-0.471674	-1.72506	0.00647948	0.0544029	1	614	tags=48%, list=20%, signal=59%
NEGATIVE REGULATION OF TRANSMEMBRANE TRANSPORT%GOBP%GO:0034763	NEGATIVE REGULATION OF TRANSMEMBRANE TRANSPORT%GOBP%GO:0034763		20	-0.503624	-1.72145	0.0100334	0.055952	1	171	tags=30%, list=5%, signal=32%
REGULATION OF LEUKOCYTE ACTIVATION%GOBP%GO:0002694	REGULATION OF LEUKOCYTE ACTIVATION%GOBP%GO:0002694		102	-0.383411	-1.72025	0.00100604	0.0562022	1	1270	tags=62%, list=41%, signal=101%
HETEROTRIMERIC G-PROTEIN SIGNALING PATHWAY-GI ALPHA AND GS ALPHA MEDIATED PATHWAY%PANTHER PATHWAY%P00026	HETEROTRIMERIC G-PROTEIN SIGNALING PATHWAY-GI ALPHA AND GS ALPHA MEDIATED PATHWAY%PANTHER PATHWAY%P00026		35	-0.4385	-1.71758	0.0118153	0.0572962	1	1236	tags=69%, list=40%, signal=112%
REGULATION OF HUMORAL IMMUNE RESPONSE%GOBP%GO:0002920	REGULATION OF HUMORAL IMMUNE RESPONSE%GOBP%GO:0002920		25	-0.468209	-1.71244	0.00657895	0.0595978	1	191	tags=36%, list=6%, signal=38%
FC-GAMMA RECEPTOR SIGNALING PATHWAY%GOBP%GO:0038094	FC-GAMMA RECEPTOR SIGNALING PATHWAY%GOBP%GO:0038094		22	-0.485551	-1.71019	0.00777778	0.0606825	1	955	tags=59%, list=31%, signal=85%
REGULATION OF CATION TRANSMEMBRANE TRANSPORT%GOBP%GO:1904062	REGULATION OF CATION TRANSMEMBRANE TRANSPORT%GOBP%GO:1904062		65	-0.393659	-1.70619	0.0040858	0.0627179	1	1265	tags=62%, list=41%, signal=101%
MONOVALENT INORGANIC CATION TRANSPORT%GOBP%GO:0015672	MONOVALENT INORGANIC CATION TRANSPORT%GOBP%GO:0015672		36	-0.440658	-1.70534	0.0053135	0.0627234	1	1492	tags=81%, list=48%, signal=153%
PHAGOCYTOSIS%GOBP%GO:0006909	PHAGOCYTOSIS%GOBP%GO:0006909		47	-0.416456	-1.70344	0.00421053	0.0634562	1	1035	tags=53%, list=33%, signal=78%
REGULATION OF SEQUESTERING OF CALCIUM ION%GOBP%GO:0051282	REGULATION OF SEQUESTERING OF CALCIUM ION%GOBP%GO:0051282		38	-0.429303	-1.70224	0.00628272	0.063665	1	1044	tags=55%, list=33%, signal=82%
REGULATION OF COMPLEMENT CASCADE%REACTOME%R-HSA-977606.5	REGULATION OF COMPLEMENT CASCADE%REACTOME%R-HSA-977606.5		17	-0.514827	-1.70144	0.014977	0.0636817	1	1287	tags=82%, list=41%, signal=140%
TRANS-SYNAPTIC SIGNALING%GOBP%GO:0099537	TRANS-SYNAPTIC SIGNALING%GOBP%GO:0099537		66	-0.39882	-1.70056	0.00101523	0.0636986	1	1174	tags=61%, list=38%, signal=95%
SECOND-MESSENGER-MEDIATED SIGNALING%GOBP%GO:0019932	SECOND-MESSENGER-MEDIATED SIGNALING%GOBP%GO:0019932		84	-0.386813	-1.70054	0	0.06325	1	995	tags=55%, list=32%, signal=78%
MULTICELLULAR ORGANISMAL SIGNALING%GOBP%GO:0035637	MULTICELLULAR ORGANISMAL SIGNALING%GOBP%GO:0035637		38	-0.433484	-1.69813	0.00738397	0.0643106	1	1155	tags=63%, list=37%, signal=99%
CELLULAR ION HOMEOSTASIS%GOBP%GO:0006873	CELLULAR ION HOMEOSTASIS%GOBP%GO:0006873		121	-0.368637	-1.69606	0	0.065235	1	1053	tags=51%, list=34%, signal=74%
CHEMOKINE RECEPTORS BIND CHEMOKINES%REACTOME%R-HSA-380108.3	CHEMOKINE RECEPTORS BIND CHEMOKINES%REACTOME%R-HSA-380108.3		15	-0.526425	-1.69594	0.00934579	0.0648885	1	1383	tags=93%, list=44%, signal=167%
HUMORAL IMMUNE RESPONSE%GOBP%GO:0006959	HUMORAL IMMUNE RESPONSE%GOBP%GO:0006959		58	-0.403646	-1.69208	0.00306748	0.0665562	1	958	tags=62%, list=31%, signal=88%
REGULATION OF B CELL ACTIVATION%GOBP%GO:0050864	REGULATION OF B CELL ACTIVATION%GOBP%GO:0050864		29	-0.456655	-1.68893	0.005291	0.0680759	1	1233	tags=72%, list=40%, signal=119%
CALCIUM ION TRANSPORT INTO CYTOSOL%GOBP%GO:0060402	CALCIUM ION TRANSPORT INTO CYTOSOL%GOBP%GO:0060402		27	-0.462919	-1.68481	0.00537057	0.0704435	1	588	tags=44%, list=19%, signal=54%
CARDIAC MUSCLE CELL DIFFERENTIATION%GOBP%GO:0055007	CARDIAC MUSCLE CELL DIFFERENTIATION%GOBP%GO:0055007		15	-0.539561	-1.68314	0.011655	0.0710705	1	178	tags=33%, list=6%, signal=35%
NCAM SIGNALING FOR NEURITE OUT-GROWTH%REACTOME DATABASE ID RELEASE 72%375165	NCAM SIGNALING FOR NEURITE OUT-GROWTH%REACTOME DATABASE ID RELEASE 72%375165		16	-0.523859	-1.6824	0.0233918	0.0710549	1	1376	tags=94%, list=44%, signal=167%
G ALPHA (S) SIGNALLING EVENTS%REACTOME DATABASE ID RELEASE 72%418555	G ALPHA (S) SIGNALLING EVENTS%REACTOME DATABASE ID RELEASE 72%418555		49	-0.406884	-1.68143	0.00411523	0.0711563	1	1286	tags=67%, list=41%, signal=113%
REGULATION OF CELL ACTIVATION%GOBP%GO:0050865	REGULATION OF CELL ACTIVATION%GOBP%GO:0050865		113	-0.367569	-1.67956	0	0.0720272	1	1380	tags=64%, list=44%, signal=110%
REGULATION OF MYELOID CELL DIFFERENTIATION%GOBP%GO:0045637	REGULATION OF MYELOID CELL DIFFERENTIATION%GOBP%GO:0045637		32	-0.444244	-1.67645	0.0137276	0.0737899	1	1080	tags=59%, list=35%, signal=90%
CELLULAR POTASSIUM ION TRANSPORT%GOBP%GO:0071804	CELLULAR POTASSIUM ION TRANSPORT%GOBP%GO:0071804		22	-0.467752	-1.67464	0.0132013	0.0745291	1	1457	tags=82%, list=47%, signal=153%
INORGANIC ION TRANSMEMBRANE TRANSPORT%GOBP%GO:0098660	INORGANIC ION TRANSMEMBRANE TRANSPORT%GOBP%GO:0098660		72	-0.388241	-1.67394	0.00101215	0.0745141	1	1542	tags=74%, list=49%, signal=142%
INORGANIC CATION TRANSMEMBRANE TRANSPORT%GOBP%GO:0098662	INORGANIC CATION TRANSMEMBRANE TRANSPORT%GOBP%GO:0098662		64	-0.384689	-1.67375	0.00410678	0.0741776	1	1542	tags=73%, list=49%, signal=142%
POSITIVE REGULATION OF ION TRANSPORT%GOBP%GO:0043270	POSITIVE REGULATION OF ION TRANSPORT%GOBP%GO:0043270		51	-0.407625	-1.67331	0.00103842	0.0739801	1	994	tags=53%, list=32%, signal=76%
POSITIVE REGULATION OF T CELL ACTIVATION%GOBP%GO:0050870	POSITIVE REGULATION OF T CELL ACTIVATION%GOBP%GO:0050870		38	-0.425135	-1.67328	0.00628272	0.0735286	1	998	tags=55%, list=32%, signal=80%
CALCIUM ION TRANSPORT%GOBP%GO:0006816	CALCIUM ION TRANSPORT%GOBP%GO:0006816		52	-0.393868	-1.67199	0.00720906	0.0739192	1	1044	tags=54%, list=33%, signal=80%
NEGATIVE REGULATION OF INFLAMMATORY RESPONSE%GOBP%GO:0050728	NEGATIVE REGULATION OF INFLAMMATORY RESPONSE%GOBP%GO:0050728		26	-0.451888	-1.67174	0.0153005	0.0736336	1	1270	tags=65%, list=41%, signal=109%
REGULATION OF ION TRANSMEMBRANE TRANSPORT%GOBP%GO:0034765	REGULATION OF ION TRANSMEMBRANE TRANSPORT%GOBP%GO:0034765		71	-0.383932	-1.66942	0.00308325	0.0746045	1	1265	tags=61%, list=41%, signal=100%
PEPTIDE HORMONE METABOLISM%REACTOME DATABASE ID RELEASE 72%2980736	PEPTIDE HORMONE METABOLISM%REACTOME DATABASE ID RELEASE 72%2980736		20	-0.48145	-1.66739	0.0090703	0.0755629	1	1401	tags=80%, list=45%, signal=144%
FC-GAMMA RECEPTOR SIGNALING PATHWAY INVOLVED IN PHAGOCYTOSIS%GOBP%GO:0038096	FC-GAMMA RECEPTOR SIGNALING PATHWAY INVOLVED IN PHAGOCYTOSIS%GOBP%GO:0038096		21	-0.475589	-1.66534	0.0110132	0.0765644	1	955	tags=57%, list=31%, signal=82%
REGULATION OF T CELL ACTIVATION%GOBP%GO:0050863	REGULATION OF T CELL ACTIVATION%GOBP%GO:0050863		59	-0.39873	-1.66277	0.00205973	0.0779785	1	998	tags=54%, list=32%, signal=78%
FC RECEPTOR SIGNALING PATHWAY%GOBP%GO:0038093	FC RECEPTOR SIGNALING PATHWAY%GOBP%GO:0038093		35	-0.438463	-1.66233	0.00635593	0.0777783	1	1472	tags=77%, list=47%, signal=145%
SYNAPTIC SIGNALING%GOBP%GO:0099536	SYNAPTIC SIGNALING%GOBP%GO:0099536		68	-0.388827	-1.66217	0.00100604	0.0774265	1	1174	tags=59%, list=38%, signal=92%
REGULATION OF MEMBRANE POTENTIAL%GOBP%GO:0042391	REGULATION OF MEMBRANE POTENTIAL%GOBP%GO:0042391		85	-0.375791	-1.66184	0.0020141	0.0772688	1	1182	tags=55%, list=38%, signal=87%
HALLMARK_ALLOGRAFT_REJECTION%MSIGDB_C2%HALLMARK_ALLOGRAFT_REJECTION	HALLMARK_ALLOGRAFT_REJECTION%MSIGDB_C2%HALLMARK_ALLOGRAFT_REJECTION		62	-0.390934	-1.66084	0.00306435	0.0774796	1	991	tags=55%, list=32%, signal=79%
CYTOSOLIC CALCIUM ION TRANSPORT%GOBP%GO:0060401	CYTOSOLIC CALCIUM ION TRANSPORT%GOBP%GO:0060401		28	-0.449907	-1.65945	0.012973	0.0780214	1	588	tags=43%, list=19%, signal=52%
CARDIAC PROGENITOR DIFFERENTIATION%WIKIPATHWAYS_20200510%WP2406%HOMO SAPIENS	CARDIAC PROGENITOR DIFFERENTIATION%WIKIPATHWAYS_20200510%WP2406%HOMO SAPIENS		21	-0.485986	-1.65539	0.0134983	0.080625	1	746	tags=52%, list=24%, signal=68%
G PROTEIN-COUPLED RECEPTOR SIGNALING PATHWAY%GOBP%GO:0007186	G PROTEIN-COUPLED RECEPTOR SIGNALING PATHWAY%GOBP%GO:0007186		179	-0.347159	-1.65183	0	0.0827401	1	1004	tags=50%, list=32%, signal=69%
POSITIVE REGULATION OF LYMPHOCYTE PROLIFERATION%GOBP%GO:0050671	POSITIVE REGULATION OF LYMPHOCYTE PROLIFERATION%GOBP%GO:0050671		31	-0.432932	-1.65041	0.0096463	0.0833601	1	792	tags=48%, list=25%, signal=64%
ACTIVATION OF IMMUNE RESPONSE%GOBP%GO:0002253	ACTIVATION OF IMMUNE RESPONSE%GOBP%GO:0002253		111	-0.362922	-1.64797	0	0.0846206	1	1061	tags=53%, list=34%, signal=78%
IMMUNE RESPONSE-REGULATING CELL SURFACE RECEPTOR SIGNALING PATHWAY INVOLVED IN PHAGOCYTOSIS%GOBP%GO:0002433	IMMUNE RESPONSE-REGULATING CELL SURFACE RECEPTOR SIGNALING PATHWAY INVOLVED IN PHAGOCYTOSIS%GOBP%GO:0002433		21	-0.475589	-1.64673	0.0155039	0.0850754	1	955	tags=57%, list=31%, signal=82%
CELLULAR RESPONSE TO INTERFERON-GAMMA%GOBP%GO:0071346	CELLULAR RESPONSE TO INTERFERON-GAMMA%GOBP%GO:0071346		29	-0.448546	-1.64598	0.00954401	0.0851987	1	1061	tags=59%, list=34%, signal=88%
REGULATION OF B CELL PROLIFERATION%GOBP%GO:0030888	REGULATION OF B CELL PROLIFERATION%GOBP%GO:0030888		20	-0.483631	-1.64547	0.0143965	0.08506	1	1201	tags=75%, list=39%, signal=121%
POTASSIUM ION TRANSMEMBRANE TRANSPORT%GOBP%GO:0071805	POTASSIUM ION TRANSMEMBRANE TRANSPORT%GOBP%GO:0071805		22	-0.467752	-1.64341	0.00783875	0.0862668	1	1457	tags=82%, list=47%, signal=153%
REGULATION OF MUSCLE CELL DIFFERENTIATION%GOBP%GO:0051147	REGULATION OF MUSCLE CELL DIFFERENTIATION%GOBP%GO:0051147		27	-0.44479	-1.64244	0.0119826	0.0865695	1	569	tags=41%, list=18%, signal=49%
LOCALIZATION WITHIN MEMBRANE%GOBP%GO:0051668	LOCALIZATION WITHIN MEMBRANE%GOBP%GO:0051668		19	-0.487481	-1.6386	0.0135287	0.0893528	1	1446	tags=84%, list=46%, signal=156%
POSITIVE REGULATION OF LEUKOCYTE PROLIFERATION%GOBP%GO:0070665	POSITIVE REGULATION OF LEUKOCYTE PROLIFERATION%GOBP%GO:0070665		33	-0.429387	-1.63769	0.012945	0.0895563	1	792	tags=48%, list=25%, signal=64%
T CELL RECEPTOR SIGNALING PATHWAY%GOBP%GO:0050852	T CELL RECEPTOR SIGNALING PATHWAY%GOBP%GO:0050852		29	-0.437655	-1.6368	0.0163577	0.0897331	1	1061	tags=62%, list=34%, signal=93%
LEISHMANIA INFECTION%REACTOME%R-HSA-9658195.1	LEISHMANIA INFECTION%REACTOME%R-HSA-9658195.1		66	-0.386883	-1.63515	0.00607903	0.0907305	1	1286	tags=64%, list=41%, signal=106%
CELLULAR HOMEOSTASIS%GOBP%GO:0019725	CELLULAR HOMEOSTASIS%GOBP%GO:0019725		146	-0.347442	-1.63408	0	0.0911064	1	1053	tags=48%, list=34%, signal=69%
TRANSMISSION ACROSS CHEMICAL SYNAPSES%REACTOME DATABASE ID RELEASE 72%112315	TRANSMISSION ACROSS CHEMICAL SYNAPSES%REACTOME DATABASE ID RELEASE 72%112315		51	-0.393953	-1.63129	0.00411523	0.0930389	1	1236	tags=63%, list=40%, signal=102%
REGULATION OF BLOOD CIRCULATION%GOBP%GO:1903522	REGULATION OF BLOOD CIRCULATION%GOBP%GO:1903522		79	-0.376648	-1.63103	0.00302725	0.0926741	1	415	tags=28%, list=13%, signal=31%
CATION TRANSPORT%GOBP%GO:0006812	CATION TRANSPORT%GOBP%GO:0006812		104	-0.357947	-1.63028	0	0.0928056	1	1141	tags=53%, list=37%, signal=81%
CELLULAR CHEMICAL HOMEOSTASIS%GOBP%GO:0055082	CELLULAR CHEMICAL HOMEOSTASIS%GOBP%GO:0055082		132	-0.353862	-1.6302	0	0.0923565	1	1053	tags=49%, list=34%, signal=71%
CATION HOMEOSTASIS%GOBP%GO:0055080	CATION HOMEOSTASIS%GOBP%GO:0055080		126	-0.354758	-1.63017	0	0.0918653	1	1053	tags=50%, list=34%, signal=72%
REGULATION OF STRIATED MUSCLE CONTRACTION%GOBP%GO:0006942	REGULATION OF STRIATED MUSCLE CONTRACTION%GOBP%GO:0006942		33	-0.425442	-1.62955	0.0106496	0.0918727	1	405	tags=30%, list=13%, signal=34%
INORGANIC ION HOMEOSTASIS%GOBP%GO:0098771	INORGANIC ION HOMEOSTASIS%GOBP%GO:0098771		128	-0.356419	-1.62729	0	0.0931641	1	1053	tags=50%, list=34%, signal=72%
POSITIVE REGULATION OF MONONUCLEAR CELL PROLIFERATION%GOBP%GO:0032946	POSITIVE REGULATION OF MONONUCLEAR CELL PROLIFERATION%GOBP%GO:0032946		31	-0.432932	-1.62445	0.0119435	0.0951164	1	792	tags=48%, list=25%, signal=64%
CXCR4-MEDIATED SIGNALING EVENTS%PATHWAY INTERACTION DATABASE NCI-NATURE CURATED DATA%CXCR4-MEDIATED SIGNALING EVENTS	CXCR4-MEDIATED SIGNALING EVENTS%PATHWAY INTERACTION DATABASE NCI-NATURE CURATED DATA%CXCR4-MEDIATED SIGNALING EVENTS		23	-0.460036	-1.62408	0.0132304	0.0949605	1	1044	tags=61%, list=33%, signal=91%
POSITIVE REGULATION OF CHEMOTAXIS%GOBP%GO:0050921	POSITIVE REGULATION OF CHEMOTAXIS%GOBP%GO:0050921		33	-0.427217	-1.62263	0.0126449	0.0957282	1	390	tags=36%, list=13%, signal=41%
CELL RECOGNITION%GOBP%GO:0008037	CELL RECOGNITION%GOBP%GO:0008037		21	-0.466796	-1.62192	0.0214689	0.0958207	1	778	tags=52%, list=25%, signal=69%
ORGANELLE ASSEMBLY%GOBP%GO:0070925	ORGANELLE ASSEMBLY%GOBP%GO:0070925		71	-0.37228	-1.62046	0.00607287	0.0966446	1	274	tags=21%, list=9%, signal=23%
ANTIGEN RECEPTOR-MEDIATED SIGNALING PATHWAY%GOBP%GO:0050851	ANTIGEN RECEPTOR-MEDIATED SIGNALING PATHWAY%GOBP%GO:0050851		45	-0.404557	-1.61876	0.00520291	0.0974602	1	991	tags=56%, list=32%, signal=80%
NEUTROPHIL MIGRATION%GOBP%GO:1990266	NEUTROPHIL MIGRATION%GOBP%GO:1990266		19	-0.485647	-1.61388	0.0237557	0.101424	1	965	tags=68%, list=31%, signal=98%
REGULATION OF NEUROTRANSMITTER TRANSPORT%GOBP%GO:0051588	REGULATION OF NEUROTRANSMITTER TRANSPORT%GOBP%GO:0051588		17	-0.496147	-1.60986	0.0173611	0.104556	1	936	tags=59%, list=30%, signal=84%
REGULATION OF TRANSMEMBRANE TRANSPORT%GOBP%GO:0034762	REGULATION OF TRANSMEMBRANE TRANSPORT%GOBP%GO:0034762		81	-0.359459	-1.60979	0.00405269	0.10411	1	1265	tags=58%, list=41%, signal=95%
POSITIVE REGULATION OF OSSIFICATION%GOBP%GO:0045778	POSITIVE REGULATION OF OSSIFICATION%GOBP%GO:0045778		26	-0.438079	-1.60467	0.0165198	0.108193	1	559	tags=38%, list=18%, signal=46%
ADORA2B MEDIATED ANTI-INFLAMMATORY CYTOKINES PRODUCTION%REACTOME DATABASE ID RELEASE 72%9660821	ADORA2B MEDIATED ANTI-INFLAMMATORY CYTOKINES PRODUCTION%REACTOME DATABASE ID RELEASE 72%9660821		35	-0.41809	-1.59812	0.0126984	0.11398	1	1286	tags=71%, list=41%, signal=120%
CARDIAC MUSCLE CELL ACTION POTENTIAL%GOBP%GO:0086001	CARDIAC MUSCLE CELL ACTION POTENTIAL%GOBP%GO:0086001		16	-0.492398	-1.59753	0.0173611	0.114013	1	1523	tags=94%, list=49%, signal=182%
POSITIVE REGULATION OF PHAGOCYTOSIS%GOBP%GO:0050766	POSITIVE REGULATION OF PHAGOCYTOSIS%GOBP%GO:0050766		17	-0.489475	-1.59705	0.0280702	0.114033	1	1123	tags=71%, list=36%, signal=110%
RESPONSE TO TUMOR NECROSIS FACTOR%GOBP%GO:0034612	RESPONSE TO TUMOR NECROSIS FACTOR%GOBP%GO:0034612		24	-0.449128	-1.59692	0.0223714	0.113561	1	965	tags=54%, list=31%, signal=78%
INFLAMMATION MEDIATED BY CHEMOKINE AND CYTOKINE SIGNALING PATHWAY%PANTHER PATHWAY%P00031	INFLAMMATION MEDIATED BY CHEMOKINE AND CYTOKINE SIGNALING PATHWAY%PANTHER PATHWAY%P00031		55	-0.384669	-1.59446	0.00307692	0.115486	1	1540	tags=75%, list=49%, signal=145%
SYNAPSE ORGANIZATION%GOBP%GO:0050808	SYNAPSE ORGANIZATION%GOBP%GO:0050808		45	-0.387912	-1.58466	0.0105374	0.124613	1	1142	tags=56%, list=37%, signal=86%
PID_CXCR4_PATHWAY%MSIGDB_C2%PID_CXCR4_PATHWAY	PID_CXCR4_PATHWAY%MSIGDB_C2%PID_CXCR4_PATHWAY		33	-0.415351	-1.58201	0.0214592	0.126973	1	1044	tags=58%, list=33%, signal=86%
RELEASE OF SEQUESTERED CALCIUM ION INTO CYTOSOL%GOBP%GO:0051209	RELEASE OF SEQUESTERED CALCIUM ION INTO CYTOSOL%GOBP%GO:0051209		17	-0.48219	-1.57983	0.0248027	0.128884	1	588	tags=41%, list=19%, signal=50%
PROTEIN ACTIVATION CASCADE%GOBP%GO:0072376	PROTEIN ACTIVATION CASCADE%GOBP%GO:0072376		28	-0.41983	-1.57761	0.0260022	0.130767	1	1037	tags=64%, list=33%, signal=95%
DIVALENT INORGANIC CATION TRANSPORT%GOBP%GO:0072511	DIVALENT INORGANIC CATION TRANSPORT%GOBP%GO:0072511		58	-0.373901	-1.57625	0.0132653	0.131482	1	1053	tags=52%, list=34%, signal=77%
POSITIVE REGULATION OF CATION CHANNEL ACTIVITY%GOBP%GO:2001259	POSITIVE REGULATION OF CATION CHANNEL ACTIVITY%GOBP%GO:2001259		18	-0.468121	-1.57118	0.0340136	0.136675	1	1182	tags=67%, list=38%, signal=107%
INTERFERON-GAMMA-MEDIATED SIGNALING PATHWAY%GOBP%GO:0060333	INTERFERON-GAMMA-MEDIATED SIGNALING PATHWAY%GOBP%GO:0060333		21	-0.448732	-1.57064	0.0280584	0.136641	1	657	tags=43%, list=21%, signal=54%
CARDIAC CONDUCTION%REACTOME DATABASE ID RELEASE 72%5576891	CARDIAC CONDUCTION%REACTOME DATABASE ID RELEASE 72%5576891		37	-0.405255	-1.57059	0.0181624	0.136115	1	1132	tags=57%, list=36%, signal=88%
NEUTROPHIL CHEMOTAXIS%GOBP%GO:0030593	NEUTROPHIL CHEMOTAXIS%GOBP%GO:0030593		18	-0.470622	-1.56569	0.0385051	0.141115	1	965	tags=67%, list=31%, signal=96%
ION HOMEOSTASIS%GOBP%GO:0050801	ION HOMEOSTASIS%GOBP%GO:0050801		147	-0.334434	-1.56287	0	0.143744	1	1053	tags=48%, list=34%, signal=69%
PROTEIN-PROTEIN INTERACTIONS AT SYNAPSES%REACTOME DATABASE ID RELEASE 72%6794362	PROTEIN-PROTEIN INTERACTIONS AT SYNAPSES%REACTOME DATABASE ID RELEASE 72%6794362		21	-0.454654	-1.56239	0.0145089	0.143642	1	1089	tags=62%, list=35%, signal=95%
POSITIVE REGULATION OF FAT CELL DIFFERENTIATION%GOBP%GO:0045600	POSITIVE REGULATION OF FAT CELL DIFFERENTIATION%GOBP%GO:0045600		16	-0.476345	-1.56089	0.0455076	0.144877	1	377	tags=38%, list=12%, signal=42%
NEUROTRANSMITTER RECEPTORS AND POSTSYNAPTIC SIGNAL TRANSMISSION%REACTOME%R-HSA-112314.7	NEUROTRANSMITTER RECEPTORS AND POSTSYNAPTIC SIGNAL TRANSMISSION%REACTOME%R-HSA-112314.7		38	-0.404396	-1.56023	0.0127119	0.144985	1	1236	tags=63%, list=40%, signal=103%
DIVALENT METAL ION TRANSPORT%GOBP%GO:0070838	DIVALENT METAL ION TRANSPORT%GOBP%GO:0070838		58	-0.373901	-1.55372	0.01222	0.152289	1	1053	tags=52%, list=34%, signal=77%
REGULATION OF BLOOD PRESSURE%GOBP%GO:0008217	REGULATION OF BLOOD PRESSURE%GOBP%GO:0008217		37	-0.398096	-1.55134	0.0222222	0.154488	1	1493	tags=73%, list=48%, signal=138%
REGULATION OF CATION CHANNEL ACTIVITY%GOBP%GO:2001257	REGULATION OF CATION CHANNEL ACTIVITY%GOBP%GO:2001257		35	-0.395943	-1.54921	0.0277481	0.156221	1	1523	tags=74%, list=49%, signal=144%
CARDIOCYTE DIFFERENTIATION%GOBP%GO:0035051	CARDIOCYTE DIFFERENTIATION%GOBP%GO:0035051		23	-0.436457	-1.54791	0.026936	0.15718	1	876	tags=48%, list=28%, signal=66%
POSITIVE REGULATION OF CATION TRANSMEMBRANE TRANSPORT%GOBP%GO:1904064	POSITIVE REGULATION OF CATION TRANSMEMBRANE TRANSPORT%GOBP%GO:1904064		31	-0.40833	-1.54742	0.0245989	0.157068	1	1182	tags=58%, list=38%, signal=93%
POSITIVE REGULATION OF T CELL PROLIFERATION%GOBP%GO:0042102	POSITIVE REGULATION OF T CELL PROLIFERATION%GOBP%GO:0042102		21	-0.44833	-1.54703	0.03125	0.156859	1	778	tags=48%, list=25%, signal=63%
HALLMARK_INFLAMMATORY_RESPONSE%MSIGDB_C2%HALLMARK_INFLAMMATORY_RESPONSE	HALLMARK_INFLAMMATORY_RESPONSE%MSIGDB_C2%HALLMARK_INFLAMMATORY_RESPONSE		72	-0.352547	-1.54653	0.00709939	0.156761	1	958	tags=46%, list=31%, signal=65%
HALLMARK_IL6_JAK_STAT3_SIGNALING%MSIGDB_C2%HALLMARK_IL6_JAK_STAT3_SIGNALING	HALLMARK_IL6_JAK_STAT3_SIGNALING%MSIGDB_C2%HALLMARK_IL6_JAK_STAT3_SIGNALING		27	-0.417072	-1.54524	0.0240437	0.157716	1	1283	tags=67%, list=41%, signal=112%
ACTIN CYTOSKELETON ORGANIZATION%GOBP%GO:0030036	ACTIN CYTOSKELETON ORGANIZATION%GOBP%GO:0030036		117	-0.341327	-1.54081	0.00401204	0.162547	1	587	tags=30%, list=19%, signal=35%
RESPONSE TO INTERFERON-GAMMA%GOBP%GO:0034341	RESPONSE TO INTERFERON-GAMMA%GOBP%GO:0034341		34	-0.399186	-1.53857	0.0300107	0.16484	1	1061	tags=53%, list=34%, signal=79%
IMMUNE RESPONSE-REGULATING SIGNALING PATHWAY%GOBP%GO:0002764	IMMUNE RESPONSE-REGULATING SIGNALING PATHWAY%GOBP%GO:0002764		104	-0.337381	-1.53798	0.00301205	0.164828	1	1472	tags=67%, list=47%, signal=123%
REGULATION OF IMMUNE SYSTEM PROCESS%GOBP%GO:0002682	REGULATION OF IMMUNE SYSTEM PROCESS%GOBP%GO:0002682		296	-0.316625	-1.53754	0	0.164648	1	1009	tags=45%, list=32%, signal=60%
CELLULAR RESPONSE TO CALCIUM ION%GOBP%GO:0071277	CELLULAR RESPONSE TO CALCIUM ION%GOBP%GO:0071277		16	-0.472377	-1.53678	0.0424028	0.164983	1	1238	tags=75%, list=40%, signal=124%
CELLULAR DEFENSE RESPONSE%GOBP%GO:0006968	CELLULAR DEFENSE RESPONSE%GOBP%GO:0006968		15	-0.489968	-1.5364	0.0291036	0.164846	1	849	tags=60%, list=27%, signal=82%
POSITIVE REGULATION OF IMMUNE RESPONSE%GOBP%GO:0050778	POSITIVE REGULATION OF IMMUNE RESPONSE%GOBP%GO:0050778		148	-0.332223	-1.53526	0.001001	0.16559	1	1009	tags=48%, list=32%, signal=68%
CARDIAC MUSCLE TISSUE DEVELOPMENT%GOBP%GO:0048738	CARDIAC MUSCLE TISSUE DEVELOPMENT%GOBP%GO:0048738		36	-0.391124	-1.53444	0.037234	0.166041	1	1481	tags=72%, list=48%, signal=136%
ION TRANSPORT%GOBP%GO:0006811	ION TRANSPORT%GOBP%GO:0006811		178	-0.32462	-1.53374	0	0.166314	1	1141	tags=49%, list=37%, signal=73%
REGULATION OF LEUKOCYTE CHEMOTAXIS%GOBP%GO:0002688	REGULATION OF LEUKOCYTE CHEMOTAXIS%GOBP%GO:0002688		27	-0.422743	-1.53364	0.0308183	0.165713	1	390	tags=37%, list=13%, signal=42%
REGULATION OF SYSTEMIC ARTERIAL BLOOD PRESSURE MEDIATED BY A CHEMICAL SIGNAL%GOBP%GO:0003044	REGULATION OF SYSTEMIC ARTERIAL BLOOD PRESSURE MEDIATED BY A CHEMICAL SIGNAL%GOBP%GO:0003044		21	-0.443803	-1.53268	0.0398633	0.166367	1	614	tags=48%, list=20%, signal=59%
AXON GUIDANCE%REACTOME%R-HSA-422475.6	AXON GUIDANCE%REACTOME%R-HSA-422475.6		90	-0.340369	-1.53199	0.00402414	0.166608	1	1252	tags=53%, list=40%, signal=87%
PEPTIDE METABOLIC PROCESS%GOBP%GO:0006518	PEPTIDE METABOLIC PROCESS%GOBP%GO:0006518		39	-0.385455	-1.52966	0.0252632	0.168979	1	734	tags=33%, list=24%, signal=43%
POSITIVE REGULATION OF TRANSMEMBRANE TRANSPORT%GOBP%GO:0034764	POSITIVE REGULATION OF TRANSMEMBRANE TRANSPORT%GOBP%GO:0034764		39	-0.388712	-1.5282	0.0252366	0.170356	1	1308	tags=62%, list=42%, signal=105%
ION TRANSMEMBRANE TRANSPORT%GOBP%GO:0034220	ION TRANSMEMBRANE TRANSPORT%GOBP%GO:0034220		100	-0.336111	-1.52592	0.0100402	0.172694	1	1141	tags=50%, list=37%, signal=76%
CELL COMMUNICATION INVOLVED IN CARDIAC CONDUCTION%GOBP%GO:0086065	CELL COMMUNICATION INVOLVED IN CARDIAC CONDUCTION%GOBP%GO:0086065		17	-0.463546	-1.52542	0.045977	0.172708	1	1155	tags=71%, list=37%, signal=112%
DEFENSE RESPONSE%GOBP%GO:0006952	DEFENSE RESPONSE%GOBP%GO:0006952		205	-0.316673	-1.52064	0	0.178746	1	1042	tags=47%, list=33%, signal=66%
IMMUNE RESPONSE-ACTIVATING SIGNAL TRANSDUCTION%GOBP%GO:0002757	IMMUNE RESPONSE-ACTIVATING SIGNAL TRANSDUCTION%GOBP%GO:0002757		97	-0.339073	-1.519	0.00808081	0.180347	1	1061	tags=52%, list=34%, signal=76%
REGULATION OF SECRETION BY CELL%GOBP%GO:1903530	REGULATION OF SECRETION BY CELL%GOBP%GO:1903530		116	-0.331033	-1.51892	0.00503018	0.179711	1	1042	tags=50%, list=33%, signal=72%
PEPTIDE GPCRS%WIKIPATHWAYS_20200510%WP24%HOMO SAPIENS	PEPTIDE GPCRS%WIKIPATHWAYS_20200510%WP24%HOMO SAPIENS		25	-0.421646	-1.51784	0.0430464	0.180549	1	951	tags=60%, list=31%, signal=86%
CHEMOKINE SIGNALING PATHWAY%WIKIPATHWAYS_20200510%WP3929%HOMO SAPIENS	CHEMOKINE SIGNALING PATHWAY%WIKIPATHWAYS_20200510%WP3929%HOMO SAPIENS		44	-0.372417	-1.51725	0.0216495	0.180528	1	1265	tags=61%, list=41%, signal=102%
SIGNALING BY GPCR%REACTOME%R-HSA-372790.4	SIGNALING BY GPCR%REACTOME%R-HSA-372790.4		190	-0.319998	-1.51337	0.001	0.185378	1	1093	tags=49%, list=35%, signal=72%
GRANULOCYTE MIGRATION%GOBP%GO:0097530	GRANULOCYTE MIGRATION%GOBP%GO:0097530		21	-0.444464	-1.51236	0.0371622	0.185982	1	965	tags=62%, list=31%, signal=89%
POSITIVE REGULATION OF TRANSPORT%GOBP%GO:0051050	POSITIVE REGULATION OF TRANSPORT%GOBP%GO:0051050		169	-0.32204	-1.511	0.001002	0.187307	1	1328	tags=57%, list=43%, signal=94%
CARDIAC VENTRICLE DEVELOPMENT%GOBP%GO:0003231	CARDIAC VENTRICLE DEVELOPMENT%GOBP%GO:0003231		25	-0.417393	-1.5107	0.0382932	0.186968	1	1229	tags=64%, list=39%, signal=105%
REGULATION OF REGULATED SECRETORY PATHWAY%GOBP%GO:1903305	REGULATION OF REGULATED SECRETORY PATHWAY%GOBP%GO:1903305		24	-0.419828	-1.51029	0.0422993	0.186817	1	1035	tags=58%, list=33%, signal=87%
REGULATION OF SECRETION%GOBP%GO:0051046	REGULATION OF SECRETION%GOBP%GO:0051046		125	-0.329084	-1.50973	0.00400802	0.186828	1	1042	tags=50%, list=33%, signal=72%
CALCIUM ION TRANSMEMBRANE IMPORT INTO CYTOSOL%GOBP%GO:0097553	CALCIUM ION TRANSMEMBRANE IMPORT INTO CYTOSOL%GOBP%GO:0097553		21	-0.432429	-1.50847	0.0444191	0.187938	1	588	tags=38%, list=19%, signal=47%
GPCR DOWNSTREAM SIGNALLING%REACTOME DATABASE ID RELEASE 72%388396	GPCR DOWNSTREAM SIGNALLING%REACTOME DATABASE ID RELEASE 72%388396		176	-0.318181	-1.50659	0.001	0.189875	1	1265	tags=56%, list=41%, signal=88%
RESPONSE TO MECHANICAL STIMULUS%GOBP%GO:0009612	RESPONSE TO MECHANICAL STIMULUS%GOBP%GO:0009612		23	-0.429425	-1.50645	0.0312849	0.189353	1	1050	tags=57%, list=34%, signal=85%
LYMPHOCYTE MEDIATED IMMUNITY%GOBP%GO:0002449	LYMPHOCYTE MEDIATED IMMUNITY%GOBP%GO:0002449		30	-0.400403	-1.50632	0.0408163	0.188771	1	955	tags=53%, list=31%, signal=76%
CELL-CELL SIGNALING%GOBP%GO:0007267	CELL-CELL SIGNALING%GOBP%GO:0007267		188	-0.319127	-1.50435	0.001	0.191015	1	1319	tags=57%, list=42%, signal=94%
REGULATION OF ION TRANSMEMBRANE TRANSPORTER ACTIVITY%GOBP%GO:0032412	REGULATION OF ION TRANSMEMBRANE TRANSPORTER ACTIVITY%GOBP%GO:0032412		52	-0.362548	-1.50359	0.0196281	0.191369	1	1475	tags=67%, list=47%, signal=126%
REGULATION OF BONE MINERALIZATION%GOBP%GO:0030500	REGULATION OF BONE MINERALIZATION%GOBP%GO:0030500		21	-0.429956	-1.50336	0.0538117	0.190942	1	1086	tags=57%, list=35%, signal=87%
GRANULOCYTE CHEMOTAXIS%GOBP%GO:0071621	GRANULOCYTE CHEMOTAXIS%GOBP%GO:0071621		19	-0.454561	-1.50296	0.0533485	0.19076	1	965	tags=63%, list=31%, signal=91%
REGULATION OF ACTIN POLYMERIZATION OR DEPOLYMERIZATION%GOBP%GO:0008064	REGULATION OF ACTIN POLYMERIZATION OR DEPOLYMERIZATION%GOBP%GO:0008064		33	-0.395954	-1.50198	0.0409924	0.191522	1	886	tags=45%, list=28%, signal=63%
AMINOGLYCAN METABOLIC PROCESS%GOBP%GO:0006022	AMINOGLYCAN METABOLIC PROCESS%GOBP%GO:0006022		35	-0.383759	-1.50196	0.032735	0.190824	1	427	tags=29%, list=14%, signal=33%
HUMAN COMPLEMENT SYSTEM%WIKIPATHWAYS_20200510%WP2806%HOMO SAPIENS	HUMAN COMPLEMENT SYSTEM%WIKIPATHWAYS_20200510%WP2806%HOMO SAPIENS		36	-0.387752	-1.49628	0.0404686	0.198637	1	835	tags=50%, list=27%, signal=68%
CADHERIN SIGNALING PATHWAY%PANTHER PATHWAY%P00012	CADHERIN SIGNALING PATHWAY%PANTHER PATHWAY%P00012		39	-0.374778	-1.4958	0.0366876	0.198592	1	617	tags=36%, list=20%, signal=44%
DEVELOPMENTAL MATURATION%GOBP%GO:0021700	DEVELOPMENTAL MATURATION%GOBP%GO:0021700		26	-0.405664	-1.49259	0.0498915	0.202436	1	579	tags=38%, list=19%, signal=47%
HEART MORPHOGENESIS%GOBP%GO:0003007	HEART MORPHOGENESIS%GOBP%GO:0003007		47	-0.367283	-1.49237	0.0270833	0.201965	1	1501	tags=70%, list=48%, signal=133%
SARCOMERE ORGANIZATION%GOBP%GO:0045214	SARCOMERE ORGANIZATION%GOBP%GO:0045214		15	-0.471585	-1.49148	0.0643985	0.202639	1	666	tags=47%, list=21%, signal=59%
COSTIMULATION BY THE CD28 FAMILY%REACTOME%R-HSA-388841.2	COSTIMULATION BY THE CD28 FAMILY%REACTOME%R-HSA-388841.2		17	-0.459421	-1.49032	0.0613426	0.203799	1	1061	tags=71%, list=34%, signal=106%
IMMUNOREGULATORY INTERACTIONS BETWEEN A LYMPHOID AND A NON-LYMPHOID CELL%REACTOME DATABASE ID RELEASE 72%198933	IMMUNOREGULATORY INTERACTIONS BETWEEN A LYMPHOID AND A NON-LYMPHOID CELL%REACTOME DATABASE ID RELEASE 72%198933		44	-0.373923	-1.48932	0.0322917	0.204581	1	955	tags=52%, list=31%, signal=74%
MODULATION OF CHEMICAL SYNAPTIC TRANSMISSION%GOBP%GO:0050804	MODULATION OF CHEMICAL SYNAPTIC TRANSMISSION%GOBP%GO:0050804		59	-0.351056	-1.48772	0.0295918	0.206339	1	1331	tags=61%, list=43%, signal=104%
REGULATION OF CELLULAR LOCALIZATION%GOBP%GO:0060341	REGULATION OF CELLULAR LOCALIZATION%GOBP%GO:0060341		119	-0.322335	-1.48553	0.0110553	0.20892	1	1001	tags=41%, list=32%, signal=58%
INFECTIOUS DISEASE%REACTOME%R-HSA-5663205.10	INFECTIOUS DISEASE%REACTOME%R-HSA-5663205.10		89	-0.334857	-1.48537	0.0171891	0.208403	1	1383	tags=60%, list=44%, signal=104%
CATION TRANSMEMBRANE TRANSPORT%GOBP%GO:0098655	CATION TRANSMEMBRANE TRANSPORT%GOBP%GO:0098655		71	-0.341447	-1.48531	0.0263425	0.207733	1	1542	tags=68%, list=49%, signal=131%
REGULATION OF BIOMINERAL TISSUE DEVELOPMENT%GOBP%GO:0070167	REGULATION OF BIOMINERAL TISSUE DEVELOPMENT%GOBP%GO:0070167		23	-0.423493	-1.48387	0.0473047	0.209313	1	649	tags=43%, list=21%, signal=55%
ENDOCRINE PROCESS%GOBP%GO:0050886	ENDOCRINE PROCESS%GOBP%GO:0050886		15	-0.461947	-1.48368	0.0628638	0.208887	1	923	tags=60%, list=30%, signal=85%
GLYCOSAMINOGLYCAN METABOLIC PROCESS%GOBP%GO:0030203	GLYCOSAMINOGLYCAN METABOLIC PROCESS%GOBP%GO:0030203		34	-0.390114	-1.48255	0.037234	0.209987	1	427	tags=29%, list=14%, signal=34%
G ALPHA (I) SIGNALLING EVENTS%REACTOME DATABASE ID RELEASE 72%418594	G ALPHA (I) SIGNALLING EVENTS%REACTOME DATABASE ID RELEASE 72%418594		94	-0.331671	-1.48213	0.0120482	0.209871	1	1409	tags=65%, list=45%, signal=115%
LEUKOCYTE CHEMOTAXIS%GOBP%GO:0030595	LEUKOCYTE CHEMOTAXIS%GOBP%GO:0030595		35	-0.384057	-1.48205	0.0338983	0.209236	1	1454	tags=77%, list=47%, signal=143%
REGULATION OF HEMOPOIESIS%GOBP%GO:1903706	REGULATION OF HEMOPOIESIS%GOBP%GO:1903706		63	-0.342776	-1.48101	0.0294715	0.210125	1	1026	tags=48%, list=33%, signal=70%
NEGATIVE REGULATION OF SEQUESTERING OF CALCIUM ION%GOBP%GO:0051283	NEGATIVE REGULATION OF SEQUESTERING OF CALCIUM ION%GOBP%GO:0051283		18	-0.448449	-1.4797	0.0677382	0.211494	1	588	tags=39%, list=19%, signal=48%
PLATELET HOMEOSTASIS%REACTOME%R-HSA-418346.2	PLATELET HOMEOSTASIS%REACTOME%R-HSA-418346.2		27	-0.399078	-1.47821	0.045204	0.213312	1	1715	tags=89%, list=55%, signal=196%
REGULATION OF IMMUNE RESPONSE%GOBP%GO:0050776	REGULATION OF IMMUNE RESPONSE%GOBP%GO:0050776		210	-0.308456	-1.47565	0.001	0.216638	1	1009	tags=45%, list=32%, signal=62%
MYELOID LEUKOCYTE MIGRATION%GOBP%GO:0097529	MYELOID LEUKOCYTE MIGRATION%GOBP%GO:0097529		27	-0.401203	-1.47419	0.0529217	0.218299	1	965	tags=56%, list=31%, signal=80%
HALLMARK_HEME_METABOLISM%MSIGDB_C2%HALLMARK_HEME_METABOLISM	HALLMARK_HEME_METABOLISM%MSIGDB_C2%HALLMARK_HEME_METABOLISM		25	-0.411444	-1.47379	0.0595369	0.218191	1	323	tags=20%, list=10%, signal=22%
REGULATION OF IMMUNE EFFECTOR PROCESS%GOBP%GO:0002697	REGULATION OF IMMUNE EFFECTOR PROCESS%GOBP%GO:0002697		79	-0.335785	-1.47252	0.0151515	0.219535	1	1360	tags=62%, list=44%, signal=107%
REGULATION OF TRANSMEMBRANE TRANSPORTER ACTIVITY%GOBP%GO:0022898	REGULATION OF TRANSMEMBRANE TRANSPORTER ACTIVITY%GOBP%GO:0022898		53	-0.352506	-1.47223	0.0393782	0.219209	1	1475	tags=66%, list=47%, signal=123%
NABA_CORE_MATRISOME%MSIGDB_C2%NABA_CORE_MATRISOME	NABA_CORE_MATRISOME%MSIGDB_C2%NABA_CORE_MATRISOME		118	-0.320579	-1.47203	0.00800801	0.218821	1	1822	tags=82%, list=58%, signal=190%
REGULATION OF ADAPTIVE IMMUNE RESPONSE%GOBP%GO:0002819	REGULATION OF ADAPTIVE IMMUNE RESPONSE%GOBP%GO:0002819		26	-0.403483	-1.47203	0.0527473	0.21807	1	957	tags=54%, list=31%, signal=77%
POSITIVE REGULATION OF SECRETION BY CELL%GOBP%GO:1903532	POSITIVE REGULATION OF SECRETION BY CELL%GOBP%GO:1903532		65	-0.339716	-1.47155	0.0326531	0.218065	1	1319	tags=63%, list=42%, signal=107%
CELL-CELL ADHESION VIA PLASMA-MEMBRANE ADHESION MOLECULES%GOBP%GO:0098742	CELL-CELL ADHESION VIA PLASMA-MEMBRANE ADHESION MOLECULES%GOBP%GO:0098742		55	-0.352519	-1.47044	0.031665	0.21912	1	1331	tags=62%, list=43%, signal=106%
POSITIVE REGULATION OF ION TRANSMEMBRANE TRANSPORT%GOBP%GO:0034767	POSITIVE REGULATION OF ION TRANSMEMBRANE TRANSPORT%GOBP%GO:0034767		35	-0.378046	-1.47039	0.0473684	0.218448	1	1308	tags=60%, list=42%, signal=102%
SMOOTH MUSCLE CONTRACTION%REACTOME%R-HSA-445355.3	SMOOTH MUSCLE CONTRACTION%REACTOME%R-HSA-445355.3		19	-0.441314	-1.46956	0.0604027	0.218968	1	400	tags=37%, list=13%, signal=42%
REGULATION OF SYSTEMIC ARTERIAL BLOOD PRESSURE BY HORMONE%GOBP%GO:0001990	REGULATION OF SYSTEMIC ARTERIAL BLOOD PRESSURE BY HORMONE%GOBP%GO:0001990		15	-0.461947	-1.46836	0.0595099	0.220093	1	923	tags=60%, list=30%, signal=85%
HALLMARK_ANGIOGENESIS%MSIGDB_C2%HALLMARK_ANGIOGENESIS	HALLMARK_ANGIOGENESIS%MSIGDB_C2%HALLMARK_ANGIOGENESIS		16	-0.463374	-1.46776	0.0606061	0.220291	1	843	tags=50%, list=27%, signal=68%
POSITIVE REGULATION OF ACTIN FILAMENT POLYMERIZATION%GOBP%GO:0030838	POSITIVE REGULATION OF ACTIN FILAMENT POLYMERIZATION%GOBP%GO:0030838		16	-0.458709	-1.46742	0.0640732	0.220062	1	818	tags=50%, list=26%, signal=67%
REGULATION OF TUMOR NECROSIS FACTOR PRODUCTION%GOBP%GO:0032680	REGULATION OF TUMOR NECROSIS FACTOR PRODUCTION%GOBP%GO:0032680		27	-0.397904	-1.46675	0.0657895	0.220462	1	1286	tags=67%, list=41%, signal=113%
CELLULAR COMPONENT MORPHOGENESIS%GOBP%GO:0032989	CELLULAR COMPONENT MORPHOGENESIS%GOBP%GO:0032989		170	-0.311279	-1.4666	0.004	0.21998	1	617	tags=31%, list=20%, signal=36%
CARDIAC VENTRICLE MORPHOGENESIS%GOBP%GO:0003208	CARDIAC VENTRICLE MORPHOGENESIS%GOBP%GO:0003208		21	-0.416105	-1.46568	0.0625	0.220638	1	1206	tags=62%, list=39%, signal=100%
REGULATION OF CARDIAC CONDUCTION%GOBP%GO:1903779	REGULATION OF CARDIAC CONDUCTION%GOBP%GO:1903779		25	-0.407596	-1.46464	0.0564159	0.221544	1	515	tags=32%, list=17%, signal=38%
NEGATIVE REGULATION OF DEFENSE RESPONSE%GOBP%GO:0031348	NEGATIVE REGULATION OF DEFENSE RESPONSE%GOBP%GO:0031348		37	-0.373003	-1.46349	0.0470219	0.222734	1	1287	tags=59%, list=41%, signal=100%
BIOCARTA_NO1_PATHWAY%MSIGDB_C2%BIOCARTA_NO1_PATHWAY	BIOCARTA_NO1_PATHWAY%MSIGDB_C2%BIOCARTA_NO1_PATHWAY		16	-0.445489	-1.462	0.0671296	0.224482	1	187	tags=25%, list=6%, signal=26%
LEUKOCYTE MIGRATION%GOBP%GO:0050900	LEUKOCYTE MIGRATION%GOBP%GO:0050900		94	-0.325555	-1.45863	0.0191339	0.229546	1	1454	tags=66%, list=47%, signal=120%
REGULATION OF TRANSPORT%GOBP%GO:0051049	REGULATION OF TRANSPORT%GOBP%GO:0051049		283	-0.3011	-1.45759	0	0.230544	1	1042	tags=44%, list=33%, signal=60%
POSITIVE REGULATION OF RESPONSE TO WOUNDING%GOBP%GO:1903036	POSITIVE REGULATION OF RESPONSE TO WOUNDING%GOBP%GO:1903036		16	-0.445761	-1.45692	0.0586207	0.231027	1	583	tags=38%, list=19%, signal=46%
REGULATION OF PHAGOCYTOSIS%GOBP%GO:0050764	REGULATION OF PHAGOCYTOSIS%GOBP%GO:0050764		24	-0.406718	-1.45323	0.0588235	0.23666	1	1410	tags=71%, list=45%, signal=128%
REGULATION OF ACTIN FILAMENT ORGANIZATION%GOBP%GO:0110053	REGULATION OF ACTIN FILAMENT ORGANIZATION%GOBP%GO:0110053		52	-0.351133	-1.4495	0.0370752	0.242361	1	886	tags=40%, list=28%, signal=55%
CELL CHEMOTAXIS%GOBP%GO:0060326	CELL CHEMOTAXIS%GOBP%GO:0060326		50	-0.345314	-1.44777	0.0403309	0.244655	1	1481	tags=70%, list=48%, signal=131%
ARRHYTHMOGENIC RIGHT VENTRICULAR CARDIOMYOPATHY%WIKIPATHWAYS_20200510%WP2118%HOMO SAPIENS	ARRHYTHMOGENIC RIGHT VENTRICULAR CARDIOMYOPATHY%WIKIPATHWAYS_20200510%WP2118%HOMO SAPIENS		31	-0.386506	-1.44632	0.0598931	0.246267	1	1242	tags=61%, list=40%, signal=101%
LYMPHOCYTE MIGRATION%GOBP%GO:0072676	LYMPHOCYTE MIGRATION%GOBP%GO:0072676		15	-0.450019	-1.44622	0.0757576	0.245672	1	1086	tags=73%, list=35%, signal=112%
POSITIVE REGULATION OF CELL-CELL ADHESION%GOBP%GO:0022409	POSITIVE REGULATION OF CELL-CELL ADHESION%GOBP%GO:0022409		53	-0.348595	-1.44521	0.0402893	0.246731	1	998	tags=49%, list=32%, signal=71%
REGULATION OF TUMOR NECROSIS FACTOR SUPERFAMILY CYTOKINE PRODUCTION%GOBP%GO:1903555	REGULATION OF TUMOR NECROSIS FACTOR SUPERFAMILY CYTOKINE PRODUCTION%GOBP%GO:1903555		28	-0.390742	-1.44505	0.0582524	0.246192	1	1326	tags=68%, list=43%, signal=117%
POSITIVE REGULATION OF CYTOSKELETON ORGANIZATION%GOBP%GO:0051495	POSITIVE REGULATION OF CYTOSKELETON ORGANIZATION%GOBP%GO:0051495		41	-0.359741	-1.4442	0.0516529	0.246964	1	886	tags=44%, list=28%, signal=61%
REGULATION OF MUSCLE ORGAN DEVELOPMENT%GOBP%GO:0048634	REGULATION OF MUSCLE ORGAN DEVELOPMENT%GOBP%GO:0048634		20	-0.418163	-1.44272	0.0671982	0.248645	1	1142	tags=60%, list=37%, signal=94%
CARDIAC CHAMBER DEVELOPMENT%GOBP%GO:0003205	CARDIAC CHAMBER DEVELOPMENT%GOBP%GO:0003205		31	-0.382436	-1.44002	0.0675966	0.252596	1	1447	tags=68%, list=46%, signal=125%
NEUROTRANSMITTER TRANSPORT%GOBP%GO:0006836	NEUROTRANSMITTER TRANSPORT%GOBP%GO:0006836		28	-0.393668	-1.43774	0.0691892	0.255772	1	878	tags=46%, list=28%, signal=64%
REGULATION OF TRANS-SYNAPTIC SIGNALING%GOBP%GO:0099177	REGULATION OF TRANS-SYNAPTIC SIGNALING%GOBP%GO:0099177		60	-0.339607	-1.43616	0.0440574	0.257962	1	1331	tags=60%, list=43%, signal=103%
NERVOUS SYSTEM PROCESS%GOBP%GO:0050877	NERVOUS SYSTEM PROCESS%GOBP%GO:0050877		94	-0.319531	-1.43611	0.0202429	0.257242	1	1189	tags=50%, list=38%, signal=78%
ALZHEIMER DISEASE-PRESENILIN PATHWAY%PANTHER PATHWAY%P00004	ALZHEIMER DISEASE-PRESENILIN PATHWAY%PANTHER PATHWAY%P00004		32	-0.378777	-1.43603	0.0643087	0.256588	1	401	tags=28%, list=13%, signal=32%
CELLULAR RESPONSE TO HORMONE STIMULUS%GOBP%GO:0032870	CELLULAR RESPONSE TO HORMONE STIMULUS%GOBP%GO:0032870		76	-0.330378	-1.43589	0.0302419	0.256023	1	1066	tags=45%, list=34%, signal=66%
CARDIAC CONDUCTION%GOBP%GO:0061337	CARDIAC CONDUCTION%GOBP%GO:0061337		31	-0.38275	-1.43508	0.0590717	0.256653	1	1155	tags=58%, list=37%, signal=91%
MUSCLE TISSUE MORPHOGENESIS%GOBP%GO:0060415	MUSCLE TISSUE MORPHOGENESIS%GOBP%GO:0060415		19	-0.417673	-1.43221	0.0828604	0.261197	1	1206	tags=63%, list=39%, signal=102%
MYOMETRIAL RELAXATION AND CONTRACTION PATHWAYS%WIKIPATHWAYS_20200510%WP289%HOMO SAPIENS	MYOMETRIAL RELAXATION AND CONTRACTION PATHWAYS%WIKIPATHWAYS_20200510%WP289%HOMO SAPIENS		48	-0.345947	-1.43195	0.0585216	0.260844	1	296	tags=21%, list=9%, signal=23%
REGULATION OF ACTIN FILAMENT POLYMERIZATION%GOBP%GO:0030833	REGULATION OF ACTIN FILAMENT POLYMERIZATION%GOBP%GO:0030833		26	-0.396413	-1.43145	0.0567067	0.260999	1	886	tags=46%, list=28%, signal=64%
GLYCOSAMINOGLYCAN METABOLISM%REACTOME%R-HSA-1630316.2	GLYCOSAMINOGLYCAN METABOLISM%REACTOME%R-HSA-1630316.2		32	-0.37143	-1.43134	0.0722635	0.260407	1	427	tags=28%, list=14%, signal=32%
RESPONSE TO ANTIBIOTIC%GOBP%GO:0046677	RESPONSE TO ANTIBIOTIC%GOBP%GO:0046677		19	-0.419618	-1.4311	0.0782509	0.260067	1	1454	tags=74%, list=47%, signal=137%
POSITIVE REGULATION OF B CELL ACTIVATION%GOBP%GO:0050871	POSITIVE REGULATION OF B CELL ACTIVATION%GOBP%GO:0050871		17	-0.436949	-1.43082	0.0841866	0.259716	1	1624	tags=88%, list=52%, signal=183%
REGULATION OF ACTIN FILAMENT LENGTH%GOBP%GO:0030832	REGULATION OF ACTIN FILAMENT LENGTH%GOBP%GO:0030832		34	-0.376585	-1.43048	0.0539683	0.259542	1	886	tags=44%, list=28%, signal=61%
ADHERENS JUNCTION ORGANIZATION%GOBP%GO:0034332	ADHERENS JUNCTION ORGANIZATION%GOBP%GO:0034332		24	-0.403545	-1.42826	0.0722892	0.262831	1	617	tags=42%, list=20%, signal=52%
REGULATION OF FAT CELL DIFFERENTIATION%GOBP%GO:0045598	REGULATION OF FAT CELL DIFFERENTIATION%GOBP%GO:0045598		21	-0.410766	-1.42826	0.0755556	0.262034	1	377	tags=33%, list=12%, signal=38%
NERVOUS SYSTEM DEVELOPMENT%REACTOME DATABASE ID RELEASE 72%9675108	NERVOUS SYSTEM DEVELOPMENT%REACTOME DATABASE ID RELEASE 72%9675108		100	-0.31275	-1.42798	0.0251256	0.261743	1	1252	tags=50%, list=40%, signal=81%
PROSTAGLANDIN SYNTHESIS AND REGULATION%WIKIPATHWAYS_20200510%WP98%HOMO SAPIENS	PROSTAGLANDIN SYNTHESIS AND REGULATION%WIKIPATHWAYS_20200510%WP98%HOMO SAPIENS		21	-0.414471	-1.4217	0.0795964	0.272557	1	1025	tags=52%, list=33%, signal=78%
REGULATION OF CHEMOKINE PRODUCTION%GOBP%GO:0032642	REGULATION OF CHEMOKINE PRODUCTION%GOBP%GO:0032642		15	-0.443271	-1.42169	0.0704388	0.271749	1	1009	tags=60%, list=32%, signal=88%
INTERFERON GAMMA SIGNALING%REACTOME DATABASE ID RELEASE 72%877300	INTERFERON GAMMA SIGNALING%REACTOME DATABASE ID RELEASE 72%877300		23	-0.40385	-1.42162	0.0776053	0.271088	1	657	tags=39%, list=21%, signal=49%
FC-EPSILON RECEPTOR SIGNALING PATHWAY%GOBP%GO:0038095	FC-EPSILON RECEPTOR SIGNALING PATHWAY%GOBP%GO:0038095		16	-0.436011	-1.42052	0.0837156	0.272398	1	955	tags=56%, list=31%, signal=81%
ANATOMICAL STRUCTURE MATURATION%GOBP%GO:0071695	ANATOMICAL STRUCTURE MATURATION%GOBP%GO:0071695		16	-0.4405	-1.42024	0.0746446	0.272042	1	579	tags=44%, list=19%, signal=53%
REGULATION OF STRIATED MUSCLE TISSUE DEVELOPMENT%GOBP%GO:0016202	REGULATION OF STRIATED MUSCLE TISSUE DEVELOPMENT%GOBP%GO:0016202		20	-0.418163	-1.41896	0.0795848	0.273645	1	1142	tags=60%, list=37%, signal=94%
OUTFLOW TRACT MORPHOGENESIS%GOBP%GO:0003151	OUTFLOW TRACT MORPHOGENESIS%GOBP%GO:0003151		19	-0.421898	-1.41864	0.0804196	0.27349	1	1501	tags=79%, list=48%, signal=151%
POSITIVE REGULATION OF RESPONSE TO EXTERNAL STIMULUS%GOBP%GO:0032103	POSITIVE REGULATION OF RESPONSE TO EXTERNAL STIMULUS%GOBP%GO:0032103		64	-0.329751	-1.41796	0.0609756	0.273925	1	390	tags=28%, list=13%, signal=31%
NEGATIVE REGULATION OF CYTOKINE PRODUCTION%GOBP%GO:0001818	NEGATIVE REGULATION OF CYTOKINE PRODUCTION%GOBP%GO:0001818		45	-0.350707	-1.41657	0.0641158	0.275775	1	1042	tags=49%, list=33%, signal=72%
REGULATION OF POTASSIUM ION TRANSPORT%GOBP%GO:0043266	REGULATION OF POTASSIUM ION TRANSPORT%GOBP%GO:0043266		19	-0.418467	-1.41638	0.078341	0.275333	1	1141	tags=63%, list=37%, signal=99%
SIGNAL RELEASE%GOBP%GO:0023061	SIGNAL RELEASE%GOBP%GO:0023061		22	-0.407344	-1.41596	0.0826816	0.275298	1	1238	tags=64%, list=40%, signal=105%
REGULATION OF CYTOKINE SECRETION%GOBP%GO:0050707	REGULATION OF CYTOKINE SECRETION%GOBP%GO:0050707		36	-0.369523	-1.41524	0.0587607	0.275926	1	1087	tags=56%, list=35%, signal=84%
REGULATION OF TRANSPORTER ACTIVITY%GOBP%GO:0032409	REGULATION OF TRANSPORTER ACTIVITY%GOBP%GO:0032409		56	-0.334294	-1.4119	0.0501023	0.281458	1	1475	tags=63%, list=47%, signal=117%
B CELL RECEPTOR SIGNALING PATHWAY%GOBP%GO:0050853	B CELL RECEPTOR SIGNALING PATHWAY%GOBP%GO:0050853		21	-0.412356	-1.41177	0.0869074	0.280872	1	1646	tags=86%, list=53%, signal=180%
ECM PROTEOGLYCANS%REACTOME%R-HSA-3000178.3	ECM PROTEOGLYCANS%REACTOME%R-HSA-3000178.3		21	-0.402058	-1.41077	0.10179	0.28212	1	707	tags=43%, list=23%, signal=55%
TNFALPHA%NETPATH%TNFALPHA	TNFALPHA%NETPATH%TNFALPHA		22	-0.408369	-1.41051	0.0974771	0.281799	1	533	tags=27%, list=17%, signal=33%
HOMEOSTATIC PROCESS%GOBP%GO:0042592	HOMEOSTATIC PROCESS%GOBP%GO:0042592		241	-0.292636	-1.40983	0.004	0.282291	1	1053	tags=43%, list=34%, signal=60%
POSITIVE REGULATION OF SUPRAMOLECULAR FIBER ORGANIZATION%GOBP%GO:1902905	POSITIVE REGULATION OF SUPRAMOLECULAR FIBER ORGANIZATION%GOBP%GO:1902905		37	-0.361522	-1.40963	0.0591341	0.281798	1	818	tags=41%, list=26%, signal=54%
CHEMICAL HOMEOSTASIS%GOBP%GO:0048878	CHEMICAL HOMEOSTASIS%GOBP%GO:0048878		186	-0.29949	-1.4096	0.005	0.281081	1	1053	tags=44%, list=34%, signal=63%
NEGATIVE REGULATION OF SECRETION%GOBP%GO:0051048	NEGATIVE REGULATION OF SECRETION%GOBP%GO:0051048		36	-0.362152	-1.40826	0.0640341	0.282951	1	1042	tags=50%, list=33%, signal=74%
CALCIUM-MEDIATED SIGNALING%GOBP%GO:0019722	CALCIUM-MEDIATED SIGNALING%GOBP%GO:0019722		37	-0.359649	-1.40819	0.0613757	0.282275	1	1475	tags=73%, list=47%, signal=137%
REGULATION OF MUSCLE TISSUE DEVELOPMENT%GOBP%GO:1901861	REGULATION OF MUSCLE TISSUE DEVELOPMENT%GOBP%GO:1901861		20	-0.418163	-1.40755	0.0846501	0.282576	1	1142	tags=60%, list=37%, signal=94%
NEGATIVE REGULATION OF SECRETION BY CELL%GOBP%GO:1903531	NEGATIVE REGULATION OF SECRETION BY CELL%GOBP%GO:1903531		34	-0.361661	-1.40472	0.071579	0.287216	1	1042	tags=50%, list=33%, signal=74%
INTEGRIN FAMILY CELL SURFACE INTERACTIONS%PATHWAY INTERACTION DATABASE NCI-NATURE CURATED DATA%INTEGRIN FAMILY CELL SURFACE INTERACTIONS	INTEGRIN FAMILY CELL SURFACE INTERACTIONS%PATHWAY INTERACTION DATABASE NCI-NATURE CURATED DATA%INTEGRIN FAMILY CELL SURFACE INTERACTIONS		15	-0.437293	-1.4046	0.0968123	0.286632	1	1446	tags=80%, list=46%, signal=149%
HIPPO-MERLIN SIGNALING DYSREGULATION%WIKIPATHWAYS_20200510%WP4541%HOMO SAPIENS	HIPPO-MERLIN SIGNALING DYSREGULATION%WIKIPATHWAYS_20200510%WP4541%HOMO SAPIENS		47	-0.343279	-1.40454	0.0530697	0.285968	1	1530	tags=68%, list=49%, signal=132%
INORGANIC ANION TRANSPORT%GOBP%GO:0015698	INORGANIC ANION TRANSPORT%GOBP%GO:0015698		18	-0.421754	-1.40207	0.0811725	0.290037	1	1115	tags=61%, list=36%, signal=95%
RESPONSE TO TRANSFORMING GROWTH FACTOR BETA%GOBP%GO:0071559	RESPONSE TO TRANSFORMING GROWTH FACTOR BETA%GOBP%GO:0071559		31	-0.367375	-1.40176	0.0842333	0.289861	1	1469	tags=71%, list=47%, signal=133%
REGULATION OF MYELOID LEUKOCYTE DIFFERENTIATION%GOBP%GO:0002761	REGULATION OF MYELOID LEUKOCYTE DIFFERENTIATION%GOBP%GO:0002761		19	-0.414564	-1.39929	0.0881007	0.293808	1	1080	tags=58%, list=35%, signal=88%
GPCRS, OTHER%WIKIPATHWAYS_20200510%WP117%HOMO SAPIENS	GPCRS, OTHER%WIKIPATHWAYS_20200510%WP117%HOMO SAPIENS		23	-0.404799	-1.39921	0.0940649	0.293143	1	1119	tags=61%, list=36%, signal=94%
MUSCLE ORGAN MORPHOGENESIS%GOBP%GO:0048644	MUSCLE ORGAN MORPHOGENESIS%GOBP%GO:0048644		19	-0.417673	-1.39899	0.0966292	0.292734	1	1206	tags=63%, list=39%, signal=102%
CIRCULATORY SYSTEM DEVELOPMENT%GOBP%GO:0072359	CIRCULATORY SYSTEM DEVELOPMENT%GOBP%GO:0072359		150	-0.298129	-1.39826	0.025025	0.293487	1	1501	tags=61%, list=48%, signal=111%
ICOSANOID METABOLIC PROCESS%GOBP%GO:0006690	ICOSANOID METABOLIC PROCESS%GOBP%GO:0006690		17	-0.424903	-1.3982	0.1	0.292766	1	419	tags=35%, list=13%, signal=41%
HOMOPHILIC CELL ADHESION VIA PLASMA MEMBRANE ADHESION MOLECULES%GOBP%GO:0007156	HOMOPHILIC CELL ADHESION VIA PLASMA MEMBRANE ADHESION MOLECULES%GOBP%GO:0007156		28	-0.381251	-1.39782	0.0859291	0.292753	1	617	tags=39%, list=20%, signal=49%
POSITIVE REGULATION OF ADAPTIVE IMMUNE RESPONSE%GOBP%GO:0002821	POSITIVE REGULATION OF ADAPTIVE IMMUNE RESPONSE%GOBP%GO:0002821		17	-0.424163	-1.39493	0.0888383	0.297983	1	1256	tags=65%, list=40%, signal=108%
ION CHANNEL TRANSPORT%REACTOME%R-HSA-983712.2	ION CHANNEL TRANSPORT%REACTOME%R-HSA-983712.2		34	-0.360487	-1.39485	0.0921466	0.297313	1	430	tags=26%, list=14%, signal=30%
POSITIVE REGULATION OF SECRETION%GOBP%GO:0051047	POSITIVE REGULATION OF SECRETION%GOBP%GO:0051047		68	-0.324109	-1.39398	0.0515152	0.298361	1	1035	tags=51%, list=33%, signal=75%
ANTIGEN PROCESSING AND PRESENTATION OF PEPTIDE ANTIGEN%GOBP%GO:0048002	ANTIGEN PROCESSING AND PRESENTATION OF PEPTIDE ANTIGEN%GOBP%GO:0048002		32	-0.369958	-1.39335	0.0985916	0.298824	1	1061	tags=50%, list=34%, signal=75%
PID_TCR_PATHWAY%MSIGDB_C2%PID_TCR_PATHWAY	PID_TCR_PATHWAY%MSIGDB_C2%PID_TCR_PATHWAY		20	-0.414781	-1.39224	0.0928412	0.300218	1	991	tags=55%, list=32%, signal=80%
COMPLEMENT AND COAGULATION CASCADES%WIKIPATHWAYS_20200510%WP558%HOMO SAPIENS	COMPLEMENT AND COAGULATION CASCADES%WIKIPATHWAYS_20200510%WP558%HOMO SAPIENS		23	-0.397847	-1.38994	0.0852018	0.304081	1	139	tags=26%, list=4%, signal=27%
FOCAL ADHESION-PI3K-AKT-MTOR-SIGNALING PATHWAY%WIKIPATHWAYS_20200510%WP3932%HOMO SAPIENS	FOCAL ADHESION-PI3K-AKT-MTOR-SIGNALING PATHWAY%WIKIPATHWAYS_20200510%WP3932%HOMO SAPIENS		82	-0.315485	-1.3894	0.0414141	0.304413	1	1542	tags=66%, list=49%, signal=127%
RESPONSE TO HORMONE%GOBP%GO:0009725	RESPONSE TO HORMONE%GOBP%GO:0009725		94	-0.309418	-1.38929	0.0482897	0.30382	1	1066	tags=43%, list=34%, signal=63%
CALCIUM ION TRANSMEMBRANE TRANSPORT%GOBP%GO:0070588	CALCIUM ION TRANSMEMBRANE TRANSPORT%GOBP%GO:0070588		33	-0.356728	-1.38893	0.0843116	0.303796	1	1583	tags=73%, list=51%, signal=146%
AMINOGLYCAN CATABOLIC PROCESS%GOBP%GO:0006026	AMINOGLYCAN CATABOLIC PROCESS%GOBP%GO:0006026		22	-0.391149	-1.3885	0.100559	0.303926	1	159	tags=23%, list=5%, signal=24%
TCR SIGNALING IN NAIVE CD4+ T CELLS%PATHWAY INTERACTION DATABASE NCI-NATURE CURATED DATA%TCR SIGNALING IN NAIVE CD4+ T CELLS	TCR SIGNALING IN NAIVE CD4+ T CELLS%PATHWAY INTERACTION DATABASE NCI-NATURE CURATED DATA%TCR SIGNALING IN NAIVE CD4+ T CELLS		20	-0.414781	-1.38744	0.108889	0.305165	1	991	tags=55%, list=32%, signal=80%
REGULATION OF LEUKOCYTE DIFFERENTIATION%GOBP%GO:1902105	REGULATION OF LEUKOCYTE DIFFERENTIATION%GOBP%GO:1902105		48	-0.334503	-1.38685	0.0771637	0.305616	1	1612	tags=71%, list=52%, signal=144%
REGULATION OF NEUROTRANSMITTER LEVELS%GOBP%GO:0001505	REGULATION OF NEUROTRANSMITTER LEVELS%GOBP%GO:0001505		48	-0.337738	-1.38417	0.0754132	0.310377	1	1017	tags=44%, list=33%, signal=64%
CELLULAR RESPONSE TO LIPID%GOBP%GO:0071396	CELLULAR RESPONSE TO LIPID%GOBP%GO:0071396		76	-0.317881	-1.38288	0.0538071	0.31226	1	1357	tags=57%, list=44%, signal=98%
PID_INTEGRIN_CS_PATHWAY%MSIGDB_C2%PID_INTEGRIN_CS_PATHWAY	PID_INTEGRIN_CS_PATHWAY%MSIGDB_C2%PID_INTEGRIN_CS_PATHWAY		15	-0.437293	-1.3826	0.105701	0.312015	1	1446	tags=80%, list=46%, signal=149%
ANTIGEN PROCESSING AND PRESENTATION%GOBP%GO:0019882	ANTIGEN PROCESSING AND PRESENTATION%GOBP%GO:0019882		38	-0.354351	-1.38155	0.0893796	0.313469	1	957	tags=47%, list=31%, signal=68%
CELLULAR RESPONSE TO TRANSFORMING GROWTH FACTOR BETA STIMULUS%GOBP%GO:0071560	CELLULAR RESPONSE TO TRANSFORMING GROWTH FACTOR BETA STIMULUS%GOBP%GO:0071560		31	-0.367375	-1.37961	0.0902335	0.316534	1	1469	tags=71%, list=47%, signal=133%
REGULATION OF IGF ACTIVITY BY IGFBP%REACTOME%R-HSA-381426.2	REGULATION OF IGF ACTIVITY BY IGFBP%REACTOME%R-HSA-381426.2		33	-0.358678	-1.37494	0.0919913	0.325671	1	410	tags=30%, list=13%, signal=35%
PI3K-AKT SIGNALING PATHWAY%WIKIPATHWAYS_20200510%WP4172%HOMO SAPIENS	PI3K-AKT SIGNALING PATHWAY%WIKIPATHWAYS_20200510%WP4172%HOMO SAPIENS		89	-0.309536	-1.37463	0.0466059	0.325466	1	1542	tags=65%, list=49%, signal=125%
POSITIVE REGULATION OF MYELOID CELL DIFFERENTIATION%GOBP%GO:0045639	POSITIVE REGULATION OF MYELOID CELL DIFFERENTIATION%GOBP%GO:0045639		17	-0.422718	-1.37441	0.0876586	0.325098	1	991	tags=53%, list=32%, signal=77%
SUPRAMOLECULAR FIBER ORGANIZATION%GOBP%GO:0097435	SUPRAMOLECULAR FIBER ORGANIZATION%GOBP%GO:0097435		103	-0.30532	-1.37419	0.03125	0.324704	1	876	tags=33%, list=28%, signal=44%
POSITIVE REGULATION OF CELL DIFFERENTIATION%GOBP%GO:0045597	POSITIVE REGULATION OF CELL DIFFERENTIATION%GOBP%GO:0045597		186	-0.291695	-1.37216	0.013013	0.328	1	1278	tags=50%, list=41%, signal=80%
MYELOID CELL DIFFERENTIATION%GOBP%GO:0030099	MYELOID CELL DIFFERENTIATION%GOBP%GO:0030099		30	-0.365786	-1.37195	0.0841424	0.327623	1	1510	tags=70%, list=48%, signal=134%
RESPONSE TO ENDOGENOUS STIMULUS%GOBP%GO:0009719	RESPONSE TO ENDOGENOUS STIMULUS%GOBP%GO:0009719		187	-0.288219	-1.37129	0.021	0.32818	1	1319	tags=50%, list=42%, signal=81%
G ALPHA (Z) SIGNALLING EVENTS%REACTOME DATABASE ID RELEASE 72%418597	G ALPHA (Z) SIGNALLING EVENTS%REACTOME DATABASE ID RELEASE 72%418597		15	-0.435048	-1.37103	0.111511	0.327953	1	1236	tags=73%, list=40%, signal=121%
NEGATIVE REGULATION OF LEUKOCYTE ACTIVATION%GOBP%GO:0002695	NEGATIVE REGULATION OF LEUKOCYTE ACTIVATION%GOBP%GO:0002695		31	-0.361288	-1.36826	0.109208	0.333116	1	939	tags=45%, list=30%, signal=64%
CELLULAR RESPONSE TO ENDOGENOUS STIMULUS%GOBP%GO:0071495	CELLULAR RESPONSE TO ENDOGENOUS STIMULUS%GOBP%GO:0071495		165	-0.28877	-1.36803	0.027	0.332821	1	1310	tags=50%, list=42%, signal=81%
TAXIS%GOBP%GO:0042330	TAXIS%GOBP%GO:0042330		115	-0.295472	-1.36676	0.0512048	0.334826	1	1511	tags=63%, list=48%, signal=117%
GENERATION OF PRECURSOR METABOLITES AND ENERGY%GOBP%GO:0006091	GENERATION OF PRECURSOR METABOLITES AND ENERGY%GOBP%GO:0006091		31	-0.358988	-1.36516	0.108197	0.337483	1	1357	tags=58%, list=44%, signal=102%
REGULATION OF OSTEOBLAST DIFFERENTIATION%GOBP%GO:0045667	REGULATION OF OSTEOBLAST DIFFERENTIATION%GOBP%GO:0045667		24	-0.382634	-1.36498	0.110742	0.336977	1	1278	tags=58%, list=41%, signal=98%
RESPONSE TO CALCIUM ION%GOBP%GO:0051592	RESPONSE TO CALCIUM ION%GOBP%GO:0051592		24	-0.382081	-1.36465	0.111232	0.336883	1	878	tags=54%, list=28%, signal=75%
NEGATIVE REGULATION OF TRANSPORT%GOBP%GO:0051051	NEGATIVE REGULATION OF TRANSPORT%GOBP%GO:0051051		74	-0.315359	-1.36456	0.0626896	0.336241	1	1042	tags=43%, list=33%, signal=63%
RESPONSE TO FATTY ACID%GOBP%GO:0070542	RESPONSE TO FATTY ACID%GOBP%GO:0070542		16	-0.418592	-1.36438	0.122706	0.335814	1	920	tags=56%, list=30%, signal=79%
REGULATION OF GRANULOCYTE CHEMOTAXIS%GOBP%GO:0071622	REGULATION OF GRANULOCYTE CHEMOTAXIS%GOBP%GO:0071622		15	-0.438747	-1.36137	0.113095	0.341315	1	390	tags=40%, list=13%, signal=46%
CARDIAC MUSCLE TISSUE MORPHOGENESIS%GOBP%GO:0055008	CARDIAC MUSCLE TISSUE MORPHOGENESIS%GOBP%GO:0055008		18	-0.406529	-1.36063	0.118778	0.34209	1	331	tags=28%, list=11%, signal=31%
MUCOPOLYSACCHARIDE METABOLIC PROCESS%GOBP%GO:1903510	MUCOPOLYSACCHARIDE METABOLIC PROCESS%GOBP%GO:1903510		21	-0.39317	-1.35966	0.11745	0.343335	1	427	tags=29%, list=14%, signal=33%
DETECTION OF STIMULUS%GOBP%GO:0051606	DETECTION OF STIMULUS%GOBP%GO:0051606		33	-0.355449	-1.35862	0.105042	0.344707	1	1417	tags=70%, list=45%, signal=126%
GLYCOSAMINOGLYCAN CATABOLIC PROCESS%GOBP%GO:0006027	GLYCOSAMINOGLYCAN CATABOLIC PROCESS%GOBP%GO:0006027		22	-0.391149	-1.35809	0.0952381	0.345017	1	159	tags=23%, list=5%, signal=24%
CELLULAR RESPONSE TO INORGANIC SUBSTANCE%GOBP%GO:0071241	CELLULAR RESPONSE TO INORGANIC SUBSTANCE%GOBP%GO:0071241		30	-0.355736	-1.35638	0.101842	0.34805	1	1238	tags=57%, list=40%, signal=93%
CELLULAR RESPONSE TO ORGANIC CYCLIC COMPOUND%GOBP%GO:0071407	CELLULAR RESPONSE TO ORGANIC CYCLIC COMPOUND%GOBP%GO:0071407		60	-0.318534	-1.35243	0.0744898	0.356149	1	644	tags=30%, list=21%, signal=37%
CELLULAR RESPONSE TO TUMOR NECROSIS FACTOR%GOBP%GO:0071356	CELLULAR RESPONSE TO TUMOR NECROSIS FACTOR%GOBP%GO:0071356		21	-0.3904	-1.34806	0.120536	0.365311	1	965	tags=48%, list=31%, signal=69%
REGULATION OF OSSIFICATION%GOBP%GO:0030278	REGULATION OF OSSIFICATION%GOBP%GO:0030278		42	-0.333855	-1.34747	0.0986501	0.365739	1	1278	tags=52%, list=41%, signal=88%
CHEMOTAXIS%GOBP%GO:0006935	CHEMOTAXIS%GOBP%GO:0006935		115	-0.295472	-1.34658	0.0482412	0.366887	1	1511	tags=63%, list=48%, signal=117%
MESENCHYME DEVELOPMENT%GOBP%GO:0060485	MESENCHYME DEVELOPMENT%GOBP%GO:0060485		42	-0.335666	-1.34618	0.103233	0.366967	1	1284	tags=60%, list=41%, signal=100%
POSITIVE REGULATION OF RESPONSE TO STIMULUS%GOBP%GO:0048584	POSITIVE REGULATION OF RESPONSE TO STIMULUS%GOBP%GO:0048584		426	-0.270911	-1.34354	0.003	0.372166	1	1009	tags=39%, list=32%, signal=50%
L1CAM INTERACTIONS%REACTOME DATABASE ID RELEASE 72%373760	L1CAM INTERACTIONS%REACTOME DATABASE ID RELEASE 72%373760		17	-0.416652	-1.34172	0.116226	0.375304	1	1157	tags=59%, list=37%, signal=93%
PID_AMB2_NEUTROPHILS_PATHWAY%MSIGDB_C2%PID_AMB2_NEUTROPHILS_PATHWAY	PID_AMB2_NEUTROPHILS_PATHWAY%MSIGDB_C2%PID_AMB2_NEUTROPHILS_PATHWAY		16	-0.421758	-1.34171	0.114352	0.374413	1	1431	tags=75%, list=46%, signal=138%
REGULATION OF CHEMOTAXIS%GOBP%GO:0050920	REGULATION OF CHEMOTAXIS%GOBP%GO:0050920		48	-0.323659	-1.34161	0.112033	0.373756	1	1491	tags=67%, list=48%, signal=126%
ADHERENS JUNCTIONS INTERACTIONS%REACTOME%R-HSA-418990.2	ADHERENS JUNCTIONS INTERACTIONS%REACTOME%R-HSA-418990.2		16	-0.421924	-1.34152	0.130787	0.373028	1	617	tags=44%, list=20%, signal=54%
PID_ILK_PATHWAY%MSIGDB_C2%PID_ILK_PATHWAY	PID_ILK_PATHWAY%MSIGDB_C2%PID_ILK_PATHWAY		15	-0.427995	-1.34141	0.130332	0.372365	1	348	tags=27%, list=11%, signal=30%
REGULATION OF T CELL MEDIATED IMMUNITY%GOBP%GO:0002709	REGULATION OF T CELL MEDIATED IMMUNITY%GOBP%GO:0002709		15	-0.419654	-1.33768	0.133728	0.38006	1	1256	tags=67%, list=40%, signal=111%
REGULATION OF INTERLEUKIN-8 PRODUCTION%GOBP%GO:0032677	REGULATION OF INTERLEUKIN-8 PRODUCTION%GOBP%GO:0032677		19	-0.399772	-1.33765	0.11851	0.379227	1	1031	tags=53%, list=33%, signal=78%
PID_ARF6_TRAFFICKING_PATHWAY%MSIGDB_C2%PID_ARF6_TRAFFICKING_PATHWAY	PID_ARF6_TRAFFICKING_PATHWAY%MSIGDB_C2%PID_ARF6_TRAFFICKING_PATHWAY		16	-0.413628	-1.33483	0.124854	0.384967	1	1242	tags=69%, list=40%, signal=114%
PARASITE INFECTION%REACTOME%R-HSA-9664407.1	PARASITE INFECTION%REACTOME%R-HSA-9664407.1		18	-0.396742	-1.33222	0.130939	0.390201	1	743	tags=39%, list=24%, signal=51%
VENTRICULAR CARDIAC MUSCLE TISSUE DEVELOPMENT%GOBP%GO:0003229	VENTRICULAR CARDIAC MUSCLE TISSUE DEVELOPMENT%GOBP%GO:0003229		15	-0.418966	-1.33193	0.123501	0.390002	1	331	tags=27%, list=11%, signal=30%
HETEROPHILIC CELL-CELL ADHESION VIA PLASMA MEMBRANE CELL ADHESION MOLECULES%GOBP%GO:0007157	HETEROPHILIC CELL-CELL ADHESION VIA PLASMA MEMBRANE CELL ADHESION MOLECULES%GOBP%GO:0007157		20	-0.389473	-1.3294	0.130682	0.395123	1	1247	tags=65%, list=40%, signal=108%
BONE DEVELOPMENT%GOBP%GO:0060348	BONE DEVELOPMENT%GOBP%GO:0060348		30	-0.354901	-1.32773	0.120985	0.398254	1	755	tags=40%, list=24%, signal=52%
POSITIVE REGULATION OF PROTEIN POLYMERIZATION%GOBP%GO:0032273	POSITIVE REGULATION OF PROTEIN POLYMERIZATION%GOBP%GO:0032273		18	-0.401609	-1.3269	0.12645	0.399279	1	818	tags=44%, list=26%, signal=60%
REGULATION OF CELL-CELL ADHESION%GOBP%GO:0022407	REGULATION OF CELL-CELL ADHESION%GOBP%GO:0022407		80	-0.301295	-1.32647	0.0729483	0.399391	1	1013	tags=44%, list=32%, signal=63%
NABA_ECM_GLYCOPROTEINS%MSIGDB_C2%NABA_ECM_GLYCOPROTEINS	NABA_ECM_GLYCOPROTEINS%MSIGDB_C2%NABA_ECM_GLYCOPROTEINS		78	-0.300201	-1.32372	0.0984772	0.405258	1	1822	tags=81%, list=58%, signal=190%
POSITIVE REGULATION OF IMMUNE EFFECTOR PROCESS%GOBP%GO:0002699	POSITIVE REGULATION OF IMMUNE EFFECTOR PROCESS%GOBP%GO:0002699		40	-0.330225	-1.32359	0.116719	0.404622	1	1326	tags=63%, list=43%, signal=107%
REGULATION OF ACTIN DYNAMICS FOR PHAGOCYTIC CUP FORMATION%REACTOME%R-HSA-2029482.2	REGULATION OF ACTIN DYNAMICS FOR PHAGOCYTIC CUP FORMATION%REACTOME%R-HSA-2029482.2		18	-0.402756	-1.32195	0.152149	0.407611	1	1470	tags=67%, list=47%, signal=125%
POSITIVE REGULATION OF CYTOKINE SECRETION%GOBP%GO:0050715	POSITIVE REGULATION OF CYTOKINE SECRETION%GOBP%GO:0050715		23	-0.370867	-1.32185	0.13253	0.406925	1	1087	tags=57%, list=35%, signal=86%
MOVEMENT OF CELL OR SUBCELLULAR COMPONENT%GOBP%GO:0006928	MOVEMENT OF CELL OR SUBCELLULAR COMPONENT%GOBP%GO:0006928		316	-0.270488	-1.32152	0.011	0.406691	1	1534	tags=58%, list=49%, signal=102%
ANTIGEN PROCESSING AND PRESENTATION OF EXOGENOUS ANTIGEN%GOBP%GO:0019884	ANTIGEN PROCESSING AND PRESENTATION OF EXOGENOUS ANTIGEN%GOBP%GO:0019884		31	-0.351829	-1.32086	0.130248	0.407431	1	947	tags=45%, list=30%, signal=64%
REGULATION OF ACTIN CYTOSKELETON ORGANIZATION%GOBP%GO:0032956	REGULATION OF ACTIN CYTOSKELETON ORGANIZATION%GOBP%GO:0032956		70	-0.303356	-1.3203	0.0804481	0.407849	1	818	tags=36%, list=26%, signal=47%
GLOMERULUS DEVELOPMENT%GOBP%GO:0032835	GLOMERULUS DEVELOPMENT%GOBP%GO:0032835		18	-0.39661	-1.3192	0.13964	0.409443	1	1481	tags=72%, list=48%, signal=137%
LEISHMANIA PHAGOCYTOSIS%REACTOME DATABASE ID RELEASE 72%9664417	LEISHMANIA PHAGOCYTOSIS%REACTOME DATABASE ID RELEASE 72%9664417		18	-0.396742	-1.31878	0.143678	0.409528	1	743	tags=39%, list=24%, signal=51%
CELLULAR RESPONSE TO LIPOPOLYSACCHARIDE%GOBP%GO:0071222	CELLULAR RESPONSE TO LIPOPOLYSACCHARIDE%GOBP%GO:0071222		24	-0.36855	-1.31732	0.152655	0.412116	1	1412	tags=71%, list=45%, signal=128%
CELLULAR RESPONSE TO METAL ION%GOBP%GO:0071248	CELLULAR RESPONSE TO METAL ION%GOBP%GO:0071248		30	-0.355736	-1.31589	0.13612	0.414739	1	1238	tags=57%, list=40%, signal=93%
T CELL ACTIVATION%GOBP%GO:0042110	T CELL ACTIVATION%GOBP%GO:0042110		45	-0.325641	-1.31346	0.116062	0.419777	1	991	tags=47%, list=32%, signal=67%
CLASS B 2 (SECRETIN FAMILY RECEPTORS)%REACTOME DATABASE ID RELEASE 72%373080	CLASS B 2 (SECRETIN FAMILY RECEPTORS)%REACTOME DATABASE ID RELEASE 72%373080		26	-0.355089	-1.31304	0.146961	0.419846	1	1236	tags=58%, list=40%, signal=95%
FCGAMMA RECEPTOR (FCGR) DEPENDENT PHAGOCYTOSIS%REACTOME%R-HSA-2029480.1	FCGAMMA RECEPTOR (FCGR) DEPENDENT PHAGOCYTOSIS%REACTOME%R-HSA-2029480.1		22	-0.373537	-1.31287	0.153422	0.419351	1	1470	tags=64%, list=47%, signal=120%
POSITIVE REGULATION OF ENDOCYTOSIS%GOBP%GO:0045807	POSITIVE REGULATION OF ENDOCYTOSIS%GOBP%GO:0045807		36	-0.339563	-1.31257	0.11746	0.419224	1	1384	tags=61%, list=44%, signal=109%
GLYCOSAMINOGLYCAN BIOSYNTHETIC PROCESS%GOBP%GO:0006024	GLYCOSAMINOGLYCAN BIOSYNTHETIC PROCESS%GOBP%GO:0006024		25	-0.366605	-1.31159	0.148268	0.420847	1	427	tags=28%, list=14%, signal=32%
PHOSPHATIDYLINOSITOL METABOLIC PROCESS%GOBP%GO:0046488	PHOSPHATIDYLINOSITOL METABOLIC PROCESS%GOBP%GO:0046488		21	-0.386398	-1.30997	0.158427	0.423911	1	567	tags=33%, list=18%, signal=40%
REGULATION OF PHOSPHATASE ACTIVITY%GOBP%GO:0010921	REGULATION OF PHOSPHATASE ACTIVITY%GOBP%GO:0010921		17	-0.395752	-1.30767	0.16	0.428732	1	823	tags=41%, list=26%, signal=56%
RESPONSE TO LIPID%GOBP%GO:0033993	RESPONSE TO LIPID%GOBP%GO:0033993		106	-0.28783	-1.30765	0.0922768	0.427814	1	817	tags=35%, list=26%, signal=46%
REGULATION OF CARDIAC MUSCLE CONTRACTION%GOBP%GO:0055117	REGULATION OF CARDIAC MUSCLE CONTRACTION%GOBP%GO:0055117		26	-0.359921	-1.30206	0.149336	0.441141	1	405	tags=27%, list=13%, signal=31%
CELLULAR RESPONSE TO MOLECULE OF BACTERIAL ORIGIN%GOBP%GO:0071219	CELLULAR RESPONSE TO MOLECULE OF BACTERIAL ORIGIN%GOBP%GO:0071219		26	-0.360813	-1.3014	0.134509	0.44198	1	1009	tags=54%, list=32%, signal=79%
HALLMARK_IL2_STAT5_SIGNALING%MSIGDB_C2%HALLMARK_IL2_STAT5_SIGNALING	HALLMARK_IL2_STAT5_SIGNALING%MSIGDB_C2%HALLMARK_IL2_STAT5_SIGNALING		56	-0.311183	-1.30132	0.112953	0.441198	1	1376	tags=54%, list=44%, signal=94%
REGULATION OF ENDOCYTOSIS%GOBP%GO:0030100	REGULATION OF ENDOCYTOSIS%GOBP%GO:0030100		54	-0.311241	-1.3008	0.12449	0.441631	1	1410	tags=57%, list=45%, signal=103%
CHLORIDE TRANSPORT%GOBP%GO:0006821	CHLORIDE TRANSPORT%GOBP%GO:0006821		15	-0.418932	-1.30061	0.167849	0.441118	1	1115	tags=60%, list=36%, signal=93%
REGULATION OF ACTIN FILAMENT-BASED PROCESS%GOBP%GO:0032970	REGULATION OF ACTIN FILAMENT-BASED PROCESS%GOBP%GO:0032970		87	-0.293037	-1.30041	0.0938446	0.440574	1	773	tags=33%, list=25%, signal=43%
FCGR3A-MEDIATED PHAGOCYTOSIS%REACTOME%R-HSA-9664422.1	FCGR3A-MEDIATED PHAGOCYTOSIS%REACTOME%R-HSA-9664422.1		18	-0.396742	-1.2992	0.159954	0.442717	1	743	tags=39%, list=24%, signal=51%
CELL-CELL JUNCTION ORGANIZATION%GOBP%GO:0045216	CELL-CELL JUNCTION ORGANIZATION%GOBP%GO:0045216		39	-0.32804	-1.2967	0.147763	0.448328	1	617	tags=33%, list=20%, signal=41%
FC EPSILON RECEPTOR (FCERI) SIGNALING%REACTOME%R-HSA-2454202.1	FC EPSILON RECEPTOR (FCERI) SIGNALING%REACTOME%R-HSA-2454202.1		18	-0.393256	-1.29555	0.172811	0.450315	1	955	tags=50%, list=31%, signal=72%
REGULATION OF RESPONSE TO EXTERNAL STIMULUS%GOBP%GO:0032101	REGULATION OF RESPONSE TO EXTERNAL STIMULUS%GOBP%GO:0032101		165	-0.275243	-1.29492	0.0440882	0.451005	1	1287	tags=51%, list=41%, signal=82%
AMINOGLYCAN BIOSYNTHETIC PROCESS%GOBP%GO:0006023	AMINOGLYCAN BIOSYNTHETIC PROCESS%GOBP%GO:0006023		26	-0.358295	-1.2934	0.147541	0.454031	1	427	tags=27%, list=14%, signal=31%
TRANSMEMBRANE TRANSPORT%GOBP%GO:0055085	TRANSMEMBRANE TRANSPORT%GOBP%GO:0055085		125	-0.283746	-1.29335	0.0661323	0.453204	1	1497	tags=58%, list=48%, signal=108%
REGULATION OF DEFENSE RESPONSE%GOBP%GO:0031347	REGULATION OF DEFENSE RESPONSE%GOBP%GO:0031347		138	-0.278662	-1.29262	0.066	0.45415	1	1287	tags=52%, list=41%, signal=85%
CELL SURFACE INTERACTIONS AT THE VASCULAR WALL%REACTOME%R-HSA-202733.4	CELL SURFACE INTERACTIONS AT THE VASCULAR WALL%REACTOME%R-HSA-202733.4		51	-0.313107	-1.29237	0.134576	0.453796	1	1446	tags=63%, list=46%, signal=115%
POSITIVE REGULATION OF HEMOPOIESIS%GOBP%GO:1903708	POSITIVE REGULATION OF HEMOPOIESIS%GOBP%GO:1903708		32	-0.333022	-1.2893	0.154839	0.460932	1	998	tags=44%, list=32%, signal=64%
DIGESTIVE SYSTEM DEVELOPMENT%GOBP%GO:0055123	DIGESTIVE SYSTEM DEVELOPMENT%GOBP%GO:0055123		19	-0.380469	-1.28895	0.175339	0.460842	1	942	tags=53%, list=30%, signal=75%
GLIAL CELL DIFFERENTIATION%GOBP%GO:0010001	GLIAL CELL DIFFERENTIATION%GOBP%GO:0010001		20	-0.379719	-1.28874	0.168182	0.460341	1	326	tags=25%, list=10%, signal=28%
CELLULAR RESPONSE TO BIOTIC STIMULUS%GOBP%GO:0071216	CELLULAR RESPONSE TO BIOTIC STIMULUS%GOBP%GO:0071216		28	-0.343748	-1.28873	0.16	0.459355	1	1009	tags=50%, list=32%, signal=73%
PROTEIN PROCESSING%GOBP%GO:0016485	PROTEIN PROCESSING%GOBP%GO:0016485		27	-0.347422	-1.28821	0.168113	0.459735	1	524	tags=37%, list=17%, signal=44%
DIGESTIVE TRACT DEVELOPMENT%GOBP%GO:0048565	DIGESTIVE TRACT DEVELOPMENT%GOBP%GO:0048565		19	-0.380469	-1.28742	0.177258	0.460757	1	942	tags=53%, list=30%, signal=75%
RESPONSE TO INORGANIC SUBSTANCE%GOBP%GO:0010035	RESPONSE TO INORGANIC SUBSTANCE%GOBP%GO:0010035		55	-0.304817	-1.28684	0.148454	0.461324	1	811	tags=38%, list=26%, signal=51%
TRANSFORMING GROWTH FACTOR BETA RECEPTOR SIGNALING PATHWAY%GOBP%GO:0007179	TRANSFORMING GROWTH FACTOR BETA RECEPTOR SIGNALING PATHWAY%GOBP%GO:0007179		20	-0.374482	-1.28626	0.169875	0.461873	1	1469	tags=70%, list=47%, signal=132%
OSSIFICATION%GOBP%GO:0001503	OSSIFICATION%GOBP%GO:0001503		29	-0.352225	-1.28575	0.153173	0.462231	1	273	tags=24%, list=9%, signal=26%
ANTIGEN PROCESSING AND PRESENTATION OF EXOGENOUS PEPTIDE ANTIGEN%GOBP%GO:0002478	ANTIGEN PROCESSING AND PRESENTATION OF EXOGENOUS PEPTIDE ANTIGEN%GOBP%GO:0002478		28	-0.345841	-1.28465	0.171674	0.464304	1	935	tags=43%, list=30%, signal=61%
CARDIAC CHAMBER MORPHOGENESIS%GOBP%GO:0003206	CARDIAC CHAMBER MORPHOGENESIS%GOBP%GO:0003206		27	-0.354355	-1.28426	0.175705	0.464332	1	1447	tags=63%, list=46%, signal=117%
POSITIVE REGULATION OF NEURON DIFFERENTIATION%GOBP%GO:0045666	POSITIVE REGULATION OF NEURON DIFFERENTIATION%GOBP%GO:0045666		49	-0.309163	-1.28174	0.156442	0.470121	1	1238	tags=51%, list=40%, signal=83%
NEGATIVE REGULATION OF CELLULAR RESPONSE TO GROWTH FACTOR STIMULUS%GOBP%GO:0090288	NEGATIVE REGULATION OF CELLULAR RESPONSE TO GROWTH FACTOR STIMULUS%GOBP%GO:0090288		27	-0.348155	-1.28088	0.153433	0.471528	1	1707	tags=78%, list=55%, signal=170%
NEGATIVE REGULATION OF LYMPHOCYTE ACTIVATION%GOBP%GO:0051250	NEGATIVE REGULATION OF LYMPHOCYTE ACTIVATION%GOBP%GO:0051250		20	-0.371289	-1.28066	0.1614	0.471163	1	710	tags=40%, list=23%, signal=51%
REGULATION OF VESICLE-MEDIATED TRANSPORT%GOBP%GO:0060627	REGULATION OF VESICLE-MEDIATED TRANSPORT%GOBP%GO:0060627		87	-0.286829	-1.27932	0.103448	0.473896	1	1328	tags=54%, list=43%, signal=91%
SIGNAL RELEASE FROM SYNAPSE%GOBP%GO:0099643	SIGNAL RELEASE FROM SYNAPSE%GOBP%GO:0099643		17	-0.386746	-1.27903	0.184633	0.47365	1	1017	tags=53%, list=33%, signal=78%
REGULATION OF ADAPTIVE IMMUNE RESPONSE BASED ON SOMATIC RECOMBINATION OF IMMUNE RECEPTORS BUILT FROM IMMUNOGLOBULIN SUPERFAMILY DOMAINS%GOBP%GO:0002822	REGULATION OF ADAPTIVE IMMUNE RESPONSE BASED ON SOMATIC RECOMBINATION OF IMMUNE RECEPTORS BUILT FROM IMMUNOGLOBULIN SUPERFAMILY DOMAINS%GOBP%GO:0002822		22	-0.36212	-1.27687	0.198238	0.478484	1	957	tags=50%, list=31%, signal=72%
REGULATION OF MUSCLE ADAPTATION%GOBP%GO:0043502	REGULATION OF MUSCLE ADAPTATION%GOBP%GO:0043502		16	-0.393369	-1.27667	0.185912	0.477977	1	859	tags=38%, list=28%, signal=52%
ORGAN GROWTH%GOBP%GO:0035265	ORGAN GROWTH%GOBP%GO:0035265		20	-0.372924	-1.27537	0.194761	0.480496	1	1520	tags=75%, list=49%, signal=145%
LEUKOCYTE DIFFERENTIATION%GOBP%GO:0002521	LEUKOCYTE DIFFERENTIATION%GOBP%GO:0002521		61	-0.293963	-1.2753	0.134283	0.479674	1	1744	tags=74%, list=56%, signal=164%
NEUROTRANSMITTER SECRETION%GOBP%GO:0007269	NEUROTRANSMITTER SECRETION%GOBP%GO:0007269		17	-0.386746	-1.27433	0.165914	0.481344	1	1017	tags=53%, list=33%, signal=78%
POSITIVE REGULATION OF ION TRANSMEMBRANE TRANSPORTER ACTIVITY%GOBP%GO:0032414	POSITIVE REGULATION OF ION TRANSMEMBRANE TRANSPORTER ACTIVITY%GOBP%GO:0032414		27	-0.351224	-1.2731	0.170732	0.483679	1	1214	tags=52%, list=39%, signal=84%
PEPTIDYL-TYROSINE MODIFICATION%GOBP%GO:0018212	PEPTIDYL-TYROSINE MODIFICATION%GOBP%GO:0018212		26	-0.348141	-1.27189	0.167213	0.486041	1	1511	tags=69%, list=48%, signal=133%
REGULATION OF INTERFERON-GAMMA PRODUCTION%GOBP%GO:0032649	REGULATION OF INTERFERON-GAMMA PRODUCTION%GOBP%GO:0032649		18	-0.38309	-1.27186	0.180791	0.485113	1	1009	tags=50%, list=32%, signal=74%
IMMUNE RESPONSE%GOBP%GO:0006955	IMMUNE RESPONSE%GOBP%GO:0006955		298	-0.259173	-1.27141	0.037	0.485358	1	977	tags=39%, list=31%, signal=51%
ADAPTIVE IMMUNE SYSTEM%REACTOME DATABASE ID RELEASE 72%1280218	ADAPTIVE IMMUNE SYSTEM%REACTOME DATABASE ID RELEASE 72%1280218		120	-0.275808	-1.26931	0.0830831	0.490318	1	1019	tags=41%, list=33%, signal=58%
HEMATOPOIETIC OR LYMPHOID ORGAN DEVELOPMENT%GOBP%GO:0048534	HEMATOPOIETIC OR LYMPHOID ORGAN DEVELOPMENT%GOBP%GO:0048534		97	-0.278824	-1.26835	0.114919	0.491998	1	1612	tags=65%, list=52%, signal=130%
PID_SHP2_PATHWAY%MSIGDB_C2%PID_SHP2_PATHWAY	PID_SHP2_PATHWAY%MSIGDB_C2%PID_SHP2_PATHWAY		18	-0.377519	-1.26764	0.191919	0.492918	1	1600	tags=78%, list=51%, signal=159%
POSITIVE REGULATION OF HYDROLASE ACTIVITY%GOBP%GO:0051345	POSITIVE REGULATION OF HYDROLASE ACTIVITY%GOBP%GO:0051345		98	-0.284151	-1.26755	0.0966767	0.492175	1	823	tags=33%, list=26%, signal=43%
POSITIVE REGULATION OF DEVELOPMENTAL PROCESS%GOBP%GO:0051094	POSITIVE REGULATION OF DEVELOPMENTAL PROCESS%GOBP%GO:0051094		256	-0.259187	-1.26659	0.054	0.493872	1	1278	tags=47%, list=41%, signal=74%
POSITIVE REGULATION OF MULTICELLULAR ORGANISMAL PROCESS%GOBP%GO:0051240	POSITIVE REGULATION OF MULTICELLULAR ORGANISMAL PROCESS%GOBP%GO:0051240		322	-0.25897	-1.26583	0.024	0.494969	1	1278	tags=48%, list=41%, signal=72%
INNATE IMMUNE RESPONSE%GOBP%GO:0045087	INNATE IMMUNE RESPONSE%GOBP%GO:0045087		84	-0.285062	-1.26521	0.110775	0.49562	1	965	tags=40%, list=31%, signal=57%
PID_PDGFRB_PATHWAY%MSIGDB_C2%PID_PDGFRB_PATHWAY	PID_PDGFRB_PATHWAY%MSIGDB_C2%PID_PDGFRB_PATHWAY		21	-0.362189	-1.26494	0.176536	0.495349	1	743	tags=38%, list=24%, signal=50%
REGULATION OF SYNAPTIC PLASTICITY%GOBP%GO:0048167	REGULATION OF SYNAPTIC PLASTICITY%GOBP%GO:0048167		23	-0.357313	-1.26323	0.18018	0.499024	1	1331	tags=61%, list=43%, signal=105%
WNT%IOB%WNT	WNT%IOB%WNT		30	-0.334201	-1.25978	0.191286	0.507888	1	326	tags=23%, list=10%, signal=26%
BEHAVIOR%GOBP%GO:0007610	BEHAVIOR%GOBP%GO:0007610		57	-0.300214	-1.25908	0.14898	0.508781	1	715	tags=33%, list=23%, signal=42%
COGNITION%GOBP%GO:0050890	COGNITION%GOBP%GO:0050890		44	-0.310686	-1.25902	0.15942	0.507928	1	715	tags=34%, list=23%, signal=44%
REGULATION OF POTASSIUM ION TRANSMEMBRANE TRANSPORT%GOBP%GO:1901379	REGULATION OF POTASSIUM ION TRANSMEMBRANE TRANSPORT%GOBP%GO:1901379		17	-0.385287	-1.25799	0.173709	0.509775	1	1141	tags=59%, list=37%, signal=92%
PID_FCER1_PATHWAY%MSIGDB_C2%PID_FCER1_PATHWAY	PID_FCER1_PATHWAY%MSIGDB_C2%PID_FCER1_PATHWAY		17	-0.383777	-1.25782	0.19467	0.509202	1	1472	tags=71%, list=47%, signal=133%
G ALPHA (Q) SIGNALLING EVENTS%REACTOME DATABASE ID RELEASE 72%416476	G ALPHA (Q) SIGNALLING EVENTS%REACTOME DATABASE ID RELEASE 72%416476		56	-0.297858	-1.25746	0.167008	0.509145	1	1261	tags=54%, list=40%, signal=88%
REGULATION OF SUPRAMOLECULAR FIBER ORGANIZATION%GOBP%GO:1902903	REGULATION OF SUPRAMOLECULAR FIBER ORGANIZATION%GOBP%GO:1902903		63	-0.29191	-1.25491	0.161026	0.515325	1	818	tags=33%, list=26%, signal=44%
POSITIVE REGULATION OF TRANSPORTER ACTIVITY%GOBP%GO:0032411	POSITIVE REGULATION OF TRANSPORTER ACTIVITY%GOBP%GO:0032411		28	-0.33862	-1.25473	0.187638	0.514809	1	171	tags=18%, list=5%, signal=19%
REGULATION OF CYTOKINE PRODUCTION%GOBP%GO:0001817	REGULATION OF CYTOKINE PRODUCTION%GOBP%GO:0001817		120	-0.274592	-1.25428	0.113797	0.515064	1	1426	tags=54%, list=46%, signal=96%
POSITIVE REGULATION OF PROTEIN COMPLEX ASSEMBLY%GOBP%GO:0031334	POSITIVE REGULATION OF PROTEIN COMPLEX ASSEMBLY%GOBP%GO:0031334		38	-0.319874	-1.25412	0.179894	0.514482	1	818	tags=37%, list=26%, signal=49%
CELLULAR COMPONENT DISASSEMBLY%GOBP%GO:0022411	CELLULAR COMPONENT DISASSEMBLY%GOBP%GO:0022411		60	-0.296695	-1.25169	0.156057	0.520169	1	340	tags=20%, list=11%, signal=22%
REGULATION OF LEUKOCYTE MIGRATION%GOBP%GO:0002685	REGULATION OF LEUKOCYTE MIGRATION%GOBP%GO:0002685		45	-0.309626	-1.25047	0.175983	0.522667	1	1265	tags=56%, list=41%, signal=92%
ANTIMICROBIAL HUMORAL RESPONSE%GOBP%GO:0019730	ANTIMICROBIAL HUMORAL RESPONSE%GOBP%GO:0019730		30	-0.332827	-1.2499	0.19334	0.523244	1	849	tags=53%, list=27%, signal=73%
TRANSCRIPTIONAL REGULATION BY RUNX1%REACTOME%R-HSA-8878171.3	TRANSCRIPTIONAL REGULATION BY RUNX1%REACTOME%R-HSA-8878171.3		19	-0.372097	-1.24905	0.201405	0.524677	1	422	tags=32%, list=14%, signal=36%
DISEASES ASSOCIATED WITH GLYCOSAMINOGLYCAN METABOLISM%REACTOME DATABASE ID RELEASE 72%3560782	DISEASES ASSOCIATED WITH GLYCOSAMINOGLYCAN METABOLISM%REACTOME DATABASE ID RELEASE 72%3560782		18	-0.37593	-1.24807	0.185012	0.526456	1	159	tags=22%, list=5%, signal=23%
PROTEIN MATURATION%GOBP%GO:0051604	PROTEIN MATURATION%GOBP%GO:0051604		29	-0.329214	-1.24767	0.197383	0.526598	1	524	tags=34%, list=17%, signal=41%
IMPORT ACROSS PLASMA MEMBRANE%GOBP%GO:0098739	IMPORT ACROSS PLASMA MEMBRANE%GOBP%GO:0098739		23	-0.356635	-1.24748	0.188275	0.526126	1	798	tags=39%, list=26%, signal=52%
PHOSPHODIESTERASES IN NEURONAL FUNCTION%WIKIPATHWAYS_20200510%WP4222%HOMO SAPIENS	PHOSPHODIESTERASES IN NEURONAL FUNCTION%WIKIPATHWAYS_20200510%WP4222%HOMO SAPIENS		17	-0.3808	-1.24741	0.216121	0.525295	1	1638	tags=82%, list=53%, signal=173%
CALCIUM REGULATION IN THE CARDIAC CELL%WIKIPATHWAYS_20200510%WP536%HOMO SAPIENS	CALCIUM REGULATION IN THE CARDIAC CELL%WIKIPATHWAYS_20200510%WP536%HOMO SAPIENS		56	-0.296346	-1.24725	0.171955	0.524683	1	1236	tags=54%, list=40%, signal=87%
ANTIGEN PROCESSING AND PRESENTATION OF EXOGENOUS PEPTIDE ANTIGEN VIA MHC CLASS II%GOBP%GO:0019886	ANTIGEN PROCESSING AND PRESENTATION OF EXOGENOUS PEPTIDE ANTIGEN VIA MHC CLASS II%GOBP%GO:0019886		20	-0.360864	-1.24712	0.200684	0.524055	1	586	tags=35%, list=19%, signal=43%
FATTY ACID DERIVATIVE METABOLIC PROCESS%GOBP%GO:1901568	FATTY ACID DERIVATIVE METABOLIC PROCESS%GOBP%GO:1901568		28	-0.33851	-1.24647	0.186296	0.524925	1	223	tags=21%, list=7%, signal=23%
POSITIVE REGULATION OF BLOOD CIRCULATION%GOBP%GO:1903524	POSITIVE REGULATION OF BLOOD CIRCULATION%GOBP%GO:1903524		18	-0.367505	-1.24636	0.202718	0.524225	1	302	tags=33%, list=10%, signal=37%
T CELL DIFFERENTIATION%GOBP%GO:0030217	T CELL DIFFERENTIATION%GOBP%GO:0030217		25	-0.34276	-1.24521	0.201533	0.526561	1	1744	tags=80%, list=56%, signal=180%
REGULATION OF ACTIN FILAMENT-BASED MOVEMENT%GOBP%GO:1903115	REGULATION OF ACTIN FILAMENT-BASED MOVEMENT%GOBP%GO:1903115		17	-0.380773	-1.24478	0.193046	0.526765	1	184	tags=24%, list=6%, signal=25%
UNSATURATED FATTY ACID METABOLIC PROCESS%GOBP%GO:0033559	UNSATURATED FATTY ACID METABOLIC PROCESS%GOBP%GO:0033559		16	-0.386944	-1.24274	0.192575	0.531641	1	221	tags=25%, list=7%, signal=27%
CELL-CELL JUNCTION ASSEMBLY%GOBP%GO:0007043	CELL-CELL JUNCTION ASSEMBLY%GOBP%GO:0007043		27	-0.343486	-1.24248	0.192641	0.531368	1	617	tags=37%, list=20%, signal=46%
REGULATION OF CELLULAR RESPONSE TO GROWTH FACTOR STIMULUS%GOBP%GO:0090287	REGULATION OF CELLULAR RESPONSE TO GROWTH FACTOR STIMULUS%GOBP%GO:0090287		55	-0.296122	-1.24145	0.1853	0.533246	1	1662	tags=69%, list=53%, signal=145%
EBOLA VIRUS PATHWAY ON HOST%WIKIPATHWAYS_20200510%WP4217%HOMO SAPIENS	EBOLA VIRUS PATHWAY ON HOST%WIKIPATHWAYS_20200510%WP4217%HOMO SAPIENS		31	-0.331758	-1.24144	0.185265	0.532231	1	1157	tags=48%, list=37%, signal=76%
SIGNALING BY PDGF%REACTOME%R-HSA-186797.4	SIGNALING BY PDGF%REACTOME%R-HSA-186797.4		17	-0.373684	-1.24135	0.231207	0.531459	1	1481	tags=71%, list=48%, signal=134%
REGULATION OF ACTIN CYTOSKELETON%WIKIPATHWAYS_20200510%WP51%HOMO SAPIENS	REGULATION OF ACTIN CYTOSKELETON%WIKIPATHWAYS_20200510%WP51%HOMO SAPIENS		28	-0.336161	-1.24034	0.205016	0.533292	1	446	tags=25%, list=14%, signal=29%
FC-EPSILON RECEPTOR I SIGNALING IN MAST CELLS%PATHWAY INTERACTION DATABASE NCI-NATURE CURATED DATA%FC-EPSILON RECEPTOR I SIGNALING IN MAST CELLS	FC-EPSILON RECEPTOR I SIGNALING IN MAST CELLS%PATHWAY INTERACTION DATABASE NCI-NATURE CURATED DATA%FC-EPSILON RECEPTOR I SIGNALING IN MAST CELLS		17	-0.383777	-1.23754	0.215029	0.540466	1	1472	tags=71%, list=47%, signal=133%
ACTIN CYTOSKELETON REORGANIZATION%GOBP%GO:0031532	ACTIN CYTOSKELETON REORGANIZATION%GOBP%GO:0031532		17	-0.375003	-1.23639	0.233526	0.542937	1	558	tags=35%, list=18%, signal=43%
REGULATION OF CELL DIFFERENTIATION%GOBP%GO:0045595	REGULATION OF CELL DIFFERENTIATION%GOBP%GO:0045595		305	-0.253373	-1.23632	0.037	0.542076	1	1288	tags=47%, list=41%, signal=72%
PEPTIDYL-TYROSINE PHOSPHORYLATION%GOBP%GO:0018108	PEPTIDYL-TYROSINE PHOSPHORYLATION%GOBP%GO:0018108		26	-0.348141	-1.23632	0.20943	0.541045	1	1511	tags=69%, list=48%, signal=133%
IL4-MEDIATED SIGNALING EVENTS%PATHWAY INTERACTION DATABASE NCI-NATURE CURATED DATA%IL4-MEDIATED SIGNALING EVENTS	IL4-MEDIATED SIGNALING EVENTS%PATHWAY INTERACTION DATABASE NCI-NATURE CURATED DATA%IL4-MEDIATED SIGNALING EVENTS		16	-0.382464	-1.23548	0.212515	0.542437	1	784	tags=44%, list=25%, signal=58%
IMMUNE SYSTEM DEVELOPMENT%GOBP%GO:0002520	IMMUNE SYSTEM DEVELOPMENT%GOBP%GO:0002520		101	-0.27282	-1.23547	0.131658	0.541432	1	1612	tags=64%, list=52%, signal=129%
CELLULAR RESPONSE TO OXYGEN LEVELS%GOBP%GO:0071453	CELLULAR RESPONSE TO OXYGEN LEVELS%GOBP%GO:0071453		15	-0.389921	-1.23498	0.224442	0.541821	1	526	tags=33%, list=17%, signal=40%
RESPONSE TO ALCOHOL%GOBP%GO:0097305	RESPONSE TO ALCOHOL%GOBP%GO:0097305		21	-0.359081	-1.23394	0.206818	0.543823	1	917	tags=48%, list=29%, signal=67%
LYMPHOCYTE DIFFERENTIATION%GOBP%GO:0030098	LYMPHOCYTE DIFFERENTIATION%GOBP%GO:0030098		43	-0.303528	-1.23327	0.202899	0.544794	1	1744	tags=77%, list=56%, signal=172%
REGULATION OF CELLULAR CARBOHYDRATE METABOLIC PROCESS%GOBP%GO:0010675	REGULATION OF CELLULAR CARBOHYDRATE METABOLIC PROCESS%GOBP%GO:0010675		15	-0.38415	-1.23325	0.212791	0.543836	1	1406	tags=67%, list=45%, signal=121%
POSITIVE REGULATION OF PHOSPHOLIPASE ACTIVITY%GOBP%GO:0010518	POSITIVE REGULATION OF PHOSPHOLIPASE ACTIVITY%GOBP%GO:0010518		23	-0.348519	-1.23324	0.211687	0.542827	1	1677	tags=78%, list=54%, signal=168%
ANIMAL ORGAN MORPHOGENESIS%GOBP%GO:0009887	ANIMAL ORGAN MORPHOGENESIS%GOBP%GO:0009887		154	-0.262603	-1.23272	0.121	0.543313	1	1501	tags=56%, list=48%, signal=102%
WNT%NETPATH%WNT	WNT%NETPATH%WNT		31	-0.326696	-1.23254	0.184322	0.542795	1	326	tags=23%, list=10%, signal=25%
HEMATOPOIETIC STEM CELL DIFFERENTIATION%WIKIPATHWAYS_20200510%WP2849%HOMO SAPIENS	HEMATOPOIETIC STEM CELL DIFFERENTIATION%WIKIPATHWAYS_20200510%WP2849%HOMO SAPIENS		17	-0.380819	-1.23186	0.208766	0.543724	1	1472	tags=76%, list=47%, signal=144%
POSITIVE REGULATION OF ERK1 AND ERK2 CASCADE%GOBP%GO:0070374	POSITIVE REGULATION OF ERK1 AND ERK2 CASCADE%GOBP%GO:0070374		56	-0.293605	-1.23093	0.189796	0.545253	1	991	tags=46%, list=32%, signal=67%
VESICLE-MEDIATED TRANSPORT%GOBP%GO:0016192	VESICLE-MEDIATED TRANSPORT%GOBP%GO:0016192		314	-0.251944	-1.22886	0.057	0.549996	1	1130	tags=40%, list=36%, signal=57%
ANTIGEN PROCESSING AND PRESENTATION OF PEPTIDE OR POLYSACCHARIDE ANTIGEN VIA MHC CLASS II%GOBP%GO:0002504	ANTIGEN PROCESSING AND PRESENTATION OF PEPTIDE OR POLYSACCHARIDE ANTIGEN VIA MHC CLASS II%GOBP%GO:0002504		20	-0.360864	-1.22721	0.228111	0.553757	1	586	tags=35%, list=19%, signal=43%
SENSORY PERCEPTION OF MECHANICAL STIMULUS%GOBP%GO:0050954	SENSORY PERCEPTION OF MECHANICAL STIMULUS%GOBP%GO:0050954		15	-0.3834	-1.22719	0.224057	0.552767	1	629	tags=40%, list=20%, signal=50%
CENTRAL NERVOUS SYSTEM NEURON DIFFERENTIATION%GOBP%GO:0021953	CENTRAL NERVOUS SYSTEM NEURON DIFFERENTIATION%GOBP%GO:0021953		16	-0.376022	-1.22719	0.218097	0.551746	1	1662	tags=81%, list=53%, signal=173%
TCR SIGNALING IN NAIVE CD8+ T CELLS%PATHWAY INTERACTION DATABASE NCI-NATURE CURATED DATA%TCR SIGNALING IN NAIVE CD8+ T CELLS	TCR SIGNALING IN NAIVE CD8+ T CELLS%PATHWAY INTERACTION DATABASE NCI-NATURE CURATED DATA%TCR SIGNALING IN NAIVE CD8+ T CELLS		18	-0.365176	-1.22564	0.231031	0.555275	1	970	tags=50%, list=31%, signal=72%
POSITIVE REGULATION OF DEVELOPMENTAL GROWTH%GOBP%GO:0048639	POSITIVE REGULATION OF DEVELOPMENTAL GROWTH%GOBP%GO:0048639		17	-0.375765	-1.22485	0.225173	0.55659	1	1643	tags=76%, list=53%, signal=161%
POSITIVE REGULATION OF CELL DEVELOPMENT%GOBP%GO:0010720	POSITIVE REGULATION OF CELL DEVELOPMENT%GOBP%GO:0010720		80	-0.275345	-1.22415	0.149239	0.557579	1	1269	tags=49%, list=41%, signal=80%
POSITIVE REGULATION OF LIPASE ACTIVITY%GOBP%GO:0060193	POSITIVE REGULATION OF LIPASE ACTIVITY%GOBP%GO:0060193		25	-0.34302	-1.22307	0.213974	0.55973	1	1677	tags=76%, list=54%, signal=163%
BIOCARTA_NFAT_PATHWAY%MSIGDB_C2%BIOCARTA_NFAT_PATHWAY	BIOCARTA_NFAT_PATHWAY%MSIGDB_C2%BIOCARTA_NFAT_PATHWAY		16	-0.381862	-1.22234	0.225581	0.560783	1	1629	tags=75%, list=52%, signal=156%
ANTIGEN PROCESSING AND PRESENTATION OF PEPTIDE ANTIGEN VIA MHC CLASS II%GOBP%GO:0002495	ANTIGEN PROCESSING AND PRESENTATION OF PEPTIDE ANTIGEN VIA MHC CLASS II%GOBP%GO:0002495		20	-0.360864	-1.22128	0.224581	0.562861	1	586	tags=35%, list=19%, signal=43%
PID_CD8_TCR_PATHWAY%MSIGDB_C2%PID_CD8_TCR_PATHWAY	PID_CD8_TCR_PATHWAY%MSIGDB_C2%PID_CD8_TCR_PATHWAY		18	-0.365176	-1.22096	0.216992	0.562795	1	970	tags=50%, list=31%, signal=72%
VESICLE-MEDIATED TRANSPORT IN SYNAPSE%GOBP%GO:0099003	VESICLE-MEDIATED TRANSPORT IN SYNAPSE%GOBP%GO:0099003		17	-0.36986	-1.22051	0.225694	0.56307	1	1614	tags=76%, list=52%, signal=158%
HEPARAN SULFATE HEPARIN (HS-GAG) METABOLISM%REACTOME DATABASE ID RELEASE 72%1638091	HEPARAN SULFATE HEPARIN (HS-GAG) METABOLISM%REACTOME DATABASE ID RELEASE 72%1638091		17	-0.36793	-1.21985	0.216686	0.56394	1	403	tags=29%, list=13%, signal=34%
REGULATION OF SIGNALING RECEPTOR ACTIVITY%GOBP%GO:0010469	REGULATION OF SIGNALING RECEPTOR ACTIVITY%GOBP%GO:0010469		31	-0.317235	-1.21964	0.218916	0.563521	1	669	tags=39%, list=21%, signal=49%
ANATOMICAL STRUCTURE MORPHOGENESIS%GOBP%GO:0009653	ANATOMICAL STRUCTURE MORPHOGENESIS%GOBP%GO:0009653		390	-0.24715	-1.21901	0.052	0.5644	1	1331	tags=47%, list=43%, signal=72%
REGULATION OF PEPTIDE SECRETION%GOBP%GO:0002791	REGULATION OF PEPTIDE SECRETION%GOBP%GO:0002791		80	-0.273797	-1.2188	0.187058	0.563982	1	1042	tags=45%, list=33%, signal=66%
SIGNAL TRANSDUCTION BY PROTEIN PHOSPHORYLATION%GOBP%GO:0023014	SIGNAL TRANSDUCTION BY PROTEIN PHOSPHORYLATION%GOBP%GO:0023014		56	-0.28934	-1.21816	0.189549	0.5649	1	650	tags=32%, list=21%, signal=40%
HEMOPOIESIS%GOBP%GO:0030097	HEMOPOIESIS%GOBP%GO:0030097		91	-0.273464	-1.21728	0.171371	0.566368	1	1612	tags=64%, list=52%, signal=128%
HETEROTRIMERIC G-PROTEIN SIGNALING PATHWAY-GQ ALPHA AND GO ALPHA MEDIATED PATHWAY%PANTHER PATHWAY%P00027	HETEROTRIMERIC G-PROTEIN SIGNALING PATHWAY-GQ ALPHA AND GO ALPHA MEDIATED PATHWAY%PANTHER PATHWAY%P00027		37	-0.310136	-1.21634	0.216418	0.568104	1	1434	tags=59%, list=46%, signal=109%
AXON DEVELOPMENT%GOBP%GO:0061564	AXON DEVELOPMENT%GOBP%GO:0061564		77	-0.27453	-1.21623	0.166497	0.567372	1	1607	tags=61%, list=52%, signal=123%
TRANSMEMBRANE RECEPTOR PROTEIN SERINE/THREONINE KINASE SIGNALING PATHWAY%GOBP%GO:0007178	TRANSMEMBRANE RECEPTOR PROTEIN SERINE/THREONINE KINASE SIGNALING PATHWAY%GOBP%GO:0007178		31	-0.321064	-1.21569	0.217578	0.568014	1	1469	tags=61%, list=47%, signal=115%
CELL MORPHOGENESIS%GOBP%GO:0000902	CELL MORPHOGENESIS%GOBP%GO:0000902		136	-0.261448	-1.21549	0.145291	0.567564	1	1383	tags=51%, list=44%, signal=88%
FEMALE PREGNANCY%GOBP%GO:0007565	FEMALE PREGNANCY%GOBP%GO:0007565		15	-0.389013	-1.21487	0.229142	0.568375	1	712	tags=40%, list=23%, signal=52%
NEURON PROJECTION GUIDANCE%GOBP%GO:0097485	NEURON PROJECTION GUIDANCE%GOBP%GO:0097485		54	-0.288367	-1.21461	0.204969	0.568126	1	611	tags=30%, list=20%, signal=36%
AXON GUIDANCE%GOBP%GO:0007411	AXON GUIDANCE%GOBP%GO:0007411		54	-0.288367	-1.21423	0.220041	0.568195	1	611	tags=30%, list=20%, signal=36%
PROTEIN STABILIZATION%GOBP%GO:0050821	PROTEIN STABILIZATION%GOBP%GO:0050821		21	-0.352867	-1.21319	0.221978	0.570266	1	1440	tags=62%, list=46%, signal=114%
POSITIVE REGULATION OF RECEPTOR-MEDIATED ENDOCYTOSIS%GOBP%GO:0048260	POSITIVE REGULATION OF RECEPTOR-MEDIATED ENDOCYTOSIS%GOBP%GO:0048260		15	-0.379656	-1.21299	0.224824	0.569864	1	275	tags=27%, list=9%, signal=29%
POSITIVE REGULATION OF GTPASE ACTIVITY%GOBP%GO:0043547	POSITIVE REGULATION OF GTPASE ACTIVITY%GOBP%GO:0043547		37	-0.314783	-1.21235	0.217112	0.570669	1	983	tags=38%, list=32%, signal=55%
POSITIVE REGULATION OF LIPID LOCALIZATION%GOBP%GO:1905954	POSITIVE REGULATION OF LIPID LOCALIZATION%GOBP%GO:1905954		18	-0.362391	-1.21231	0.229698	0.569755	1	346	tags=28%, list=11%, signal=31%
NEGATIVE REGULATION OF CELL ACTIVATION%GOBP%GO:0050866	NEGATIVE REGULATION OF CELL ACTIVATION%GOBP%GO:0050866		37	-0.307543	-1.21222	0.228512	0.569015	1	1672	tags=68%, list=54%, signal=144%
REGULATION OF ANATOMICAL STRUCTURE SIZE%GOBP%GO:0090066	REGULATION OF ANATOMICAL STRUCTURE SIZE%GOBP%GO:0090066		74	-0.278145	-1.21213	0.178138	0.568262	1	1298	tags=51%, list=42%, signal=86%
RESPONSE TO BACTERIUM%GOBP%GO:0009617	RESPONSE TO BACTERIUM%GOBP%GO:0009617		77	-0.275416	-1.21191	0.177125	0.567917	1	1031	tags=48%, list=33%, signal=70%
PID_CD8_TCR_DOWNSTREAM_PATHWAY%MSIGDB_C2%PID_CD8_TCR_DOWNSTREAM_PATHWAY	PID_CD8_TCR_DOWNSTREAM_PATHWAY%MSIGDB_C2%PID_CD8_TCR_DOWNSTREAM_PATHWAY		15	-0.37805	-1.21185	0.248521	0.567083	1	1744	tags=87%, list=56%, signal=196%
REGULATION OF EXOCYTOSIS%GOBP%GO:0017157	REGULATION OF EXOCYTOSIS%GOBP%GO:0017157		35	-0.311892	-1.2118	0.227468	0.566232	1	1035	tags=51%, list=33%, signal=76%
ACTIVATION OF MAPK ACTIVITY%GOBP%GO:0000187	ACTIVATION OF MAPK ACTIVITY%GOBP%GO:0000187		26	-0.330754	-1.21173	0.235038	0.565455	1	318	tags=23%, list=10%, signal=25%
MULTI-MULTICELLULAR ORGANISM PROCESS%GOBP%GO:0044706	MULTI-MULTICELLULAR ORGANISM PROCESS%GOBP%GO:0044706		17	-0.366952	-1.21171	0.238636	0.5645	1	783	tags=41%, list=25%, signal=55%
REGULATION OF NEUROLOGICAL SYSTEM PROCESS%GOBP%GO:0031644	REGULATION OF NEUROLOGICAL SYSTEM PROCESS%GOBP%GO:0031644		22	-0.350753	-1.21168	0.236726	0.563613	1	754	tags=45%, list=24%, signal=60%
IMMUNE SYSTEM PROCESS%GOBP%GO:0002376	IMMUNE SYSTEM PROCESS%GOBP%GO:0002376		463	-0.242866	-1.21159	0.05	0.562886	1	977	tags=37%, list=31%, signal=46%
DEPHOSPHORYLATION%GOBP%GO:0016311	DEPHOSPHORYLATION%GOBP%GO:0016311		20	-0.357817	-1.21058	0.23015	0.564788	1	799	tags=40%, list=26%, signal=53%
REGULATION OF PROTEIN POLYMERIZATION%GOBP%GO:0032271	REGULATION OF PROTEIN POLYMERIZATION%GOBP%GO:0032271		30	-0.325355	-1.21044	0.23301	0.564199	1	886	tags=40%, list=28%, signal=55%
NEGATIVE REGULATION OF TRANSMEMBRANE RECEPTOR PROTEIN SERINE/THREONINE KINASE SIGNALING PATHWAY%GOBP%GO:0090101	NEGATIVE REGULATION OF TRANSMEMBRANE RECEPTOR PROTEIN SERINE/THREONINE KINASE SIGNALING PATHWAY%GOBP%GO:0090101		24	-0.335496	-1.20991	0.236583	0.564759	1	1599	tags=71%, list=51%, signal=144%
POSITIVE REGULATION OF PEPTIDE SECRETION%GOBP%GO:0002793	POSITIVE REGULATION OF PEPTIDE SECRETION%GOBP%GO:0002793		44	-0.293761	-1.20786	0.208551	0.569592	1	1308	tags=59%, list=42%, signal=100%
ANATOMICAL STRUCTURE FORMATION INVOLVED IN MORPHOGENESIS%GOBP%GO:0048646	ANATOMICAL STRUCTURE FORMATION INVOLVED IN MORPHOGENESIS%GOBP%GO:0048646		146	-0.257958	-1.20609	0.140281	0.573614	1	1553	tags=58%, list=50%, signal=111%
UNTITLED%PANTHER PATHWAY%P00019	UNTITLED%PANTHER PATHWAY%P00019		19	-0.366043	-1.20323	0.232532	0.581085	1	1984	tags=100%, list=64%, signal=273%
POSITIVE REGULATION OF CELL ADHESION%GOBP%GO:0045785	POSITIVE REGULATION OF CELL ADHESION%GOBP%GO:0045785		87	-0.271804	-1.203	0.180808	0.580802	1	998	tags=39%, list=32%, signal=56%
POSITIVE REGULATION OF NERVOUS SYSTEM DEVELOPMENT%GOBP%GO:0051962	POSITIVE REGULATION OF NERVOUS SYSTEM DEVELOPMENT%GOBP%GO:0051962		71	-0.278622	-1.2012	0.194106	0.585121	1	1238	tags=48%, list=40%, signal=78%
DEVELOPMENTAL GROWTH%GOBP%GO:0048589	DEVELOPMENTAL GROWTH%GOBP%GO:0048589		39	-0.301352	-1.20092	0.220682	0.584985	1	1086	tags=44%, list=35%, signal=66%
REGULATION OF ACTIN FILAMENT BUNDLE ASSEMBLY%GOBP%GO:0032231	REGULATION OF ACTIN FILAMENT BUNDLE ASSEMBLY%GOBP%GO:0032231		22	-0.343448	-1.2005	0.239514	0.585224	1	273	tags=23%, list=9%, signal=25%
MIRNA TARGETS IN ECM AND MEMBRANE RECEPTORS%WIKIPATHWAYS_20200510%WP2911%HOMO SAPIENS	MIRNA TARGETS IN ECM AND MEMBRANE RECEPTORS%WIKIPATHWAYS_20200510%WP2911%HOMO SAPIENS		15	-0.379854	-1.20042	0.263341	0.584459	1	1706	tags=87%, list=55%, signal=191%
REGULATION OF CHROMATIN ORGANIZATION%GOBP%GO:1902275	REGULATION OF CHROMATIN ORGANIZATION%GOBP%GO:1902275		15	-0.38316	-1.20002	0.221302	0.584647	1	389	tags=27%, list=12%, signal=30%
PID_IL12_2PATHWAY%MSIGDB_C2%PID_IL12_2PATHWAY	PID_IL12_2PATHWAY%MSIGDB_C2%PID_IL12_2PATHWAY		22	-0.344844	-1.19963	0.242729	0.584783	1	1380	tags=59%, list=44%, signal=105%
REGULATION OF PEPTIDE TRANSPORT%GOBP%GO:0090087	REGULATION OF PEPTIDE TRANSPORT%GOBP%GO:0090087		101	-0.264227	-1.19921	0.184739	0.585057	1	1042	tags=43%, list=33%, signal=62%
REGULATION OF PROTEIN SECRETION%GOBP%GO:0050708	REGULATION OF PROTEIN SECRETION%GOBP%GO:0050708		76	-0.273152	-1.19909	0.192929	0.58439	1	1042	tags=45%, list=33%, signal=66%
POSITIVE REGULATION OF PHOSPHATIDYLINOSITOL 3-KINASE SIGNALING%GOBP%GO:0014068	POSITIVE REGULATION OF PHOSPHATIDYLINOSITOL 3-KINASE SIGNALING%GOBP%GO:0014068		31	-0.318402	-1.19903	0.222698	0.583565	1	1530	tags=68%, list=49%, signal=132%
REGULATION OF LEUKOCYTE MEDIATED CYTOTOXICITY%GOBP%GO:0001910	REGULATION OF LEUKOCYTE MEDIATED CYTOTOXICITY%GOBP%GO:0001910		18	-0.356372	-1.19745	0.250283	0.587391	1	1035	tags=56%, list=33%, signal=83%
IL12-MEDIATED SIGNALING EVENTS%PATHWAY INTERACTION DATABASE NCI-NATURE CURATED DATA%IL12-MEDIATED SIGNALING EVENTS	IL12-MEDIATED SIGNALING EVENTS%PATHWAY INTERACTION DATABASE NCI-NATURE CURATED DATA%IL12-MEDIATED SIGNALING EVENTS		22	-0.344844	-1.19737	0.232044	0.586638	1	1380	tags=59%, list=44%, signal=105%
CELL-CELL COMMUNICATION%REACTOME%R-HSA-1500931.4	CELL-CELL COMMUNICATION%REACTOME%R-HSA-1500931.4		37	-0.308571	-1.19633	0.241053	0.588674	1	617	tags=30%, list=20%, signal=37%
DOWNSTREAM SIGNALING IN NAIVE CD8+ T CELLS%PATHWAY INTERACTION DATABASE NCI-NATURE CURATED DATA%DOWNSTREAM SIGNALING IN NAIVE CD8+ T CELLS	DOWNSTREAM SIGNALING IN NAIVE CD8+ T CELLS%PATHWAY INTERACTION DATABASE NCI-NATURE CURATED DATA%DOWNSTREAM SIGNALING IN NAIVE CD8+ T CELLS		15	-0.37805	-1.1957	0.254762	0.589541	1	1744	tags=87%, list=56%, signal=196%
B CELL ACTIVATION%GOBP%GO:0042113	B CELL ACTIVATION%GOBP%GO:0042113		29	-0.323279	-1.19527	0.264579	0.589862	1	1725	tags=79%, list=55%, signal=176%
CELLULAR RESPONSE TO GROWTH FACTOR STIMULUS%GOBP%GO:0071363	CELLULAR RESPONSE TO GROWTH FACTOR STIMULUS%GOBP%GO:0071363		78	-0.268848	-1.19265	0.19939	0.596786	1	1542	tags=59%, list=49%, signal=114%
MYELOID LEUKOCYTE DIFFERENTIATION%GOBP%GO:0002573	MYELOID LEUKOCYTE DIFFERENTIATION%GOBP%GO:0002573		21	-0.344281	-1.19262	0.261641	0.595878	1	1589	tags=71%, list=51%, signal=145%
HOMEOSTASIS OF NUMBER OF CELLS%GOBP%GO:0048872	HOMEOSTASIS OF NUMBER OF CELLS%GOBP%GO:0048872		18	-0.35506	-1.19241	0.248568	0.595547	1	1558	tags=72%, list=50%, signal=144%
G ALPHA (12 13) SIGNALLING EVENTS%REACTOME DATABASE ID RELEASE 72%416482	G ALPHA (12 13) SIGNALLING EVENTS%REACTOME DATABASE ID RELEASE 72%416482		22	-0.337921	-1.19218	0.249446	0.595294	1	1541	tags=68%, list=49%, signal=134%
POSITIVE REGULATION OF NEURON PROJECTION DEVELOPMENT%GOBP%GO:0010976	POSITIVE REGULATION OF NEURON PROJECTION DEVELOPMENT%GOBP%GO:0010976		40	-0.301063	-1.19205	0.231097	0.59474	1	1238	tags=50%, list=40%, signal=82%
SULFUR COMPOUND BIOSYNTHETIC PROCESS%GOBP%GO:0044272	SULFUR COMPOUND BIOSYNTHETIC PROCESS%GOBP%GO:0044272		35	-0.308754	-1.19097	0.233298	0.596891	1	221	tags=17%, list=7%, signal=18%
DEFENSE RESPONSE TO BACTERIUM%GOBP%GO:0042742	DEFENSE RESPONSE TO BACTERIUM%GOBP%GO:0042742		43	-0.292899	-1.1901	0.233264	0.598629	1	849	tags=47%, list=27%, signal=63%
POSITIVE REGULATION OF LEUKOCYTE DIFFERENTIATION%GOBP%GO:1902107	POSITIVE REGULATION OF LEUKOCYTE DIFFERENTIATION%GOBP%GO:1902107		27	-0.328571	-1.18794	0.243154	0.603999	1	998	tags=44%, list=32%, signal=65%
PLATELET ACTIVATION, SIGNALING AND AGGREGATION%REACTOME%R-HSA-76002.3	PLATELET ACTIVATION, SIGNALING AND AGGREGATION%REACTOME%R-HSA-76002.3		72	-0.273011	-1.18638	0.215805	0.607685	1	1287	tags=50%, list=41%, signal=83%
GROWTH%GOBP%GO:0040007	GROWTH%GOBP%GO:0040007		39	-0.301352	-1.18623	0.254488	0.607138	1	1086	tags=44%, list=35%, signal=66%
NEURON DEVELOPMENT%GOBP%GO:0048666	NEURON DEVELOPMENT%GOBP%GO:0048666		124	-0.256682	-1.18569	0.176176	0.60775	1	1384	tags=51%, list=44%, signal=88%
OPIOID SIGNALLING%REACTOME DATABASE ID RELEASE 72%111885	OPIOID SIGNALLING%REACTOME DATABASE ID RELEASE 72%111885		25	-0.33477	-1.18569	0.257642	0.606755	1	1286	tags=60%, list=41%, signal=101%
NEGATIVE REGULATION OF LEUKOCYTE CELL-CELL ADHESION%GOBP%GO:1903038	NEGATIVE REGULATION OF LEUKOCYTE CELL-CELL ADHESION%GOBP%GO:1903038		19	-0.345729	-1.18427	0.255814	0.610108	1	710	tags=37%, list=23%, signal=47%
FATTY ACID BIOSYNTHETIC PROCESS%GOBP%GO:0006633	FATTY ACID BIOSYNTHETIC PROCESS%GOBP%GO:0006633		20	-0.346838	-1.18327	0.267123	0.612022	1	221	tags=20%, list=7%, signal=21%
PID_RAC1_REG_PATHWAY%MSIGDB_C2%PID_RAC1_REG_PATHWAY	PID_RAC1_REG_PATHWAY%MSIGDB_C2%PID_RAC1_REG_PATHWAY		15	-0.373297	-1.18186	0.255648	0.615304	1	1541	tags=73%, list=49%, signal=144%
SHP2 SIGNALING%PATHWAY INTERACTION DATABASE NCI-NATURE CURATED DATA%SHP2 SIGNALING	SHP2 SIGNALING%PATHWAY INTERACTION DATABASE NCI-NATURE CURATED DATA%SHP2 SIGNALING		17	-0.362157	-1.18159	0.273465	0.615132	1	1600	tags=76%, list=51%, signal=156%
CELL MORPHOGENESIS INVOLVED IN DIFFERENTIATION%GOBP%GO:0000904	CELL MORPHOGENESIS INVOLVED IN DIFFERENTIATION%GOBP%GO:0000904		106	-0.260412	-1.1809	0.212702	0.616197	1	1607	tags=60%, list=52%, signal=120%
STIMULI-SENSING CHANNELS%REACTOME DATABASE ID RELEASE 72%2672351	STIMULI-SENSING CHANNELS%REACTOME DATABASE ID RELEASE 72%2672351		23	-0.335674	-1.18042	0.277528	0.6166	1	1475	tags=65%, list=47%, signal=123%
MAPK CASCADE%GOBP%GO:0000165	MAPK CASCADE%GOBP%GO:0000165		52	-0.282274	-1.1803	0.251277	0.615965	1	611	tags=31%, list=20%, signal=38%
TCR%NETPATH%TCR	TCR%NETPATH%TCR		57	-0.281031	-1.1797	0.240741	0.616784	1	1543	tags=58%, list=50%, signal=113%
GENERATION OF NEURONS%GOBP%GO:0048699	GENERATION OF NEURONS%GOBP%GO:0048699		227	-0.244911	-1.17937	0.128	0.616778	1	1288	tags=46%, list=41%, signal=72%
REGULATION OF PROTEIN TRANSPORT%GOBP%GO:0051223	REGULATION OF PROTEIN TRANSPORT%GOBP%GO:0051223		97	-0.263207	-1.17933	0.202621	0.615903	1	1042	tags=42%, list=33%, signal=62%
POSITIVE REGULATION OF OSTEOBLAST DIFFERENTIATION%GOBP%GO:0045669	POSITIVE REGULATION OF OSTEOBLAST DIFFERENTIATION%GOBP%GO:0045669		16	-0.365659	-1.17635	0.269095	0.62396	1	1278	tags=56%, list=41%, signal=95%
RENAL SYSTEM DEVELOPMENT%GOBP%GO:0072001	RENAL SYSTEM DEVELOPMENT%GOBP%GO:0072001		52	-0.286007	-1.17633	0.223022	0.622984	1	1361	tags=56%, list=44%, signal=97%
NEURON PROJECTION DEVELOPMENT%GOBP%GO:0031175	NEURON PROJECTION DEVELOPMENT%GOBP%GO:0031175		110	-0.255433	-1.17619	0.199396	0.622407	1	1384	tags=51%, list=44%, signal=88%
NEURON PROJECTION MORPHOGENESIS%GOBP%GO:0048812	NEURON PROJECTION MORPHOGENESIS%GOBP%GO:0048812		93	-0.257976	-1.17564	0.23108	0.622973	1	1607	tags=60%, list=52%, signal=121%
REGULATION OF CELLULAR COMPONENT SIZE%GOBP%GO:0032535	REGULATION OF CELLULAR COMPONENT SIZE%GOBP%GO:0032535		54	-0.281168	-1.17447	0.245418	0.625503	1	1298	tags=48%, list=42%, signal=81%
RESPONSE TO ORGANIC CYCLIC COMPOUND%GOBP%GO:0014070	RESPONSE TO ORGANIC CYCLIC COMPOUND%GOBP%GO:0014070		79	-0.268279	-1.1744	0.230691	0.624751	1	644	tags=27%, list=21%, signal=33%
NABA_COLLAGENS%MSIGDB_C2%NABA_COLLAGENS	NABA_COLLAGENS%MSIGDB_C2%NABA_COLLAGENS		24	-0.329356	-1.17363	0.277412	0.626088	1	1865	tags=88%, list=60%, signal=216%
VIRAL ACUTE MYOCARDITIS%WIKIPATHWAYS_20200510%WP4298%HOMO SAPIENS	VIRAL ACUTE MYOCARDITIS%WIKIPATHWAYS_20200510%WP4298%HOMO SAPIENS		17	-0.356707	-1.17354	0.273243	0.625326	1	1449	tags=65%, list=46%, signal=120%
COLLAGEN CHAIN TRIMERIZATION%REACTOME%R-HSA-8948216.2	COLLAGEN CHAIN TRIMERIZATION%REACTOME%R-HSA-8948216.2		24	-0.329356	-1.17293	0.260632	0.626195	1	1865	tags=88%, list=60%, signal=216%
CELL DEVELOPMENT%GOBP%GO:0048468	CELL DEVELOPMENT%GOBP%GO:0048468		251	-0.241711	-1.17223	0.143	0.627204	1	1558	tags=55%, list=50%, signal=101%
POSITIVE REGULATION OF ACTIN FILAMENT BUNDLE ASSEMBLY%GOBP%GO:0032233	POSITIVE REGULATION OF ACTIN FILAMENT BUNDLE ASSEMBLY%GOBP%GO:0032233		16	-0.359174	-1.17162	0.275498	0.628044	1	773	tags=38%, list=25%, signal=50%
AXONOGENESIS%GOBP%GO:0007409	AXONOGENESIS%GOBP%GO:0007409		73	-0.266681	-1.16982	0.245951	0.632629	1	1607	tags=60%, list=52%, signal=122%
REGULATION OF RAC1 ACTIVITY%PATHWAY INTERACTION DATABASE NCI-NATURE CURATED DATA%REGULATION OF RAC1 ACTIVITY	REGULATION OF RAC1 ACTIVITY%PATHWAY INTERACTION DATABASE NCI-NATURE CURATED DATA%REGULATION OF RAC1 ACTIVITY		15	-0.373297	-1.1697	0.282081	0.631982	1	1541	tags=73%, list=49%, signal=144%
REGULATION OF BMP SIGNALING PATHWAY%GOBP%GO:0030510	REGULATION OF BMP SIGNALING PATHWAY%GOBP%GO:0030510		18	-0.356977	-1.16855	0.282887	0.634356	1	1311	tags=67%, list=42%, signal=114%
BONE MORPHOGENESIS%GOBP%GO:0060349	BONE MORPHOGENESIS%GOBP%GO:0060349		21	-0.339223	-1.16849	0.292737	0.633563	1	1049	tags=48%, list=34%, signal=71%
RESPONSE TO LIPOPOLYSACCHARIDE%GOBP%GO:0032496	RESPONSE TO LIPOPOLYSACCHARIDE%GOBP%GO:0032496		37	-0.301488	-1.16741	0.25291	0.63593	1	806	tags=41%, list=26%, signal=54%
GLYCEROPHOSPHOLIPID BIOSYNTHETIC PROCESS%GOBP%GO:0046474	GLYCEROPHOSPHOLIPID BIOSYNTHETIC PROCESS%GOBP%GO:0046474		17	-0.356484	-1.16694	0.267717	0.636359	1	567	tags=29%, list=18%, signal=36%
CELL MATURATION%GOBP%GO:0048469	CELL MATURATION%GOBP%GO:0048469		16	-0.367436	-1.16655	0.306727	0.636536	1	536	tags=31%, list=17%, signal=38%
POSITIVE REGULATION OF PROTEIN SECRETION%GOBP%GO:0050714	POSITIVE REGULATION OF PROTEIN SECRETION%GOBP%GO:0050714		42	-0.289978	-1.16633	0.268595	0.636195	1	1009	tags=48%, list=32%, signal=69%
CELL SURFACE RECEPTOR SIGNALING PATHWAY%GOBP%GO:0007166	CELL SURFACE RECEPTOR SIGNALING PATHWAY%GOBP%GO:0007166		406	-0.237343	-1.16615	0.095	0.635783	1	1515	tags=54%, list=49%, signal=91%
CXCR4%IOB%CXCR4	CXCR4%IOB%CXCR4		20	-0.339442	-1.16456	0.269231	0.639477	1	1446	tags=60%, list=46%, signal=111%
REGULATION OF NEURON DEATH%GOBP%GO:1901214	REGULATION OF NEURON DEATH%GOBP%GO:1901214		44	-0.286667	-1.16384	0.267152	0.640686	1	1357	tags=55%, list=44%, signal=95%
LYMPHOCYTE ACTIVATION%GOBP%GO:0046649	LYMPHOCYTE ACTIVATION%GOBP%GO:0046649		75	-0.265564	-1.16377	0.240122	0.639886	1	1871	tags=77%, list=60%, signal=189%
HEMOSTASIS%REACTOME%R-HSA-109582.2	HEMOSTASIS%REACTOME%R-HSA-109582.2		163	-0.247621	-1.16201	0.177177	0.644324	1	1319	tags=48%, list=42%, signal=80%
CELL PROJECTION MORPHOGENESIS%GOBP%GO:0048858	CELL PROJECTION MORPHOGENESIS%GOBP%GO:0048858		93	-0.257976	-1.16162	0.240685	0.64448	1	1607	tags=60%, list=52%, signal=121%
DRUG METABOLIC PROCESS%GOBP%GO:0017144	DRUG METABOLIC PROCESS%GOBP%GO:0017144		68	-0.267313	-1.15998	0.260649	0.648524	1	861	tags=34%, list=28%, signal=46%
RESPONSE TO MOLECULE OF BACTERIAL ORIGIN%GOBP%GO:0002237	RESPONSE TO MOLECULE OF BACTERIAL ORIGIN%GOBP%GO:0002237		41	-0.29403	-1.15886	0.280295	0.650814	1	1031	tags=46%, list=33%, signal=68%
REGULATION OF HORMONE SECRETION%GOBP%GO:0046883	REGULATION OF HORMONE SECRETION%GOBP%GO:0046883		39	-0.292325	-1.15847	0.282427	0.650907	1	1308	tags=59%, list=42%, signal=100%
CELLULAR RESPONSE TO XENOBIOTIC STIMULUS%GOBP%GO:0071466	CELLULAR RESPONSE TO XENOBIOTIC STIMULUS%GOBP%GO:0071466		22	-0.325566	-1.15765	0.284141	0.65246	1	550	tags=27%, list=18%, signal=33%
REACTIVE OXYGEN SPECIES METABOLIC PROCESS%GOBP%GO:0072593	REACTIVE OXYGEN SPECIES METABOLIC PROCESS%GOBP%GO:0072593		18	-0.349152	-1.15648	0.283429	0.655013	1	1602	tags=72%, list=51%, signal=148%
RESPONSE TO METAL ION%GOBP%GO:0010038	RESPONSE TO METAL ION%GOBP%GO:0010038		42	-0.293402	-1.15598	0.280793	0.655572	1	878	tags=40%, list=28%, signal=56%
BREAST CANCER PATHWAY%WIKIPATHWAYS_20200510%WP4262%HOMO SAPIENS	BREAST CANCER PATHWAY%WIKIPATHWAYS_20200510%WP4262%HOMO SAPIENS		32	-0.306644	-1.15595	0.287701	0.654638	1	409	tags=22%, list=13%, signal=25%
HALLMARK_EPITHELIAL_MESENCHYMAL_TRANSITION%MSIGDB_C2%HALLMARK_EPITHELIAL_MESENCHYMAL_TRANSITION	HALLMARK_EPITHELIAL_MESENCHYMAL_TRANSITION%MSIGDB_C2%HALLMARK_EPITHELIAL_MESENCHYMAL_TRANSITION		104	-0.254078	-1.1548	0.229376	0.657082	1	1818	tags=71%, list=58%, signal=165%
POSITIVE REGULATION OF PROTEIN TRANSPORT%GOBP%GO:0051222	POSITIVE REGULATION OF PROTEIN TRANSPORT%GOBP%GO:0051222		56	-0.275431	-1.15399	0.288344	0.658498	1	1087	tags=46%, list=35%, signal=70%
POSITIVE REGULATION OF NEUROGENESIS%GOBP%GO:0050769	POSITIVE REGULATION OF NEUROGENESIS%GOBP%GO:0050769		62	-0.269336	-1.15382	0.279234	0.657982	1	1238	tags=47%, list=40%, signal=76%
REGULATION OF NERVOUS SYSTEM DEVELOPMENT%GOBP%GO:0051960	REGULATION OF NERVOUS SYSTEM DEVELOPMENT%GOBP%GO:0051960		134	-0.249008	-1.15299	0.210421	0.659462	1	1331	tags=49%, list=43%, signal=81%
ST_INTEGRIN_SIGNALING_PATHWAY%MSIGDB_C2%ST_INTEGRIN_SIGNALING_PATHWAY	ST_INTEGRIN_SIGNALING_PATHWAY%MSIGDB_C2%ST_INTEGRIN_SIGNALING_PATHWAY		19	-0.336975	-1.15287	0.304989	0.658837	1	1828	tags=84%, list=59%, signal=202%
APPENDAGE DEVELOPMENT%GOBP%GO:0048736	APPENDAGE DEVELOPMENT%GOBP%GO:0048736		16	-0.356591	-1.15245	0.281576	0.65913	1	288	tags=25%, list=9%, signal=27%
T-CELL ANTIGEN RECEPTOR (TCR) SIGNALING PATHWAY%WIKIPATHWAYS_20200510%WP69%HOMO SAPIENS	T-CELL ANTIGEN RECEPTOR (TCR) SIGNALING PATHWAY%WIKIPATHWAYS_20200510%WP69%HOMO SAPIENS		21	-0.333912	-1.15235	0.296095	0.658459	1	1744	tags=86%, list=56%, signal=193%
REGULATION OF ERK1 AND ERK2 CASCADE%GOBP%GO:0070372	REGULATION OF ERK1 AND ERK2 CASCADE%GOBP%GO:0070372		73	-0.262146	-1.15055	0.260914	0.662886	1	1053	tags=44%, list=34%, signal=65%
REGULATION OF HEART RATE%GOBP%GO:0002027	REGULATION OF HEART RATE%GOBP%GO:0002027		26	-0.319504	-1.14914	0.311062	0.66605	1	1132	tags=50%, list=36%, signal=78%
LEUKOCYTE CELL-CELL ADHESION%GOBP%GO:0007159	LEUKOCYTE CELL-CELL ADHESION%GOBP%GO:0007159		20	-0.341546	-1.14908	0.282998	0.665197	1	1102	tags=55%, list=35%, signal=85%
INTEGRINS IN ANGIOGENESIS%PATHWAY INTERACTION DATABASE NCI-NATURE CURATED DATA%INTEGRINS IN ANGIOGENESIS	INTEGRINS IN ANGIOGENESIS%PATHWAY INTERACTION DATABASE NCI-NATURE CURATED DATA%INTEGRINS IN ANGIOGENESIS		20	-0.343882	-1.14902	0.285877	0.664396	1	1865	tags=90%, list=60%, signal=223%
HORMONE METABOLIC PROCESS%GOBP%GO:0042445	HORMONE METABOLIC PROCESS%GOBP%GO:0042445		37	-0.295609	-1.14859	0.298117	0.664755	1	667	tags=32%, list=21%, signal=41%
REGULATION OF DEPHOSPHORYLATION%GOBP%GO:0035303	REGULATION OF DEPHOSPHORYLATION%GOBP%GO:0035303		21	-0.341164	-1.14799	0.302222	0.665556	1	823	tags=38%, list=26%, signal=51%
LYMPHOCYTE ACTIVATION INVOLVED IN IMMUNE RESPONSE%GOBP%GO:0002285	LYMPHOCYTE ACTIVATION INVOLVED IN IMMUNE RESPONSE%GOBP%GO:0002285		22	-0.321587	-1.14603	0.293478	0.670627	1	1233	tags=59%, list=40%, signal=97%
PLASMA MEMBRANE BOUNDED CELL PROJECTION MORPHOGENESIS%GOBP%GO:0120039	PLASMA MEMBRANE BOUNDED CELL PROJECTION MORPHOGENESIS%GOBP%GO:0120039		93	-0.257976	-1.14596	0.245473	0.669806	1	1607	tags=60%, list=52%, signal=121%
RESPONSE TO PURINE-CONTAINING COMPOUND%GOBP%GO:0014074	RESPONSE TO PURINE-CONTAINING COMPOUND%GOBP%GO:0014074		18	-0.348362	-1.14512	0.303653	0.671435	1	1454	tags=61%, list=47%, signal=114%
SKELETAL SYSTEM DEVELOPMENT%GOBP%GO:0001501	SKELETAL SYSTEM DEVELOPMENT%GOBP%GO:0001501		77	-0.264065	-1.14493	0.263211	0.671045	1	892	tags=35%, list=29%, signal=48%
GLIOGENESIS%GOBP%GO:0042063	GLIOGENESIS%GOBP%GO:0042063		24	-0.320272	-1.14384	0.295604	0.673369	1	326	tags=21%, list=10%, signal=23%
CELL PART MORPHOGENESIS%GOBP%GO:0032990	CELL PART MORPHOGENESIS%GOBP%GO:0032990		95	-0.255004	-1.14373	0.255556	0.672715	1	1607	tags=60%, list=52%, signal=120%
PID_AVB3_INTEGRIN_PATHWAY%MSIGDB_C2%PID_AVB3_INTEGRIN_PATHWAY	PID_AVB3_INTEGRIN_PATHWAY%MSIGDB_C2%PID_AVB3_INTEGRIN_PATHWAY		29	-0.306004	-1.14364	0.318132	0.671998	1	1376	tags=59%, list=44%, signal=104%
LEARNING%GOBP%GO:0007612	LEARNING%GOBP%GO:0007612		16	-0.352926	-1.14243	0.311243	0.674631	1	1947	tags=94%, list=62%, signal=248%
POSITIVE REGULATION OF PHOSPHOLIPASE C ACTIVITY%GOBP%GO:0010863	POSITIVE REGULATION OF PHOSPHOLIPASE C ACTIVITY%GOBP%GO:0010863		21	-0.329199	-1.13971	0.320356	0.68197	1	1677	tags=76%, list=54%, signal=164%
REGULATION OF DENDRITE DEVELOPMENT%GOBP%GO:0050773	REGULATION OF DENDRITE DEVELOPMENT%GOBP%GO:0050773		21	-0.327567	-1.13954	0.309577	0.681451	1	1238	tags=52%, list=40%, signal=86%
RESPONSE TO EXTERNAL STIMULUS%GOBP%GO:0009605	RESPONSE TO EXTERNAL STIMULUS%GOBP%GO:0009605		281	-0.235094	-1.13927	0.165	0.681305	1	1055	tags=38%, list=34%, signal=53%
REGULATION OF MULTICELLULAR ORGANISMAL DEVELOPMENT%GOBP%GO:2000026	REGULATION OF MULTICELLULAR ORGANISMAL DEVELOPMENT%GOBP%GO:2000026		357	-0.231795	-1.13787	0.16	0.68461	1	1311	tags=46%, list=42%, signal=71%
NERVOUS SYSTEM DEVELOPMENT%GOBP%GO:0007399	NERVOUS SYSTEM DEVELOPMENT%GOBP%GO:0007399		338	-0.232734	-1.13742	0.158	0.685023	1	1288	tags=44%, list=41%, signal=67%
REGULATION OF ESTABLISHMENT OF PROTEIN LOCALIZATION%GOBP%GO:0070201	REGULATION OF ESTABLISHMENT OF PROTEIN LOCALIZATION%GOBP%GO:0070201		100	-0.249657	-1.13731	0.252008	0.684364	1	1042	tags=41%, list=33%, signal=60%
REGULATION OF LOCALIZATION%GOBP%GO:0032879	REGULATION OF LOCALIZATION%GOBP%GO:0032879		485	-0.228642	-1.13721	0.144	0.68366	1	1497	tags=52%, list=48%, signal=84%
PLATELET DEGRANULATION%REACTOME%R-HSA-114608.3	PLATELET DEGRANULATION%REACTOME%R-HSA-114608.3		39	-0.288703	-1.13711	0.310053	0.682974	1	1118	tags=46%, list=36%, signal=71%
RESPONSE TO GROWTH FACTOR%GOBP%GO:0070848	RESPONSE TO GROWTH FACTOR%GOBP%GO:0070848		80	-0.257717	-1.13687	0.292089	0.682701	1	1542	tags=58%, list=49%, signal=111%
CARBOHYDRATE METABOLISM%REACTOME DATABASE ID RELEASE 72%71387	CARBOHYDRATE METABOLISM%REACTOME DATABASE ID RELEASE 72%71387		49	-0.277702	-1.13679	0.305641	0.681949	1	427	tags=20%, list=14%, signal=23%
SENSORY PERCEPTION%GOBP%GO:0007600	SENSORY PERCEPTION%GOBP%GO:0007600		37	-0.292546	-1.13605	0.301587	0.683214	1	1189	tags=51%, list=38%, signal=82%
CELL MORPHOGENESIS INVOLVED IN NEURON DIFFERENTIATION%GOBP%GO:0048667	CELL MORPHOGENESIS INVOLVED IN NEURON DIFFERENTIATION%GOBP%GO:0048667		82	-0.259678	-1.13541	0.272177	0.684197	1	1607	tags=60%, list=52%, signal=120%
REGULATION OF SYNAPSE ORGANIZATION%GOBP%GO:0050807	REGULATION OF SYNAPSE ORGANIZATION%GOBP%GO:0050807		28	-0.307374	-1.13541	0.320086	0.683205	1	1270	tags=57%, list=41%, signal=96%
CELL FATE COMMITMENT%GOBP%GO:0045165	CELL FATE COMMITMENT%GOBP%GO:0045165		33	-0.297241	-1.13534	0.307774	0.682439	1	1266	tags=48%, list=41%, signal=81%
POSITIVE REGULATION OF COLD-INDUCED THERMOGENESIS%GOBP%GO:0120162	POSITIVE REGULATION OF COLD-INDUCED THERMOGENESIS%GOBP%GO:0120162		18	-0.339019	-1.13505	0.319774	0.682324	1	740	tags=39%, list=24%, signal=51%
UROGENITAL SYSTEM DEVELOPMENT%GOBP%GO:0001655	UROGENITAL SYSTEM DEVELOPMENT%GOBP%GO:0001655		54	-0.271198	-1.13481	0.295918	0.68204	1	1361	tags=54%, list=44%, signal=94%
BRAIN-DERIVED NEUROTROPHIC FACTOR (BDNF) SIGNALING PATHWAY%WIKIPATHWAYS_20200510%WP2380%HOMO SAPIENS	BRAIN-DERIVED NEUROTROPHIC FACTOR (BDNF) SIGNALING PATHWAY%WIKIPATHWAYS_20200510%WP2380%HOMO SAPIENS		26	-0.314828	-1.1342	0.321272	0.682865	1	559	tags=27%, list=18%, signal=33%
RESPONSE TO XENOBIOTIC STIMULUS%GOBP%GO:0009410	RESPONSE TO XENOBIOTIC STIMULUS%GOBP%GO:0009410		22	-0.325566	-1.13337	0.335189	0.684406	1	550	tags=27%, list=18%, signal=33%
MULTI-ORGANISM PROCESS%GOBP%GO:0051704	MULTI-ORGANISM PROCESS%GOBP%GO:0051704		196	-0.238632	-1.13313	0.201201	0.684083	1	991	tags=39%, list=32%, signal=54%
LUNG FIBROSIS%WIKIPATHWAYS_20200510%WP3624%HOMO SAPIENS	LUNG FIBROSIS%WIKIPATHWAYS_20200510%WP3624%HOMO SAPIENS		19	-0.340577	-1.13206	0.306122	0.686339	1	1323	tags=63%, list=42%, signal=109%
GLYCEROPHOSPHOLIPID METABOLIC PROCESS%GOBP%GO:0006650	GLYCEROPHOSPHOLIPID METABOLIC PROCESS%GOBP%GO:0006650		35	-0.290804	-1.13186	0.314103	0.685954	1	567	tags=26%, list=18%, signal=31%
NEUROGENESIS%GOBP%GO:0022008	NEUROGENESIS%GOBP%GO:0022008		243	-0.234345	-1.13179	0.189189	0.685186	1	1288	tags=45%, list=41%, signal=70%
INTEGRIN CELL SURFACE INTERACTIONS%REACTOME%R-HSA-216083.2	INTEGRIN CELL SURFACE INTERACTIONS%REACTOME%R-HSA-216083.2		36	-0.293113	-1.13147	0.297355	0.685161	1	1446	tags=67%, list=46%, signal=123%
REGULATION OF CELL DEVELOPMENT%GOBP%GO:0060284	REGULATION OF CELL DEVELOPMENT%GOBP%GO:0060284		146	-0.24451	-1.13139	0.244	0.684422	1	1288	tags=47%, list=41%, signal=76%
RESPONSE TO OXYGEN-CONTAINING COMPOUND%GOBP%GO:1901700	RESPONSE TO OXYGEN-CONTAINING COMPOUND%GOBP%GO:1901700		180	-0.23936	-1.13129	0.231231	0.683758	1	1066	tags=38%, list=34%, signal=54%
SECRETION%GOBP%GO:0046903	SECRETION%GOBP%GO:0046903		218	-0.236833	-1.13117	0.202	0.683147	1	1130	tags=41%, list=36%, signal=60%
NEGATIVE REGULATION OF HEMOPOIESIS%GOBP%GO:1903707	NEGATIVE REGULATION OF HEMOPOIESIS%GOBP%GO:1903707		15	-0.359286	-1.13022	0.315912	0.685137	1	1026	tags=47%, list=33%, signal=69%
REGULATION OF NEURON PROJECTION DEVELOPMENT%GOBP%GO:0010975	REGULATION OF NEURON PROJECTION DEVELOPMENT%GOBP%GO:0010975		73	-0.258397	-1.12997	0.294534	0.684924	1	1288	tags=48%, list=41%, signal=80%
CELLULAR RESPONSE TO CHEMICAL STIMULUS%GOBP%GO:0070887	CELLULAR RESPONSE TO CHEMICAL STIMULUS%GOBP%GO:0070887		418	-0.228699	-1.12996	0.151	0.68397	1	1310	tags=45%, list=42%, signal=67%
FOCAL ADHESION%WIKIPATHWAYS_20200510%WP306%HOMO SAPIENS	FOCAL ADHESION%WIKIPATHWAYS_20200510%WP306%HOMO SAPIENS		61	-0.263761	-1.12996	0.317671	0.683002	1	1973	tags=77%, list=63%, signal=206%
REGULATION OF PROTEIN COMPLEX DISASSEMBLY%GOBP%GO:0043244	REGULATION OF PROTEIN COMPLEX DISASSEMBLY%GOBP%GO:0043244		15	-0.351866	-1.12963	0.340723	0.683017	1	201	tags=20%, list=6%, signal=21%
INTERLEUKIN-10 SIGNALING%REACTOME DATABASE ID RELEASE 72%6783783	INTERLEUKIN-10 SIGNALING%REACTOME DATABASE ID RELEASE 72%6783783		18	-0.346264	-1.1287	0.319681	0.684929	1	1326	tags=67%, list=43%, signal=115%
LIMB DEVELOPMENT%GOBP%GO:0060173	LIMB DEVELOPMENT%GOBP%GO:0060173		16	-0.356591	-1.12572	0.321974	0.692955	1	288	tags=25%, list=9%, signal=27%
SIGNALING PATHWAYS%REACTOME DATABASE ID RELEASE 72%162582	SIGNALING PATHWAYS%REACTOME DATABASE ID RELEASE 72%162582		459	-0.224947	-1.12528	0.159	0.693316	1	1553	tags=54%, list=50%, signal=93%
REGULATION OF INTRACELLULAR TRANSPORT%GOBP%GO:0032386	REGULATION OF INTRACELLULAR TRANSPORT%GOBP%GO:0032386		45	-0.278695	-1.12255	0.326446	0.700736	1	1035	tags=40%, list=33%, signal=59%
CELLULAR RESPONSE TO ORGANIC SUBSTANCE%GOBP%GO:0071310	CELLULAR RESPONSE TO ORGANIC SUBSTANCE%GOBP%GO:0071310		346	-0.228863	-1.12241	0.187	0.700164	1	1361	tags=47%, list=44%, signal=73%
CELL JUNCTION ASSEMBLY%GOBP%GO:0034329	CELL JUNCTION ASSEMBLY%GOBP%GO:0034329		44	-0.277334	-1.1209	0.322314	0.703792	1	617	tags=30%, list=20%, signal=36%
KIDNEY DEVELOPMENT%GOBP%GO:0001822	KIDNEY DEVELOPMENT%GOBP%GO:0001822		49	-0.271363	-1.12083	0.331622	0.703011	1	611	tags=31%, list=20%, signal=37%
POSITIVE REGULATION OF TUMOR NECROSIS FACTOR PRODUCTION%GOBP%GO:0032760	POSITIVE REGULATION OF TUMOR NECROSIS FACTOR PRODUCTION%GOBP%GO:0032760		18	-0.340563	-1.1206	0.333709	0.702683	1	1206	tags=56%, list=39%, signal=90%
HALLMARK_INTERFERON_GAMMA_RESPONSE%MSIGDB_C2%HALLMARK_INTERFERON_GAMMA_RESPONSE	HALLMARK_INTERFERON_GAMMA_RESPONSE%MSIGDB_C2%HALLMARK_INTERFERON_GAMMA_RESPONSE		58	-0.265888	-1.1206	0.315628	0.701712	1	1360	tags=50%, list=44%, signal=87%
PDGFR-BETA SIGNALING PATHWAY%PATHWAY INTERACTION DATABASE NCI-NATURE CURATED DATA%PDGFR-BETA SIGNALING PATHWAY	PDGFR-BETA SIGNALING PATHWAY%PATHWAY INTERACTION DATABASE NCI-NATURE CURATED DATA%PDGFR-BETA SIGNALING PATHWAY		20	-0.332278	-1.12053	0.322545	0.700915	1	743	tags=35%, list=24%, signal=46%
ENERGY DERIVATION BY OXIDATION OF ORGANIC COMPOUNDS%GOBP%GO:0015980	ENERGY DERIVATION BY OXIDATION OF ORGANIC COMPOUNDS%GOBP%GO:0015980		16	-0.350149	-1.12026	0.338804	0.700779	1	1357	tags=56%, list=44%, signal=99%
SPINAL CORD INJURY%WIKIPATHWAYS_20200510%WP2431%HOMO SAPIENS	SPINAL CORD INJURY%WIKIPATHWAYS_20200510%WP2431%HOMO SAPIENS		32	-0.29872	-1.11962	0.33509	0.701672	1	1265	tags=53%, list=41%, signal=88%
LOCOMOTION%GOBP%GO:0040011	LOCOMOTION%GOBP%GO:0040011		256	-0.231693	-1.11958	0.211211	0.700807	1	1511	tags=55%, list=48%, signal=97%
NEPHRON DEVELOPMENT%GOBP%GO:0072006	NEPHRON DEVELOPMENT%GOBP%GO:0072006		27	-0.306586	-1.11916	0.327133	0.701094	1	1542	tags=67%, list=49%, signal=131%
PLATELET DEGRANULATION%GOBP%GO:0002576	PLATELET DEGRANULATION%GOBP%GO:0002576		40	-0.282277	-1.11883	0.310995	0.701058	1	1118	tags=45%, list=36%, signal=69%
SECRETION BY CELL%GOBP%GO:0032940	SECRETION BY CELL%GOBP%GO:0032940		211	-0.234939	-1.11847	0.242242	0.701203	1	1130	tags=41%, list=36%, signal=60%
O-LINKED GLYCOSYLATION%REACTOME%R-HSA-5173105.4	O-LINKED GLYCOSYLATION%REACTOME%R-HSA-5173105.4		30	-0.294095	-1.11839	0.331183	0.700472	1	1347	tags=53%, list=43%, signal=93%
ADIPOGENESIS%WIKIPATHWAYS_20200510%WP236%HOMO SAPIENS	ADIPOGENESIS%WIKIPATHWAYS_20200510%WP236%HOMO SAPIENS		38	-0.288846	-1.11779	0.328406	0.701416	1	906	tags=37%, list=29%, signal=51%
RESPONSE TO REACTIVE OXYGEN SPECIES%GOBP%GO:0000302	RESPONSE TO REACTIVE OXYGEN SPECIES%GOBP%GO:0000302		17	-0.346835	-1.11531	0.351936	0.708031	1	1493	tags=71%, list=48%, signal=135%
REGULATION OF CARDIAC MUSCLE CELL CONTRACTION%GOBP%GO:0086004	REGULATION OF CARDIAC MUSCLE CELL CONTRACTION%GOBP%GO:0086004		16	-0.343727	-1.11279	0.346847	0.714699	1	114	tags=19%, list=4%, signal=19%
T CELL ACTIVATION%PANTHER PATHWAY%P00053	T CELL ACTIVATION%PANTHER PATHWAY%P00053		15	-0.351107	-1.11266	0.340426	0.714125	1	1744	tags=80%, list=56%, signal=181%
NEURON DIFFERENTIATION%GOBP%GO:0030182	NEURON DIFFERENTIATION%GOBP%GO:0030182		150	-0.239139	-1.11265	0.276276	0.713141	1	1384	tags=49%, list=44%, signal=84%
NEGATIVE REGULATION OF IMMUNE SYSTEM PROCESS%GOBP%GO:0002683	NEGATIVE REGULATION OF IMMUNE SYSTEM PROCESS%GOBP%GO:0002683		71	-0.25724	-1.11238	0.322906	0.712974	1	1026	tags=39%, list=33%, signal=57%
POSITIVE REGULATION OF TUMOR NECROSIS FACTOR SUPERFAMILY CYTOKINE PRODUCTION%GOBP%GO:1903557	POSITIVE REGULATION OF TUMOR NECROSIS FACTOR SUPERFAMILY CYTOKINE PRODUCTION%GOBP%GO:1903557		19	-0.32944	-1.11034	0.354072	0.718277	1	1412	tags=63%, list=45%, signal=115%
REGULATION OF CELL GROWTH%GOBP%GO:0001558	REGULATION OF CELL GROWTH%GOBP%GO:0001558		64	-0.259709	-1.10986	0.314402	0.718726	1	1360	tags=48%, list=44%, signal=84%
REGULATION OF DEVELOPMENTAL GROWTH%GOBP%GO:0048638	REGULATION OF DEVELOPMENTAL GROWTH%GOBP%GO:0048638		38	-0.282996	-1.10981	0.361925	0.717875	1	1462	tags=55%, list=47%, signal=103%
SEMAPHORIN INTERACTIONS%REACTOME DATABASE ID RELEASE 72%373755	SEMAPHORIN INTERACTIONS%REACTOME DATABASE ID RELEASE 72%373755		19	-0.329999	-1.10967	0.348571	0.717303	1	918	tags=37%, list=29%, signal=52%
MEMBRANE FUSION%GOBP%GO:0061025	MEMBRANE FUSION%GOBP%GO:0061025		18	-0.335563	-1.10932	0.341981	0.717375	1	1614	tags=72%, list=52%, signal=149%
EXTRACELLULAR MATRIX DISASSEMBLY%GOBP%GO:0022617	EXTRACELLULAR MATRIX DISASSEMBLY%GOBP%GO:0022617		30	-0.296528	-1.10892	0.344121	0.717661	1	340	tags=23%, list=11%, signal=26%
B CELL RECEPTOR SIGNALING PATHWAY%WIKIPATHWAYS_20200510%WP23%HOMO SAPIENS	B CELL RECEPTOR SIGNALING PATHWAY%WIKIPATHWAYS_20200510%WP23%HOMO SAPIENS		15	-0.352825	-1.10805	0.353571	0.719388	1	1472	tags=67%, list=47%, signal=126%
POSITIVE REGULATION OF SMALL GTPASE MEDIATED SIGNAL TRANSDUCTION%GOBP%GO:0051057	POSITIVE REGULATION OF SMALL GTPASE MEDIATED SIGNAL TRANSDUCTION%GOBP%GO:0051057		15	-0.348689	-1.10751	0.356895	0.720072	1	1186	tags=53%, list=38%, signal=86%
POST-TRANSLATIONAL PROTEIN MODIFICATION%GOBP%GO:0043687	POST-TRANSLATIONAL PROTEIN MODIFICATION%GOBP%GO:0043687		40	-0.279148	-1.10704	0.320419	0.720543	1	336	tags=20%, list=11%, signal=22%
NEGATIVE REGULATION OF NF-KAPPAB TRANSCRIPTION FACTOR ACTIVITY%GOBP%GO:0032088	NEGATIVE REGULATION OF NF-KAPPAB TRANSCRIPTION FACTOR ACTIVITY%GOBP%GO:0032088		15	-0.352696	-1.10675	0.351788	0.720427	1	1654	tags=73%, list=53%, signal=155%
GO ID NOT FOUND IN OBO FILE ONTOLOGY DEFINITIONS%GOBP%GO:0150104	GO ID NOT FOUND IN OBO FILE ONTOLOGY DEFINITIONS%GOBP%GO:0150104		25	-0.309518	-1.10662	0.360087	0.719818	1	671	tags=32%, list=22%, signal=40%
EXTRACELLULAR STRUCTURE ORGANIZATION%GOBP%GO:0043062	EXTRACELLULAR STRUCTURE ORGANIZATION%GOBP%GO:0043062		133	-0.2399	-1.10659	0.301811	0.718923	1	1458	tags=55%, list=47%, signal=99%
REGULATION OF LYMPHOCYTE DIFFERENTIATION%GOBP%GO:0045619	REGULATION OF LYMPHOCYTE DIFFERENTIATION%GOBP%GO:0045619		28	-0.294817	-1.10559	0.352941	0.721078	1	1551	tags=64%, list=50%, signal=127%
HUNTINGTON DISEASE%PANTHER PATHWAY%P00029	HUNTINGTON DISEASE%PANTHER PATHWAY%P00029		19	-0.324227	-1.10093	0.340935	0.734159	1	938	tags=42%, list=30%, signal=60%
REGULATION OF T CELL DIFFERENTIATION%GOBP%GO:0045580	REGULATION OF T CELL DIFFERENTIATION%GOBP%GO:0045580		22	-0.319573	-1.09921	0.356436	0.738304	1	1080	tags=50%, list=35%, signal=76%
DIFFERENTIATION PATHWAY%WIKIPATHWAYS_20200510%WP2848%HOMO SAPIENS	DIFFERENTIATION PATHWAY%WIKIPATHWAYS_20200510%WP2848%HOMO SAPIENS		15	-0.346664	-1.0987	0.350478	0.738949	1	365	tags=27%, list=12%, signal=30%
SKELETAL SYSTEM MORPHOGENESIS%GOBP%GO:0048705	SKELETAL SYSTEM MORPHOGENESIS%GOBP%GO:0048705		32	-0.285571	-1.09667	0.367061	0.744166	1	1376	tags=53%, list=44%, signal=94%
REGULATION OF SYNAPSE STRUCTURE OR ACTIVITY%GOBP%GO:0050803	REGULATION OF SYNAPSE STRUCTURE OR ACTIVITY%GOBP%GO:0050803		29	-0.295278	-1.09664	0.367021	0.743239	1	1336	tags=59%, list=43%, signal=102%
POSITIVE REGULATION OF INFLAMMATORY RESPONSE%GOBP%GO:0050729	POSITIVE REGULATION OF INFLAMMATORY RESPONSE%GOBP%GO:0050729		22	-0.31345	-1.09654	0.35658	0.742513	1	1278	tags=59%, list=41%, signal=99%
HEART VALVE DEVELOPMENT%GOBP%GO:0003170	HEART VALVE DEVELOPMENT%GOBP%GO:0003170		16	-0.344677	-1.0946	0.357895	0.747565	1	1493	tags=69%, list=48%, signal=131%
REGULATION OF LEUKOCYTE MEDIATED IMMUNITY%GOBP%GO:0002703	REGULATION OF LEUKOCYTE MEDIATED IMMUNITY%GOBP%GO:0002703		34	-0.288419	-1.09345	0.367347	0.750177	1	1360	tags=59%, list=44%, signal=103%
REGULATION OF LIPASE ACTIVITY%GOBP%GO:0060191	REGULATION OF LIPASE ACTIVITY%GOBP%GO:0060191		31	-0.29172	-1.0934	0.358811	0.74935	1	1778	tags=74%, list=57%, signal=171%
PLC BETA MEDIATED EVENTS%REACTOME%R-HSA-112043.1	PLC BETA MEDIATED EVENTS%REACTOME%R-HSA-112043.1		16	-0.339332	-1.09294	0.369441	0.749803	1	1984	tags=94%, list=64%, signal=257%
DISEASES OF GLYCOSYLATION%REACTOME%R-HSA-3781865.1	DISEASES OF GLYCOSYLATION%REACTOME%R-HSA-3781865.1		38	-0.280991	-1.09269	0.373684	0.749594	1	438	tags=24%, list=14%, signal=27%
REGULATION OF CELL CYCLE ARREST%GOBP%GO:0071156	REGULATION OF CELL CYCLE ARREST%GOBP%GO:0071156		15	-0.344924	-1.0921	0.372685	0.750393	1	144	tags=13%, list=5%, signal=14%
SYNAPSE ASSEMBLY%GOBP%GO:0007416	SYNAPSE ASSEMBLY%GOBP%GO:0007416		17	-0.335272	-1.09189	0.376861	0.750018	1	1027	tags=47%, list=33%, signal=70%
G-PROTEIN MEDIATED EVENTS%REACTOME%R-HSA-112040.1	G-PROTEIN MEDIATED EVENTS%REACTOME%R-HSA-112040.1		16	-0.339332	-1.09121	0.368298	0.751153	1	1984	tags=94%, list=64%, signal=257%
REGULATION OF SMOOTH MUSCLE CELL PROLIFERATION%GOBP%GO:0048660	REGULATION OF SMOOTH MUSCLE CELL PROLIFERATION%GOBP%GO:0048660		24	-0.298581	-1.09098	0.381375	0.750818	1	1542	tags=63%, list=49%, signal=123%
GENES INVOLVED IN MALE INFERTILITY%WIKIPATHWAYS_20200510%WP4673%HOMO SAPIENS	GENES INVOLVED IN MALE INFERTILITY%WIKIPATHWAYS_20200510%WP4673%HOMO SAPIENS		26	-0.298867	-1.09065	0.340732	0.750852	1	1493	tags=62%, list=48%, signal=117%
CELL-CELL JUNCTION ORGANIZATION%REACTOME%R-HSA-421270.4	CELL-CELL JUNCTION ORGANIZATION%REACTOME%R-HSA-421270.4		21	-0.313454	-1.09047	0.372352	0.750428	1	617	tags=33%, list=20%, signal=41%
RESPONSE TO AMYLOID-BETA%GOBP%GO:1904645	RESPONSE TO AMYLOID-BETA%GOBP%GO:1904645		15	-0.345061	-1.09035	0.367561	0.749778	1	1836	tags=87%, list=59%, signal=210%
REGULATION OF DEVELOPMENTAL PROCESS%GOBP%GO:0050793	REGULATION OF DEVELOPMENTAL PROCESS%GOBP%GO:0050793		458	-0.21955	-1.08957	0.232	0.751122	1	1288	tags=44%, list=41%, signal=63%
POSITIVE REGULATION OF SYNAPTIC TRANSMISSION%GOBP%GO:0050806	POSITIVE REGULATION OF SYNAPTIC TRANSMISSION%GOBP%GO:0050806		20	-0.314642	-1.0883	0.379505	0.754082	1	1312	tags=60%, list=42%, signal=103%
ANATOMICAL STRUCTURE HOMEOSTASIS%GOBP%GO:0060249	ANATOMICAL STRUCTURE HOMEOSTASIS%GOBP%GO:0060249		29	-0.291206	-1.08788	0.366013	0.75437	1	1554	tags=62%, list=50%, signal=123%
CIRCADIAN RHYTHM RELATED GENES%WIKIPATHWAYS_20200510%WP3594%HOMO SAPIENS	CIRCADIAN RHYTHM RELATED GENES%WIKIPATHWAYS_20200510%WP3594%HOMO SAPIENS		27	-0.296711	-1.08763	0.36	0.754175	1	232	tags=19%, list=7%, signal=20%
REGULATION OF GLIOGENESIS%GOBP%GO:0014013	REGULATION OF GLIOGENESIS%GOBP%GO:0014013		17	-0.337498	-1.08751	0.369143	0.753512	1	1383	tags=59%, list=44%, signal=105%
RESPONSE TO HYPOXIA%GOBP%GO:0001666	RESPONSE TO HYPOXIA%GOBP%GO:0001666		28	-0.287607	-1.08431	0.381663	0.762356	1	344	tags=21%, list=11%, signal=24%
REGULATION OF PHOSPHOLIPASE C ACTIVITY%GOBP%GO:1900274	REGULATION OF PHOSPHOLIPASE C ACTIVITY%GOBP%GO:1900274		22	-0.3069	-1.08398	0.369684	0.762376	1	1677	tags=73%, list=54%, signal=156%
POSITIVE REGULATION OF CELL PROJECTION ORGANIZATION%GOBP%GO:0031346	POSITIVE REGULATION OF CELL PROJECTION ORGANIZATION%GOBP%GO:0031346		56	-0.261655	-1.08354	0.373593	0.762713	1	1238	tags=45%, list=40%, signal=73%
NABA_MATRISOME%MSIGDB_C2%NABA_MATRISOME	NABA_MATRISOME%MSIGDB_C2%NABA_MATRISOME		335	-0.22236	-1.08274	0.288	0.764148	1	1352	tags=50%, list=43%, signal=79%
IMMUNE EFFECTOR PROCESS%GOBP%GO:0002252	IMMUNE EFFECTOR PROCESS%GOBP%GO:0002252		210	-0.226059	-1.08129	0.322	0.767543	1	1150	tags=39%, list=37%, signal=58%
GLIAL CELL DEVELOPMENT%GOBP%GO:0021782	GLIAL CELL DEVELOPMENT%GOBP%GO:0021782		15	-0.340566	-1.08112	0.382831	0.767086	1	273	tags=20%, list=9%, signal=22%
LEARNING OR MEMORY%GOBP%GO:0007611	LEARNING OR MEMORY%GOBP%GO:0007611		34	-0.27902	-1.07955	0.388235	0.770823	1	715	tags=32%, list=23%, signal=42%
PID_IL4_2PATHWAY%MSIGDB_C2%PID_IL4_2PATHWAY	PID_IL4_2PATHWAY%MSIGDB_C2%PID_IL4_2PATHWAY		15	-0.338598	-1.07913	0.369942	0.771109	1	1189	tags=53%, list=38%, signal=86%
EXOCYTOSIS%GOBP%GO:0006887	EXOCYTOSIS%GOBP%GO:0006887		186	-0.228388	-1.07905	0.331	0.770355	1	1130	tags=40%, list=36%, signal=59%
RESPONSE TO ELEVATED PLATELET CYTOSOLIC CA2+%REACTOME%R-HSA-76005.2	RESPONSE TO ELEVATED PLATELET CYTOSOLIC CA2+%REACTOME%R-HSA-76005.2		41	-0.269188	-1.07856	0.373041	0.770828	1	1118	tags=44%, list=36%, signal=68%
REGULATION OF PROTEIN COMPLEX ASSEMBLY%GOBP%GO:0043254	REGULATION OF PROTEIN COMPLEX ASSEMBLY%GOBP%GO:0043254		60	-0.254244	-1.07677	0.368367	0.775223	1	1876	tags=73%, list=60%, signal=181%
CELLULAR RESPONSE TO OXYGEN-CONTAINING COMPOUND%GOBP%GO:1901701	CELLULAR RESPONSE TO OXYGEN-CONTAINING COMPOUND%GOBP%GO:1901701		143	-0.230728	-1.0767	0.351703	0.774437	1	1066	tags=37%, list=34%, signal=54%
INNATE IMMUNE SYSTEM%REACTOME DATABASE ID RELEASE 72%168249	INNATE IMMUNE SYSTEM%REACTOME DATABASE ID RELEASE 72%168249		210	-0.22523	-1.07667	0.329329	0.773511	1	1012	tags=35%, list=32%, signal=49%
TRANSPORT OF SMALL MOLECULES%REACTOME%R-HSA-382551.5	TRANSPORT OF SMALL MOLECULES%REACTOME%R-HSA-382551.5		117	-0.234548	-1.07653	0.357789	0.772942	1	1350	tags=48%, list=43%, signal=81%
ENZYME LINKED RECEPTOR PROTEIN SIGNALING PATHWAY%GOBP%GO:0007167	ENZYME LINKED RECEPTOR PROTEIN SIGNALING PATHWAY%GOBP%GO:0007167		141	-0.231691	-1.07559	0.336673	0.774727	1	1542	tags=56%, list=49%, signal=106%
DEGRADATION OF THE EXTRACELLULAR MATRIX%REACTOME DATABASE ID RELEASE 72%1474228	DEGRADATION OF THE EXTRACELLULAR MATRIX%REACTOME DATABASE ID RELEASE 72%1474228		44	-0.265085	-1.07331	0.388831	0.780559	1	608	tags=27%, list=20%, signal=33%
EXTRACELLULAR MATRIX ORGANIZATION%GOBP%GO:0030198	EXTRACELLULAR MATRIX ORGANIZATION%GOBP%GO:0030198		123	-0.230974	-1.07034	0.371113	0.788528	1	1458	tags=54%, list=47%, signal=98%
THYROTROPIN-RELEASING HORMONE RECEPTOR SIGNALING PATHWAY%PANTHER PATHWAY%P04394	THYROTROPIN-RELEASING HORMONE RECEPTOR SIGNALING PATHWAY%PANTHER PATHWAY%P04394		16	-0.339334	-1.07027	0.385246	0.787708	1	1984	tags=94%, list=64%, signal=257%
LOCALIZATION OF CELL%GOBP%GO:0051674	LOCALIZATION OF CELL%GOBP%GO:0051674		212	-0.223725	-1.06848	0.346	0.79208	1	1542	tags=56%, list=49%, signal=103%
POSITIVE REGULATION OF CELL MIGRATION%GOBP%GO:0030335	POSITIVE REGULATION OF CELL MIGRATION%GOBP%GO:0030335		116	-0.233305	-1.06801	0.376884	0.792532	1	1310	tags=47%, list=42%, signal=77%
CARBOHYDRATE DERIVATIVE CATABOLIC PROCESS%GOBP%GO:1901136	CARBOHYDRATE DERIVATIVE CATABOLIC PROCESS%GOBP%GO:1901136		38	-0.270224	-1.06766	0.400628	0.792633	1	212	tags=16%, list=7%, signal=17%
CELLULAR RESPONSE TO BMP STIMULUS%GOBP%GO:0071773	CELLULAR RESPONSE TO BMP STIMULUS%GOBP%GO:0071773		19	-0.314474	-1.06735	0.40339	0.792523	1	1204	tags=47%, list=39%, signal=77%
TNFALPHA%IOB%TNFALPHA	TNFALPHA%IOB%TNFALPHA		17	-0.328938	-1.0669	0.391705	0.792886	1	575	tags=29%, list=18%, signal=36%
RESPONSE TO ABIOTIC STIMULUS%GOBP%GO:0009628	RESPONSE TO ABIOTIC STIMULUS%GOBP%GO:0009628		100	-0.236341	-1.06645	0.359438	0.793246	1	1053	tags=35%, list=34%, signal=51%
GASTRULATION%GOBP%GO:0007369	GASTRULATION%GOBP%GO:0007369		24	-0.29563	-1.06606	0.410989	0.7934	1	1446	tags=63%, list=46%, signal=116%
POSITIVE REGULATION OF ESTABLISHMENT OF PROTEIN LOCALIZATION%GOBP%GO:1904951	POSITIVE REGULATION OF ESTABLISHMENT OF PROTEIN LOCALIZATION%GOBP%GO:1904951		59	-0.252838	-1.06532	0.392057	0.794557	1	1087	tags=44%, list=35%, signal=66%
REGULATION OF STAT CASCADE%GOBP%GO:1904892	REGULATION OF STAT CASCADE%GOBP%GO:1904892		17	-0.327836	-1.06466	0.391206	0.795453	1	1233	tags=53%, list=40%, signal=87%
ENDOCHONDRAL OSSIFICATION%WIKIPATHWAYS_20200510%WP474%HOMO SAPIENS	ENDOCHONDRAL OSSIFICATION%WIKIPATHWAYS_20200510%WP474%HOMO SAPIENS		27	-0.292526	-1.06383	0.384193	0.796921	1	1125	tags=44%, list=36%, signal=69%
CELL JUNCTION ORGANIZATION%REACTOME DATABASE ID RELEASE 72%446728	CELL JUNCTION ORGANIZATION%REACTOME DATABASE ID RELEASE 72%446728		31	-0.280608	-1.06319	0.402139	0.797852	1	617	tags=29%, list=20%, signal=36%
AGING%GOBP%GO:0007568	AGING%GOBP%GO:0007568		18	-0.320693	-1.06298	0.39934	0.797446	1	285	tags=22%, list=9%, signal=24%
CELL MOTILITY%GOBP%GO:0048870	CELL MOTILITY%GOBP%GO:0048870		212	-0.223725	-1.06281	0.361	0.796944	1	1542	tags=56%, list=49%, signal=103%
B CELL DIFFERENTIATION%GOBP%GO:0030183	B CELL DIFFERENTIATION%GOBP%GO:0030183		19	-0.320694	-1.06243	0.410372	0.79703	1	1826	tags=84%, list=59%, signal=202%
RESPONSE TO OXYGEN LEVELS%GOBP%GO:0070482	RESPONSE TO OXYGEN LEVELS%GOBP%GO:0070482		28	-0.287607	-1.06233	0.403621	0.796352	1	344	tags=21%, list=11%, signal=24%
ANION TRANSPORT%GOBP%GO:0006820	ANION TRANSPORT%GOBP%GO:0006820		73	-0.246384	-1.0622	0.402848	0.795756	1	1222	tags=44%, list=39%, signal=70%
REGULATION OF PLASMA LIPOPROTEIN PARTICLE LEVELS%GOBP%GO:0097006	REGULATION OF PLASMA LIPOPROTEIN PARTICLE LEVELS%GOBP%GO:0097006		16	-0.325853	-1.06088	0.418118	0.798678	1	809	tags=38%, list=26%, signal=50%
HALLMARK_KRAS_SIGNALING_UP%MSIGDB_C2%HALLMARK_KRAS_SIGNALING_UP	HALLMARK_KRAS_SIGNALING_UP%MSIGDB_C2%HALLMARK_KRAS_SIGNALING_UP		81	-0.243519	-1.06007	0.392713	0.800124	1	1319	tags=47%, list=42%, signal=79%
RESPONSE TO DECREASED OXYGEN LEVELS%GOBP%GO:0036293	RESPONSE TO DECREASED OXYGEN LEVELS%GOBP%GO:0036293		28	-0.287607	-1.05947	0.427332	0.800886	1	344	tags=21%, list=11%, signal=24%
RENAL SYSTEM PROCESS%GOBP%GO:0003014	RENAL SYSTEM PROCESS%GOBP%GO:0003014		22	-0.305086	-1.05898	0.428101	0.801408	1	1429	tags=59%, list=46%, signal=108%
NEGATIVE REGULATION OF MULTICELLULAR ORGANISMAL PROCESS%GOBP%GO:0051241	NEGATIVE REGULATION OF MULTICELLULAR ORGANISMAL PROCESS%GOBP%GO:0051241		201	-0.223042	-1.05859	0.368368	0.801617	1	1566	tags=56%, list=50%, signal=105%
ENSHEATHMENT OF NEURONS%GOBP%GO:0007272	ENSHEATHMENT OF NEURONS%GOBP%GO:0007272		15	-0.339312	-1.05835	0.396532	0.801349	1	491	tags=27%, list=16%, signal=32%
RESPONSE TO OTHER ORGANISM%GOBP%GO:0051707	RESPONSE TO OTHER ORGANISM%GOBP%GO:0051707		119	-0.230304	-1.05831	0.389728	0.800462	1	977	tags=39%, list=31%, signal=55%
ENDOCHONDRAL OSSIFICATION WITH SKELETAL DYSPLASIAS%WIKIPATHWAYS_20200510%WP4808%HOMO SAPIENS	ENDOCHONDRAL OSSIFICATION WITH SKELETAL DYSPLASIAS%WIKIPATHWAYS_20200510%WP4808%HOMO SAPIENS		27	-0.292526	-1.0578	0.414871	0.800965	1	1125	tags=44%, list=36%, signal=69%
EMBRYONIC ORGAN MORPHOGENESIS%GOBP%GO:0048562	EMBRYONIC ORGAN MORPHOGENESIS%GOBP%GO:0048562		24	-0.29528	-1.0574	0.418502	0.801181	1	1104	tags=46%, list=35%, signal=70%
POSITIVE REGULATION OF MULTI-ORGANISM PROCESS%GOBP%GO:0043902	POSITIVE REGULATION OF MULTI-ORGANISM PROCESS%GOBP%GO:0043902		27	-0.289869	-1.05726	0.394535	0.800578	1	316	tags=22%, list=10%, signal=25%
PROTEIN FOLDING%REACTOME%R-HSA-391251.1	PROTEIN FOLDING%REACTOME%R-HSA-391251.1		15	-0.329992	-1.0567	0.4	0.801262	1	1399	tags=67%, list=45%, signal=120%
SUDDEN INFANT DEATH SYNDROME (SIDS) SUSCEPTIBILITY PATHWAYS%WIKIPATHWAYS_20200510%WP706%HOMO SAPIENS	SUDDEN INFANT DEATH SYNDROME (SIDS) SUSCEPTIBILITY PATHWAYS%WIKIPATHWAYS_20200510%WP706%HOMO SAPIENS		28	-0.287504	-1.05658	0.403209	0.800628	1	1629	tags=71%, list=52%, signal=148%
POSITIVE REGULATION OF ORGANELLE ORGANIZATION%GOBP%GO:0010638	POSITIVE REGULATION OF ORGANELLE ORGANIZATION%GOBP%GO:0010638		88	-0.238911	-1.05531	0.40546	0.803447	1	560	tags=23%, list=18%, signal=27%
REGULATION OF INSULIN SECRETION%GOBP%GO:0050796	REGULATION OF INSULIN SECRETION%GOBP%GO:0050796		22	-0.305544	-1.05529	0.423163	0.802489	1	1001	tags=45%, list=32%, signal=66%
RESPONSE TO DRUG%GOBP%GO:0042493	RESPONSE TO DRUG%GOBP%GO:0042493		84	-0.238178	-1.05484	0.41776	0.80279	1	1472	tags=50%, list=47%, signal=92%
RESPONSE TO BMP%GOBP%GO:0071772	RESPONSE TO BMP%GOBP%GO:0071772		19	-0.314474	-1.05445	0.433143	0.802876	1	1204	tags=47%, list=39%, signal=77%
POSITIVE REGULATION OF MITOTIC CELL CYCLE%GOBP%GO:0045931	POSITIVE REGULATION OF MITOTIC CELL CYCLE%GOBP%GO:0045931		32	-0.27558	-1.05427	0.42476	0.802402	1	389	tags=19%, list=12%, signal=21%
CELL MIGRATION%GOBP%GO:0016477	CELL MIGRATION%GOBP%GO:0016477		207	-0.221794	-1.05398	0.374	0.802329	1	1542	tags=56%, list=49%, signal=103%
REGULATION OF INSULIN SECRETION%REACTOME%R-HSA-422356.3	REGULATION OF INSULIN SECRETION%REACTOME%R-HSA-422356.3		26	-0.288215	-1.05395	0.396495	0.801442	1	2007	tags=88%, list=64%, signal=246%
REGULATION OF PROTEIN LOCALIZATION%GOBP%GO:0032880	REGULATION OF PROTEIN LOCALIZATION%GOBP%GO:0032880		140	-0.225837	-1.05243	0.389389	0.804952	1	1042	tags=37%, list=33%, signal=53%
C-MYB TRANSCRIPTION FACTOR NETWORK%PATHWAY INTERACTION DATABASE NCI-NATURE CURATED DATA%C-MYB TRANSCRIPTION FACTOR NETWORK	C-MYB TRANSCRIPTION FACTOR NETWORK%PATHWAY INTERACTION DATABASE NCI-NATURE CURATED DATA%C-MYB TRANSCRIPTION FACTOR NETWORK		17	-0.323642	-1.05156	0.403263	0.806563	1	991	tags=41%, list=32%, signal=60%
POSITIVE REGULATION OF CELL GROWTH%GOBP%GO:0030307	POSITIVE REGULATION OF CELL GROWTH%GOBP%GO:0030307		16	-0.326375	-1.05105	0.410345	0.807021	1	1092	tags=50%, list=35%, signal=77%
RESPONSE TO TOXIC SUBSTANCE%GOBP%GO:0009636	RESPONSE TO TOXIC SUBSTANCE%GOBP%GO:0009636		36	-0.271465	-1.0509	0.434002	0.806509	1	580	tags=25%, list=19%, signal=30%
REGULATION OF CARBOHYDRATE METABOLIC PROCESS%GOBP%GO:0006109	REGULATION OF CARBOHYDRATE METABOLIC PROCESS%GOBP%GO:0006109		18	-0.313962	-1.0508	0.392	0.805838	1	1406	tags=56%, list=45%, signal=101%
RESPONSE TO EXTERNAL BIOTIC STIMULUS%GOBP%GO:0043207	RESPONSE TO EXTERNAL BIOTIC STIMULUS%GOBP%GO:0043207		119	-0.230304	-1.0508	0.41324	0.804868	1	977	tags=39%, list=31%, signal=55%
POSITIVE REGULATION OF CELLULAR COMPONENT MOVEMENT%GOBP%GO:0051272	POSITIVE REGULATION OF CELLULAR COMPONENT MOVEMENT%GOBP%GO:0051272		121	-0.22949	-1.0502	0.407407	0.805655	1	1310	tags=46%, list=42%, signal=77%
5HT2 TYPE RECEPTOR MEDIATED SIGNALING PATHWAY%PANTHER PATHWAY%P04374	5HT2 TYPE RECEPTOR MEDIATED SIGNALING PATHWAY%PANTHER PATHWAY%P04374		15	-0.338661	-1.05005	0.417453	0.805093	1	1984	tags=93%, list=64%, signal=256%
PHOSPHOLIPID BIOSYNTHETIC PROCESS%GOBP%GO:0008654	PHOSPHOLIPID BIOSYNTHETIC PROCESS%GOBP%GO:0008654		19	-0.3167	-1.04826	0.418391	0.80939	1	567	tags=26%, list=18%, signal=32%
POSITIVE REGULATION OF CYTOKINE PRODUCTION%GOBP%GO:0001819	POSITIVE REGULATION OF CYTOKINE PRODUCTION%GOBP%GO:0001819		73	-0.24184	-1.04814	0.429719	0.808778	1	1259	tags=45%, list=40%, signal=74%
VASCULAR PROCESS IN CIRCULATORY SYSTEM%GOBP%GO:0003018	VASCULAR PROCESS IN CIRCULATORY SYSTEM%GOBP%GO:0003018		33	-0.275432	-1.04758	0.429787	0.809466	1	1493	tags=67%, list=48%, signal=127%
AXON ENSHEATHMENT%GOBP%GO:0008366	AXON ENSHEATHMENT%GOBP%GO:0008366		15	-0.339312	-1.04733	0.432558	0.809218	1	491	tags=27%, list=16%, signal=32%
NEGATIVE REGULATION OF T CELL ACTIVATION%GOBP%GO:0050868	NEGATIVE REGULATION OF T CELL ACTIVATION%GOBP%GO:0050868		15	-0.331451	-1.04725	0.411204	0.808428	1	1672	tags=73%, list=54%, signal=157%
REGULATION OF CELL PROLIFERATION%GOBP%GO:0042127	REGULATION OF CELL PROLIFERATION%GOBP%GO:0042127		300	-0.215809	-1.04708	0.346	0.807929	1	1142	tags=39%, list=37%, signal=55%
BCR%NETPATH%BCR	BCR%NETPATH%BCR		25	-0.29448	-1.04642	0.427003	0.808882	1	2044	tags=88%, list=66%, signal=254%
RESPONSE TO BIOTIC STIMULUS%GOBP%GO:0009607	RESPONSE TO BIOTIC STIMULUS%GOBP%GO:0009607		121	-0.227066	-1.04576	0.416667	0.809837	1	977	tags=39%, list=31%, signal=54%
CLASS I MHC MEDIATED ANTIGEN PROCESSING & PRESENTATION%REACTOME%R-HSA-983169.3	CLASS I MHC MEDIATED ANTIGEN PROCESSING & PRESENTATION%REACTOME%R-HSA-983169.3		31	-0.280691	-1.04503	0.433544	0.811009	1	370	tags=19%, list=12%, signal=22%
POSITIVE REGULATION OF CELL MOTILITY%GOBP%GO:2000147	POSITIVE REGULATION OF CELL MOTILITY%GOBP%GO:2000147		121	-0.22949	-1.04428	0.414243	0.812231	1	1310	tags=46%, list=42%, signal=77%
G PROTEIN SIGNALING PATHWAYS%WIKIPATHWAYS_20200510%WP35%HOMO SAPIENS	G PROTEIN SIGNALING PATHWAYS%WIKIPATHWAYS_20200510%WP35%HOMO SAPIENS		25	-0.297147	-1.04372	0.441111	0.812905	1	1710	tags=72%, list=55%, signal=158%
CHAPERONIN-MEDIATED PROTEIN FOLDING%REACTOME%R-HSA-390466.3	CHAPERONIN-MEDIATED PROTEIN FOLDING%REACTOME%R-HSA-390466.3		15	-0.329992	-1.04363	0.412865	0.812222	1	1399	tags=67%, list=45%, signal=120%
SYNAPTIC VESICLE CYCLE%GOBP%GO:0099504	SYNAPTIC VESICLE CYCLE%GOBP%GO:0099504		19	-0.309088	-1.04298	0.430034	0.813064	1	878	tags=42%, list=28%, signal=58%
NEGATIVE REGULATION OF INTRACELLULAR SIGNAL TRANSDUCTION%GOBP%GO:1902532	NEGATIVE REGULATION OF INTRACELLULAR SIGNAL TRANSDUCTION%GOBP%GO:1902532		74	-0.23741	-1.04048	0.440609	0.819428	1	728	tags=26%, list=23%, signal=33%
CARBOHYDRATE METABOLIC PROCESS%GOBP%GO:0005975	CARBOHYDRATE METABOLIC PROCESS%GOBP%GO:0005975		43	-0.259179	-1.04003	0.423604	0.819816	1	1077	tags=37%, list=35%, signal=56%
REGULATION OF PROTEIN LOCALIZATION TO PLASMA MEMBRANE%GOBP%GO:1903076	REGULATION OF PROTEIN LOCALIZATION TO PLASMA MEMBRANE%GOBP%GO:1903076		15	-0.328337	-1.03997	0.426994	0.818988	1	920	tags=40%, list=30%, signal=56%
REGULATION OF NEUROGENESIS%GOBP%GO:0050767	REGULATION OF NEUROGENESIS%GOBP%GO:0050767		117	-0.225812	-1.03981	0.436181	0.818506	1	1331	tags=46%, list=43%, signal=78%
POSITIVE REGULATION OF NEURON DEATH%GOBP%GO:1901216	POSITIVE REGULATION OF NEURON DEATH%GOBP%GO:1901216		15	-0.325354	-1.03969	0.432084	0.817858	1	256	tags=20%, list=8%, signal=22%
POSITIVE REGULATION OF PROTEIN KINASE B SIGNALING%GOBP%GO:0051897	POSITIVE REGULATION OF PROTEIN KINASE B SIGNALING%GOBP%GO:0051897		42	-0.26138	-1.0391	0.425598	0.818576	1	560	tags=29%, list=18%, signal=34%
NEGATIVE REGULATION OF PROTEIN TRANSPORT%GOBP%GO:0051224	NEGATIVE REGULATION OF PROTEIN TRANSPORT%GOBP%GO:0051224		29	-0.274391	-1.03841	0.445513	0.819588	1	1160	tags=45%, list=37%, signal=71%
POSITIVE REGULATION OF GENE EXPRESSION%GOBP%GO:0010628	POSITIVE REGULATION OF GENE EXPRESSION%GOBP%GO:0010628		253	-0.212042	-1.03679	0.393	0.823392	1	1309	tags=43%, list=42%, signal=68%
ANTIGEN PROCESSING: UBIQUITINATION & PROTEASOME DEGRADATION%REACTOME DATABASE ID RELEASE 72%983168	ANTIGEN PROCESSING: UBIQUITINATION & PROTEASOME DEGRADATION%REACTOME DATABASE ID RELEASE 72%983168		16	-0.326354	-1.03669	0.434732	0.822705	1	336	tags=19%, list=11%, signal=21%
PID_CMYB_PATHWAY%MSIGDB_C2%PID_CMYB_PATHWAY	PID_CMYB_PATHWAY%MSIGDB_C2%PID_CMYB_PATHWAY		17	-0.323641	-1.03614	0.435239	0.823345	1	991	tags=41%, list=32%, signal=60%
T CELL ACTIVATION INVOLVED IN IMMUNE RESPONSE%GOBP%GO:0002286	T CELL ACTIVATION INVOLVED IN IMMUNE RESPONSE%GOBP%GO:0002286		15	-0.32872	-1.03609	0.425206	0.822525	1	1233	tags=60%, list=40%, signal=99%
CELL JUNCTION ORGANIZATION%GOBP%GO:0034330	CELL JUNCTION ORGANIZATION%GOBP%GO:0034330		61	-0.24297	-1.03455	0.449692	0.825976	1	617	tags=26%, list=20%, signal=32%
LEUKOCYTE MEDIATED IMMUNITY%GOBP%GO:0002443	LEUKOCYTE MEDIATED IMMUNITY%GOBP%GO:0002443		155	-0.221412	-1.03407	0.431294	0.826408	1	960	tags=34%, list=31%, signal=46%
RESPONSE TO CYTOKINE%GOBP%GO:0034097	RESPONSE TO CYTOKINE%GOBP%GO:0034097		170	-0.217088	-1.03312	0.443	0.828341	1	1336	tags=46%, list=43%, signal=76%
DEFENSE RESPONSE TO OTHER ORGANISM%GOBP%GO:0098542	DEFENSE RESPONSE TO OTHER ORGANISM%GOBP%GO:0098542		67	-0.237106	-1.03283	0.443992	0.828174	1	860	tags=37%, list=28%, signal=50%
REGULATION OF RECEPTOR-MEDIATED ENDOCYTOSIS%GOBP%GO:0048259	REGULATION OF RECEPTOR-MEDIATED ENDOCYTOSIS%GOBP%GO:0048259		19	-0.308924	-1.03242	0.439955	0.828466	1	388	tags=26%, list=12%, signal=30%
REGULATION OF HORMONE LEVELS%GOBP%GO:0010817	REGULATION OF HORMONE LEVELS%GOBP%GO:0010817		81	-0.232156	-1.03232	0.443434	0.827778	1	1308	tags=49%, list=42%, signal=83%
POSITIVE REGULATION OF LEUKOCYTE MEDIATED IMMUNITY%GOBP%GO:0002705	POSITIVE REGULATION OF LEUKOCYTE MEDIATED IMMUNITY%GOBP%GO:0002705		21	-0.300982	-1.02969	0.435466	0.834429	1	1319	tags=57%, list=42%, signal=98%
NEGATIVE REGULATION OF DNA-BINDING TRANSCRIPTION FACTOR ACTIVITY%GOBP%GO:0043433	NEGATIVE REGULATION OF DNA-BINDING TRANSCRIPTION FACTOR ACTIVITY%GOBP%GO:0043433		28	-0.276331	-1.02923	0.456405	0.834835	1	1654	tags=61%, list=53%, signal=128%
REGULATION OF PHOSPHOLIPASE ACTIVITY%GOBP%GO:0010517	REGULATION OF PHOSPHOLIPASE ACTIVITY%GOBP%GO:0010517		27	-0.282951	-1.0286	0.451542	0.835657	1	1778	tags=74%, list=57%, signal=171%
NEGATIVE REGULATION OF CYTOSKELETON ORGANIZATION%GOBP%GO:0051494	NEGATIVE REGULATION OF CYTOSKELETON ORGANIZATION%GOBP%GO:0051494		20	-0.300512	-1.02762	0.42809	0.837492	1	350	tags=20%, list=11%, signal=22%
NEGATIVE REGULATION OF ESTABLISHMENT OF PROTEIN LOCALIZATION%GOBP%GO:1904950	NEGATIVE REGULATION OF ESTABLISHMENT OF PROTEIN LOCALIZATION%GOBP%GO:1904950		29	-0.274391	-1.02557	0.469256	0.842447	1	1160	tags=45%, list=37%, signal=71%
TISSUE HOMEOSTASIS%GOBP%GO:0001894	TISSUE HOMEOSTASIS%GOBP%GO:0001894		20	-0.299351	-1.02521	0.450056	0.842479	1	1499	tags=65%, list=48%, signal=124%
NEGATIVE REGULATION OF PROTEIN SECRETION%GOBP%GO:0050709	NEGATIVE REGULATION OF PROTEIN SECRETION%GOBP%GO:0050709		23	-0.287486	-1.02498	0.45186	0.842181	1	1042	tags=43%, list=33%, signal=65%
NEGATIVE REGULATION OF PEPTIDE SECRETION%GOBP%GO:0002792	NEGATIVE REGULATION OF PEPTIDE SECRETION%GOBP%GO:0002792		25	-0.290267	-1.02397	0.446352	0.844143	1	1042	tags=44%, list=33%, signal=66%
POSITIVE REGULATION OF LOCOMOTION%GOBP%GO:0040017	POSITIVE REGULATION OF LOCOMOTION%GOBP%GO:0040017		124	-0.222367	-1.02271	0.464859	0.846806	1	1493	tags=52%, list=48%, signal=97%
POSITIVE REGULATION OF CELL COMMUNICATION%GOBP%GO:0010647	POSITIVE REGULATION OF CELL COMMUNICATION%GOBP%GO:0010647		296	-0.209862	-1.0222	0.437	0.847314	1	1328	tags=45%, list=43%, signal=71%
GLYCEROLIPID BIOSYNTHETIC PROCESS%GOBP%GO:0045017	GLYCEROLIPID BIOSYNTHETIC PROCESS%GOBP%GO:0045017		20	-0.298122	-1.02216	0.461017	0.846421	1	567	tags=25%, list=18%, signal=30%
REGULATION OF COLD-INDUCED THERMOGENESIS%GOBP%GO:0120161	REGULATION OF COLD-INDUCED THERMOGENESIS%GOBP%GO:0120161		29	-0.276224	-1.02201	0.455032	0.845857	1	1599	tags=62%, list=51%, signal=126%
MHC CLASS II ANTIGEN PRESENTATION%REACTOME%R-HSA-2132295.3	MHC CLASS II ANTIGEN PRESENTATION%REACTOME%R-HSA-2132295.3		22	-0.291228	-1.02097	0.466741	0.847959	1	586	tags=27%, list=19%, signal=33%
REGULATION OF CELL KILLING%GOBP%GO:0031341	REGULATION OF CELL KILLING%GOBP%GO:0031341		22	-0.29444	-1.02081	0.464602	0.847445	1	1035	tags=50%, list=33%, signal=74%
REGULATION OF PROTEIN STABILITY%GOBP%GO:0031647	REGULATION OF PROTEIN STABILITY%GOBP%GO:0031647		29	-0.278973	-1.02074	0.460109	0.846652	1	1440	tags=52%, list=46%, signal=95%
CELL PROJECTION ORGANIZATION%GOBP%GO:0030030	CELL PROJECTION ORGANIZATION%GOBP%GO:0030030		161	-0.21659	-1.01968	0.45	0.848684	1	1662	tags=56%, list=53%, signal=114%
EXTRACELLULAR MATRIX ORGANIZATION%REACTOME%R-HSA-1474244.2	EXTRACELLULAR MATRIX ORGANIZATION%REACTOME%R-HSA-1474244.2		131	-0.221596	-1.01898	0.467402	0.849705	1	1465	tags=53%, list=47%, signal=97%
PID_TXA2PATHWAY%MSIGDB_C2%PID_TXA2PATHWAY	PID_TXA2PATHWAY%MSIGDB_C2%PID_TXA2PATHWAY		22	-0.294739	-1.01889	0.459309	0.849002	1	1646	tags=68%, list=53%, signal=143%
PLASMA MEMBRANE BOUNDED CELL PROJECTION ORGANIZATION%GOBP%GO:0120036	PLASMA MEMBRANE BOUNDED CELL PROJECTION ORGANIZATION%GOBP%GO:0120036		157	-0.215777	-1.01693	0.465	0.853703	1	1662	tags=56%, list=53%, signal=114%
POSITIVE REGULATION OF SIGNALING%GOBP%GO:0023056	POSITIVE REGULATION OF SIGNALING%GOBP%GO:0023056		298	-0.207324	-1.01688	0.447	0.852855	1	1328	tags=45%, list=43%, signal=70%
REGULATION OF RAS PROTEIN SIGNAL TRANSDUCTION%GOBP%GO:0046578	REGULATION OF RAS PROTEIN SIGNAL TRANSDUCTION%GOBP%GO:0046578		29	-0.277545	-1.0159	0.465591	0.854651	1	625	tags=28%, list=20%, signal=34%
CARDIOVASCULAR SYSTEM DEVELOPMENT%GOBP%GO:0072358	CARDIOVASCULAR SYSTEM DEVELOPMENT%GOBP%GO:0072358		95	-0.22303	-1.01455	0.481928	0.857588	1	1501	tags=54%, list=48%, signal=100%
NEGATIVE REGULATION OF SUPRAMOLECULAR FIBER ORGANIZATION%GOBP%GO:1902904	NEGATIVE REGULATION OF SUPRAMOLECULAR FIBER ORGANIZATION%GOBP%GO:1902904		21	-0.292227	-1.01444	0.479638	0.856893	1	350	tags=19%, list=11%, signal=21%
VASCULAR ENDOTHELIAL GROWTH FACTOR RECEPTOR SIGNALING PATHWAY%GOBP%GO:0048010	VASCULAR ENDOTHELIAL GROWTH FACTOR RECEPTOR SIGNALING PATHWAY%GOBP%GO:0048010		17	-0.308202	-1.01204	0.448237	0.862684	1	1515	tags=59%, list=49%, signal=114%
HALLMARK_APICAL_JUNCTION%MSIGDB_C2%HALLMARK_APICAL_JUNCTION	HALLMARK_APICAL_JUNCTION%MSIGDB_C2%HALLMARK_APICAL_JUNCTION		65	-0.234014	-1.01181	0.47906	0.862376	1	657	tags=25%, list=21%, signal=31%
INTEGRIN SIGNALLING PATHWAY%PANTHER PATHWAY%P00034	INTEGRIN SIGNALLING PATHWAY%PANTHER PATHWAY%P00034		55	-0.240033	-1.01031	0.488205	0.865685	1	1878	tags=71%, list=60%, signal=175%
CELLULAR RESPONSE TO PEPTIDE%GOBP%GO:1901653	CELLULAR RESPONSE TO PEPTIDE%GOBP%GO:1901653		43	-0.253111	-1.01013	0.476891	0.865203	1	1858	tags=72%, list=60%, signal=176%
POSITIVE REGULATION OF CELLULAR COMPONENT BIOGENESIS%GOBP%GO:0044089	POSITIVE REGULATION OF CELLULAR COMPONENT BIOGENESIS%GOBP%GO:0044089		84	-0.230641	-1.01003	0.484264	0.864537	1	845	tags=31%, list=27%, signal=41%
REGULATED EXOCYTOSIS%GOBP%GO:0045055	REGULATED EXOCYTOSIS%GOBP%GO:0045055		175	-0.215068	-1.00957	0.469469	0.864895	1	960	tags=34%, list=31%, signal=46%
POSITIVE REGULATION OF MACROMOLECULE BIOSYNTHETIC PROCESS%GOBP%GO:0010557	POSITIVE REGULATION OF MACROMOLECULE BIOSYNTHETIC PROCESS%GOBP%GO:0010557		219	-0.21025	-1.0095	0.463	0.864092	1	1309	tags=42%, list=42%, signal=68%
KITRECEPTOR%NETPATH%KITRECEPTOR	KITRECEPTOR%NETPATH%KITRECEPTOR		19	-0.294803	-1.00925	0.453725	0.863812	1	1973	tags=84%, list=63%, signal=228%
REGULATION OF REACTIVE OXYGEN SPECIES METABOLIC PROCESS%GOBP%GO:2000377	REGULATION OF REACTIVE OXYGEN SPECIES METABOLIC PROCESS%GOBP%GO:2000377		32	-0.266579	-1.00916	0.475584	0.863053	1	65	tags=13%, list=2%, signal=13%
VASCULATURE DEVELOPMENT%GOBP%GO:0001944	VASCULATURE DEVELOPMENT%GOBP%GO:0001944		95	-0.22303	-1.00836	0.478873	0.864274	1	1501	tags=54%, list=48%, signal=100%
NABA_BASEMENT_MEMBRANES%MSIGDB_C2%NABA_BASEMENT_MEMBRANES	NABA_BASEMENT_MEMBRANES%MSIGDB_C2%NABA_BASEMENT_MEMBRANES		15	-0.318317	-1.00816	0.459364	0.863851	1	1519	tags=67%, list=49%, signal=129%
CYTOSKELETON ORGANIZATION%GOBP%GO:0007010	CYTOSKELETON ORGANIZATION%GOBP%GO:0007010		194	-0.212241	-1.00797	0.473	0.863381	1	587	tags=20%, list=19%, signal=23%
CELLULAR RESPONSE TO CYTOKINE STIMULUS%GOBP%GO:0071345	CELLULAR RESPONSE TO CYTOKINE STIMULUS%GOBP%GO:0071345		157	-0.213197	-1.0076	0.509509	0.863497	1	1336	tags=46%, list=43%, signal=76%
BLOOD VESSEL DEVELOPMENT%GOBP%GO:0001568	BLOOD VESSEL DEVELOPMENT%GOBP%GO:0001568		92	-0.225393	-1.00684	0.513568	0.864678	1	1501	tags=54%, list=48%, signal=102%
ALCOHOL BIOSYNTHETIC PROCESS%GOBP%GO:0046165	ALCOHOL BIOSYNTHETIC PROCESS%GOBP%GO:0046165		23	-0.28347	-1.00627	0.502762	0.865354	1	488	tags=22%, list=16%, signal=26%
COLLAGEN BIOSYNTHESIS AND MODIFYING ENZYMES%REACTOME%R-HSA-1650814.3	COLLAGEN BIOSYNTHESIS AND MODIFYING ENZYMES%REACTOME%R-HSA-1650814.3		35	-0.26528	-1.006	0.480171	0.865157	1	1465	tags=57%, list=47%, signal=107%
REGULATION OF PHOSPHATIDYLINOSITOL 3-KINASE SIGNALING%GOBP%GO:0014066	REGULATION OF PHOSPHATIDYLINOSITOL 3-KINASE SIGNALING%GOBP%GO:0014066		34	-0.2613	-1.00442	0.484624	0.868558	1	1530	tags=62%, list=49%, signal=120%
ANIMAL ORGAN DEVELOPMENT%GOBP%GO:0048513	ANIMAL ORGAN DEVELOPMENT%GOBP%GO:0048513		458	-0.202073	-1.00374	0.497	0.86949	1	1384	tags=47%, list=44%, signal=73%
MACROMOLECULE CATABOLIC PROCESS%GOBP%GO:0009057	MACROMOLECULE CATABOLIC PROCESS%GOBP%GO:0009057		78	-0.229575	-1.00325	0.474594	0.86992	1	212	tags=13%, list=7%, signal=13%
REGULATION OF PEPTIDYL-TYROSINE PHOSPHORYLATION%GOBP%GO:0050730	REGULATION OF PEPTIDYL-TYROSINE PHOSPHORYLATION%GOBP%GO:0050730		51	-0.241551	-1.00318	0.49325	0.869152	1	1319	tags=49%, list=42%, signal=84%
RESPONSE TO ORGANIC SUBSTANCE%GOBP%GO:0010033	RESPONSE TO ORGANIC SUBSTANCE%GOBP%GO:0010033		402	-0.204059	-1.00239	0.51	0.870371	1	1493	tags=49%, list=48%, signal=82%
LEUKOCYTE ACTIVATION%GOBP%GO:0045321	LEUKOCYTE ACTIVATION%GOBP%GO:0045321		204	-0.210759	-1.00114	0.487	0.872758	1	1109	tags=38%, list=36%, signal=55%
REGULATION OF HYDROLASE ACTIVITY%GOBP%GO:0051336	REGULATION OF HYDROLASE ACTIVITY%GOBP%GO:0051336		168	-0.213262	-1.00112	0.49049	0.871821	1	823	tags=28%, list=26%, signal=36%
REGULATION OF NEURON DIFFERENTIATION%GOBP%GO:0045664	REGULATION OF NEURON DIFFERENTIATION%GOBP%GO:0045664		91	-0.226244	-1.0004	0.513568	0.872835	1	1331	tags=46%, list=43%, signal=78%
ELASTIC FIBRE FORMATION%REACTOME DATABASE ID RELEASE 72%1566948	ELASTIC FIBRE FORMATION%REACTOME DATABASE ID RELEASE 72%1566948		17	-0.309557	-1.00015	0.463615	0.872544	1	1767	tags=76%, list=57%, signal=176%
REGULATION OF GTPASE ACTIVITY%GOBP%GO:0043087	REGULATION OF GTPASE ACTIVITY%GOBP%GO:0043087		52	-0.239999	-1.00003	0.482937	0.87191	1	983	tags=33%, list=32%, signal=47%
POSITIVE REGULATION OF CELL PROLIFERATION%GOBP%GO:0008284	POSITIVE REGULATION OF CELL PROLIFERATION%GOBP%GO:0008284		165	-0.210912	-0.999154	0.506012	0.873309	1	1140	tags=39%, list=37%, signal=59%
PATHWAYS REGULATING HIPPO SIGNALING%WIKIPATHWAYS_20200510%WP4540%HOMO SAPIENS	PATHWAYS REGULATING HIPPO SIGNALING%WIKIPATHWAYS_20200510%WP4540%HOMO SAPIENS		33	-0.259918	-0.997057	0.485654	0.878142	1	2020	tags=82%, list=65%, signal=230%
NABA_ECM_AFFILIATED%MSIGDB_C2%NABA_ECM_AFFILIATED	NABA_ECM_AFFILIATED%MSIGDB_C2%NABA_ECM_AFFILIATED		51	-0.240996	-0.996274	0.489209	0.879395	1	1087	tags=41%, list=35%, signal=62%
POSITIVE REGULATION OF BIOSYNTHETIC PROCESS%GOBP%GO:0009891	POSITIVE REGULATION OF BIOSYNTHETIC PROCESS%GOBP%GO:0009891		237	-0.205608	-0.995104	0.514514	0.881633	1	1309	tags=42%, list=42%, signal=67%
TUBE DEVELOPMENT%GOBP%GO:0035295	TUBE DEVELOPMENT%GOBP%GO:0035295		122	-0.215238	-0.995076	0.510553	0.880732	1	1828	tags=67%, list=59%, signal=156%
NEGATIVE REGULATION OF CELL DIFFERENTIATION%GOBP%GO:0045596	NEGATIVE REGULATION OF CELL DIFFERENTIATION%GOBP%GO:0045596		90	-0.223269	-0.993973	0.495976	0.882788	1	1288	tags=44%, list=41%, signal=74%
BMP SIGNALING PATHWAY%GOBP%GO:0030509	BMP SIGNALING PATHWAY%GOBP%GO:0030509		17	-0.300753	-0.993331	0.494675	0.88354	1	1204	tags=47%, list=39%, signal=76%
OXOACID METABOLIC PROCESS%GOBP%GO:0043436	OXOACID METABOLIC PROCESS%GOBP%GO:0043436		136	-0.213347	-0.993228	0.509509	0.882825	1	497	tags=19%, list=16%, signal=22%
NEGATIVE REGULATION OF CELL GROWTH%GOBP%GO:0030308	NEGATIVE REGULATION OF CELL GROWTH%GOBP%GO:0030308		38	-0.251083	-0.992605	0.497904	0.883588	1	1422	tags=47%, list=46%, signal=86%
INTEGRIN-MEDIATED SIGNALING PATHWAY%GOBP%GO:0007229	INTEGRIN-MEDIATED SIGNALING PATHWAY%GOBP%GO:0007229		25	-0.273241	-0.991101	0.490791	0.886962	1	2017	tags=84%, list=65%, signal=236%
RESPONSE TO KETONE%GOBP%GO:1901654	RESPONSE TO KETONE%GOBP%GO:1901654		22	-0.28665	-0.990932	0.5	0.88643	1	1828	tags=73%, list=59%, signal=175%
IMMUNE SYSTEM%REACTOME%R-HSA-168256.7	IMMUNE SYSTEM%REACTOME%R-HSA-168256.7		399	-0.200179	-0.990677	0.536	0.886194	1	657	tags=24%, list=21%, signal=27%
OXIDOREDUCTION COENZYME METABOLIC PROCESS%GOBP%GO:0006733	OXIDOREDUCTION COENZYME METABOLIC PROCESS%GOBP%GO:0006733		17	-0.299676	-0.989344	0.494761	0.888902	1	1140	tags=41%, list=37%, signal=65%
REGULATION OF BLOOD VESSEL DIAMETER%GOBP%GO:0097746	REGULATION OF BLOOD VESSEL DIAMETER%GOBP%GO:0097746		22	-0.282025	-0.989297	0.493714	0.88806	1	995	tags=50%, list=32%, signal=73%
DISEASES ASSOCIATED WITH O-GLYCOSYLATION OF PROTEINS%REACTOME%R-HSA-3906995.2	DISEASES ASSOCIATED WITH O-GLYCOSYLATION OF PROTEINS%REACTOME%R-HSA-3906995.2		20	-0.295694	-0.988597	0.50838	0.888945	1	1347	tags=55%, list=43%, signal=96%
REGULATION OF TUBE DIAMETER%GOBP%GO:0035296	REGULATION OF TUBE DIAMETER%GOBP%GO:0035296		22	-0.282025	-0.988439	0.502222	0.888402	1	995	tags=50%, list=32%, signal=73%
INTEGRATION OF ENERGY METABOLISM%REACTOME DATABASE ID RELEASE 72%163685	INTEGRATION OF ENERGY METABOLISM%REACTOME DATABASE ID RELEASE 72%163685		31	-0.263686	-0.988209	0.498932	0.888044	1	2007	tags=84%, list=64%, signal=233%
ORGANIC ACID TRANSPORT%GOBP%GO:0015849	ORGANIC ACID TRANSPORT%GOBP%GO:0015849		41	-0.246542	-0.987965	0.518789	0.887732	1	989	tags=37%, list=32%, signal=53%
CYTOKINE-MEDIATED SIGNALING PATHWAY%GOBP%GO:0019221	CYTOKINE-MEDIATED SIGNALING PATHWAY%GOBP%GO:0019221		128	-0.21259	-0.987877	0.504008	0.886983	1	1336	tags=46%, list=43%, signal=77%
NEGATIVE REGULATION OF DEVELOPMENTAL GROWTH%GOBP%GO:0048640	NEGATIVE REGULATION OF DEVELOPMENTAL GROWTH%GOBP%GO:0048640		15	-0.316956	-0.987464	0.496479	0.887136	1	1462	tags=60%, list=47%, signal=112%
REGULATION OF TUBE SIZE%GOBP%GO:0035150	REGULATION OF TUBE SIZE%GOBP%GO:0035150		22	-0.282025	-0.986878	0.48434	0.8877	1	995	tags=50%, list=32%, signal=73%
CARBOXYLIC ACID TRANSPORT%GOBP%GO:0046942	CARBOXYLIC ACID TRANSPORT%GOBP%GO:0046942		41	-0.246542	-0.98607	0.517134	0.888835	1	989	tags=37%, list=32%, signal=53%
POSITIVE REGULATION OF CELLULAR COMPONENT ORGANIZATION%GOBP%GO:0051130	POSITIVE REGULATION OF CELLULAR COMPONENT ORGANIZATION%GOBP%GO:0051130		198	-0.206117	-0.98563	0.539	0.889059	1	1310	tags=42%, list=42%, signal=69%
REGULATION OF LIPID LOCALIZATION%GOBP%GO:1905952	REGULATION OF LIPID LOCALIZATION%GOBP%GO:1905952		26	-0.272515	-0.985383	0.506593	0.888774	1	1379	tags=54%, list=44%, signal=96%
POSITIVE REGULATION OF RESPONSE TO DNA DAMAGE STIMULUS%GOBP%GO:2001022	POSITIVE REGULATION OF RESPONSE TO DNA DAMAGE STIMULUS%GOBP%GO:2001022		15	-0.306917	-0.984463	0.497055	0.890269	1	870	tags=40%, list=28%, signal=55%
POSITIVE REGULATION OF PROTEIN LOCALIZATION TO MEMBRANE%GOBP%GO:1905477	POSITIVE REGULATION OF PROTEIN LOCALIZATION TO MEMBRANE%GOBP%GO:1905477		16	-0.303028	-0.984379	0.505787	0.889565	1	1319	tags=56%, list=42%, signal=97%
SIGNALING BY RECEPTOR TYROSINE KINASES%REACTOME DATABASE ID RELEASE 72%9006934	SIGNALING BY RECEPTOR TYROSINE KINASES%REACTOME DATABASE ID RELEASE 72%9006934		100	-0.218936	-0.981849	0.519598	0.895424	1	1542	tags=55%, list=49%, signal=105%
REGULATION OF CYTOKINE BIOSYNTHETIC PROCESS%GOBP%GO:0042035	REGULATION OF CYTOKINE BIOSYNTHETIC PROCESS%GOBP%GO:0042035		16	-0.305231	-0.981401	0.516166	0.895637	1	1326	tags=63%, list=43%, signal=108%
CENTRAL NERVOUS SYSTEM DEVELOPMENT%GOBP%GO:0007417	CENTRAL NERVOUS SYSTEM DEVELOPMENT%GOBP%GO:0007417		116	-0.212878	-0.980871	0.527583	0.896078	1	1331	tags=43%, list=43%, signal=72%
RESPONSE TO FIBROBLAST GROWTH FACTOR%GOBP%GO:0071774	RESPONSE TO FIBROBLAST GROWTH FACTOR%GOBP%GO:0071774		16	-0.305903	-0.980764	0.491841	0.895406	1	409	tags=25%, list=13%, signal=29%
REGULATION OF BLOOD VESSEL SIZE%GOBP%GO:0050880	REGULATION OF BLOOD VESSEL SIZE%GOBP%GO:0050880		22	-0.282025	-0.978833	0.502769	0.899819	1	995	tags=50%, list=32%, signal=73%
REGULATION OF AXONOGENESIS%GOBP%GO:0050770	REGULATION OF AXONOGENESIS%GOBP%GO:0050770		26	-0.269582	-0.976221	0.519252	0.905839	1	1821	tags=69%, list=58%, signal=165%
REGULATION OF OXIDOREDUCTASE ACTIVITY%GOBP%GO:0051341	REGULATION OF OXIDOREDUCTASE ACTIVITY%GOBP%GO:0051341		15	-0.311672	-0.976005	0.496503	0.905416	1	1493	tags=67%, list=48%, signal=127%
POSITIVE REGULATION OF INTRACELLULAR TRANSPORT%GOBP%GO:0032388	POSITIVE REGULATION OF INTRACELLULAR TRANSPORT%GOBP%GO:0032388		23	-0.278729	-0.975271	0.518018	0.906395	1	1319	tags=48%, list=42%, signal=82%
PYRIDINE NUCLEOTIDE METABOLIC PROCESS%GOBP%GO:0019362	PYRIDINE NUCLEOTIDE METABOLIC PROCESS%GOBP%GO:0019362		17	-0.299676	-0.97435	0.505708	0.907936	1	1140	tags=41%, list=37%, signal=65%
NEGATIVE REGULATION OF DEVELOPMENTAL PROCESS%GOBP%GO:0051093	NEGATIVE REGULATION OF DEVELOPMENTAL PROCESS%GOBP%GO:0051093		140	-0.21082	-0.974232	0.565697	0.907266	1	1561	tags=54%, list=50%, signal=102%
NICOTINAMIDE NUCLEOTIDE METABOLIC PROCESS%GOBP%GO:0046496	NICOTINAMIDE NUCLEOTIDE METABOLIC PROCESS%GOBP%GO:0046496		17	-0.299676	-0.97377	0.497143	0.907632	1	1140	tags=41%, list=37%, signal=65%
CELL ACTIVATION%GOBP%GO:0001775	CELL ACTIVATION%GOBP%GO:0001775		239	-0.201564	-0.972859	0.585586	0.909161	1	1143	tags=39%, list=37%, signal=57%
CARDIAC SEPTUM DEVELOPMENT%GOBP%GO:0003279	CARDIAC SEPTUM DEVELOPMENT%GOBP%GO:0003279		17	-0.297755	-0.972747	0.526932	0.908475	1	1447	tags=59%, list=46%, signal=109%
REGULATION OF CELL ADHESION%GOBP%GO:0030155	REGULATION OF CELL ADHESION%GOBP%GO:0030155		141	-0.210394	-0.9721	0.556	0.909179	1	1453	tags=48%, list=47%, signal=86%
NEGATIVE REGULATION OF IMMUNE EFFECTOR PROCESS%GOBP%GO:0002698	NEGATIVE REGULATION OF IMMUNE EFFECTOR PROCESS%GOBP%GO:0002698		22	-0.279644	-0.971836	0.514254	0.908959	1	1551	tags=64%, list=50%, signal=126%
CELLULAR RESPONSE TO FIBROBLAST GROWTH FACTOR STIMULUS%GOBP%GO:0044344	CELLULAR RESPONSE TO FIBROBLAST GROWTH FACTOR STIMULUS%GOBP%GO:0044344		16	-0.305903	-0.971669	0.514029	0.90844	1	409	tags=25%, list=13%, signal=29%
VALIDATED TARGETS OF C-MYC TRANSCRIPTIONAL REPRESSION%PATHWAY INTERACTION DATABASE NCI-NATURE CURATED DATA%VALIDATED TARGETS OF C-MYC TRANSCRIPTIONAL REPRESSION	VALIDATED TARGETS OF C-MYC TRANSCRIPTIONAL REPRESSION%PATHWAY INTERACTION DATABASE NCI-NATURE CURATED DATA%VALIDATED TARGETS OF C-MYC TRANSCRIPTIONAL REPRESSION		15	-0.308189	-0.970982	0.51285	0.909279	1	226	tags=20%, list=7%, signal=21%
POSITIVE REGULATION OF LIPID METABOLIC PROCESS%GOBP%GO:0045834	POSITIVE REGULATION OF LIPID METABOLIC PROCESS%GOBP%GO:0045834		29	-0.260737	-0.970881	0.519108	0.90858	1	1991	tags=79%, list=64%, signal=218%
APOPTOTIC PROCESS%GOBP%GO:0006915	APOPTOTIC PROCESS%GOBP%GO:0006915		75	-0.222009	-0.970833	0.552178	0.907746	1	530	tags=23%, list=17%, signal=27%
POSITIVE REGULATION OF PROTEIN SERINE/THREONINE KINASE ACTIVITY%GOBP%GO:0071902	POSITIVE REGULATION OF PROTEIN SERINE/THREONINE KINASE ACTIVITY%GOBP%GO:0071902		51	-0.23479	-0.970366	0.527027	0.907983	1	583	tags=24%, list=19%, signal=28%
RESPONSE TO NUTRIENT%GOBP%GO:0007584	RESPONSE TO NUTRIENT%GOBP%GO:0007584		15	-0.306012	-0.969535	0.513127	0.909134	1	213	tags=20%, list=7%, signal=21%
NUCLEOSIDE TRIPHOSPHATE METABOLIC PROCESS%GOBP%GO:0009141	NUCLEOSIDE TRIPHOSPHATE METABOLIC PROCESS%GOBP%GO:0009141		16	-0.299869	-0.96786	0.526882	0.912628	1	301	tags=19%, list=10%, signal=21%
SULFUR COMPOUND METABOLIC PROCESS%GOBP%GO:0006790	SULFUR COMPOUND METABOLIC PROCESS%GOBP%GO:0006790		49	-0.239203	-0.966927	0.548818	0.914088	1	259	tags=14%, list=8%, signal=15%
TRANSCRIPTION INITIATION FROM RNA POLYMERASE II PROMOTER%GOBP%GO:0006367	TRANSCRIPTION INITIATION FROM RNA POLYMERASE II PROMOTER%GOBP%GO:0006367		21	-0.277792	-0.966565	0.54115	0.914052	1	358	tags=19%, list=11%, signal=21%
REGULATION OF JAK-STAT CASCADE%GOBP%GO:0046425	REGULATION OF JAK-STAT CASCADE%GOBP%GO:0046425		16	-0.300785	-0.966276	0.509759	0.913803	1	1233	tags=50%, list=40%, signal=82%
NEGATIVE REGULATION OF CELL ADHESION%GOBP%GO:0007162	NEGATIVE REGULATION OF CELL ADHESION%GOBP%GO:0007162		50	-0.229921	-0.966133	0.558884	0.913215	1	1839	tags=66%, list=59%, signal=158%
INTRACELLULAR SIGNAL TRANSDUCTION%GOBP%GO:0035556	INTRACELLULAR SIGNAL TRANSDUCTION%GOBP%GO:0035556		269	-0.198951	-0.96591	0.592	0.912809	1	1127	tags=36%, list=36%, signal=52%
NEGATIVE REGULATION OF CELLULAR COMPONENT MOVEMENT%GOBP%GO:0051271	NEGATIVE REGULATION OF CELLULAR COMPONENT MOVEMENT%GOBP%GO:0051271		76	-0.223658	-0.965453	0.556117	0.913012	1	1919	tags=72%, list=62%, signal=184%
POSITIVE REGULATION OF CELLULAR BIOSYNTHETIC PROCESS%GOBP%GO:0031328	POSITIVE REGULATION OF CELLULAR BIOSYNTHETIC PROCESS%GOBP%GO:0031328		233	-0.201399	-0.965233	0.595	0.912641	1	1309	tags=41%, list=42%, signal=66%
INTEGRIN-MEDIATED CELL ADHESION%WIKIPATHWAYS_20200510%WP185%HOMO SAPIENS	INTEGRIN-MEDIATED CELL ADHESION%WIKIPATHWAYS_20200510%WP185%HOMO SAPIENS		27	-0.259642	-0.964179	0.52	0.914537	1	1319	tags=48%, list=42%, signal=83%
NEGATIVE REGULATION OF ENDOTHELIAL CELL MIGRATION%GOBP%GO:0010596	NEGATIVE REGULATION OF ENDOTHELIAL CELL MIGRATION%GOBP%GO:0010596		15	-0.306672	-0.963611	0.531469	0.915028	1	1204	tags=47%, list=39%, signal=76%
CELLULAR MODIFIED AMINO ACID METABOLIC PROCESS%GOBP%GO:0006575	CELLULAR MODIFIED AMINO ACID METABOLIC PROCESS%GOBP%GO:0006575		36	-0.249558	-0.962863	0.540169	0.91604	1	747	tags=28%, list=24%, signal=36%
REGULATION OF RESPONSE TO STRESS%GOBP%GO:0080134	REGULATION OF RESPONSE TO STRESS%GOBP%GO:0080134		241	-0.201065	-0.962035	0.575	0.917248	1	1458	tags=49%, list=47%, signal=86%
PID_MYC_REPRESS_PATHWAY%MSIGDB_C2%PID_MYC_REPRESS_PATHWAY	PID_MYC_REPRESS_PATHWAY%MSIGDB_C2%PID_MYC_REPRESS_PATHWAY		15	-0.308189	-0.961361	0.531616	0.918025	1	226	tags=20%, list=7%, signal=21%
REGULATION OF PLASMA MEMBRANE BOUNDED CELL PROJECTION ORGANIZATION%GOBP%GO:0120035	REGULATION OF PLASMA MEMBRANE BOUNDED CELL PROJECTION ORGANIZATION%GOBP%GO:0120035		101	-0.213164	-0.959472	0.571715	0.921893	1	1288	tags=43%, list=41%, signal=70%
REGULATION OF CYTOSKELETON ORGANIZATION%GOBP%GO:0051493	REGULATION OF CYTOSKELETON ORGANIZATION%GOBP%GO:0051493		98	-0.213633	-0.958876	0.593561	0.922443	1	773	tags=27%, list=25%, signal=34%
RESPONSE TO ACID CHEMICAL%GOBP%GO:0001101	RESPONSE TO ACID CHEMICAL%GOBP%GO:0001101		40	-0.241047	-0.958465	0.554968	0.922551	1	920	tags=33%, list=30%, signal=46%
REGULATION OF CELL SIZE%GOBP%GO:0008361	REGULATION OF CELL SIZE%GOBP%GO:0008361		21	-0.282623	-0.957712	0.521191	0.923498	1	1429	tags=52%, list=46%, signal=96%
REGULATION OF CELLULAR COMPONENT MOVEMENT%GOBP%GO:0051270	REGULATION OF CELLULAR COMPONENT MOVEMENT%GOBP%GO:0051270		232	-0.200051	-0.957412	0.602	0.923311	1	1493	tags=50%, list=48%, signal=89%
POSITIVE REGULATION OF PHOSPHATE METABOLIC PROCESS%GOBP%GO:0045937	POSITIVE REGULATION OF PHOSPHATE METABOLIC PROCESS%GOBP%GO:0045937		214	-0.20008	-0.957289	0.608	0.922694	1	1312	tags=44%, list=42%, signal=71%
DISEASE%REACTOME DATABASE ID RELEASE 72%1643685	DISEASE%REACTOME DATABASE ID RELEASE 72%1643685		209	-0.199242	-0.957117	0.616	0.922162	1	1417	tags=47%, list=45%, signal=81%
RESPONSE TO NUTRIENT LEVELS%GOBP%GO:0031667	RESPONSE TO NUTRIENT LEVELS%GOBP%GO:0031667		45	-0.235425	-0.956626	0.560543	0.922455	1	213	tags=13%, list=7%, signal=14%
REGULATION OF CELL MIGRATION%GOBP%GO:0030334	REGULATION OF CELL MIGRATION%GOBP%GO:0030334		198	-0.200331	-0.956491	0.596	0.921825	1	1311	tags=43%, list=42%, signal=70%
REGULATION OF MRNA METABOLIC PROCESS%GOBP%GO:1903311	REGULATION OF MRNA METABOLIC PROCESS%GOBP%GO:1903311		15	-0.303099	-0.956215	0.538818	0.921622	1	806	tags=40%, list=26%, signal=54%
RESPONSE TO PEPTIDE%GOBP%GO:1901652	RESPONSE TO PEPTIDE%GOBP%GO:1901652		50	-0.228668	-0.95536	0.554303	0.922941	1	1858	tags=68%, list=60%, signal=166%
REGULATION OF GROWTH%GOBP%GO:0040008	REGULATION OF GROWTH%GOBP%GO:0040008		89	-0.214157	-0.952748	0.602616	0.928702	1	1462	tags=48%, list=47%, signal=88%
POSITIVE REGULATION OF PHOSPHORUS METABOLIC PROCESS%GOBP%GO:0010562	POSITIVE REGULATION OF PHOSPHORUS METABOLIC PROCESS%GOBP%GO:0010562		214	-0.20008	-0.951244	0.618	0.931584	1	1312	tags=44%, list=42%, signal=71%
DNA-TEMPLATED TRANSCRIPTION, INITIATION%GOBP%GO:0006352	DNA-TEMPLATED TRANSCRIPTION, INITIATION%GOBP%GO:0006352		22	-0.269547	-0.951114	0.543938	0.930939	1	358	tags=18%, list=11%, signal=20%
TISSUE MORPHOGENESIS%GOBP%GO:0048729	TISSUE MORPHOGENESIS%GOBP%GO:0048729		97	-0.208899	-0.950241	0.600404	0.932089	1	400	tags=18%, list=13%, signal=19%
TRANSMEMBRANE RECEPTOR PROTEIN TYROSINE KINASE SIGNALING PATHWAY%GOBP%GO:0007169	TRANSMEMBRANE RECEPTOR PROTEIN TYROSINE KINASE SIGNALING PATHWAY%GOBP%GO:0007169		105	-0.207366	-0.949436	0.588945	0.933169	1	1607	tags=57%, list=52%, signal=114%
MULTI-ORGANISM REPRODUCTIVE PROCESS%GOBP%GO:0044703	MULTI-ORGANISM REPRODUCTIVE PROCESS%GOBP%GO:0044703		51	-0.230117	-0.949104	0.587866	0.93303	1	980	tags=37%, list=31%, signal=53%
DRUG TRANSPORT%GOBP%GO:0015893	DRUG TRANSPORT%GOBP%GO:0015893		19	-0.284528	-0.948833	0.547914	0.932732	1	708	tags=32%, list=23%, signal=41%
METABOLISM OF PROTEINS%REACTOME%R-HSA-392499.7	METABOLISM OF PROTEINS%REACTOME%R-HSA-392499.7		212	-0.198251	-0.948643	0.625	0.932245	1	1357	tags=43%, list=44%, signal=71%
EMBRYO DEVELOPMENT%GOBP%GO:0009790	EMBRYO DEVELOPMENT%GOBP%GO:0009790		101	-0.20799	-0.948455	0.598995	0.931739	1	1576	tags=55%, list=51%, signal=109%
ANGIOGENESIS%GOBP%GO:0001525	ANGIOGENESIS%GOBP%GO:0001525		62	-0.223523	-0.948215	0.581538	0.931378	1	1677	tags=63%, list=54%, signal=133%
NEGATIVE REGULATION OF CELL MOTILITY%GOBP%GO:2000146	NEGATIVE REGULATION OF CELL MOTILITY%GOBP%GO:2000146		68	-0.22081	-0.94752	0.58554	0.932117	1	1919	tags=72%, list=62%, signal=183%
RESPONSE TO STRESS%GOBP%GO:0006950	RESPONSE TO STRESS%GOBP%GO:0006950		464	-0.190052	-0.946444	0.685	0.933899	1	597	tags=21%, list=19%, signal=22%
ORGANIC ACID METABOLIC PROCESS%GOBP%GO:0006082	ORGANIC ACID METABOLIC PROCESS%GOBP%GO:0006082		142	-0.203818	-0.946373	0.599	0.933112	1	427	tags=17%, list=14%, signal=19%
POSITIVE REGULATION OF INTRACELLULAR SIGNAL TRANSDUCTION%GOBP%GO:1902533	POSITIVE REGULATION OF INTRACELLULAR SIGNAL TRANSDUCTION%GOBP%GO:1902533		198	-0.1986	-0.945964	0.623	0.933179	1	1383	tags=45%, list=44%, signal=77%
ESTABLISHMENT OR MAINTENANCE OF CELL POLARITY%GOBP%GO:0007163	ESTABLISHMENT OR MAINTENANCE OF CELL POLARITY%GOBP%GO:0007163		26	-0.260408	-0.945719	0.559777	0.932832	1	1142	tags=38%, list=37%, signal=60%
TOLL-LIKE RECEPTOR SIGNALING PATHWAY%WIKIPATHWAYS_20200510%WP75%HOMO SAPIENS	TOLL-LIKE RECEPTOR SIGNALING PATHWAY%WIKIPATHWAYS_20200510%WP75%HOMO SAPIENS		17	-0.287962	-0.94473	0.56682	0.934334	1	1540	tags=59%, list=49%, signal=116%
CELLULAR PROCESS INVOLVED IN REPRODUCTION IN MULTICELLULAR ORGANISM%GOBP%GO:0022412	CELLULAR PROCESS INVOLVED IN REPRODUCTION IN MULTICELLULAR ORGANISM%GOBP%GO:0022412		21	-0.273063	-0.943535	0.563818	0.936359	1	980	tags=43%, list=31%, signal=62%
POSITIVE REGULATION OF SMALL MOLECULE METABOLIC PROCESS%GOBP%GO:0062013	POSITIVE REGULATION OF SMALL MOLECULE METABOLIC PROCESS%GOBP%GO:0062013		23	-0.26489	-0.943359	0.556656	0.935853	1	933	tags=35%, list=30%, signal=49%
NEGATIVE REGULATION OF GROWTH%GOBP%GO:0045926	NEGATIVE REGULATION OF GROWTH%GOBP%GO:0045926		50	-0.229461	-0.943265	0.584631	0.935123	1	1462	tags=48%, list=47%, signal=89%
GENES CONTROLLING RENAL NEPHROGENESIS%WIKIPATHWAYS_20200510%WP4823%HOMO SAPIENS	GENES CONTROLLING RENAL NEPHROGENESIS%WIKIPATHWAYS_20200510%WP4823%HOMO SAPIENS		15	-0.291926	-0.943154	0.527381	0.934431	1	198	tags=20%, list=6%, signal=21%
SENSORY SYSTEM DEVELOPMENT%GOBP%GO:0048880	SENSORY SYSTEM DEVELOPMENT%GOBP%GO:0048880		46	-0.230459	-0.942753	0.578288	0.934501	1	1948	tags=74%, list=62%, signal=194%
NEGATIVE REGULATION OF ORGANELLE ORGANIZATION%GOBP%GO:0010639	NEGATIVE REGULATION OF ORGANELLE ORGANIZATION%GOBP%GO:0010639		39	-0.239822	-0.942663	0.562963	0.933759	1	350	tags=15%, list=11%, signal=17%
ANTIGEN PROCESSING-CROSS PRESENTATION%REACTOME%R-HSA-1236975.1	ANTIGEN PROCESSING-CROSS PRESENTATION%REACTOME%R-HSA-1236975.1		15	-0.296003	-0.942532	0.559763	0.933123	1	1009	tags=40%, list=32%, signal=59%
CELLULAR COMPONENT ASSEMBLY%GOBP%GO:0022607	CELLULAR COMPONENT ASSEMBLY%GOBP%GO:0022607		262	-0.193589	-0.94245	0.635	0.932364	1	400	tags=15%, list=13%, signal=16%
ENDOTHELINS%PATHWAY INTERACTION DATABASE NCI-NATURE CURATED DATA%ENDOTHELINS	ENDOTHELINS%PATHWAY INTERACTION DATABASE NCI-NATURE CURATED DATA%ENDOTHELINS		19	-0.276596	-0.941991	0.573348	0.932494	1	1203	tags=53%, list=39%, signal=85%
REGULATION OF PRODUCTION OF MOLECULAR MEDIATOR OF IMMUNE RESPONSE%GOBP%GO:0002700	REGULATION OF PRODUCTION OF MOLECULAR MEDIATOR OF IMMUNE RESPONSE%GOBP%GO:0002700		26	-0.260132	-0.941643	0.567686	0.932395	1	1360	tags=58%, list=44%, signal=101%
REGULATION OF ANATOMICAL STRUCTURE MORPHOGENESIS%GOBP%GO:0022603	REGULATION OF ANATOMICAL STRUCTURE MORPHOGENESIS%GOBP%GO:0022603		218	-0.196863	-0.941412	0.658	0.932017	1	1284	tags=42%, list=41%, signal=66%
CARTILAGE DEVELOPMENT%GOBP%GO:0051216	CARTILAGE DEVELOPMENT%GOBP%GO:0051216		23	-0.27172	-0.941164	0.566519	0.93171	1	1542	tags=65%, list=49%, signal=128%
HEMOSTASIS%GOBP%GO:0007599	HEMOSTASIS%GOBP%GO:0007599		63	-0.221688	-0.940854	0.604294	0.931519	1	1133	tags=40%, list=36%, signal=61%
TOLL LIKE RECEPTOR 4 (TLR4) CASCADE%REACTOME DATABASE ID RELEASE 72%166016	TOLL LIKE RECEPTOR 4 (TLR4) CASCADE%REACTOME DATABASE ID RELEASE 72%166016		19	-0.281099	-0.940101	0.577434	0.93237	1	1412	tags=53%, list=45%, signal=96%
NEGATIVE REGULATION OF NEURON DEATH%GOBP%GO:1901215	NEGATIVE REGULATION OF NEURON DEATH%GOBP%GO:1901215		27	-0.254447	-0.939681	0.567914	0.932501	1	1654	tags=63%, list=53%, signal=133%
POSITIVE REGULATION OF TRANSCRIPTION BY RNA POLYMERASE II%GOBP%GO:0045944	POSITIVE REGULATION OF TRANSCRIPTION BY RNA POLYMERASE II%GOBP%GO:0045944		151	-0.200816	-0.938817	0.637638	0.933659	1	1286	tags=40%, list=41%, signal=65%
REGULATION OF PEPTIDE HORMONE SECRETION%GOBP%GO:0090276	REGULATION OF PEPTIDE HORMONE SECRETION%GOBP%GO:0090276		28	-0.25696	-0.938507	0.56338	0.933418	1	1001	tags=46%, list=32%, signal=68%
POSITIVE REGULATION OF SIGNAL TRANSDUCTION%GOBP%GO:0009967	POSITIVE REGULATION OF SIGNAL TRANSDUCTION%GOBP%GO:0009967		281	-0.192984	-0.938023	0.657	0.933645	1	1328	tags=43%, list=43%, signal=68%
REGULATION OF PROTEIN KINASE B SIGNALING%GOBP%GO:0051896	REGULATION OF PROTEIN KINASE B SIGNALING%GOBP%GO:0051896		54	-0.225733	-0.937634	0.574512	0.933656	1	1542	tags=57%, list=49%, signal=112%
MONOCARBOXYLIC ACID TRANSPORT%GOBP%GO:0015718	MONOCARBOXYLIC ACID TRANSPORT%GOBP%GO:0015718		20	-0.273466	-0.937361	0.572406	0.933391	1	925	tags=35%, list=30%, signal=49%
KITRECEPTOR%IOB%KITRECEPTOR	KITRECEPTOR%IOB%KITRECEPTOR		17	-0.283671	-0.936926	0.570093	0.933521	1	1973	tags=82%, list=63%, signal=223%
REGULATION OF CELL ADHESION MEDIATED BY INTEGRIN%GOBP%GO:0033628	REGULATION OF CELL ADHESION MEDIATED BY INTEGRIN%GOBP%GO:0033628		18	-0.280722	-0.935	0.572241	0.937149	1	1839	tags=78%, list=59%, signal=189%
CA2+ PATHWAY%REACTOME DATABASE ID RELEASE 72%4086398	CA2+ PATHWAY%REACTOME DATABASE ID RELEASE 72%4086398		17	-0.288072	-0.934727	0.562356	0.936886	1	1453	tags=59%, list=47%, signal=110%
POSITIVE REGULATION OF MACROMOLECULE METABOLIC PROCESS%GOBP%GO:0010604	POSITIVE REGULATION OF MACROMOLECULE METABOLIC PROCESS%GOBP%GO:0010604		458	-0.18906	-0.934338	0.713	0.936901	1	1312	tags=41%, list=42%, signal=61%
FORMATION OF PRIMARY GERM LAYER%GOBP%GO:0001704	FORMATION OF PRIMARY GERM LAYER%GOBP%GO:0001704		22	-0.2662	-0.933889	0.583885	0.937066	1	1446	tags=59%, list=46%, signal=109%
REGULATION OF CELL PROJECTION ORGANIZATION%GOBP%GO:0031344	REGULATION OF CELL PROJECTION ORGANIZATION%GOBP%GO:0031344		103	-0.205444	-0.93202	0.615694	0.940594	1	1288	tags=42%, list=41%, signal=69%
REGULATION OF LYMPHOCYTE MEDIATED IMMUNITY%GOBP%GO:0002706	REGULATION OF LYMPHOCYTE MEDIATED IMMUNITY%GOBP%GO:0002706		24	-0.260557	-0.931402	0.595395	0.941196	1	957	tags=42%, list=31%, signal=60%
POSITIVE REGULATION OF MAP KINASE ACTIVITY%GOBP%GO:0043406	POSITIVE REGULATION OF MAP KINASE ACTIVITY%GOBP%GO:0043406		44	-0.231564	-0.931294	0.589583	0.940534	1	583	tags=23%, list=19%, signal=28%
NEGATIVE REGULATION OF LOCOMOTION%GOBP%GO:0040013	NEGATIVE REGULATION OF LOCOMOTION%GOBP%GO:0040013		72	-0.214253	-0.930806	0.606673	0.940738	1	1919	tags=71%, list=62%, signal=180%
NEGATIVE REGULATION OF EPITHELIAL CELL MIGRATION%GOBP%GO:0010633	NEGATIVE REGULATION OF EPITHELIAL CELL MIGRATION%GOBP%GO:0010633		16	-0.287246	-0.930479	0.57159	0.940598	1	1868	tags=75%, list=60%, signal=186%
RESPONSE TO ORGANONITROGEN COMPOUND%GOBP%GO:0010243	RESPONSE TO ORGANONITROGEN COMPOUND%GOBP%GO:0010243		99	-0.204004	-0.92973	0.632057	0.941465	1	1454	tags=46%, list=47%, signal=84%
THROMBOXANE A2 RECEPTOR SIGNALING%PATHWAY INTERACTION DATABASE NCI-NATURE CURATED DATA%THROMBOXANE A2 RECEPTOR SIGNALING	THROMBOXANE A2 RECEPTOR SIGNALING%PATHWAY INTERACTION DATABASE NCI-NATURE CURATED DATA%THROMBOXANE A2 RECEPTOR SIGNALING		20	-0.271557	-0.929384	0.566514	0.941368	1	1646	tags=65%, list=53%, signal=137%
CELLULAR COMPONENT BIOGENESIS%GOBP%GO:0044085	CELLULAR COMPONENT BIOGENESIS%GOBP%GO:0044085		265	-0.191481	-0.929037	0.673	0.941288	1	400	tags=15%, list=13%, signal=16%
PID_ENDOTHELIN_PATHWAY%MSIGDB_C2%PID_ENDOTHELIN_PATHWAY	PID_ENDOTHELIN_PATHWAY%MSIGDB_C2%PID_ENDOTHELIN_PATHWAY		19	-0.276596	-0.928389	0.575482	0.941897	1	1203	tags=53%, list=39%, signal=85%
METABOLISM OF WATER-SOLUBLE VITAMINS AND COFACTORS%REACTOME%R-HSA-196849.1	METABOLISM OF WATER-SOLUBLE VITAMINS AND COFACTORS%REACTOME%R-HSA-196849.1		19	-0.275744	-0.928314	0.582774	0.941164	1	507	tags=26%, list=16%, signal=31%
NEGATIVE REGULATION OF ANGIOGENESIS%GOBP%GO:0016525	NEGATIVE REGULATION OF ANGIOGENESIS%GOBP%GO:0016525		29	-0.251051	-0.9279	0.582618	0.941225	1	1948	tags=79%, list=62%, signal=210%
PROTEIN AUTOPHOSPHORYLATION%GOBP%GO:0046777	PROTEIN AUTOPHOSPHORYLATION%GOBP%GO:0046777		31	-0.244487	-0.927461	0.581545	0.941329	1	1530	tags=58%, list=49%, signal=113%
HALLMARK_XENOBIOTIC_METABOLISM%MSIGDB_C2%HALLMARK_XENOBIOTIC_METABOLISM	HALLMARK_XENOBIOTIC_METABOLISM%MSIGDB_C2%HALLMARK_XENOBIOTIC_METABOLISM		35	-0.24097	-0.926912	0.602139	0.941712	1	269	tags=14%, list=9%, signal=15%
NEGATIVE REGULATION OF VASCULATURE DEVELOPMENT%GOBP%GO:1901343	NEGATIVE REGULATION OF VASCULATURE DEVELOPMENT%GOBP%GO:1901343		34	-0.243117	-0.926131	0.584043	0.942636	1	1964	tags=79%, list=63%, signal=212%
POSITIVE REGULATION OF LYMPHOCYTE MEDIATED IMMUNITY%GOBP%GO:0002708	POSITIVE REGULATION OF LYMPHOCYTE MEDIATED IMMUNITY%GOBP%GO:0002708		15	-0.287972	-0.925476	0.573616	0.94329	1	1256	tags=53%, list=40%, signal=89%
NEGATIVE REGULATION OF CELL MIGRATION%GOBP%GO:0030336	NEGATIVE REGULATION OF CELL MIGRATION%GOBP%GO:0030336		65	-0.213214	-0.924165	0.6	0.945373	1	1919	tags=71%, list=62%, signal=180%
NABA_SECRETED_FACTORS%MSIGDB_C2%NABA_SECRETED_FACTORS	NABA_SECRETED_FACTORS%MSIGDB_C2%NABA_SECRETED_FACTORS		96	-0.205333	-0.9239	0.650251	0.94505	1	993	tags=38%, list=32%, signal=53%
POSITIVE REGULATION OF PEPTIDYL-TYROSINE PHOSPHORYLATION%GOBP%GO:0050731	POSITIVE REGULATION OF PEPTIDYL-TYROSINE PHOSPHORYLATION%GOBP%GO:0050731		41	-0.233248	-0.923564	0.605839	0.944923	1	1310	tags=49%, list=42%, signal=83%
POSITIVE REGULATION OF MAPK CASCADE%GOBP%GO:0043410	POSITIVE REGULATION OF MAPK CASCADE%GOBP%GO:0043410		111	-0.203637	-0.923279	0.640562	0.944668	1	1311	tags=45%, list=42%, signal=75%
NEGATIVE REGULATION OF BLOOD VESSEL MORPHOGENESIS%GOBP%GO:2000181	NEGATIVE REGULATION OF BLOOD VESSEL MORPHOGENESIS%GOBP%GO:2000181		29	-0.251051	-0.923252	0.606681	0.943815	1	1948	tags=79%, list=62%, signal=210%
RESPONSE TO INTERLEUKIN-1%GOBP%GO:0070555	RESPONSE TO INTERLEUKIN-1%GOBP%GO:0070555		21	-0.266707	-0.922608	0.570304	0.944437	1	965	tags=38%, list=31%, signal=55%
MONOCARBOXYLIC ACID BIOSYNTHETIC PROCESS%GOBP%GO:0072330	MONOCARBOXYLIC ACID BIOSYNTHETIC PROCESS%GOBP%GO:0072330		37	-0.235873	-0.922431	0.594792	0.943914	1	221	tags=14%, list=7%, signal=14%
CELL-CELL ADHESION%GOBP%GO:0098609	CELL-CELL ADHESION%GOBP%GO:0098609		129	-0.198782	-0.921701	0.646941	0.944717	1	778	tags=29%, list=25%, signal=38%
CHONDROCYTE DIFFERENTIATION%GOBP%GO:0002062	CHONDROCYTE DIFFERENTIATION%GOBP%GO:0002062		18	-0.278019	-0.92113	0.57748	0.945076	1	1376	tags=61%, list=44%, signal=109%
NEGATIVE REGULATION OF NERVOUS SYSTEM DEVELOPMENT%GOBP%GO:0051961	NEGATIVE REGULATION OF NERVOUS SYSTEM DEVELOPMENT%GOBP%GO:0051961		41	-0.231565	-0.920968	0.599379	0.944526	1	1331	tags=49%, list=43%, signal=84%
EMBRYONIC ORGAN DEVELOPMENT%GOBP%GO:0048568	EMBRYONIC ORGAN DEVELOPMENT%GOBP%GO:0048568		44	-0.226541	-0.920871	0.606029	0.943873	1	1104	tags=39%, list=35%, signal=59%
SIGNALING BY INTERLEUKINS%REACTOME%R-HSA-449147.11	SIGNALING BY INTERLEUKINS%REACTOME%R-HSA-449147.11		86	-0.20847	-0.919843	0.643434	0.945228	1	1326	tags=47%, list=43%, signal=79%
POSITIVE REGULATION OF CATALYTIC ACTIVITY%GOBP%GO:0043085	POSITIVE REGULATION OF CATALYTIC ACTIVITY%GOBP%GO:0043085		203	-0.195299	-0.91841	0.698	0.947594	1	823	tags=27%, list=26%, signal=34%
POSITIVE REGULATION OF CELLULAR METABOLIC PROCESS%GOBP%GO:0031325	POSITIVE REGULATION OF CELLULAR METABOLIC PROCESS%GOBP%GO:0031325		453	-0.184311	-0.918171	0.741	0.94726	1	1312	tags=41%, list=42%, signal=60%
CELLULAR RESPONSE TO ACID CHEMICAL%GOBP%GO:0071229	CELLULAR RESPONSE TO ACID CHEMICAL%GOBP%GO:0071229		30	-0.248184	-0.918045	0.610572	0.946642	1	920	tags=33%, list=30%, signal=47%
VISUAL SYSTEM DEVELOPMENT%GOBP%GO:0150063	VISUAL SYSTEM DEVELOPMENT%GOBP%GO:0150063		45	-0.226735	-0.9173	0.612735	0.947394	1	1948	tags=73%, list=62%, signal=193%
CELLULAR RESPONSE TO DRUG%GOBP%GO:0035690	CELLULAR RESPONSE TO DRUG%GOBP%GO:0035690		40	-0.236202	-0.916237	0.613348	0.948912	1	1454	tags=50%, list=47%, signal=93%
PHOSPHORUS METABOLIC PROCESS%GOBP%GO:0006793	PHOSPHORUS METABOLIC PROCESS%GOBP%GO:0006793		267	-0.188771	-0.916105	0.708	0.948319	1	1542	tags=48%, list=49%, signal=87%
PDGF SIGNALING PATHWAY%PANTHER PATHWAY%P00047	PDGF SIGNALING PATHWAY%PANTHER PATHWAY%P00047		22	-0.260131	-0.915892	0.588764	0.947909	1	1973	tags=77%, list=63%, signal=209%
POSITIVE REGULATION OF LYMPHOCYTE DIFFERENTIATION%GOBP%GO:0045621	POSITIVE REGULATION OF LYMPHOCYTE DIFFERENTIATION%GOBP%GO:0045621		16	-0.285697	-0.91557	0.620848	0.947777	1	1495	tags=56%, list=48%, signal=108%
ORGANIC ANION TRANSPORT%GOBP%GO:0015711	ORGANIC ANION TRANSPORT%GOBP%GO:0015711		57	-0.217138	-0.915154	0.619097	0.947772	1	843	tags=30%, list=27%, signal=40%
TELENCEPHALON DEVELOPMENT%GOBP%GO:0021537	TELENCEPHALON DEVELOPMENT%GOBP%GO:0021537		24	-0.257116	-0.915143	0.600437	0.946893	1	1247	tags=42%, list=40%, signal=69%
RESPONSE TO OXIDATIVE STRESS%GOBP%GO:0006979	RESPONSE TO OXIDATIVE STRESS%GOBP%GO:0006979		37	-0.233426	-0.914744	0.604384	0.946958	1	1493	tags=54%, list=48%, signal=103%
CELLULAR HORMONE METABOLIC PROCESS%GOBP%GO:0034754	CELLULAR HORMONE METABOLIC PROCESS%GOBP%GO:0034754		17	-0.285988	-0.914628	0.581692	0.946314	1	316	tags=24%, list=10%, signal=26%
BLOOD VESSEL MORPHOGENESIS%GOBP%GO:0048514	BLOOD VESSEL MORPHOGENESIS%GOBP%GO:0048514		80	-0.206768	-0.914456	0.62614	0.945805	1	1677	tags=60%, list=54%, signal=127%
MESENCHYMAL CELL DIFFERENTIATION%GOBP%GO:0048762	MESENCHYMAL CELL DIFFERENTIATION%GOBP%GO:0048762		29	-0.248998	-0.914259	0.585837	0.945373	1	1284	tags=52%, list=41%, signal=87%
REGULATION OF ENDOTHELIAL CELL PROLIFERATION%GOBP%GO:0001936	REGULATION OF ENDOTHELIAL CELL PROLIFERATION%GOBP%GO:0001936		39	-0.231056	-0.913929	0.60443	0.945204	1	1991	tags=79%, list=64%, signal=217%
REGULATORY CIRCUITS OF THE STAT3 SIGNALING PATHWAY%WIKIPATHWAYS_20200510%WP4538%HOMO SAPIENS	REGULATORY CIRCUITS OF THE STAT3 SIGNALING PATHWAY%WIKIPATHWAYS_20200510%WP4538%HOMO SAPIENS		22	-0.262343	-0.91385	0.613687	0.94449	1	906	tags=36%, list=29%, signal=51%
ANION TRANSMEMBRANE TRANSPORT%GOBP%GO:0098656	ANION TRANSMEMBRANE TRANSPORT%GOBP%GO:0098656		21	-0.260269	-0.9134	0.6	0.944627	1	1308	tags=48%, list=42%, signal=81%
POSITIVE REGULATION OF NUCLEOBASE-CONTAINING COMPOUND METABOLIC PROCESS%GOBP%GO:0045935	POSITIVE REGULATION OF NUCLEOBASE-CONTAINING COMPOUND METABOLIC PROCESS%GOBP%GO:0045935		215	-0.189929	-0.913395	0.684	0.943746	1	1309	tags=40%, list=42%, signal=64%
HALLMARK_COMPLEMENT%MSIGDB_C2%HALLMARK_COMPLEMENT	HALLMARK_COMPLEMENT%MSIGDB_C2%HALLMARK_COMPLEMENT		54	-0.218471	-0.912635	0.625773	0.944457	1	1380	tags=52%, list=44%, signal=91%
TUBE MORPHOGENESIS%GOBP%GO:0035239	TUBE MORPHOGENESIS%GOBP%GO:0035239		107	-0.199404	-0.911785	0.660966	0.945493	1	1828	tags=65%, list=59%, signal=153%
CELL ADHESION%GOBP%GO:0007155	CELL ADHESION%GOBP%GO:0007155		221	-0.190782	-0.91025	0.704	0.948068	1	1331	tags=45%, list=43%, signal=73%
EMBRYONIC MORPHOGENESIS%GOBP%GO:0048598	EMBRYONIC MORPHOGENESIS%GOBP%GO:0048598		66	-0.210555	-0.910076	0.640609	0.947557	1	1553	tags=55%, list=50%, signal=106%
BIOLOGICAL OXIDATIONS%REACTOME DATABASE ID RELEASE 72%211859	BIOLOGICAL OXIDATIONS%REACTOME DATABASE ID RELEASE 72%211859		32	-0.240887	-0.909596	0.609524	0.947714	1	419	tags=19%, list=13%, signal=21%
POSITIVE REGULATION OF TRANSCRIPTION, DNA-TEMPLATED%GOBP%GO:0045893	POSITIVE REGULATION OF TRANSCRIPTION, DNA-TEMPLATED%GOBP%GO:0045893		194	-0.189914	-0.908234	0.696	0.949836	1	1309	tags=40%, list=42%, signal=65%
BIOLOGICAL ADHESION%GOBP%GO:0022610	BIOLOGICAL ADHESION%GOBP%GO:0022610		221	-0.190782	-0.907087	0.714	0.951342	1	1331	tags=45%, list=43%, signal=73%
IL-18 SIGNALING PATHWAY%WIKIPATHWAYS_20200510%WP4754%HOMO SAPIENS	IL-18 SIGNALING PATHWAY%WIKIPATHWAYS_20200510%WP4754%HOMO SAPIENS		51	-0.220206	-0.906942	0.635331	0.950779	1	1912	tags=73%, list=61%, signal=185%
REGULATION OF LOCOMOTION%GOBP%GO:0040012	REGULATION OF LOCOMOTION%GOBP%GO:0040012		218	-0.189332	-0.906787	0.712	0.950234	1	1493	tags=49%, list=48%, signal=88%
BETA-CATENIN INDEPENDENT WNT SIGNALING%REACTOME%R-HSA-3858494.3	BETA-CATENIN INDEPENDENT WNT SIGNALING%REACTOME%R-HSA-3858494.3		20	-0.261093	-0.906206	0.600451	0.950657	1	1973	tags=80%, list=63%, signal=217%
COAGULATION%GOBP%GO:0050817	COAGULATION%GOBP%GO:0050817		61	-0.210268	-0.905661	0.646154	0.950919	1	1836	tags=67%, list=59%, signal=160%
LNCRNA INVOLVEMENT IN CANONICAL WNT SIGNALING AND COLORECTAL CANCER%WIKIPATHWAYS_20200510%WP4258%HOMO SAPIENS	LNCRNA INVOLVEMENT IN CANONICAL WNT SIGNALING AND COLORECTAL CANCER%WIKIPATHWAYS_20200510%WP4258%HOMO SAPIENS		27	-0.247977	-0.905524	0.620763	0.950328	1	510	tags=22%, list=16%, signal=26%
PROTEOLYSIS%GOBP%GO:0006508	PROTEOLYSIS%GOBP%GO:0006508		114	-0.195925	-0.905275	0.677678	0.949986	1	524	tags=20%, list=17%, signal=23%
POSITIVE REGULATION OF MOLECULAR FUNCTION%GOBP%GO:0044093	POSITIVE REGULATION OF MOLECULAR FUNCTION%GOBP%GO:0044093		262	-0.18742	-0.904054	0.741	0.951697	1	1055	tags=32%, list=34%, signal=45%
MORPHOGENESIS OF A BRANCHING STRUCTURE%GOBP%GO:0001763	MORPHOGENESIS OF A BRANCHING STRUCTURE%GOBP%GO:0001763		21	-0.259266	-0.903099	0.600224	0.952899	1	1868	tags=81%, list=60%, signal=201%
PROTEIN METABOLIC PROCESS%GOBP%GO:0019538	PROTEIN METABOLIC PROCESS%GOBP%GO:0019538		427	-0.182042	-0.902023	0.795	0.954361	1	751	tags=24%, list=24%, signal=27%
HETEROTYPIC CELL-CELL ADHESION%GOBP%GO:0034113	HETEROTYPIC CELL-CELL ADHESION%GOBP%GO:0034113		16	-0.280485	-0.901677	0.603248	0.954225	1	1446	tags=63%, list=46%, signal=116%
MYELOID LEUKOCYTE ACTIVATION%GOBP%GO:0002274	MYELOID LEUKOCYTE ACTIVATION%GOBP%GO:0002274		138	-0.194284	-0.901577	0.705115	0.953536	1	1126	tags=36%, list=36%, signal=54%
CELLULAR RESPONSE TO NITROGEN COMPOUND%GOBP%GO:1901699	CELLULAR RESPONSE TO NITROGEN COMPOUND%GOBP%GO:1901699		81	-0.203723	-0.900484	0.653846	0.954967	1	1053	tags=33%, list=34%, signal=49%
POSITIVE REGULATION OF RNA BIOSYNTHETIC PROCESS%GOBP%GO:1902680	POSITIVE REGULATION OF RNA BIOSYNTHETIC PROCESS%GOBP%GO:1902680		195	-0.188509	-0.89992	0.714	0.955347	1	1309	tags=40%, list=42%, signal=65%
LEUKOCYTE PROLIFERATION%GOBP%GO:0070661	LEUKOCYTE PROLIFERATION%GOBP%GO:0070661		15	-0.286624	-0.899588	0.619785	0.955125	1	921	tags=40%, list=30%, signal=57%
VIRAL PROCESS%GOBP%GO:0016032	VIRAL PROCESS%GOBP%GO:0016032		26	-0.24993	-0.898979	0.616408	0.955542	1	1113	tags=42%, list=36%, signal=65%
RESPONSE TO WOUNDING%GOBP%GO:0009611	RESPONSE TO WOUNDING%GOBP%GO:0009611		110	-0.197548	-0.898651	0.682731	0.955372	1	1287	tags=44%, list=41%, signal=72%
ARTERY DEVELOPMENT%GOBP%GO:0060840	ARTERY DEVELOPMENT%GOBP%GO:0060840		15	-0.288466	-0.898598	0.618203	0.954604	1	1481	tags=60%, list=48%, signal=114%
PHOSPHATIDYLINOSITOL-MEDIATED SIGNALING%GOBP%GO:0048015	PHOSPHATIDYLINOSITOL-MEDIATED SIGNALING%GOBP%GO:0048015		16	-0.279031	-0.897685	0.609502	0.955641	1	469	tags=25%, list=15%, signal=29%
NEGATIVE REGULATION OF CELL PROLIFERATION%GOBP%GO:0008285	NEGATIVE REGULATION OF CELL PROLIFERATION%GOBP%GO:0008285		121	-0.195013	-0.897158	0.698	0.955911	1	1165	tags=36%, list=37%, signal=56%
REGIONALIZATION%GOBP%GO:0003002	REGIONALIZATION%GOBP%GO:0003002		23	-0.254048	-0.89701	0.630952	0.955327	1	1206	tags=48%, list=39%, signal=77%
REGULATION OF SIGNAL TRANSDUCTION%GOBP%GO:0009966	REGULATION OF SIGNAL TRANSDUCTION%GOBP%GO:0009966		494	-0.179694	-0.896938	0.791	0.954593	1	1328	tags=42%, list=43%, signal=61%
REGULATION OF GENE EXPRESSION%GOBP%GO:0010468	REGULATION OF GENE EXPRESSION%GOBP%GO:0010468		466	-0.180073	-0.894575	0.82	0.958771	1	1313	tags=40%, list=42%, signal=59%
TCF DEPENDENT SIGNALING IN RESPONSE TO WNT%REACTOME DATABASE ID RELEASE 72%201681	TCF DEPENDENT SIGNALING IN RESPONSE TO WNT%REACTOME DATABASE ID RELEASE 72%201681		20	-0.261295	-0.894166	0.634831	0.958729	1	243	tags=15%, list=8%, signal=16%
REGULATION OF TOLL-LIKE RECEPTOR SIGNALING PATHWAY%WIKIPATHWAYS_20200510%WP1449%HOMO SAPIENS	REGULATION OF TOLL-LIKE RECEPTOR SIGNALING PATHWAY%WIKIPATHWAYS_20200510%WP1449%HOMO SAPIENS		22	-0.25399	-0.893375	0.624719	0.959572	1	1540	tags=55%, list=49%, signal=107%
BLOOD COAGULATION%GOBP%GO:0007596	BLOOD COAGULATION%GOBP%GO:0007596		61	-0.210268	-0.892399	0.662577	0.960738	1	1836	tags=67%, list=59%, signal=160%
INOSITOL LIPID-MEDIATED SIGNALING%GOBP%GO:0048017	INOSITOL LIPID-MEDIATED SIGNALING%GOBP%GO:0048017		16	-0.279031	-0.89146	0.635723	0.961856	1	469	tags=25%, list=15%, signal=29%
REGULATION OF CELLULAR COMPONENT ORGANIZATION%GOBP%GO:0051128	REGULATION OF CELLULAR COMPONENT ORGANIZATION%GOBP%GO:0051128		390	-0.181641	-0.891053	0.795	0.961837	1	1328	tags=41%, list=43%, signal=62%
NEGATIVE REGULATION OF CELL DEVELOPMENT%GOBP%GO:0010721	NEGATIVE REGULATION OF CELL DEVELOPMENT%GOBP%GO:0010721		45	-0.220572	-0.890925	0.643006	0.961247	1	1331	tags=47%, list=43%, signal=80%
INTERFERON SIGNALING%REACTOME%R-HSA-913531.2	INTERFERON SIGNALING%REACTOME%R-HSA-913531.2		39	-0.223638	-0.889683	0.646138	0.96297	1	657	tags=23%, list=21%, signal=29%
FOREBRAIN DEVELOPMENT%GOBP%GO:0030900	FOREBRAIN DEVELOPMENT%GOBP%GO:0030900		35	-0.228351	-0.889151	0.646804	0.963224	1	1247	tags=40%, list=40%, signal=66%
PHOSPHATE-CONTAINING COMPOUND METABOLIC PROCESS%GOBP%GO:0006796	PHOSPHATE-CONTAINING COMPOUND METABOLIC PROCESS%GOBP%GO:0006796		262	-0.184592	-0.888693	0.766	0.963245	1	1542	tags=48%, list=49%, signal=87%
PROTEIN PHOSPHORYLATION%GOBP%GO:0006468	PROTEIN PHOSPHORYLATION%GOBP%GO:0006468		138	-0.191612	-0.888379	0.718155	0.962994	1	1542	tags=51%, list=49%, signal=96%
POSITIVE REGULATION OF I-KAPPAB KINASE/NF-KAPPAB SIGNALING%GOBP%GO:0043123	POSITIVE REGULATION OF I-KAPPAB KINASE/NF-KAPPAB SIGNALING%GOBP%GO:0043123		27	-0.242	-0.888369	0.623236	0.962143	1	552	tags=22%, list=18%, signal=27%
POSITIVE REGULATION OF PROTEIN PHOSPHORYLATION%GOBP%GO:0001934	POSITIVE REGULATION OF PROTEIN PHOSPHORYLATION%GOBP%GO:0001934		182	-0.187954	-0.886528	0.727455	0.965115	1	1312	tags=43%, list=42%, signal=70%
POSITIVE REGULATION OF NUCLEIC ACID-TEMPLATED TRANSCRIPTION%GOBP%GO:1903508	POSITIVE REGULATION OF NUCLEIC ACID-TEMPLATED TRANSCRIPTION%GOBP%GO:1903508		195	-0.188509	-0.886437	0.754	0.96442	1	1309	tags=40%, list=42%, signal=65%
POSITIVE REGULATION OF CELL-SUBSTRATE ADHESION%GOBP%GO:0010811	POSITIVE REGULATION OF CELL-SUBSTRATE ADHESION%GOBP%GO:0010811		29	-0.238635	-0.885957	0.63412	0.964502	1	273	tags=17%, list=9%, signal=19%
REGULATION OF PROTEIN LOCALIZATION TO MEMBRANE%GOBP%GO:1905475	REGULATION OF PROTEIN LOCALIZATION TO MEMBRANE%GOBP%GO:1905475		27	-0.241976	-0.885852	0.607527	0.963845	1	1328	tags=48%, list=43%, signal=83%
VESICLE LOCALIZATION%GOBP%GO:0051648	VESICLE LOCALIZATION%GOBP%GO:0051648		34	-0.228355	-0.885561	0.651579	0.963563	1	1353	tags=47%, list=43%, signal=82%
POSITIVE REGULATION OF PLASMA MEMBRANE BOUNDED CELL PROJECTION ASSEMBLY%GOBP%GO:0120034	POSITIVE REGULATION OF PLASMA MEMBRANE BOUNDED CELL PROJECTION ASSEMBLY%GOBP%GO:0120034		16	-0.272013	-0.885383	0.629673	0.963044	1	275	tags=19%, list=9%, signal=20%
NEGATIVE REGULATION OF RESPONSE TO EXTERNAL STIMULUS%GOBP%GO:0032102	NEGATIVE REGULATION OF RESPONSE TO EXTERNAL STIMULUS%GOBP%GO:0032102		59	-0.209037	-0.885213	0.674872	0.962531	1	1284	tags=46%, list=41%, signal=76%
CELL-MATRIX ADHESION%GOBP%GO:0007160	CELL-MATRIX ADHESION%GOBP%GO:0007160		42	-0.21862	-0.884744	0.654812	0.962612	1	1319	tags=50%, list=42%, signal=86%
REGULATION OF CELLULAR COMPONENT BIOGENESIS%GOBP%GO:0044087	REGULATION OF CELLULAR COMPONENT BIOGENESIS%GOBP%GO:0044087		134	-0.190312	-0.884418	0.727728	0.962412	1	889	tags=28%, list=29%, signal=38%
LEUKOCYTE ACTIVATION INVOLVED IN IMMUNE RESPONSE%GOBP%GO:0002366	LEUKOCYTE ACTIVATION INVOLVED IN IMMUNE RESPONSE%GOBP%GO:0002366		145	-0.189706	-0.884323	0.732465	0.961734	1	960	tags=32%, list=31%, signal=44%
REGULATION OF CELL MORPHOGENESIS%GOBP%GO:0022604	REGULATION OF CELL MORPHOGENESIS%GOBP%GO:0022604		94	-0.197517	-0.883773	0.717457	0.961991	1	1553	tags=52%, list=50%, signal=101%
MONOCARBOXYLIC ACID METABOLIC PROCESS%GOBP%GO:0032787	MONOCARBOXYLIC ACID METABOLIC PROCESS%GOBP%GO:0032787		65	-0.205246	-0.883386	0.667007	0.961931	1	269	tags=14%, list=9%, signal=15%
REGULATION OF CELL SHAPE%GOBP%GO:0008360	REGULATION OF CELL SHAPE%GOBP%GO:0008360		34	-0.226803	-0.882647	0.652822	0.962621	1	1929	tags=71%, list=62%, signal=183%
ACTIN FILAMENT ORGANIZATION%GOBP%GO:0007015	ACTIN FILAMENT ORGANIZATION%GOBP%GO:0007015		54	-0.208687	-0.882072	0.658137	0.96289	1	1225	tags=37%, list=39%, signal=60%
POSITIVE REGULATION OF RNA METABOLIC PROCESS%GOBP%GO:0051254	POSITIVE REGULATION OF RNA METABOLIC PROCESS%GOBP%GO:0051254		198	-0.187953	-0.88195	0.765	0.962274	1	1309	tags=40%, list=42%, signal=64%
REGULATION OF ANGIOGENESIS%GOBP%GO:0045765	REGULATION OF ANGIOGENESIS%GOBP%GO:0045765		81	-0.197744	-0.881261	0.683838	0.962756	1	1269	tags=43%, list=41%, signal=71%
REGULATION OF NEURON APOPTOTIC PROCESS%GOBP%GO:0043523	REGULATION OF NEURON APOPTOTIC PROCESS%GOBP%GO:0043523		30	-0.233943	-0.881175	0.654661	0.962072	1	1053	tags=40%, list=34%, signal=60%
REGULATION OF CELL MOTILITY%GOBP%GO:2000145	REGULATION OF CELL MOTILITY%GOBP%GO:2000145		212	-0.185389	-0.881109	0.772	0.961354	1	1493	tags=49%, list=48%, signal=87%
POSITIVE REGULATION OF NITROGEN COMPOUND METABOLIC PROCESS%GOBP%GO:0051173	POSITIVE REGULATION OF NITROGEN COMPOUND METABOLIC PROCESS%GOBP%GO:0051173		423	-0.178673	-0.880493	0.845	0.961682	1	1312	tags=40%, list=42%, signal=60%
CELLULAR AMINO ACID METABOLIC PROCESS%GOBP%GO:0006520	CELLULAR AMINO ACID METABOLIC PROCESS%GOBP%GO:0006520		43	-0.215569	-0.879932	0.659751	0.961918	1	1694	tags=58%, list=54%, signal=126%
TSLP%NETPATH%TSLP	TSLP%NETPATH%TSLP		24	-0.248119	-0.879785	0.653173	0.961367	1	707	tags=29%, list=23%, signal=37%
MULTICELLULAR ORGANISMAL HOMEOSTASIS%GOBP%GO:0048871	MULTICELLULAR ORGANISMAL HOMEOSTASIS%GOBP%GO:0048871		45	-0.217162	-0.879687	0.663158	0.960692	1	1499	tags=58%, list=48%, signal=110%
CELL ACTIVATION INVOLVED IN IMMUNE RESPONSE%GOBP%GO:0002263	CELL ACTIVATION INVOLVED IN IMMUNE RESPONSE%GOBP%GO:0002263		146	-0.188005	-0.879092	0.736209	0.961033	1	960	tags=32%, list=31%, signal=43%
CELLULAR RESPONSE TO INTERLEUKIN-1%GOBP%GO:0071347	CELLULAR RESPONSE TO INTERLEUKIN-1%GOBP%GO:0071347		18	-0.263156	-0.878427	0.625571	0.961467	1	1283	tags=50%, list=41%, signal=84%
NEGATIVE REGULATION OF IMMUNE RESPONSE%GOBP%GO:0050777	NEGATIVE REGULATION OF IMMUNE RESPONSE%GOBP%GO:0050777		29	-0.237179	-0.87557	0.64278	0.966244	1	1566	tags=59%, list=50%, signal=117%
REGULATION OF VASCULATURE DEVELOPMENT%GOBP%GO:1901342	REGULATION OF VASCULATURE DEVELOPMENT%GOBP%GO:1901342		91	-0.194495	-0.872724	0.702621	0.970987	1	1594	tags=55%, list=51%, signal=109%
AMINO ACID AND DERIVATIVE METABOLISM%REACTOME%R-HSA-71291.6	AMINO ACID AND DERIVATIVE METABOLISM%REACTOME%R-HSA-71291.6		41	-0.217637	-0.872613	0.656608	0.97033	1	1694	tags=61%, list=54%, signal=132%
PHOSPHORYLATION%GOBP%GO:0016310	PHOSPHORYLATION%GOBP%GO:0016310		157	-0.183861	-0.872201	0.755756	0.970227	1	1542	tags=49%, list=49%, signal=92%
RESPONSE TO NITROGEN COMPOUND%GOBP%GO:1901698	RESPONSE TO NITROGEN COMPOUND%GOBP%GO:1901698		113	-0.191245	-0.87161	0.733871	0.970532	1	1454	tags=45%, list=47%, signal=82%
EPITHELIAL TUBE MORPHOGENESIS%GOBP%GO:0060562	EPITHELIAL TUBE MORPHOGENESIS%GOBP%GO:0060562		38	-0.22155	-0.870936	0.667018	0.970982	1	1868	tags=71%, list=60%, signal=175%
PHASE I - FUNCTIONALIZATION OF COMPOUNDS%REACTOME DATABASE ID RELEASE 72%211945	PHASE I - FUNCTIONALIZATION OF COMPOUNDS%REACTOME DATABASE ID RELEASE 72%211945		18	-0.262499	-0.868975	0.645905	0.973957	1	1389	tags=50%, list=45%, signal=90%
NEGATIVE REGULATION OF CELL-CELL ADHESION%GOBP%GO:0022408	NEGATIVE REGULATION OF CELL-CELL ADHESION%GOBP%GO:0022408		27	-0.237483	-0.868844	0.677208	0.973365	1	1551	tags=56%, list=50%, signal=110%
FATTY ACID METABOLIC PROCESS%GOBP%GO:0006631	FATTY ACID METABOLIC PROCESS%GOBP%GO:0006631		41	-0.218365	-0.868714	0.694969	0.972774	1	269	tags=15%, list=9%, signal=16%
REGULATION OF EPITHELIAL CELL MIGRATION%GOBP%GO:0010632	REGULATION OF EPITHELIAL CELL MIGRATION%GOBP%GO:0010632		56	-0.206418	-0.868327	0.678571	0.972681	1	1542	tags=50%, list=49%, signal=97%
POSITIVE REGULATION OF EPITHELIAL CELL PROLIFERATION%GOBP%GO:0050679	POSITIVE REGULATION OF EPITHELIAL CELL PROLIFERATION%GOBP%GO:0050679		44	-0.216179	-0.86811	0.671148	0.972277	1	786	tags=30%, list=25%, signal=39%
CELLULAR RESPONSE TO ORGANONITROGEN COMPOUND%GOBP%GO:0071417	CELLULAR RESPONSE TO ORGANONITROGEN COMPOUND%GOBP%GO:0071417		73	-0.200007	-0.866698	0.711813	0.974185	1	1042	tags=33%, list=33%, signal=48%
PROTEIN FOLDING%GOBP%GO:0006457	PROTEIN FOLDING%GOBP%GO:0006457		17	-0.265207	-0.865942	0.645087	0.974771	1	1285	tags=47%, list=41%, signal=80%
CELLULAR RESPONSE TO STEROID HORMONE STIMULUS%GOBP%GO:0071383	CELLULAR RESPONSE TO STEROID HORMONE STIMULUS%GOBP%GO:0071383		19	-0.254736	-0.865524	0.636782	0.974729	1	1625	tags=58%, list=52%, signal=120%
RESPONSE TO EXTRACELLULAR STIMULUS%GOBP%GO:0009991	RESPONSE TO EXTRACELLULAR STIMULUS%GOBP%GO:0009991		48	-0.208708	-0.864866	0.658972	0.975175	1	213	tags=13%, list=7%, signal=13%
MYELOID CELL ACTIVATION INVOLVED IN IMMUNE RESPONSE%GOBP%GO:0002275	MYELOID CELL ACTIVATION INVOLVED IN IMMUNE RESPONSE%GOBP%GO:0002275		126	-0.188454	-0.864225	0.744489	0.975521	1	960	tags=31%, list=31%, signal=43%
REGULATION OF MOLECULAR FUNCTION%GOBP%GO:0065009	REGULATION OF MOLECULAR FUNCTION%GOBP%GO:0065009		429	-0.174333	-0.863944	0.879	0.975196	1	1055	tags=32%, list=34%, signal=42%
PHENOL-CONTAINING COMPOUND METABOLIC PROCESS%GOBP%GO:0018958	PHENOL-CONTAINING COMPOUND METABOLIC PROCESS%GOBP%GO:0018958		15	-0.274943	-0.862198	0.662322	0.977703	1	2051	tags=93%, list=66%, signal=272%
ORGANIC HYDROXY COMPOUND BIOSYNTHETIC PROCESS%GOBP%GO:1901617	ORGANIC HYDROXY COMPOUND BIOSYNTHETIC PROCESS%GOBP%GO:1901617		32	-0.226327	-0.862033	0.678685	0.977158	1	488	tags=19%, list=16%, signal=22%
REGULATION OF PROTEIN LOCALIZATION TO CELL PERIPHERY%GOBP%GO:1904375	REGULATION OF PROTEIN LOCALIZATION TO CELL PERIPHERY%GOBP%GO:1904375		19	-0.255666	-0.860305	0.669318	0.979595	1	920	tags=32%, list=30%, signal=45%
GRANULOCYTE ACTIVATION%GOBP%GO:0036230	GRANULOCYTE ACTIVATION%GOBP%GO:0036230		124	-0.185835	-0.85915	0.768537	0.980948	1	960	tags=31%, list=31%, signal=43%
POSITIVE REGULATION OF PHOSPHORYLATION%GOBP%GO:0042327	POSITIVE REGULATION OF PHOSPHORYLATION%GOBP%GO:0042327		198	-0.180523	-0.858358	0.8	0.981533	1	1312	tags=42%, list=42%, signal=68%
EYE DEVELOPMENT%GOBP%GO:0001654	EYE DEVELOPMENT%GOBP%GO:0001654		43	-0.211658	-0.857866	0.6907	0.981596	1	1948	tags=72%, list=62%, signal=190%
REGULATION OF LYMPHOCYTE MIGRATION%GOBP%GO:2000401	REGULATION OF LYMPHOCYTE MIGRATION%GOBP%GO:2000401		16	-0.267151	-0.857584	0.674338	0.981249	1	174	tags=19%, list=6%, signal=20%
POSITIVE REGULATION OF PEPTIDYL-SERINE PHOSPHORYLATION%GOBP%GO:0033138	POSITIVE REGULATION OF PEPTIDYL-SERINE PHOSPHORYLATION%GOBP%GO:0033138		16	-0.263971	-0.856684	0.671659	0.982115	1	2007	tags=88%, list=64%, signal=244%
NEUTROPHIL DEGRANULATION%GOBP%GO:0043312	NEUTROPHIL DEGRANULATION%GOBP%GO:0043312		121	-0.185616	-0.854821	0.761284	0.984732	1	960	tags=31%, list=31%, signal=42%
RHO GTPASE EFFECTORS%REACTOME%R-HSA-195258.3	RHO GTPASE EFFECTORS%REACTOME%R-HSA-195258.3		52	-0.206307	-0.854052	0.705274	0.985359	1	178	tags=12%, list=6%, signal=12%
HALLMARK_UV_RESPONSE_DN%MSIGDB_C2%HALLMARK_UV_RESPONSE_DN	HALLMARK_UV_RESPONSE_DN%MSIGDB_C2%HALLMARK_UV_RESPONSE_DN		39	-0.216997	-0.853963	0.700637	0.984665	1	1984	tags=74%, list=64%, signal=202%
PHOSPHOLIPID METABOLIC PROCESS%GOBP%GO:0006644	PHOSPHOLIPID METABOLIC PROCESS%GOBP%GO:0006644		44	-0.211699	-0.852843	0.682243	0.985868	1	567	tags=20%, list=18%, signal=25%
GLYCEROLIPID METABOLIC PROCESS%GOBP%GO:0046486	GLYCEROLIPID METABOLIC PROCESS%GOBP%GO:0046486		45	-0.214163	-0.852439	0.711759	0.985751	1	567	tags=22%, list=18%, signal=27%
NEUTROPHIL DEGRANULATION%REACTOME%R-HSA-6798695.2	NEUTROPHIL DEGRANULATION%REACTOME%R-HSA-6798695.2		121	-0.185615	-0.852257	0.769308	0.98524	1	960	tags=31%, list=31%, signal=42%
DISEASES OF METABOLISM%REACTOME%R-HSA-5668914.2	DISEASES OF METABOLISM%REACTOME%R-HSA-5668914.2		51	-0.205495	-0.8521	0.720123	0.984674	1	438	tags=18%, list=14%, signal=20%
POSITIVE REGULATION OF PROTEIN MODIFICATION PROCESS%GOBP%GO:0031401	POSITIVE REGULATION OF PROTEIN MODIFICATION PROCESS%GOBP%GO:0031401		208	-0.179349	-0.851806	0.820461	0.984347	1	1312	tags=42%, list=42%, signal=67%
NCRNAS INVOLVED IN WNT SIGNALING IN HEPATOCELLULAR CARCINOMA%WIKIPATHWAYS_20200510%WP4336%HOMO SAPIENS	NCRNAS INVOLVED IN WNT SIGNALING IN HEPATOCELLULAR CARCINOMA%WIKIPATHWAYS_20200510%WP4336%HOMO SAPIENS		25	-0.233429	-0.851668	0.672149	0.983725	1	252	tags=16%, list=8%, signal=17%
LEUKOCYTE DEGRANULATION%GOBP%GO:0043299	LEUKOCYTE DEGRANULATION%GOBP%GO:0043299		125	-0.183547	-0.851436	0.778557	0.98331	1	960	tags=30%, list=31%, signal=42%
THYROID HORMONES PRODUCTION AND THEIR PERIPHERAL DOWNSTREAM SIGNALLING EFFECTS REGARDING CONGENITAL HYPOTHYROIDISM%WIKIPATHWAYS_20200510%WP4746%HOMO SAPIENS	THYROID HORMONES PRODUCTION AND THEIR PERIPHERAL DOWNSTREAM SIGNALLING EFFECTS REGARDING CONGENITAL HYPOTHYROIDISM%WIKIPATHWAYS_20200510%WP4746%HOMO SAPIENS		20	-0.246639	-0.851216	0.661036	0.982872	1	1669	tags=60%, list=54%, signal=128%
SEXUAL REPRODUCTION%GOBP%GO:0019953	SEXUAL REPRODUCTION%GOBP%GO:0019953		35	-0.217746	-0.849861	0.694473	0.984538	1	980	tags=37%, list=31%, signal=54%
REGULATION OF RHO PROTEIN SIGNAL TRANSDUCTION%GOBP%GO:0035023	REGULATION OF RHO PROTEIN SIGNAL TRANSDUCTION%GOBP%GO:0035023		17	-0.256748	-0.849691	0.656463	0.984006	1	1860	tags=76%, list=60%, signal=189%
NEUTROPHIL ACTIVATION%GOBP%GO:0042119	NEUTROPHIL ACTIVATION%GOBP%GO:0042119		124	-0.185835	-0.849194	0.753507	0.984008	1	960	tags=31%, list=31%, signal=43%
CONNECTIVE TISSUE DEVELOPMENT%GOBP%GO:0061448	CONNECTIVE TISSUE DEVELOPMENT%GOBP%GO:0061448		28	-0.225071	-0.847418	0.697826	0.986425	1	1542	tags=61%, list=49%, signal=119%
REGULATION OF RESPONSE TO BIOTIC STIMULUS%GOBP%GO:0002831	REGULATION OF RESPONSE TO BIOTIC STIMULUS%GOBP%GO:0002831		17	-0.261933	-0.847014	0.690531	0.986295	1	241	tags=18%, list=8%, signal=19%
REGULATION OF ENDOTHELIAL CELL MIGRATION%GOBP%GO:0010594	REGULATION OF ENDOTHELIAL CELL MIGRATION%GOBP%GO:0010594		47	-0.206399	-0.846564	0.71473	0.986235	1	1542	tags=51%, list=49%, signal=100%
EPHRIN RECEPTOR SIGNALING PATHWAY%GOBP%GO:0048013	EPHRIN RECEPTOR SIGNALING PATHWAY%GOBP%GO:0048013		17	-0.259647	-0.846415	0.670901	0.985676	1	1142	tags=41%, list=37%, signal=65%
NEUTROPHIL ACTIVATION INVOLVED IN IMMUNE RESPONSE%GOBP%GO:0002283	NEUTROPHIL ACTIVATION INVOLVED IN IMMUNE RESPONSE%GOBP%GO:0002283		122	-0.183765	-0.846101	0.778335	0.985383	1	960	tags=30%, list=31%, signal=42%
NABA_MATRISOME_ASSOCIATED%MSIGDB_C2%NABA_MATRISOME_ASSOCIATED	NABA_MATRISOME_ASSOCIATED%MSIGDB_C2%NABA_MATRISOME_ASSOCIATED		217	-0.176343	-0.843553	0.834	0.988999	1	1347	tags=46%, list=43%, signal=76%
REGULATION OF MAPK CASCADE%GOBP%GO:0043408	REGULATION OF MAPK CASCADE%GOBP%GO:0043408		140	-0.181152	-0.842392	0.792377	0.990165	1	1009	tags=33%, list=32%, signal=46%
SIGNALING BY NTRKS%REACTOME DATABASE ID RELEASE 72%166520	SIGNALING BY NTRKS%REACTOME DATABASE ID RELEASE 72%166520		21	-0.242204	-0.842272	0.693169	0.989529	1	661	tags=24%, list=21%, signal=30%
BRAIN DEVELOPMENT%GOBP%GO:0007420	BRAIN DEVELOPMENT%GOBP%GO:0007420		72	-0.195327	-0.842083	0.745399	0.989038	1	1383	tags=43%, list=44%, signal=76%
RESPONSE TO VIRUS%GOBP%GO:0009615	RESPONSE TO VIRUS%GOBP%GO:0009615		43	-0.210421	-0.841932	0.724138	0.988443	1	1686	tags=60%, list=54%, signal=130%
FATTY ACID METABOLISM%REACTOME DATABASE ID RELEASE 72%8978868	FATTY ACID METABOLISM%REACTOME DATABASE ID RELEASE 72%8978868		28	-0.226171	-0.83892	0.686551	0.992949	1	857	tags=29%, list=27%, signal=39%
REGULATION OF ESTABLISHMENT OF PLANAR POLARITY%GOBP%GO:0090175	REGULATION OF ESTABLISHMENT OF PLANAR POLARITY%GOBP%GO:0090175		15	-0.265562	-0.838864	0.68347	0.992203	1	229	tags=13%, list=7%, signal=14%
HALLMARK_ANDROGEN_RESPONSE%MSIGDB_C2%HALLMARK_ANDROGEN_RESPONSE	HALLMARK_ANDROGEN_RESPONSE%MSIGDB_C2%HALLMARK_ANDROGEN_RESPONSE		20	-0.246937	-0.837565	0.670103	0.993634	1	533	tags=20%, list=17%, signal=24%
GLYCOPROTEIN BIOSYNTHETIC PROCESS%GOBP%GO:0009101	GLYCOPROTEIN BIOSYNTHETIC PROCESS%GOBP%GO:0009101		35	-0.214083	-0.8375	0.708553	0.992904	1	294	tags=14%, list=9%, signal=16%
HEAD DEVELOPMENT%GOBP%GO:0060322	HEAD DEVELOPMENT%GOBP%GO:0060322		77	-0.189315	-0.837301	0.760322	0.992413	1	1383	tags=43%, list=44%, signal=75%
REGULATION OF INTERLEUKIN-6 PRODUCTION%GOBP%GO:0032675	REGULATION OF INTERLEUKIN-6 PRODUCTION%GOBP%GO:0032675		25	-0.237608	-0.837224	0.700546	0.991706	1	1254	tags=52%, list=40%, signal=86%
TISSUE DEVELOPMENT%GOBP%GO:0009888	TISSUE DEVELOPMENT%GOBP%GO:0009888		303	-0.17253	-0.835991	0.881	0.992987	1	415	tags=16%, list=13%, signal=16%
POSITIVE REGULATION OF EXOCYTOSIS%GOBP%GO:0045921	POSITIVE REGULATION OF EXOCYTOSIS%GOBP%GO:0045921		20	-0.248821	-0.83585	0.684389	0.992403	1	1319	tags=60%, list=42%, signal=103%
VESICLE-MEDIATED TRANSPORT%REACTOME%R-HSA-5653656.2	VESICLE-MEDIATED TRANSPORT%REACTOME%R-HSA-5653656.2		101	-0.184552	-0.835764	0.759315	0.991708	1	1118	tags=35%, list=36%, signal=52%
POSITIVE REGULATION OF PRODUCTION OF MOLECULAR MEDIATOR OF IMMUNE RESPONSE%GOBP%GO:0002702	POSITIVE REGULATION OF PRODUCTION OF MOLECULAR MEDIATOR OF IMMUNE RESPONSE%GOBP%GO:0002702		18	-0.251848	-0.83505	0.686652	0.992069	1	454	tags=28%, list=15%, signal=32%
CELLULAR RESPONSE TO PEPTIDE HORMONE STIMULUS%GOBP%GO:0071375	CELLULAR RESPONSE TO PEPTIDE HORMONE STIMULUS%GOBP%GO:0071375		32	-0.222839	-0.833218	0.713525	0.994398	1	1203	tags=41%, list=39%, signal=65%
ERK1 ERK2 PATHWAY%REACTOME%R-HSA-5684996.4	ERK1 ERK2 PATHWAY%REACTOME%R-HSA-5684996.4		47	-0.201945	-0.832865	0.72973	0.994143	1	1609	tags=64%, list=52%, signal=130%
METAPATHWAY BIOTRANSFORMATION PHASE I AND II%WIKIPATHWAYS_20200510%WP702%HOMO SAPIENS	METAPATHWAY BIOTRANSFORMATION PHASE I AND II%WIKIPATHWAYS_20200510%WP702%HOMO SAPIENS		25	-0.231349	-0.830923	0.711939	0.996619	1	1016	tags=36%, list=33%, signal=53%
EPH-EPHRIN SIGNALING%REACTOME%R-HSA-2682334.1	EPH-EPHRIN SIGNALING%REACTOME%R-HSA-2682334.1		19	-0.248784	-0.830122	0.704622	0.997087	1	256	tags=16%, list=8%, signal=17%
RAF MAP KINASE CASCADE%REACTOME%R-HSA-5673001.8	RAF MAP KINASE CASCADE%REACTOME%R-HSA-5673001.8		45	-0.204494	-0.829688	0.724066	0.996937	1	1609	tags=64%, list=52%, signal=131%
HALLMARK_FATTY_ACID_METABOLISM%MSIGDB_C2%HALLMARK_FATTY_ACID_METABOLISM	HALLMARK_FATTY_ACID_METABOLISM%MSIGDB_C2%HALLMARK_FATTY_ACID_METABOLISM		17	-0.252169	-0.828785	0.694798	0.997616	1	1954	tags=76%, list=63%, signal=204%
POSITIVE REGULATION OF PROTEIN KINASE ACTIVITY%GOBP%GO:0045860	POSITIVE REGULATION OF PROTEIN KINASE ACTIVITY%GOBP%GO:0045860		90	-0.185363	-0.828432	0.776768	0.997372	1	1203	tags=38%, list=39%, signal=60%
COENZYME BIOSYNTHETIC PROCESS%GOBP%GO:0009108	COENZYME BIOSYNTHETIC PROCESS%GOBP%GO:0009108		20	-0.242956	-0.827676	0.711752	0.997796	1	1069	tags=35%, list=34%, signal=53%
NEGATIVE REGULATION OF NEURON APOPTOTIC PROCESS%GOBP%GO:0043524	NEGATIVE REGULATION OF NEURON APOPTOTIC PROCESS%GOBP%GO:0043524		21	-0.243866	-0.827115	0.697175	0.997939	1	1624	tags=62%, list=52%, signal=128%
RAS SIGNALING%WIKIPATHWAYS_20200510%WP4223%HOMO SAPIENS	RAS SIGNALING%WIKIPATHWAYS_20200510%WP4223%HOMO SAPIENS		43	-0.206097	-0.825312	0.732919	1	1	1584	tags=60%, list=51%, signal=121%
CELL PROJECTION ASSEMBLY%GOBP%GO:0030031	CELL PROJECTION ASSEMBLY%GOBP%GO:0030031		47	-0.202868	-0.824903	0.74613	0.999947	1	984	tags=30%, list=32%, signal=43%
POSITIVE REGULATION OF GROWTH%GOBP%GO:0045927	POSITIVE REGULATION OF GROWTH%GOBP%GO:0045927		26	-0.22653	-0.824202	0.728261	1	1	1643	tags=62%, list=53%, signal=129%
POSITIVE REGULATION OF EPITHELIAL CELL MIGRATION%GOBP%GO:0010634	POSITIVE REGULATION OF EPITHELIAL CELL MIGRATION%GOBP%GO:0010634		36	-0.211316	-0.823885	0.734542	1	1	1542	tags=53%, list=49%, signal=103%
MEMBRANE ORGANIZATION%GOBP%GO:0061024	MEMBRANE ORGANIZATION%GOBP%GO:0061024		112	-0.179422	-0.82209	0.786573	1	1	1056	tags=31%, list=34%, signal=46%
INTERLEUKIN-4 AND INTERLEUKIN-13 SIGNALING%REACTOME DATABASE ID RELEASE 72%6785807	INTERLEUKIN-4 AND INTERLEUKIN-13 SIGNALING%REACTOME DATABASE ID RELEASE 72%6785807		35	-0.215304	-0.822014	0.738428	1	1	1709	tags=66%, list=55%, signal=144%
HORMONE-MEDIATED SIGNALING PATHWAY%GOBP%GO:0009755	HORMONE-MEDIATED SIGNALING PATHWAY%GOBP%GO:0009755		15	-0.258754	-0.821373	0.710094	1	1	709	tags=27%, list=23%, signal=34%
REGULATION OF INTRACELLULAR SIGNAL TRANSDUCTION%GOBP%GO:1902531	REGULATION OF INTRACELLULAR SIGNAL TRANSDUCTION%GOBP%GO:1902531		311	-0.168617	-0.820582	0.899	1	1	1316	tags=40%, list=42%, signal=63%
CELLULAR AMIDE METABOLIC PROCESS%GOBP%GO:0043603	CELLULAR AMIDE METABOLIC PROCESS%GOBP%GO:0043603		74	-0.187592	-0.820522	0.77472	1	1	524	tags=18%, list=17%, signal=21%
POSITIVE REGULATION OF REACTIVE OXYGEN SPECIES METABOLIC PROCESS%GOBP%GO:2000379	POSITIVE REGULATION OF REACTIVE OXYGEN SPECIES METABOLIC PROCESS%GOBP%GO:2000379		21	-0.24031	-0.819348	0.716036	1	1	1127	tags=38%, list=36%, signal=59%
MAPK FAMILY SIGNALING CASCADES%REACTOME%R-HSA-5683057.3	MAPK FAMILY SIGNALING CASCADES%REACTOME%R-HSA-5683057.3		50	-0.199227	-0.818989	0.729814	1	1	1609	tags=62%, list=52%, signal=126%
WNT_SIGNALING%MSIGDB_C2%WNT_SIGNALING	WNT_SIGNALING%MSIGDB_C2%WNT_SIGNALING		28	-0.22159	-0.818589	0.705044	1	1	252	tags=14%, list=8%, signal=15%
REGULATION OF DNA METABOLIC PROCESS%GOBP%GO:0051052	REGULATION OF DNA METABOLIC PROCESS%GOBP%GO:0051052		43	-0.204902	-0.812609	0.771277	1	1	380	tags=16%, list=12%, signal=18%
RHYTHMIC PROCESS%GOBP%GO:0048511	RHYTHMIC PROCESS%GOBP%GO:0048511		18	-0.244484	-0.811663	0.729919	1	1	334	tags=17%, list=11%, signal=19%
NEUTROPHIL MEDIATED IMMUNITY%GOBP%GO:0002446	NEUTROPHIL MEDIATED IMMUNITY%GOBP%GO:0002446		124	-0.177027	-0.811646	0.836673	1	1	960	tags=30%, list=31%, signal=41%
STEM CELL DIFFERENTIATION%GOBP%GO:0048863	STEM CELL DIFFERENTIATION%GOBP%GO:0048863		25	-0.222649	-0.811587	0.735294	1	1	1510	tags=56%, list=48%, signal=108%
REGULATION OF CELLULAR RESPONSE TO TRANSFORMING GROWTH FACTOR BETA STIMULUS%GOBP%GO:1903844	REGULATION OF CELLULAR RESPONSE TO TRANSFORMING GROWTH FACTOR BETA STIMULUS%GOBP%GO:1903844		19	-0.240251	-0.811328	0.705157	1	1	1828	tags=68%, list=59%, signal=164%
WOUND HEALING%GOBP%GO:0042060	WOUND HEALING%GOBP%GO:0042060		97	-0.180616	-0.811242	0.797189	1	1	1441	tags=47%, list=46%, signal=85%
ESTABLISHMENT OF VESICLE LOCALIZATION%GOBP%GO:0051650	ESTABLISHMENT OF VESICLE LOCALIZATION%GOBP%GO:0051650		33	-0.214075	-0.811038	0.746849	1	1	1353	tags=45%, list=43%, signal=79%
MYELOID LEUKOCYTE MEDIATED IMMUNITY%GOBP%GO:0002444	MYELOID LEUKOCYTE MEDIATED IMMUNITY%GOBP%GO:0002444		127	-0.176767	-0.809353	0.831832	1	1	1126	tags=35%, list=36%, signal=52%
REGULATION OF CATALYTIC ACTIVITY%GOBP%GO:0050790	REGULATION OF CATALYTIC ACTIVITY%GOBP%GO:0050790		312	-0.164611	-0.806684	0.91	1	1	829	tags=25%, list=27%, signal=31%
REGULATION OF TRANSFORMING GROWTH FACTOR BETA RECEPTOR SIGNALING PATHWAY%GOBP%GO:0017015	REGULATION OF TRANSFORMING GROWTH FACTOR BETA RECEPTOR SIGNALING PATHWAY%GOBP%GO:0017015		19	-0.240251	-0.805504	0.729213	1	1	1828	tags=68%, list=59%, signal=164%
NEGATIVE REGULATION OF MOLECULAR FUNCTION%GOBP%GO:0044092	NEGATIVE REGULATION OF MOLECULAR FUNCTION%GOBP%GO:0044092		141	-0.172305	-0.804796	0.831832	1	1	756	tags=23%, list=24%, signal=30%
MULTICELLULAR ORGANISMAL REPRODUCTIVE PROCESS%GOBP%GO:0048609	MULTICELLULAR ORGANISMAL REPRODUCTIVE PROCESS%GOBP%GO:0048609		38	-0.203459	-0.804649	0.734244	1	1	1703	tags=63%, list=55%, signal=138%
NEGATIVE REGULATION OF CANONICAL WNT SIGNALING PATHWAY%GOBP%GO:0090090	NEGATIVE REGULATION OF CANONICAL WNT SIGNALING PATHWAY%GOBP%GO:0090090		29	-0.216578	-0.804373	0.744009	1	1	1856	tags=66%, list=60%, signal=160%
BETA1 INTEGRIN CELL SURFACE INTERACTIONS%PATHWAY INTERACTION DATABASE NCI-NATURE CURATED DATA%BETA1 INTEGRIN CELL SURFACE INTERACTIONS	BETA1 INTEGRIN CELL SURFACE INTERACTIONS%PATHWAY INTERACTION DATABASE NCI-NATURE CURATED DATA%BETA1 INTEGRIN CELL SURFACE INTERACTIONS		39	-0.201705	-0.801747	0.758693	1	1	1449	tags=54%, list=46%, signal=99%
REGULATION OF INTRACELLULAR PROTEIN TRANSPORT%GOBP%GO:0033157	REGULATION OF INTRACELLULAR PROTEIN TRANSPORT%GOBP%GO:0033157		21	-0.229169	-0.801209	0.728492	1	1	1319	tags=43%, list=42%, signal=74%
PID_INTEGRIN1_PATHWAY%MSIGDB_C2%PID_INTEGRIN1_PATHWAY	PID_INTEGRIN1_PATHWAY%MSIGDB_C2%PID_INTEGRIN1_PATHWAY		39	-0.201705	-0.800543	0.757384	1	1	1449	tags=54%, list=46%, signal=99%
SPROUTING ANGIOGENESIS%GOBP%GO:0002040	SPROUTING ANGIOGENESIS%GOBP%GO:0002040		18	-0.242518	-0.799488	0.75982	1	1	1662	tags=67%, list=53%, signal=142%
OSTEOBLAST DIFFERENTIATION%WIKIPATHWAYS_20200510%WP4787%HOMO SAPIENS	OSTEOBLAST DIFFERENTIATION%WIKIPATHWAYS_20200510%WP4787%HOMO SAPIENS		30	-0.215127	-0.798092	0.757219	1	1	567	tags=20%, list=18%, signal=24%
ALPHA-AMINO ACID METABOLIC PROCESS%GOBP%GO:1901605	ALPHA-AMINO ACID METABOLIC PROCESS%GOBP%GO:1901605		33	-0.208466	-0.797297	0.764392	1	1	1590	tags=55%, list=51%, signal=110%
GAMETE GENERATION%GOBP%GO:0007276	GAMETE GENERATION%GOBP%GO:0007276		27	-0.21705	-0.796023	0.73362	1	1	1703	tags=67%, list=55%, signal=146%
SLC-MEDIATED TRANSMEMBRANE TRANSPORT%REACTOME DATABASE ID RELEASE 72%425407	SLC-MEDIATED TRANSMEMBRANE TRANSPORT%REACTOME DATABASE ID RELEASE 72%425407		40	-0.203997	-0.795933	0.76	1	1	844	tags=30%, list=27%, signal=41%
TISSUE MIGRATION%GOBP%GO:0090130	TISSUE MIGRATION%GOBP%GO:0090130		33	-0.206657	-0.795855	0.75188	1	1	296	tags=15%, list=9%, signal=17%
GLYCOPROTEIN METABOLIC PROCESS%GOBP%GO:0009100	GLYCOPROTEIN METABOLIC PROCESS%GOBP%GO:0009100		43	-0.19796	-0.795483	0.770594	1	1	294	tags=14%, list=9%, signal=15%
PATTERN SPECIFICATION PROCESS%GOBP%GO:0007389	PATTERN SPECIFICATION PROCESS%GOBP%GO:0007389		34	-0.206774	-0.795339	0.760259	1	1	1501	tags=53%, list=48%, signal=101%
WNT SIGNALING PATHWAY%PANTHER PATHWAY%P00057	WNT SIGNALING PATHWAY%PANTHER PATHWAY%P00057		63	-0.187794	-0.794073	0.797146	1	1	2020	tags=73%, list=65%, signal=203%
MULTICELLULAR ORGANISM REPRODUCTION%GOBP%GO:0032504	MULTICELLULAR ORGANISM REPRODUCTION%GOBP%GO:0032504		38	-0.203459	-0.793524	0.765016	1	1	1703	tags=63%, list=55%, signal=138%
REGULATION OF TRANSMEMBRANE RECEPTOR PROTEIN SERINE/THREONINE KINASE SIGNALING PATHWAY%GOBP%GO:0090092	REGULATION OF TRANSMEMBRANE RECEPTOR PROTEIN SERINE/THREONINE KINASE SIGNALING PATHWAY%GOBP%GO:0090092		48	-0.191995	-0.792203	0.782117	1	1	1469	tags=48%, list=47%, signal=89%
REGULATION OF CELL JUNCTION ASSEMBLY%GOBP%GO:1901888	REGULATION OF CELL JUNCTION ASSEMBLY%GOBP%GO:1901888		21	-0.226295	-0.791957	0.738839	1	1	2014	tags=76%, list=65%, signal=214%
CELLULAR AMINO ACID CATABOLIC PROCESS%GOBP%GO:0009063	CELLULAR AMINO ACID CATABOLIC PROCESS%GOBP%GO:0009063		22	-0.227518	-0.790109	0.769911	1	1	1694	tags=64%, list=54%, signal=138%
CELLULAR RESPONSE TO TYPE I INTERFERON%GOBP%GO:0071357	CELLULAR RESPONSE TO TYPE I INTERFERON%GOBP%GO:0071357		16	-0.242509	-0.789642	0.733796	1	1	2143	tags=88%, list=69%, signal=279%
CARBOXYLIC ACID METABOLIC PROCESS%GOBP%GO:0019752	CARBOXYLIC ACID METABOLIC PROCESS%GOBP%GO:0019752		121	-0.171656	-0.789331	0.859719	1	1	861	tags=25%, list=28%, signal=33%
CYTOKINE SIGNALING IN IMMUNE SYSTEM%REACTOME%R-HSA-1280215.4	CYTOKINE SIGNALING IN IMMUNE SYSTEM%REACTOME%R-HSA-1280215.4		165	-0.168507	-0.788941	0.87	1	1	611	tags=22%, list=20%, signal=26%
NEGATIVE REGULATION OF RESPONSE TO STIMULUS%GOBP%GO:0048585	NEGATIVE REGULATION OF RESPONSE TO STIMULUS%GOBP%GO:0048585		267	-0.162226	-0.788802	0.921	1	1	1030	tags=31%, list=33%, signal=42%
POST-TRANSLATIONAL PROTEIN PHOSPHORYLATION%REACTOME%R-HSA-8957275.1	POST-TRANSLATIONAL PROTEIN PHOSPHORYLATION%REACTOME%R-HSA-8957275.1		23	-0.223556	-0.788434	0.748344	1	1	326	tags=17%, list=10%, signal=19%
HALLMARK_ADIPOGENESIS%MSIGDB_C2%HALLMARK_ADIPOGENESIS	HALLMARK_ADIPOGENESIS%MSIGDB_C2%HALLMARK_ADIPOGENESIS		32	-0.210187	-0.78784	0.751599	1	1	1891	tags=63%, list=61%, signal=157%
OSTEOBLAST DIFFERENTIATION%GOBP%GO:0001649	OSTEOBLAST DIFFERENTIATION%GOBP%GO:0001649		17	-0.239953	-0.787257	0.745743	1	1	273	tags=18%, list=9%, signal=19%
SIGNALING BY WNT%REACTOME%R-HSA-195721.5	SIGNALING BY WNT%REACTOME%R-HSA-195721.5		43	-0.195381	-0.785796	0.782427	1	1	1973	tags=70%, list=63%, signal=187%
ORGANOPHOSPHATE BIOSYNTHETIC PROCESS%GOBP%GO:0090407	ORGANOPHOSPHATE BIOSYNTHETIC PROCESS%GOBP%GO:0090407		63	-0.181909	-0.784089	0.805924	1	1	1069	tags=30%, list=34%, signal=45%
REGULATION OF TRANSCRIPTION BY RNA POLYMERASE II%GOBP%GO:0006357	REGULATION OF TRANSCRIPTION BY RNA POLYMERASE II%GOBP%GO:0006357		248	-0.162027	-0.783564	0.914	1	1	1313	tags=39%, list=42%, signal=62%
BRANCHING MORPHOGENESIS OF AN EPITHELIAL TUBE%GOBP%GO:0048754	BRANCHING MORPHOGENESIS OF AN EPITHELIAL TUBE%GOBP%GO:0048754		16	-0.24043	-0.783431	0.741973	1	1	1868	tags=81%, list=60%, signal=202%
PRIMARY FOCAL SEGMENTAL GLOMERULOSCLEROSIS FSGS%WIKIPATHWAYS_20200510%WP2572%HOMO SAPIENS	PRIMARY FOCAL SEGMENTAL GLOMERULOSCLEROSIS FSGS%WIKIPATHWAYS_20200510%WP2572%HOMO SAPIENS		15	-0.246508	-0.781729	0.758823	1	1	707	tags=27%, list=23%, signal=34%
POSTTRANSCRIPTIONAL REGULATION OF GENE EXPRESSION%GOBP%GO:0010608	POSTTRANSCRIPTIONAL REGULATION OF GENE EXPRESSION%GOBP%GO:0010608		22	-0.2237	-0.780941	0.781111	1	1	1233	tags=41%, list=40%, signal=67%
ACTIVATION OF PROTEIN KINASE ACTIVITY%GOBP%GO:0032147	ACTIVATION OF PROTEIN KINASE ACTIVITY%GOBP%GO:0032147		50	-0.189852	-0.780783	0.794422	1	1	1417	tags=44%, list=45%, signal=79%
CELLULAR RESPONSE TO ENVIRONMENTAL STIMULUS%GOBP%GO:0104004	CELLULAR RESPONSE TO ENVIRONMENTAL STIMULUS%GOBP%GO:0104004		22	-0.223256	-0.780253	0.764706	1	1	1295	tags=41%, list=42%, signal=69%
CARBOHYDRATE HOMEOSTASIS%GOBP%GO:0033500	CARBOHYDRATE HOMEOSTASIS%GOBP%GO:0033500		15	-0.245879	-0.778314	0.761574	1	1	1357	tags=47%, list=44%, signal=82%
POSITIVE REGULATION OF CELLULAR PROTEIN METABOLIC PROCESS%GOBP%GO:0032270	POSITIVE REGULATION OF CELLULAR PROTEIN METABOLIC PROCESS%GOBP%GO:0032270		246	-0.160716	-0.777743	0.91	1	1	1312	tags=40%, list=42%, signal=64%
POSITIVE REGULATION OF PROTEIN METABOLIC PROCESS%GOBP%GO:0051247	POSITIVE REGULATION OF PROTEIN METABOLIC PROCESS%GOBP%GO:0051247		259	-0.161358	-0.777659	0.925926	1	1	1328	tags=41%, list=43%, signal=65%
REGULATION OF ANIMAL ORGAN MORPHOGENESIS%GOBP%GO:2000027	REGULATION OF ANIMAL ORGAN MORPHOGENESIS%GOBP%GO:2000027		33	-0.201011	-0.776846	0.7537	1	1	1274	tags=39%, list=41%, signal=66%
NEGATIVE REGULATION OF NEUROGENESIS%GOBP%GO:0050768	NEGATIVE REGULATION OF NEUROGENESIS%GOBP%GO:0050768		37	-0.196501	-0.776723	0.765642	1	1	1331	tags=46%, list=43%, signal=79%
INTERFERON ALPHA BETA SIGNALING%REACTOME%R-HSA-909733.2	INTERFERON ALPHA BETA SIGNALING%REACTOME%R-HSA-909733.2		18	-0.235075	-0.775939	0.762181	1	1	2278	tags=94%, list=73%, signal=349%
CELLULAR RESPONSE TO ABIOTIC STIMULUS%GOBP%GO:0071214	CELLULAR RESPONSE TO ABIOTIC STIMULUS%GOBP%GO:0071214		22	-0.223256	-0.775659	0.758583	1	1	1295	tags=41%, list=42%, signal=69%
POSITIVE REGULATION OF KINASE ACTIVITY%GOBP%GO:0033674	POSITIVE REGULATION OF KINASE ACTIVITY%GOBP%GO:0033674		109	-0.171509	-0.775445	0.860582	1	1	1312	tags=40%, list=42%, signal=67%
TYPE I INTERFERON SIGNALING PATHWAY%GOBP%GO:0060337	TYPE I INTERFERON SIGNALING PATHWAY%GOBP%GO:0060337		16	-0.242509	-0.775032	0.743322	1	1	2143	tags=88%, list=69%, signal=279%
RHO GTPASE CYCLE%REACTOME DATABASE ID RELEASE 72%194840	RHO GTPASE CYCLE%REACTOME DATABASE ID RELEASE 72%194840		32	-0.20152	-0.774155	0.773848	1	1	1553	tags=53%, list=50%, signal=105%
POSITIVE REGULATION OF VASCULATURE DEVELOPMENT%GOBP%GO:1904018	POSITIVE REGULATION OF VASCULATURE DEVELOPMENT%GOBP%GO:1904018		51	-0.186376	-0.773723	0.805383	1	1	1594	tags=55%, list=51%, signal=111%
POSITIVE REGULATION OF DNA METABOLIC PROCESS%GOBP%GO:0051054	POSITIVE REGULATION OF DNA METABOLIC PROCESS%GOBP%GO:0051054		24	-0.217033	-0.77357	0.7631	1	1	344	tags=17%, list=11%, signal=19%
LEPTIN%NETPATH%LEPTIN	LEPTIN%NETPATH%LEPTIN		16	-0.23923	-0.77347	0.745475	1	1	1493	tags=50%, list=48%, signal=95%
ESTABLISHMENT OF LOCALIZATION IN CELL%GOBP%GO:0051649	ESTABLISHMENT OF LOCALIZATION IN CELL%GOBP%GO:0051649		161	-0.163414	-0.772677	0.885772	1	1	1052	tags=29%, list=34%, signal=42%
MORPHOGENESIS OF A BRANCHING EPITHELIUM%GOBP%GO:0061138	MORPHOGENESIS OF A BRANCHING EPITHELIUM%GOBP%GO:0061138		16	-0.24043	-0.772084	0.763825	1	1	1868	tags=81%, list=60%, signal=202%
REGULATION OF CYSTEINE-TYPE ENDOPEPTIDASE ACTIVITY%GOBP%GO:2000116	REGULATION OF CYSTEINE-TYPE ENDOPEPTIDASE ACTIVITY%GOBP%GO:2000116		27	-0.20858	-0.77074	0.767742	1	1	552	tags=22%, list=18%, signal=27%
NEGATIVE REGULATION OF WNT SIGNALING PATHWAY%GOBP%GO:0030178	NEGATIVE REGULATION OF WNT SIGNALING PATHWAY%GOBP%GO:0030178		36	-0.197189	-0.770286	0.790526	1	1	1856	tags=64%, list=60%, signal=156%
REGULATION OF ORGANELLE ORGANIZATION%GOBP%GO:0033043	REGULATION OF ORGANELLE ORGANIZATION%GOBP%GO:0033043		172	-0.162991	-0.76852	0.903711	1	1	390	tags=14%, list=13%, signal=15%
REGULATION OF I-KAPPAB KINASE/NF-KAPPAB SIGNALING%GOBP%GO:0043122	REGULATION OF I-KAPPAB KINASE/NF-KAPPAB SIGNALING%GOBP%GO:0043122		29	-0.207331	-0.76832	0.777657	1	1	703	tags=24%, list=23%, signal=31%
REGULATION OF SMALL MOLECULE METABOLIC PROCESS%GOBP%GO:0062012	REGULATION OF SMALL MOLECULE METABOLIC PROCESS%GOBP%GO:0062012		54	-0.181607	-0.767814	0.795478	1	1	389	tags=15%, list=12%, signal=17%
GLUCOSE HOMEOSTASIS%GOBP%GO:0042593	GLUCOSE HOMEOSTASIS%GOBP%GO:0042593		15	-0.245879	-0.766173	0.772196	1	1	1357	tags=47%, list=44%, signal=82%
SENSORY ORGAN DEVELOPMENT%GOBP%GO:0007423	SENSORY ORGAN DEVELOPMENT%GOBP%GO:0007423		48	-0.187996	-0.76538	0.786681	1	1	1948	tags=69%, list=62%, signal=180%
REGULATION OF PEPTIDYL-SERINE PHOSPHORYLATION%GOBP%GO:0033135	REGULATION OF PEPTIDYL-SERINE PHOSPHORYLATION%GOBP%GO:0033135		23	-0.216348	-0.765294	0.762222	1	1	2011	tags=78%, list=65%, signal=219%
REGULATION OF ACTOMYOSIN STRUCTURE ORGANIZATION%GOBP%GO:0110020	REGULATION OF ACTOMYOSIN STRUCTURE ORGANIZATION%GOBP%GO:0110020		20	-0.224471	-0.765007	0.781145	1	1	273	tags=15%, list=9%, signal=16%
REGULATION OF STRESS FIBER ASSEMBLY%GOBP%GO:0051492	REGULATION OF STRESS FIBER ASSEMBLY%GOBP%GO:0051492		20	-0.224471	-0.764071	0.771205	1	1	273	tags=15%, list=9%, signal=16%
REPRODUCTIVE SYSTEM DEVELOPMENT%GOBP%GO:0061458	REPRODUCTIVE SYSTEM DEVELOPMENT%GOBP%GO:0061458		25	-0.213152	-0.763478	0.794673	1	1	389	tags=16%, list=12%, signal=18%
GERM CELL DEVELOPMENT%GOBP%GO:0007281	GERM CELL DEVELOPMENT%GOBP%GO:0007281		16	-0.236995	-0.762536	0.7875	1	1	1703	tags=69%, list=55%, signal=151%
ALPHA-AMINO ACID CATABOLIC PROCESS%GOBP%GO:1901606	ALPHA-AMINO ACID CATABOLIC PROCESS%GOBP%GO:1901606		21	-0.218381	-0.760301	0.774193	1	1	1694	tags=62%, list=54%, signal=135%
NEGATIVE REGULATION OF CELL COMMUNICATION%GOBP%GO:0010648	NEGATIVE REGULATION OF CELL COMMUNICATION%GOBP%GO:0010648		211	-0.158758	-0.759888	0.911	1	1	1030	tags=30%, list=33%, signal=42%
REGULATION OF PLASMA MEMBRANE BOUNDED CELL PROJECTION ASSEMBLY%GOBP%GO:0120032	REGULATION OF PLASMA MEMBRANE BOUNDED CELL PROJECTION ASSEMBLY%GOBP%GO:0120032		26	-0.207186	-0.759819	0.786108	1	1	322	tags=15%, list=10%, signal=17%
PROTEIN LOCALIZATION TO MEMBRANE%GOBP%GO:0072657	PROTEIN LOCALIZATION TO MEMBRANE%GOBP%GO:0072657		56	-0.17999	-0.758345	0.827657	1	1	272	tags=13%, list=9%, signal=13%
REPRODUCTIVE STRUCTURE DEVELOPMENT%GOBP%GO:0048608	REPRODUCTIVE STRUCTURE DEVELOPMENT%GOBP%GO:0048608		25	-0.213152	-0.757838	0.791805	1	1	389	tags=16%, list=12%, signal=18%
REGULATION OF PROTEIN METABOLIC PROCESS%GOBP%GO:0051246	REGULATION OF PROTEIN METABOLIC PROCESS%GOBP%GO:0051246		400	-0.153634	-0.757491	0.973	1	1	1328	tags=40%, list=43%, signal=60%
PROTEIN MODIFICATION BY SMALL PROTEIN CONJUGATION%GOBP%GO:0032446	PROTEIN MODIFICATION BY SMALL PROTEIN CONJUGATION%GOBP%GO:0032446		35	-0.197178	-0.757158	0.806758	1	1	282	tags=11%, list=9%, signal=12%
ANGIOGENESIS%PANTHER PATHWAY%P00005	ANGIOGENESIS%PANTHER PATHWAY%P00005		39	-0.191374	-0.756978	0.799159	1	1	1991	tags=72%, list=64%, signal=196%
ORGANIC ACID BIOSYNTHETIC PROCESS%GOBP%GO:0016053	ORGANIC ACID BIOSYNTHETIC PROCESS%GOBP%GO:0016053		55	-0.18053	-0.755451	0.835052	1	1	1069	tags=31%, list=34%, signal=46%
CARBOXYLIC ACID BIOSYNTHETIC PROCESS%GOBP%GO:0046394	CARBOXYLIC ACID BIOSYNTHETIC PROCESS%GOBP%GO:0046394		55	-0.18053	-0.754712	0.834012	1	1	1069	tags=31%, list=34%, signal=46%
NEGATIVE REGULATION OF CELL PROJECTION ORGANIZATION%GOBP%GO:0031345	NEGATIVE REGULATION OF CELL PROJECTION ORGANIZATION%GOBP%GO:0031345		19	-0.223953	-0.75367	0.789651	1	1	1666	tags=63%, list=53%, signal=135%
NEGATIVE REGULATION OF CELL-SUBSTRATE ADHESION%GOBP%GO:0010812	NEGATIVE REGULATION OF CELL-SUBSTRATE ADHESION%GOBP%GO:0010812		15	-0.237273	-0.752894	0.789035	1	1	1767	tags=60%, list=57%, signal=138%
NEPHRON EPITHELIUM DEVELOPMENT%GOBP%GO:0072009	NEPHRON EPITHELIUM DEVELOPMENT%GOBP%GO:0072009		16	-0.236583	-0.752763	0.784795	1	1	1328	tags=50%, list=43%, signal=87%
REGULATION OF CELL-SUBSTRATE ADHESION%GOBP%GO:0010810	REGULATION OF CELL-SUBSTRATE ADHESION%GOBP%GO:0010810		45	-0.187049	-0.751489	0.819401	1	1	273	tags=13%, list=9%, signal=14%
PLATELET ACTIVATION%GOBP%GO:0030168	PLATELET ACTIVATION%GOBP%GO:0030168		36	-0.194779	-0.751169	0.804025	1	1	935	tags=33%, list=30%, signal=47%
CARBOHYDRATE DERIVATIVE BIOSYNTHETIC PROCESS%GOBP%GO:1901137	CARBOHYDRATE DERIVATIVE BIOSYNTHETIC PROCESS%GOBP%GO:1901137		87	-0.17145	-0.750969	0.859297	1	1	1077	tags=31%, list=35%, signal=46%
DENDRITE DEVELOPMENT%GOBP%GO:0016358	DENDRITE DEVELOPMENT%GOBP%GO:0016358		16	-0.231541	-0.749699	0.803991	1	1	1600	tags=63%, list=51%, signal=128%
REGULATION OF MAP KINASE ACTIVITY%GOBP%GO:0043405	REGULATION OF MAP KINASE ACTIVITY%GOBP%GO:0043405		52	-0.181043	-0.749293	0.818088	1	1	711	tags=23%, list=23%, signal=29%
NEGATIVE REGULATION OF SIGNALING%GOBP%GO:0023057	NEGATIVE REGULATION OF SIGNALING%GOBP%GO:0023057		212	-0.155425	-0.748735	0.929	1	1	1030	tags=30%, list=33%, signal=42%
REGULATION OF ADHERENS JUNCTION ORGANIZATION%GOBP%GO:1903391	REGULATION OF ADHERENS JUNCTION ORGANIZATION%GOBP%GO:1903391		16	-0.229546	-0.748354	0.774827	1	1	2014	tags=75%, list=65%, signal=211%
PURINE NUCLEOSIDE MONOPHOSPHATE METABOLIC PROCESS%GOBP%GO:0009126	PURINE NUCLEOSIDE MONOPHOSPHATE METABOLIC PROCESS%GOBP%GO:0009126		16	-0.230331	-0.746647	0.786621	1	1	1531	tags=50%, list=49%, signal=98%
POSITIVE REGULATION OF ANGIOGENESIS%GOBP%GO:0045766	POSITIVE REGULATION OF ANGIOGENESIS%GOBP%GO:0045766		45	-0.18388	-0.746002	0.818939	1	1	1646	tags=58%, list=53%, signal=121%
PURINE RIBONUCLEOSIDE MONOPHOSPHATE METABOLIC PROCESS%GOBP%GO:0009167	PURINE RIBONUCLEOSIDE MONOPHOSPHATE METABOLIC PROCESS%GOBP%GO:0009167		16	-0.230331	-0.745809	0.794083	1	1	1531	tags=50%, list=49%, signal=98%
SMALL MOLECULE METABOLIC PROCESS%GOBP%GO:0044281	SMALL MOLECULE METABOLIC PROCESS%GOBP%GO:0044281		236	-0.153805	-0.745792	0.930931	1	1	497	tags=16%, list=16%, signal=17%
POSITIVE REGULATION OF ENDOTHELIAL CELL PROLIFERATION%GOBP%GO:0001938	POSITIVE REGULATION OF ENDOTHELIAL CELL PROLIFERATION%GOBP%GO:0001938		26	-0.205864	-0.745127	0.82321	1	1	2087	tags=85%, list=67%, signal=254%
RIBONUCLEOSIDE MONOPHOSPHATE METABOLIC PROCESS%GOBP%GO:0009161	RIBONUCLEOSIDE MONOPHOSPHATE METABOLIC PROCESS%GOBP%GO:0009161		16	-0.230331	-0.744427	0.798165	1	1	1531	tags=50%, list=49%, signal=98%
THERMOGENESIS%WIKIPATHWAYS_20200510%WP4321%HOMO SAPIENS	THERMOGENESIS%WIKIPATHWAYS_20200510%WP4321%HOMO SAPIENS		16	-0.235405	-0.743119	0.815036	1	1	2087	tags=81%, list=67%, signal=245%
COLLAGEN FORMATION%REACTOME DATABASE ID RELEASE 72%1474290	COLLAGEN FORMATION%REACTOME DATABASE ID RELEASE 72%1474290		44	-0.182817	-0.742003	0.840414	1	1	2097	tags=77%, list=67%, signal=233%
MAPK SIGNALING PATHWAY%WIKIPATHWAYS_20200510%WP382%HOMO SAPIENS	MAPK SIGNALING PATHWAY%WIKIPATHWAYS_20200510%WP382%HOMO SAPIENS		53	-0.176228	-0.739293	0.839468	1	1	1584	tags=51%, list=51%, signal=102%
REGULATION OF MACROMOLECULE BIOSYNTHETIC PROCESS%GOBP%GO:0010556	REGULATION OF MACROMOLECULE BIOSYNTHETIC PROCESS%GOBP%GO:0010556		402	-0.149223	-0.738061	0.983	1	1	1313	tags=38%, list=42%, signal=57%
POSITIVE REGULATION OF WNT SIGNALING PATHWAY%GOBP%GO:0030177	POSITIVE REGULATION OF WNT SIGNALING PATHWAY%GOBP%GO:0030177		25	-0.207241	-0.737733	0.81413	1	1	607	tags=24%, list=19%, signal=30%
SMALL MOLECULE BIOSYNTHETIC PROCESS%GOBP%GO:0044283	SMALL MOLECULE BIOSYNTHETIC PROCESS%GOBP%GO:0044283		92	-0.16341	-0.737633	0.869828	1	1	488	tags=15%, list=16%, signal=18%
CELL-SUBSTRATE ADHESION%GOBP%GO:0031589	CELL-SUBSTRATE ADHESION%GOBP%GO:0031589		55	-0.176773	-0.737034	0.858316	1	1	1469	tags=51%, list=47%, signal=95%
REGULATION OF RESPONSE TO DNA DAMAGE STIMULUS%GOBP%GO:2001020	REGULATION OF RESPONSE TO DNA DAMAGE STIMULUS%GOBP%GO:2001020		24	-0.208342	-0.734792	0.829135	1	1	870	tags=29%, list=28%, signal=40%
EYE MORPHOGENESIS%GOBP%GO:0048592	EYE MORPHOGENESIS%GOBP%GO:0048592		19	-0.216399	-0.734409	0.824826	1	1	1938	tags=74%, list=62%, signal=194%
REGULATION OF PROTEIN PHOSPHORYLATION%GOBP%GO:0001932	REGULATION OF PROTEIN PHOSPHORYLATION%GOBP%GO:0001932		249	-0.151857	-0.733483	0.954	1	1	1319	tags=39%, list=42%, signal=63%
NUCLEOSIDE MONOPHOSPHATE METABOLIC PROCESS%GOBP%GO:0009123	NUCLEOSIDE MONOPHOSPHATE METABOLIC PROCESS%GOBP%GO:0009123		16	-0.230331	-0.733441	0.801898	1	1	1531	tags=50%, list=49%, signal=98%
NEGATIVE REGULATION OF CELLULAR PROTEIN LOCALIZATION%GOBP%GO:1903828	NEGATIVE REGULATION OF CELLULAR PROTEIN LOCALIZATION%GOBP%GO:1903828		15	-0.22883	-0.732541	0.789099	1	1	1873	tags=67%, list=60%, signal=166%
CELLULAR RESPONSE TO OXIDATIVE STRESS%GOBP%GO:0034599	CELLULAR RESPONSE TO OXIDATIVE STRESS%GOBP%GO:0034599		25	-0.203609	-0.731699	0.8125	1	1	1702	tags=60%, list=55%, signal=131%
CAMERA-TYPE EYE DEVELOPMENT%GOBP%GO:0043010	CAMERA-TYPE EYE DEVELOPMENT%GOBP%GO:0043010		29	-0.198465	-0.731217	0.809061	1	1	1948	tags=72%, list=62%, signal=191%
REGULATION OF PHOSPHORYLATION%GOBP%GO:0042325	REGULATION OF PHOSPHORYLATION%GOBP%GO:0042325		264	-0.150809	-0.73092	0.962	1	1	1319	tags=39%, list=42%, signal=62%
REGULATION OF BIOSYNTHETIC PROCESS%GOBP%GO:0009889	REGULATION OF BIOSYNTHETIC PROCESS%GOBP%GO:0009889		434	-0.148763	-0.730896	0.99	1	1	1313	tags=37%, list=42%, signal=56%
NEGATIVE REGULATION OF SIGNAL TRANSDUCTION%GOBP%GO:0009968	NEGATIVE REGULATION OF SIGNAL TRANSDUCTION%GOBP%GO:0009968		201	-0.152734	-0.728703	0.93994	1	1	1030	tags=30%, list=33%, signal=42%
REGULATION OF ACTION POTENTIAL%GOBP%GO:0098900	REGULATION OF ACTION POTENTIAL%GOBP%GO:0098900		20	-0.210269	-0.726919	0.817372	1	1	1001	tags=35%, list=32%, signal=51%
POSITIVE REGULATION OF ENDOTHELIAL CELL MIGRATION%GOBP%GO:0010595	POSITIVE REGULATION OF ENDOTHELIAL CELL MIGRATION%GOBP%GO:0010595		28	-0.194079	-0.726126	0.82851	1	1	1542	tags=54%, list=49%, signal=105%
SIGNALING BY NTRK1 (TRKA)%REACTOME DATABASE ID RELEASE 72%187037	SIGNALING BY NTRK1 (TRKA)%REACTOME DATABASE ID RELEASE 72%187037		18	-0.217952	-0.725869	0.819653	1	1	661	tags=22%, list=21%, signal=28%
POSITIVE REGULATION OF CELLULAR PROTEIN LOCALIZATION%GOBP%GO:1903829	POSITIVE REGULATION OF CELLULAR PROTEIN LOCALIZATION%GOBP%GO:1903829		38	-0.182204	-0.724898	0.827476	1	1	1035	tags=29%, list=33%, signal=43%
REGULATION OF G PROTEIN-COUPLED RECEPTOR SIGNALING PATHWAY%GOBP%GO:0008277	REGULATION OF G PROTEIN-COUPLED RECEPTOR SIGNALING PATHWAY%GOBP%GO:0008277		24	-0.203073	-0.72466	0.807947	1	1	812	tags=29%, list=26%, signal=39%
REGULATION OF CELL PROJECTION ASSEMBLY%GOBP%GO:0060491	REGULATION OF CELL PROJECTION ASSEMBLY%GOBP%GO:0060491		27	-0.198343	-0.723165	0.821076	1	1	322	tags=15%, list=10%, signal=16%
SIGNALING BY HEDGEHOG%REACTOME DATABASE ID RELEASE 72%5358351	SIGNALING BY HEDGEHOG%REACTOME DATABASE ID RELEASE 72%5358351		17	-0.219124	-0.722038	0.81713	1	1	1857	tags=65%, list=60%, signal=159%
REGULATION OF PHOSPHORUS METABOLIC PROCESS%GOBP%GO:0051174	REGULATION OF PHOSPHORUS METABOLIC PROCESS%GOBP%GO:0051174		285	-0.147096	-0.719493	0.972	1	1	1319	tags=39%, list=42%, signal=61%
REGULATION OF MULTI-ORGANISM PROCESS%GOBP%GO:0043900	REGULATION OF MULTI-ORGANISM PROCESS%GOBP%GO:0043900		51	-0.174249	-0.719041	0.838477	1	1	552	tags=20%, list=18%, signal=23%
REGULATION OF PROTEIN MODIFICATION PROCESS%GOBP%GO:0031399	REGULATION OF PROTEIN MODIFICATION PROCESS%GOBP%GO:0031399		283	-0.148143	-0.719023	0.968	1	1	1319	tags=39%, list=42%, signal=61%
UROKINASE-TYPE PLASMINOGEN ACTIVATOR (UPA) AND UPAR-MEDIATED SIGNALING%PATHWAY INTERACTION DATABASE NCI-NATURE CURATED DATA%UROKINASE-TYPE PLASMINOGEN ACTIVATOR (UPA) AND UPAR-MEDIATED SIGNALING	UROKINASE-TYPE PLASMINOGEN ACTIVATOR (UPA) AND UPAR-MEDIATED SIGNALING%PATHWAY INTERACTION DATABASE NCI-NATURE CURATED DATA%UROKINASE-TYPE PLASMINOGEN ACTIVATOR (UPA) AND UPAR-MEDIATED SIGNALING		17	-0.216243	-0.718966	0.802326	1	1	368	tags=24%, list=12%, signal=27%
INTERSPECIES INTERACTION BETWEEN ORGANISMS%GOBP%GO:0044419	INTERSPECIES INTERACTION BETWEEN ORGANISMS%GOBP%GO:0044419		43	-0.181122	-0.716216	0.850886	1	1	991	tags=35%, list=32%, signal=50%
REGULATION OF PHOSPHATE METABOLIC PROCESS%GOBP%GO:0019220	REGULATION OF PHOSPHATE METABOLIC PROCESS%GOBP%GO:0019220		285	-0.147096	-0.714582	0.975	1	1	1319	tags=39%, list=42%, signal=61%
PEPTIDE SECRETION%GOBP%GO:0002790	PEPTIDE SECRETION%GOBP%GO:0002790		21	-0.204989	-0.713741	0.834437	1	1	1233	tags=43%, list=40%, signal=70%
REGULATION OF SMALL GTPASE MEDIATED SIGNAL TRANSDUCTION%GOBP%GO:0051056	REGULATION OF SMALL GTPASE MEDIATED SIGNAL TRANSDUCTION%GOBP%GO:0051056		59	-0.169428	-0.713093	0.871663	1	1	1750	tags=56%, list=56%, signal=125%
RESPONSE TO PEPTIDE HORMONE%GOBP%GO:0043434	RESPONSE TO PEPTIDE HORMONE%GOBP%GO:0043434		35	-0.188037	-0.713004	0.850698	1	1	1203	tags=37%, list=39%, signal=60%
REGULATION OF SPROUTING ANGIOGENESIS%GOBP%GO:1903670	REGULATION OF SPROUTING ANGIOGENESIS%GOBP%GO:1903670		23	-0.201777	-0.711416	0.827933	1	1	1901	tags=74%, list=61%, signal=188%
PROTEIN LOCALIZATION TO ORGANELLE%GOBP%GO:0033365	PROTEIN LOCALIZATION TO ORGANELLE%GOBP%GO:0033365		42	-0.173862	-0.711354	0.865204	1	1	103	tags=5%, list=3%, signal=5%
EPITHELIAL CELL PROLIFERATION%GOBP%GO:0050673	EPITHELIAL CELL PROLIFERATION%GOBP%GO:0050673		15	-0.224145	-0.710758	0.835125	1	1	560	tags=27%, list=18%, signal=32%
NEGATIVE REGULATION OF CATABOLIC PROCESS%GOBP%GO:0009895	NEGATIVE REGULATION OF CATABOLIC PROCESS%GOBP%GO:0009895		27	-0.193442	-0.710126	0.822757	1	1	1274	tags=41%, list=41%, signal=68%
REGULATION OF CELLULAR BIOSYNTHETIC PROCESS%GOBP%GO:0031326	REGULATION OF CELLULAR BIOSYNTHETIC PROCESS%GOBP%GO:0031326		416	-0.143438	-0.709905	0.987	1	1	1313	tags=37%, list=42%, signal=55%
MALE GAMETE GENERATION%GOBP%GO:0048232	MALE GAMETE GENERATION%GOBP%GO:0048232		22	-0.201059	-0.707788	0.844944	1	1	1703	tags=64%, list=55%, signal=139%
REGULATION OF PROTEIN SERINE/THREONINE KINASE ACTIVITY%GOBP%GO:0071900	REGULATION OF PROTEIN SERINE/THREONINE KINASE ACTIVITY%GOBP%GO:0071900		76	-0.162212	-0.707474	0.903943	1	1	583	tags=18%, list=19%, signal=22%
ECTODERM DIFFERENTIATION%WIKIPATHWAYS_20200510%WP2858%HOMO SAPIENS	ECTODERM DIFFERENTIATION%WIKIPATHWAYS_20200510%WP2858%HOMO SAPIENS		36	-0.182923	-0.706231	0.848034	1	1	1601	tags=53%, list=51%, signal=107%
DNA DAMAGE RESPONSE (ONLY ATM DEPENDENT)%WIKIPATHWAYS_20200510%WP710%HOMO SAPIENS	DNA DAMAGE RESPONSE (ONLY ATM DEPENDENT)%WIKIPATHWAYS_20200510%WP710%HOMO SAPIENS		19	-0.206256	-0.704976	0.838857	1	1	446	tags=16%, list=14%, signal=18%
REGULATION OF HEART RATE BY CARDIAC CONDUCTION%GOBP%GO:0086091	REGULATION OF HEART RATE BY CARDIAC CONDUCTION%GOBP%GO:0086091		15	-0.223789	-0.704679	0.853774	1	1	1523	tags=60%, list=49%, signal=117%
PID_UPA_UPAR_PATHWAY%MSIGDB_C2%PID_UPA_UPAR_PATHWAY	PID_UPA_UPAR_PATHWAY%MSIGDB_C2%PID_UPA_UPAR_PATHWAY		17	-0.216243	-0.70442	0.83692	1	1	368	tags=24%, list=12%, signal=27%
HALLMARK_BILE_ACID_METABOLISM%MSIGDB_C2%HALLMARK_BILE_ACID_METABOLISM	HALLMARK_BILE_ACID_METABOLISM%MSIGDB_C2%HALLMARK_BILE_ACID_METABOLISM		17	-0.217724	-0.703519	0.844595	1	1	1535	tags=59%, list=49%, signal=115%
POSITIVE REGULATION OF CELL-MATRIX ADHESION%GOBP%GO:0001954	POSITIVE REGULATION OF CELL-MATRIX ADHESION%GOBP%GO:0001954		17	-0.216557	-0.703192	0.849078	1	1	758	tags=24%, list=24%, signal=31%
ORGANOPHOSPHATE METABOLIC PROCESS%GOBP%GO:0019637	ORGANOPHOSPHATE METABOLIC PROCESS%GOBP%GO:0019637		111	-0.154202	-0.70253	0.922846	1	1	1542	tags=43%, list=49%, signal=83%
SYNDECAN-1-MEDIATED SIGNALING EVENTS%PATHWAY INTERACTION DATABASE NCI-NATURE CURATED DATA%SYNDECAN-1-MEDIATED SIGNALING EVENTS	SYNDECAN-1-MEDIATED SIGNALING EVENTS%PATHWAY INTERACTION DATABASE NCI-NATURE CURATED DATA%SYNDECAN-1-MEDIATED SIGNALING EVENTS		17	-0.211162	-0.702378	0.850746	1	1	1376	tags=53%, list=44%, signal=94%
PROTEIN O-LINKED GLYCOSYLATION%GOBP%GO:0006493	PROTEIN O-LINKED GLYCOSYLATION%GOBP%GO:0006493		17	-0.213788	-0.702286	0.821469	1	1	154	tags=12%, list=5%, signal=12%
DEFENSE RESPONSE TO VIRUS%GOBP%GO:0051607	DEFENSE RESPONSE TO VIRUS%GOBP%GO:0051607		26	-0.19565	-0.702231	0.851934	1	1	2147	tags=85%, list=69%, signal=270%
SPERMATOGENESIS%GOBP%GO:0007283	SPERMATOGENESIS%GOBP%GO:0007283		22	-0.201059	-0.700874	0.845815	1	1	1703	tags=64%, list=55%, signal=139%
CELLULAR PROTEIN-CONTAINING COMPLEX ASSEMBLY%GOBP%GO:0034622	CELLULAR PROTEIN-CONTAINING COMPLEX ASSEMBLY%GOBP%GO:0034622		50	-0.168055	-0.700369	0.870197	1	1	249	tags=12%, list=8%, signal=13%
CELLULAR LOCALIZATION%GOBP%GO:0051641	CELLULAR LOCALIZATION%GOBP%GO:0051641		255	-0.146322	-0.69969	0.964	1	1	409	tags=13%, list=13%, signal=14%
PROTEIN-CONTAINING COMPLEX DISASSEMBLY%GOBP%GO:0032984	PROTEIN-CONTAINING COMPLEX DISASSEMBLY%GOBP%GO:0032984		15	-0.224064	-0.699608	0.841379	1	1	299	tags=13%, list=10%, signal=15%
COLLAGEN DEGRADATION%REACTOME%R-HSA-1442490.3	COLLAGEN DEGRADATION%REACTOME%R-HSA-1442490.3		15	-0.222451	-0.699063	0.84023	1	1	608	tags=27%, list=20%, signal=33%
REGULATION OF MORPHOGENESIS OF AN EPITHELIUM%GOBP%GO:1905330	REGULATION OF MORPHOGENESIS OF AN EPITHELIUM%GOBP%GO:1905330		25	-0.197326	-0.699037	0.846731	1	1	1462	tags=48%, list=47%, signal=90%
CARBOHYDRATE DERIVATIVE METABOLIC PROCESS%GOBP%GO:1901135	CARBOHYDRATE DERIVATIVE METABOLIC PROCESS%GOBP%GO:1901135		132	-0.150446	-0.695969	0.934804	1	1	301	tags=11%, list=10%, signal=12%
ESR-MEDIATED SIGNALING%REACTOME DATABASE ID RELEASE 72%8939211	ESR-MEDIATED SIGNALING%REACTOME DATABASE ID RELEASE 72%8939211		25	-0.193529	-0.694441	0.852747	1	1	292	tags=16%, list=9%, signal=18%
PYRIDINE-CONTAINING COMPOUND METABOLIC PROCESS%GOBP%GO:0072524	PYRIDINE-CONTAINING COMPOUND METABOLIC PROCESS%GOBP%GO:0072524		21	-0.199908	-0.694402	0.842163	1	1	1140	tags=33%, list=37%, signal=52%
REGULATION OF BODY FLUID LEVELS%GOBP%GO:0050878	REGULATION OF BODY FLUID LEVELS%GOBP%GO:0050878		93	-0.153046	-0.693486	0.908543	1	1	1037	tags=32%, list=33%, signal=47%
LIPID TRANSPORT%GOBP%GO:0006869	LIPID TRANSPORT%GOBP%GO:0006869		36	-0.178795	-0.689808	0.864026	1	1	497	tags=17%, list=16%, signal=20%
CANONICAL WNT SIGNALING PATHWAY%GOBP%GO:0060070	CANONICAL WNT SIGNALING PATHWAY%GOBP%GO:0060070		23	-0.194705	-0.689016	0.842047	1	1	252	tags=13%, list=8%, signal=14%
REGULATION OF LIPID TRANSPORT%GOBP%GO:0032368	REGULATION OF LIPID TRANSPORT%GOBP%GO:0032368		21	-0.197588	-0.688166	0.84307	1	1	1127	tags=38%, list=36%, signal=59%
STEROID BIOSYNTHETIC PROCESS%GOBP%GO:0006694	STEROID BIOSYNTHETIC PROCESS%GOBP%GO:0006694		24	-0.18944	-0.688125	0.853496	1	1	316	tags=13%, list=10%, signal=14%
AMINO ACID TRANSPORT%GOBP%GO:0006865	AMINO ACID TRANSPORT%GOBP%GO:0006865		24	-0.189878	-0.686135	0.852013	1	1	794	tags=29%, list=25%, signal=39%
GLYCEROPHOSPHOLIPID BIOSYNTHESIS%REACTOME%R-HSA-1483206.4	GLYCEROPHOSPHOLIPID BIOSYNTHESIS%REACTOME%R-HSA-1483206.4		19	-0.203463	-0.685846	0.844419	1	1	383	tags=16%, list=12%, signal=18%
LIPID BIOSYNTHETIC PROCESS%GOBP%GO:0008610	LIPID BIOSYNTHETIC PROCESS%GOBP%GO:0008610		88	-0.152904	-0.683012	0.922222	1	1	316	tags=11%, list=10%, signal=12%
REGULATION OF CELL MORPHOGENESIS INVOLVED IN DIFFERENTIATION%GOBP%GO:0010769	REGULATION OF CELL MORPHOGENESIS INVOLVED IN DIFFERENTIATION%GOBP%GO:0010769		49	-0.166732	-0.682987	0.878756	1	1	1284	tags=41%, list=41%, signal=68%
POSITIVE REGULATION OF SPROUTING ANGIOGENESIS%GOBP%GO:1903672	POSITIVE REGULATION OF SPROUTING ANGIOGENESIS%GOBP%GO:1903672		15	-0.214218	-0.682975	0.864802	1	1	1542	tags=60%, list=49%, signal=118%
STEROID METABOLIC PROCESS%GOBP%GO:0008202	STEROID METABOLIC PROCESS%GOBP%GO:0008202		33	-0.17491	-0.682124	0.868282	1	1	316	tags=12%, list=10%, signal=13%
RESPONSE TO TYPE I INTERFERON%GOBP%GO:0034340	RESPONSE TO TYPE I INTERFERON%GOBP%GO:0034340		17	-0.207495	-0.681638	0.840936	1	1	2143	tags=82%, list=69%, signal=262%
PHOSPHOLIPID METABOLISM%REACTOME DATABASE ID RELEASE 72%1483257	PHOSPHOLIPID METABOLISM%REACTOME DATABASE ID RELEASE 72%1483257		25	-0.188424	-0.67959	0.85872	1	1	567	tags=20%, list=18%, signal=24%
MACROMOLECULE BIOSYNTHETIC PROCESS%GOBP%GO:0009059	MACROMOLECULE BIOSYNTHETIC PROCESS%GOBP%GO:0009059		132	-0.145898	-0.67453	0.938816	1	1	427	tags=13%, list=14%, signal=14%
PID_SYNDECAN_1_PATHWAY%MSIGDB_C2%PID_SYNDECAN_1_PATHWAY	PID_SYNDECAN_1_PATHWAY%MSIGDB_C2%PID_SYNDECAN_1_PATHWAY		25	-0.187053	-0.672923	0.870187	1	1	1376	tags=48%, list=44%, signal=85%
POSITIVE REGULATION OF DEFENSE RESPONSE%GOBP%GO:0031349	POSITIVE REGULATION OF DEFENSE RESPONSE%GOBP%GO:0031349		76	-0.155039	-0.670441	0.918016	1	1	1458	tags=50%, list=47%, signal=92%
REGULATION OF MITOCHONDRION ORGANIZATION%GOBP%GO:0010821	REGULATION OF MITOCHONDRION ORGANIZATION%GOBP%GO:0010821		22	-0.190525	-0.670068	0.851441	1	1	111	tags=9%, list=4%, signal=9%
SYMBIONT PROCESS%GOBP%GO:0044403	SYMBIONT PROCESS%GOBP%GO:0044403		36	-0.171287	-0.667916	0.885684	1	1	991	tags=33%, list=32%, signal=48%
OXIDATION-REDUCTION PROCESS%GOBP%GO:0055114	OXIDATION-REDUCTION PROCESS%GOBP%GO:0055114		50	-0.160855	-0.667859	0.894628	1	1	1563	tags=48%, list=50%, signal=95%
MESODERM DEVELOPMENT%GOBP%GO:0007498	MESODERM DEVELOPMENT%GOBP%GO:0007498		16	-0.206982	-0.667093	0.864155	1	1	1358	tags=50%, list=44%, signal=88%
FLT3 SIGNALING%REACTOME%R-HSA-9607240.3	FLT3 SIGNALING%REACTOME%R-HSA-9607240.3		49	-0.162525	-0.666691	0.911795	1	1	1609	tags=59%, list=52%, signal=120%
POSITIVE REGULATION OF TRANSFERASE ACTIVITY%GOBP%GO:0051347	POSITIVE REGULATION OF TRANSFERASE ACTIVITY%GOBP%GO:0051347		121	-0.14447	-0.666207	0.948692	1	1	750	tags=22%, list=24%, signal=28%
POST-TRANSLATIONAL MODIFICATION: SYNTHESIS OF GPI-ANCHORED PROTEINS%REACTOME%R-HSA-163125.2	POST-TRANSLATIONAL MODIFICATION: SYNTHESIS OF GPI-ANCHORED PROTEINS%REACTOME%R-HSA-163125.2		23	-0.185792	-0.664903	0.893805	1	1	1331	tags=48%, list=43%, signal=83%
GLAND DEVELOPMENT%GOBP%GO:0048732	GLAND DEVELOPMENT%GOBP%GO:0048732		27	-0.178891	-0.662829	0.874865	1	1	365	tags=15%, list=12%, signal=17%
REPRODUCTIVE PROCESS%GOBP%GO:0022414	REPRODUCTIVE PROCESS%GOBP%GO:0022414		84	-0.148248	-0.661376	0.934608	1	1	1034	tags=30%, list=33%, signal=43%
REGULATION OF PROTEOLYSIS%GOBP%GO:0030162	REGULATION OF PROTEOLYSIS%GOBP%GO:0030162		101	-0.146628	-0.661304	0.940704	1	1	1288	tags=39%, list=41%, signal=64%
KIDNEY EPITHELIUM DEVELOPMENT%GOBP%GO:0072073	KIDNEY EPITHELIUM DEVELOPMENT%GOBP%GO:0072073		19	-0.194111	-0.660324	0.86689	1	1	1860	tags=68%, list=60%, signal=169%
REGULATION OF TOLL-LIKE RECEPTOR SIGNALING PATHWAY%GOBP%GO:0034121	REGULATION OF TOLL-LIKE RECEPTOR SIGNALING PATHWAY%GOBP%GO:0034121		15	-0.207088	-0.659738	0.844444	1	1	1933	tags=73%, list=62%, signal=192%
PURINE RIBONUCLEOTIDE BIOSYNTHETIC PROCESS%GOBP%GO:0009152	PURINE RIBONUCLEOTIDE BIOSYNTHETIC PROCESS%GOBP%GO:0009152		23	-0.185773	-0.65926	0.889746	1	1	1422	tags=43%, list=46%, signal=79%
VALIDATED TRANSCRIPTIONAL TARGETS OF AP1 FAMILY MEMBERS FRA1 AND FRA2%PATHWAY INTERACTION DATABASE NCI-NATURE CURATED DATA%VALIDATED TRANSCRIPTIONAL TARGETS OF AP1 FAMILY MEMBERS FRA1 AND FRA2	VALIDATED TRANSCRIPTIONAL TARGETS OF AP1 FAMILY MEMBERS FRA1 AND FRA2%PATHWAY INTERACTION DATABASE NCI-NATURE CURATED DATA%VALIDATED TRANSCRIPTIONAL TARGETS OF AP1 FAMILY MEMBERS FRA1 AND FRA2		15	-0.206304	-0.658353	0.873821	1	1	1493	tags=60%, list=48%, signal=115%
DEVELOPMENTAL PROCESS INVOLVED IN REPRODUCTION%GOBP%GO:0003006	DEVELOPMENTAL PROCESS INVOLVED IN REPRODUCTION%GOBP%GO:0003006		41	-0.166329	-0.65746	0.894737	1	1	389	tags=15%, list=12%, signal=17%
RIBONUCLEOTIDE BIOSYNTHETIC PROCESS%GOBP%GO:0009260	RIBONUCLEOTIDE BIOSYNTHETIC PROCESS%GOBP%GO:0009260		23	-0.185773	-0.656659	0.876975	1	1	1422	tags=43%, list=46%, signal=79%
PID_FRA_PATHWAY%MSIGDB_C2%PID_FRA_PATHWAY	PID_FRA_PATHWAY%MSIGDB_C2%PID_FRA_PATHWAY		15	-0.206304	-0.656458	0.87748	1	1	1493	tags=60%, list=48%, signal=115%
REGULATION OF SMOOTH MUSCLE CELL MIGRATION%GOBP%GO:0014910	REGULATION OF SMOOTH MUSCLE CELL MIGRATION%GOBP%GO:0014910		15	-0.207254	-0.655639	0.872242	1	1	559	tags=20%, list=18%, signal=24%
NEGATIVE REGULATION OF MULTI-ORGANISM PROCESS%GOBP%GO:0043901	NEGATIVE REGULATION OF MULTI-ORGANISM PROCESS%GOBP%GO:0043901		17	-0.203737	-0.654411	0.884571	1	1	552	tags=24%, list=18%, signal=28%
PURINE NUCLEOTIDE BIOSYNTHETIC PROCESS%GOBP%GO:0006164	PURINE NUCLEOTIDE BIOSYNTHETIC PROCESS%GOBP%GO:0006164		23	-0.185773	-0.652243	0.874024	1	1	1422	tags=43%, list=46%, signal=79%
NEGATIVE REGULATION OF BIOSYNTHETIC PROCESS%GOBP%GO:0009890	NEGATIVE REGULATION OF BIOSYNTHETIC PROCESS%GOBP%GO:0009890		168	-0.135991	-0.649822	0.975976	1	1	1309	tags=36%, list=42%, signal=59%
REGULATION OF PROTEIN KINASE ACTIVITY%GOBP%GO:0045859	REGULATION OF PROTEIN KINASE ACTIVITY%GOBP%GO:0045859		124	-0.13994	-0.649054	0.961809	1	1	750	tags=22%, list=24%, signal=28%
REGULATION OF CYTOKINE PRODUCTION INVOLVED IN IMMUNE RESPONSE%GOBP%GO:0002718	REGULATION OF CYTOKINE PRODUCTION INVOLVED IN IMMUNE RESPONSE%GOBP%GO:0002718		17	-0.195416	-0.648976	0.907407	1	1	1360	tags=47%, list=44%, signal=83%
GENE EXPRESSION%GOBP%GO:0010467	GENE EXPRESSION%GOBP%GO:0010467		89	-0.144619	-0.645596	0.942482	1	1	401	tags=13%, list=13%, signal=15%
NEGATIVE REGULATION OF APOPTOTIC SIGNALING PATHWAY%GOBP%GO:2001234	NEGATIVE REGULATION OF APOPTOTIC SIGNALING PATHWAY%GOBP%GO:2001234		26	-0.177455	-0.645371	0.89693	1	1	141	tags=12%, list=5%, signal=12%
ASSEMBLY OF COLLAGEN FIBRILS AND OTHER MULTIMERIC STRUCTURES%REACTOME%R-HSA-2022090.3	ASSEMBLY OF COLLAGEN FIBRILS AND OTHER MULTIMERIC STRUCTURES%REACTOME%R-HSA-2022090.3		27	-0.176573	-0.64407	0.881449	1	1	2097	tags=78%, list=67%, signal=236%
COFACTOR METABOLIC PROCESS%GOBP%GO:0051186	COFACTOR METABOLIC PROCESS%GOBP%GO:0051186		61	-0.151249	-0.642802	0.938838	1	1	221	tags=10%, list=7%, signal=10%
POST-TRANSLATIONAL PROTEIN MODIFICATION%REACTOME%R-HSA-597592.7	POST-TRANSLATIONAL PROTEIN MODIFICATION%REACTOME%R-HSA-597592.7		150	-0.137704	-0.642557	0.96493	1	1	1357	tags=38%, list=44%, signal=64%
NON-CANONICAL WNT SIGNALING PATHWAY%GOBP%GO:0035567	NON-CANONICAL WNT SIGNALING PATHWAY%GOBP%GO:0035567		16	-0.193765	-0.640177	0.878966	1	1	1044	tags=31%, list=33%, signal=47%
CONSTITUTIVE SIGNALING BY ABERRANT PI3K IN CANCER%REACTOME%R-HSA-2219530.1	CONSTITUTIVE SIGNALING BY ABERRANT PI3K IN CANCER%REACTOME%R-HSA-2219530.1		19	-0.190377	-0.637637	0.903226	1	1	1542	tags=63%, list=49%, signal=124%
ORGANELLE ORGANIZATION%GOBP%GO:0006996	ORGANELLE ORGANIZATION%GOBP%GO:0006996		344	-0.130291	-0.637517	0.994	1	1	587	tags=15%, list=19%, signal=17%
REGULATION OF NUCLEOBASE-CONTAINING COMPOUND METABOLIC PROCESS%GOBP%GO:0019219	REGULATION OF NUCLEOBASE-CONTAINING COMPOUND METABOLIC PROCESS%GOBP%GO:0019219		402	-0.129128	-0.637398	0.999	1	1	1313	tags=36%, list=42%, signal=54%
CELL PROLIFERATION%GOBP%GO:0008283	CELL PROLIFERATION%GOBP%GO:0008283		66	-0.147882	-0.637347	0.923625	1	1	560	tags=20%, list=18%, signal=24%
CELL SURFACE RECEPTOR SIGNALING PATHWAY INVOLVED IN CELL-CELL SIGNALING%GOBP%GO:1905114	CELL SURFACE RECEPTOR SIGNALING PATHWAY INVOLVED IN CELL-CELL SIGNALING%GOBP%GO:1905114		43	-0.155131	-0.635104	0.892632	1	1	1148	tags=33%, list=37%, signal=51%
RESPONSE TO TOPOLOGICALLY INCORRECT PROTEIN%GOBP%GO:0035966	RESPONSE TO TOPOLOGICALLY INCORRECT PROTEIN%GOBP%GO:0035966		15	-0.200819	-0.635028	0.892398	1	1	25	tags=7%, list=1%, signal=7%
REGULATION OF CELLULAR MACROMOLECULE BIOSYNTHETIC PROCESS%GOBP%GO:2000112	REGULATION OF CELLULAR MACROMOLECULE BIOSYNTHETIC PROCESS%GOBP%GO:2000112		387	-0.129538	-0.633788	1	1	1	1313	tags=36%, list=42%, signal=54%
REPRODUCTION%GOBP%GO:0000003	REPRODUCTION%GOBP%GO:0000003		85	-0.143179	-0.633024	0.947581	1	1	1034	tags=29%, list=33%, signal=43%
CELLULAR PROTEIN METABOLIC PROCESS%GOBP%GO:0044267	CELLULAR PROTEIN METABOLIC PROCESS%GOBP%GO:0044267		336	-0.129281	-0.632323	0.996	1	1	487	tags=15%, list=16%, signal=15%
ALCOHOL METABOLIC PROCESS%GOBP%GO:0006066	ALCOHOL METABOLIC PROCESS%GOBP%GO:0006066		43	-0.157283	-0.632264	0.930785	1	1	488	tags=16%, list=16%, signal=19%
WNT SIGNALING%WIKIPATHWAYS_20200510%WP428%HOMO SAPIENS	WNT SIGNALING%WIKIPATHWAYS_20200510%WP428%HOMO SAPIENS		33	-0.163294	-0.629965	0.904963	1	1	545	tags=18%, list=17%, signal=22%
REGULATION OF RNA BIOSYNTHETIC PROCESS%GOBP%GO:2001141	REGULATION OF RNA BIOSYNTHETIC PROCESS%GOBP%GO:2001141		355	-0.128339	-0.628865	0.999	1	1	1313	tags=36%, list=42%, signal=55%
REGULATION OF LIPID METABOLIC PROCESS%GOBP%GO:0019216	REGULATION OF LIPID METABOLIC PROCESS%GOBP%GO:0019216		63	-0.14544	-0.62846	0.925101	1	1	925	tags=25%, list=30%, signal=35%
REGULATION OF CANONICAL WNT SIGNALING PATHWAY%GOBP%GO:0060828	REGULATION OF CANONICAL WNT SIGNALING PATHWAY%GOBP%GO:0060828		40	-0.154972	-0.62672	0.912134	1	1	895	tags=28%, list=29%, signal=38%
SIGNALING BY VEGF%REACTOME%R-HSA-194138.2	SIGNALING BY VEGF%REACTOME%R-HSA-194138.2		26	-0.17254	-0.625888	0.915939	1	1	1973	tags=69%, list=63%, signal=187%
REGULATION OF CELLULAR PROTEIN METABOLIC PROCESS%GOBP%GO:0032268	REGULATION OF CELLULAR PROTEIN METABOLIC PROCESS%GOBP%GO:0032268		358	-0.127469	-0.625709	0.997	1	1	1319	tags=37%, list=42%, signal=57%
SENSORY ORGAN MORPHOGENESIS%GOBP%GO:0090596	SENSORY ORGAN MORPHOGENESIS%GOBP%GO:0090596		22	-0.179609	-0.625327	0.90989	1	1	1938	tags=68%, list=62%, signal=179%
COENZYME METABOLIC PROCESS%GOBP%GO:0006732	COENZYME METABOLIC PROCESS%GOBP%GO:0006732		39	-0.156556	-0.625133	0.92163	1	1	1317	tags=36%, list=42%, signal=61%
ORGANIC CYCLIC COMPOUND CATABOLIC PROCESS%GOBP%GO:1901361	ORGANIC CYCLIC COMPOUND CATABOLIC PROCESS%GOBP%GO:1901361		47	-0.152969	-0.623553	0.923947	1	1	2068	tags=68%, list=66%, signal=199%
REGULATION OF RNA METABOLIC PROCESS%GOBP%GO:0051252	REGULATION OF RNA METABOLIC PROCESS%GOBP%GO:0051252		373	-0.126854	-0.623106	0.998	1	1	1313	tags=36%, list=42%, signal=55%
ACTIVATION OF INNATE IMMUNE RESPONSE%GOBP%GO:0002218	ACTIVATION OF INNATE IMMUNE RESPONSE%GOBP%GO:0002218		40	-0.158005	-0.622363	0.917623	1	1	1458	tags=52%, list=47%, signal=97%
MEMORY%GOBP%GO:0007613	MEMORY%GOBP%GO:0007613		18	-0.187606	-0.621538	0.9	1	1	1312	tags=44%, list=42%, signal=76%
HALLMARK_UV_RESPONSE_UP%MSIGDB_C2%HALLMARK_UV_RESPONSE_UP	HALLMARK_UV_RESPONSE_UP%MSIGDB_C2%HALLMARK_UV_RESPONSE_UP		27	-0.166338	-0.620809	0.919604	1	1	1607	tags=48%, list=52%, signal=99%
NUCLEOTIDE BIOSYNTHETIC PROCESS%GOBP%GO:0009165	NUCLEOTIDE BIOSYNTHETIC PROCESS%GOBP%GO:0009165		33	-0.163235	-0.618563	0.928034	1	1	1069	tags=30%, list=34%, signal=46%
REGULATION OF TRANSCRIPTION, DNA-TEMPLATED%GOBP%GO:0006355	REGULATION OF TRANSCRIPTION, DNA-TEMPLATED%GOBP%GO:0006355		353	-0.126965	-0.618457	0.997	1	1	1313	tags=36%, list=42%, signal=55%
TRANSITION METAL ION HOMEOSTASIS%GOBP%GO:0055076	TRANSITION METAL ION HOMEOSTASIS%GOBP%GO:0055076		20	-0.180135	-0.617658	0.910414	1	1	2099	tags=85%, list=67%, signal=259%
NUCLEOSIDE PHOSPHATE BIOSYNTHETIC PROCESS%GOBP%GO:1901293	NUCLEOSIDE PHOSPHATE BIOSYNTHETIC PROCESS%GOBP%GO:1901293		33	-0.163235	-0.617496	0.923983	1	1	1069	tags=30%, list=34%, signal=46%
REGULATION OF NUCLEIC ACID-TEMPLATED TRANSCRIPTION%GOBP%GO:1903506	REGULATION OF NUCLEIC ACID-TEMPLATED TRANSCRIPTION%GOBP%GO:1903506		354	-0.126153	-0.616546	0.998	1	1	1313	tags=36%, list=42%, signal=55%
VEGFA-VEGFR2 PATHWAY%REACTOME DATABASE ID RELEASE 72%4420097	VEGFA-VEGFR2 PATHWAY%REACTOME DATABASE ID RELEASE 72%4420097		23	-0.171547	-0.61644	0.91343	1	1	1973	tags=70%, list=63%, signal=188%
NEGATIVE REGULATION OF CELLULAR CATABOLIC PROCESS%GOBP%GO:0031330	NEGATIVE REGULATION OF CELLULAR CATABOLIC PROCESS%GOBP%GO:0031330		21	-0.176991	-0.61634	0.907135	1	1	1053	tags=33%, list=34%, signal=50%
CEREBRAL CORTEX DEVELOPMENT%GOBP%GO:0021987	CEREBRAL CORTEX DEVELOPMENT%GOBP%GO:0021987		15	-0.194249	-0.615409	0.900352	1	1	1666	tags=53%, list=53%, signal=114%
REGULATION OF CELLULAR PROTEIN LOCALIZATION%GOBP%GO:1903827	REGULATION OF CELLULAR PROTEIN LOCALIZATION%GOBP%GO:1903827		60	-0.146804	-0.614815	0.964467	1	1	1328	tags=35%, list=43%, signal=60%
VEGFA-VEGFR2 SIGNALING PATHWAY%WIKIPATHWAYS_20200510%WP3888%HOMO SAPIENS	VEGFA-VEGFR2 SIGNALING PATHWAY%WIKIPATHWAYS_20200510%WP3888%HOMO SAPIENS		90	-0.137132	-0.614161	0.954315	1	1	1523	tags=42%, list=49%, signal=80%
ORGANONITROGEN COMPOUND BIOSYNTHETIC PROCESS%GOBP%GO:1901566	ORGANONITROGEN COMPOUND BIOSYNTHETIC PROCESS%GOBP%GO:1901566		148	-0.131462	-0.611654	0.981964	1	1	880	tags=23%, list=28%, signal=30%
CARBOHYDRATE BIOSYNTHETIC PROCESS%GOBP%GO:0016051	CARBOHYDRATE BIOSYNTHETIC PROCESS%GOBP%GO:0016051		18	-0.183802	-0.611108	0.915909	1	1	732	tags=22%, list=23%, signal=29%
REGULATION OF CELLULAR KETONE METABOLIC PROCESS%GOBP%GO:0010565	REGULATION OF CELLULAR KETONE METABOLIC PROCESS%GOBP%GO:0010565		20	-0.177045	-0.610092	0.917492	1	1	358	tags=15%, list=11%, signal=17%
CELLULAR MACROMOLECULE LOCALIZATION%GOBP%GO:0070727	CELLULAR MACROMOLECULE LOCALIZATION%GOBP%GO:0070727		134	-0.13097	-0.606305	0.980943	1	1	272	tags=9%, list=9%, signal=9%
NEURAL CREST DIFFERENTIATION%WIKIPATHWAYS_20200510%WP2064%HOMO SAPIENS	NEURAL CREST DIFFERENTIATION%WIKIPATHWAYS_20200510%WP2064%HOMO SAPIENS		20	-0.180115	-0.605132	0.924122	1	1	1316	tags=40%, list=42%, signal=69%
ESC PLURIPOTENCY PATHWAYS%WIKIPATHWAYS_20200510%WP3931%HOMO SAPIENS	ESC PLURIPOTENCY PATHWAYS%WIKIPATHWAYS_20200510%WP3931%HOMO SAPIENS		28	-0.163859	-0.605023	0.917031	1	1	409	tags=14%, list=13%, signal=16%
CELLULAR PROTEIN LOCALIZATION%GOBP%GO:0034613	CELLULAR PROTEIN LOCALIZATION%GOBP%GO:0034613		134	-0.13097	-0.601294	0.975952	1	1	272	tags=9%, list=9%, signal=9%
RESPONSE TO STEROID HORMONE%GOBP%GO:0048545	RESPONSE TO STEROID HORMONE%GOBP%GO:0048545		27	-0.164532	-0.600859	0.928416	1	1	302	tags=11%, list=10%, signal=12%
GASTRIN_CCK2R_240212%PANTHER PATHWAY%P06959	GASTRIN_CCK2R_240212%PANTHER PATHWAY%P06959		27	-0.16315	-0.597509	0.910088	1	1	1991	tags=67%, list=64%, signal=183%
REGULATION OF INNATE IMMUNE RESPONSE%GOBP%GO:0045088	REGULATION OF INNATE IMMUNE RESPONSE%GOBP%GO:0045088		74	-0.134963	-0.597434	0.957576	1	1	1373	tags=43%, list=44%, signal=75%
ORGANONITROGEN COMPOUND CATABOLIC PROCESS%GOBP%GO:1901565	ORGANONITROGEN COMPOUND CATABOLIC PROCESS%GOBP%GO:1901565		122	-0.129534	-0.597166	0.980943	1	1	1617	tags=45%, list=52%, signal=90%
PROTEIN-CONTAINING COMPLEX SUBUNIT ORGANIZATION%GOBP%GO:0043933	PROTEIN-CONTAINING COMPLEX SUBUNIT ORGANIZATION%GOBP%GO:0043933		138	-0.129065	-0.595027	0.98497	1	1	894	tags=23%, list=29%, signal=31%
NABA_ECM_REGULATORS%MSIGDB_C2%NABA_ECM_REGULATORS	NABA_ECM_REGULATORS%MSIGDB_C2%NABA_ECM_REGULATORS		70	-0.135662	-0.593383	0.956256	1	1	367	tags=14%, list=12%, signal=16%
REGULATION OF DNA-BINDING TRANSCRIPTION FACTOR ACTIVITY%GOBP%GO:0051090	REGULATION OF DNA-BINDING TRANSCRIPTION FACTOR ACTIVITY%GOBP%GO:0051090		69	-0.137868	-0.591193	0.959184	1	1	1654	tags=49%, list=53%, signal=103%
POSITIVE REGULATION OF DNA-BINDING TRANSCRIPTION FACTOR ACTIVITY%GOBP%GO:0051091	POSITIVE REGULATION OF DNA-BINDING TRANSCRIPTION FACTOR ACTIVITY%GOBP%GO:0051091		41	-0.15098	-0.590624	0.938025	1	1	1427	tags=46%, list=46%, signal=84%
SIGNALING BY RHO GTPASES%REACTOME%R-HSA-194315.4	SIGNALING BY RHO GTPASES%REACTOME%R-HSA-194315.4		83	-0.13337	-0.590216	0.959473	1	1	178	tags=8%, list=6%, signal=9%
REGULATION OF WNT SIGNALING PATHWAY%GOBP%GO:0030111	REGULATION OF WNT SIGNALING PATHWAY%GOBP%GO:0030111		55	-0.142687	-0.588302	0.946281	1	1	1856	tags=60%, list=60%, signal=146%
CLATHRIN-MEDIATED ENDOCYTOSIS%REACTOME DATABASE ID RELEASE 72%8856828	CLATHRIN-MEDIATED ENDOCYTOSIS%REACTOME DATABASE ID RELEASE 72%8856828		29	-0.158853	-0.587848	0.945102	1	1	991	tags=31%, list=32%, signal=45%
PROTEIN MODIFICATION PROCESS%GOBP%GO:0036211	PROTEIN MODIFICATION PROCESS%GOBP%GO:0036211		292	-0.120227	-0.585555	0.993	1	1	751	tags=20%, list=24%, signal=24%
VESICLE ORGANIZATION%GOBP%GO:0016050	VESICLE ORGANIZATION%GOBP%GO:0016050		31	-0.15763	-0.585377	0.9381	1	1	484	tags=16%, list=16%, signal=19%
IL3%NETPATH%IL3	IL3%NETPATH%IL3		16	-0.182279	-0.584503	0.927586	1	1	1973	tags=69%, list=63%, signal=186%
CELLULAR LIPID METABOLIC PROCESS%GOBP%GO:0044255	CELLULAR LIPID METABOLIC PROCESS%GOBP%GO:0044255		129	-0.124909	-0.581023	0.982949	1	1	568	tags=16%, list=18%, signal=19%
POSITIVE REGULATION OF CATABOLIC PROCESS%GOBP%GO:0009896	POSITIVE REGULATION OF CATABOLIC PROCESS%GOBP%GO:0009896		42	-0.143208	-0.580981	0.945663	1	1	111	tags=7%, list=4%, signal=7%
CELLULAR PROTEIN MODIFICATION PROCESS%GOBP%GO:0006464	CELLULAR PROTEIN MODIFICATION PROCESS%GOBP%GO:0006464		292	-0.120227	-0.580486	0.997	1	1	751	tags=20%, list=24%, signal=24%
CATABOLIC PROCESS%GOBP%GO:0009056	CATABOLIC PROCESS%GOBP%GO:0009056		204	-0.120625	-0.580038	0.996	1	1	534	tags=15%, list=17%, signal=17%
REGULATION OF KINASE ACTIVITY%GOBP%GO:0043549	REGULATION OF KINASE ACTIVITY%GOBP%GO:0043549		144	-0.124748	-0.57964	0.987988	1	1	1312	tags=36%, list=42%, signal=59%
MACROMOLECULE MODIFICATION%GOBP%GO:0043412	MACROMOLECULE MODIFICATION%GOBP%GO:0043412		300	-0.119378	-0.579047	0.998	1	1	751	tags=20%, list=24%, signal=24%
NEGATIVE REGULATION OF CELL DEATH%GOBP%GO:0060548	NEGATIVE REGULATION OF CELL DEATH%GOBP%GO:0060548		118	-0.124642	-0.575402	0.976977	1	1	637	tags=19%, list=20%, signal=23%
CELLULAR RESPONSE TO EXTERNAL STIMULUS%GOBP%GO:0071496	CELLULAR RESPONSE TO EXTERNAL STIMULUS%GOBP%GO:0071496		42	-0.140934	-0.573919	0.949791	1	1	1050	tags=29%, list=34%, signal=43%
POSITIVE REGULATION OF CELL DEATH%GOBP%GO:0010942	POSITIVE REGULATION OF CELL DEATH%GOBP%GO:0010942		102	-0.125967	-0.569903	0.977934	1	1	1624	tags=46%, list=52%, signal=93%
RESPONSE TO RADIATION%GOBP%GO:0009314	RESPONSE TO RADIATION%GOBP%GO:0009314		30	-0.153037	-0.569375	0.946912	1	1	865	tags=27%, list=28%, signal=37%
REGULATION OF CELL DEATH%GOBP%GO:0010941	REGULATION OF CELL DEATH%GOBP%GO:0010941		221	-0.119268	-0.569362	0.994995	1	1	1878	tags=57%, list=60%, signal=134%
MACROMOLECULE LOCALIZATION%GOBP%GO:0033036	MACROMOLECULE LOCALIZATION%GOBP%GO:0033036		205	-0.119762	-0.567757	0.996	1	1	272	tags=9%, list=9%, signal=9%
RIBOSE PHOSPHATE BIOSYNTHETIC PROCESS%GOBP%GO:0046390	RIBOSE PHOSPHATE BIOSYNTHETIC PROCESS%GOBP%GO:0046390		25	-0.160718	-0.567169	0.936737	1	1	1422	tags=40%, list=46%, signal=73%
LIPID METABOLIC PROCESS%GOBP%GO:0006629	LIPID METABOLIC PROCESS%GOBP%GO:0006629		160	-0.120508	-0.566141	0.994995	1	1	1093	tags=28%, list=35%, signal=41%
PROTEIN COMPLEX OLIGOMERIZATION%GOBP%GO:0051259	PROTEIN COMPLEX OLIGOMERIZATION%GOBP%GO:0051259		21	-0.161917	-0.564497	0.946833	1	1	1454	tags=43%, list=47%, signal=80%
CELLULAR MACROMOLECULE METABOLIC PROCESS%GOBP%GO:0044260	CELLULAR MACROMOLECULE METABOLIC PROCESS%GOBP%GO:0044260		437	-0.113523	-0.560647	1	1	1	487	tags=14%, list=16%, signal=14%
TRANSPORT OF INORGANIC CATIONS ANIONS AND AMINO ACIDS OLIGOPEPTIDES%REACTOME%R-HSA-425393.2	TRANSPORT OF INORGANIC CATIONS ANIONS AND AMINO ACIDS OLIGOPEPTIDES%REACTOME%R-HSA-425393.2		18	-0.166873	-0.559108	0.946833	1	1	1765	tags=61%, list=57%, signal=140%
PROTEIN UBIQUITINATION%GOBP%GO:0016567	PROTEIN UBIQUITINATION%GOBP%GO:0016567		33	-0.145522	-0.557879	0.957627	1	1	282	tags=9%, list=9%, signal=10%
CELL-CELL SIGNALING BY WNT%GOBP%GO:0198738	CELL-CELL SIGNALING BY WNT%GOBP%GO:0198738		37	-0.142068	-0.555228	0.955272	1	1	273	tags=11%, list=9%, signal=12%
CYTOKINE PRODUCTION%GOBP%GO:0001816	CYTOKINE PRODUCTION%GOBP%GO:0001816		25	-0.153509	-0.554811	0.96179	1	1	1510	tags=52%, list=48%, signal=100%
ESTABLISHMENT OF ORGANELLE LOCALIZATION%GOBP%GO:0051656	ESTABLISHMENT OF ORGANELLE LOCALIZATION%GOBP%GO:0051656		52	-0.13343	-0.554328	0.964176	1	1	484	tags=15%, list=16%, signal=18%
CELLULAR TRANSITION METAL ION HOMEOSTASIS%GOBP%GO:0046916	CELLULAR TRANSITION METAL ION HOMEOSTASIS%GOBP%GO:0046916		18	-0.168903	-0.553799	0.955275	1	1	2099	tags=83%, list=67%, signal=254%
WNT SIGNALING PATHWAY%GOBP%GO:0016055	WNT SIGNALING PATHWAY%GOBP%GO:0016055		37	-0.142068	-0.552957	0.951579	1	1	273	tags=11%, list=9%, signal=12%
REGULATION OF VIRAL LIFE CYCLE%GOBP%GO:1903900	REGULATION OF VIRAL LIFE CYCLE%GOBP%GO:1903900		21	-0.160997	-0.551035	0.948661	1	1	552	tags=19%, list=18%, signal=23%
NEGATIVE REGULATION OF CELLULAR BIOSYNTHETIC PROCESS%GOBP%GO:0031327	NEGATIVE REGULATION OF CELLULAR BIOSYNTHETIC PROCESS%GOBP%GO:0031327		163	-0.116165	-0.550411	0.987	1	1	1309	tags=35%, list=42%, signal=57%
MORPHOGENESIS OF AN EPITHELIUM%GOBP%GO:0002009	MORPHOGENESIS OF AN EPITHELIUM%GOBP%GO:0002009		59	-0.131198	-0.548036	0.971429	1	1	243	tags=10%, list=8%, signal=11%
ORGANELLE LOCALIZATION%GOBP%GO:0051640	ORGANELLE LOCALIZATION%GOBP%GO:0051640		68	-0.126389	-0.547349	0.973577	1	1	484	tags=15%, list=16%, signal=17%
ORGANIC SUBSTANCE CATABOLIC PROCESS%GOBP%GO:1901575	ORGANIC SUBSTANCE CATABOLIC PROCESS%GOBP%GO:1901575		174	-0.114841	-0.54442	0.995996	1	1	269	tags=9%, list=9%, signal=10%
AMMONIUM ION METABOLIC PROCESS%GOBP%GO:0097164	AMMONIUM ION METABOLIC PROCESS%GOBP%GO:0097164		28	-0.146555	-0.541451	0.960912	1	1	740	tags=21%, list=24%, signal=28%
POSITIVE REGULATION OF CANONICAL WNT SIGNALING PATHWAY%GOBP%GO:0090263	POSITIVE REGULATION OF CANONICAL WNT SIGNALING PATHWAY%GOBP%GO:0090263		17	-0.16461	-0.54119	0.945412	1	1	607	tags=24%, list=19%, signal=29%
REGULATION OF VIRAL PROCESS%GOBP%GO:0050792	REGULATION OF VIRAL PROCESS%GOBP%GO:0050792		22	-0.154161	-0.5404	0.956044	1	1	552	tags=18%, list=18%, signal=22%
PROTEIN LOCALIZATION%GOBP%GO:0008104	PROTEIN LOCALIZATION%GOBP%GO:0008104		169	-0.1137	-0.539235	0.996	1	1	272	tags=8%, list=9%, signal=9%
NEGATIVE REGULATION OF GENE EXPRESSION%GOBP%GO:0010629	NEGATIVE REGULATION OF GENE EXPRESSION%GOBP%GO:0010629		178	-0.11326	-0.538794	0.995996	1	1	1309	tags=35%, list=42%, signal=58%
REGULATION OF CELL-MATRIX ADHESION%GOBP%GO:0001952	REGULATION OF CELL-MATRIX ADHESION%GOBP%GO:0001952		29	-0.144522	-0.535593	0.961956	1	1	273	tags=10%, list=9%, signal=11%
LIPID LOCALIZATION%GOBP%GO:0010876	LIPID LOCALIZATION%GOBP%GO:0010876		42	-0.133728	-0.534656	0.967044	1	1	497	tags=14%, list=16%, signal=17%
O-LINKED GLYCOSYLATION OF MUCINS%REACTOME%R-HSA-913709.3	O-LINKED GLYCOSYLATION OF MUCINS%REACTOME%R-HSA-913709.3		16	-0.163772	-0.531266	0.956419	1	1	1077	tags=31%, list=35%, signal=48%
REGULATION OF CELLULAR RESPONSE TO STRESS%GOBP%GO:0080135	REGULATION OF CELLULAR RESPONSE TO STRESS%GOBP%GO:0080135		79	-0.120473	-0.529443	0.978788	1	1	358	tags=11%, list=11%, signal=13%
REGULATION OF EMBRYONIC DEVELOPMENT%GOBP%GO:0045995	REGULATION OF EMBRYONIC DEVELOPMENT%GOBP%GO:0045995		18	-0.161488	-0.527392	0.961098	1	1	1462	tags=44%, list=47%, signal=83%
PLASMA MEMBRANE BOUNDED CELL PROJECTION ASSEMBLY%GOBP%GO:0120031	PLASMA MEMBRANE BOUNDED CELL PROJECTION ASSEMBLY%GOBP%GO:0120031		41	-0.132368	-0.525669	0.972746	1	1	1086	tags=27%, list=35%, signal=41%
PROTEIN HOMOOLIGOMERIZATION%GOBP%GO:0051260	PROTEIN HOMOOLIGOMERIZATION%GOBP%GO:0051260		16	-0.163914	-0.52524	0.95672	1	1	1454	tags=44%, list=47%, signal=82%
CELLULAR CATABOLIC PROCESS%GOBP%GO:0044248	CELLULAR CATABOLIC PROCESS%GOBP%GO:0044248		177	-0.109899	-0.524626	0.999	1	1	223	tags=8%, list=7%, signal=8%
POSITIVE REGULATION OF INTERLEUKIN-6 PRODUCTION%GOBP%GO:0032755	POSITIVE REGULATION OF INTERLEUKIN-6 PRODUCTION%GOBP%GO:0032755		16	-0.16023	-0.524468	0.97133	1	1	1233	tags=44%, list=40%, signal=72%
RECEPTOR METABOLIC PROCESS%GOBP%GO:0043112	RECEPTOR METABOLIC PROCESS%GOBP%GO:0043112		17	-0.161155	-0.524016	0.965076	1	1	272	tags=12%, list=9%, signal=13%
RIBONUCLEOTIDE METABOLIC PROCESS%GOBP%GO:0009259	RIBONUCLEOTIDE METABOLIC PROCESS%GOBP%GO:0009259		43	-0.128223	-0.523212	0.978034	1	1	1531	tags=42%, list=49%, signal=81%
AROMATIC COMPOUND CATABOLIC PROCESS%GOBP%GO:0019439	AROMATIC COMPOUND CATABOLIC PROCESS%GOBP%GO:0019439		37	-0.13282	-0.520028	0.975815	1	1	2068	tags=65%, list=66%, signal=190%
PROTEIN-CONTAINING COMPLEX ASSEMBLY%GOBP%GO:0065003	PROTEIN-CONTAINING COMPLEX ASSEMBLY%GOBP%GO:0065003		101	-0.115527	-0.51883	0.986882	1	1	249	tags=9%, list=8%, signal=9%
NEGATIVE REGULATION OF METABOLIC PROCESS%GOBP%GO:0009892	NEGATIVE REGULATION OF METABOLIC PROCESS%GOBP%GO:0009892		328	-0.105988	-0.51825	1	1	1	1319	tags=35%, list=42%, signal=54%
NEGATIVE REGULATION OF PROTEIN KINASE ACTIVITY%GOBP%GO:0006469	NEGATIVE REGULATION OF PROTEIN KINASE ACTIVITY%GOBP%GO:0006469		28	-0.140432	-0.517768	0.96875	1	1	405	tags=14%, list=13%, signal=16%
PROTEOLYSIS INVOLVED IN CELLULAR PROTEIN CATABOLIC PROCESS%GOBP%GO:0051603	PROTEOLYSIS INVOLVED IN CELLULAR PROTEIN CATABOLIC PROCESS%GOBP%GO:0051603		43	-0.127874	-0.516843	0.978216	1	1	53	tags=5%, list=2%, signal=5%
CILIUM ASSEMBLY%GOBP%GO:0060271	CILIUM ASSEMBLY%GOBP%GO:0060271		20	-0.15143	-0.515302	0.964405	1	1	984	tags=25%, list=32%, signal=36%
NEGATIVE REGULATION OF INNATE IMMUNE RESPONSE%GOBP%GO:0045824	NEGATIVE REGULATION OF INNATE IMMUNE RESPONSE%GOBP%GO:0045824		15	-0.161398	-0.514452	0.98	1	1	1287	tags=40%, list=41%, signal=68%
ORGANIC SUBSTANCE BIOSYNTHETIC PROCESS%GOBP%GO:1901576	ORGANIC SUBSTANCE BIOSYNTHETIC PROCESS%GOBP%GO:1901576		288	-0.106241	-0.513576	1	1	1	469	tags=12%, list=15%, signal=13%
PURINE RIBONUCLEOTIDE METABOLIC PROCESS%GOBP%GO:0009150	PURINE RIBONUCLEOTIDE METABOLIC PROCESS%GOBP%GO:0009150		43	-0.128223	-0.513571	0.979979	1	1	1531	tags=42%, list=49%, signal=81%
CELLULAR MACROMOLECULE CATABOLIC PROCESS%GOBP%GO:0044265	CELLULAR MACROMOLECULE CATABOLIC PROCESS%GOBP%GO:0044265		51	-0.123994	-0.512898	0.971134	1	1	129	tags=6%, list=4%, signal=6%
CARGO RECOGNITION FOR CLATHRIN-MEDIATED ENDOCYTOSIS%REACTOME%R-HSA-8856825.2	CARGO RECOGNITION FOR CLATHRIN-MEDIATED ENDOCYTOSIS%REACTOME%R-HSA-8856825.2		27	-0.139319	-0.511667	0.970779	1	1	991	tags=30%, list=32%, signal=43%
NEGATIVE REGULATION OF KINASE ACTIVITY%GOBP%GO:0033673	NEGATIVE REGULATION OF KINASE ACTIVITY%GOBP%GO:0033673		28	-0.140432	-0.511237	0.974194	1	1	405	tags=14%, list=13%, signal=16%
NEGATIVE REGULATION OF APOPTOTIC PROCESS%GOBP%GO:0043066	NEGATIVE REGULATION OF APOPTOTIC PROCESS%GOBP%GO:0043066		103	-0.110467	-0.50726	0.992979	1	1	637	tags=17%, list=20%, signal=21%
PROTEIN MODIFICATION BY SMALL PROTEIN CONJUGATION OR REMOVAL%GOBP%GO:0070647	PROTEIN MODIFICATION BY SMALL PROTEIN CONJUGATION OR REMOVAL%GOBP%GO:0070647		48	-0.123294	-0.505938	0.97314	1	1	282	tags=8%, list=9%, signal=9%
REGULATION OF TRANSFERASE ACTIVITY%GOBP%GO:0051338	REGULATION OF TRANSFERASE ACTIVITY%GOBP%GO:0051338		159	-0.107334	-0.504651	0.992993	1	1	750	tags=19%, list=24%, signal=24%
NEGATIVE REGULATION OF PROGRAMMED CELL DEATH%GOBP%GO:0043069	NEGATIVE REGULATION OF PROGRAMMED CELL DEATH%GOBP%GO:0043069		105	-0.111977	-0.504482	0.992979	1	1	1357	tags=37%, list=44%, signal=64%
PROTEIN GLYCOSYLATION%GOBP%GO:0006486	PROTEIN GLYCOSYLATION%GOBP%GO:0006486		24	-0.141725	-0.504408	0.971143	1	1	154	tags=8%, list=5%, signal=9%
NEGATIVE REGULATION OF MACROMOLECULE BIOSYNTHETIC PROCESS%GOBP%GO:0010558	NEGATIVE REGULATION OF MACROMOLECULE BIOSYNTHETIC PROCESS%GOBP%GO:0010558		160	-0.108459	-0.501001	0.994995	1	1	1309	tags=34%, list=42%, signal=56%
ENDOMEMBRANE SYSTEM ORGANIZATION%GOBP%GO:0010256	ENDOMEMBRANE SYSTEM ORGANIZATION%GOBP%GO:0010256		44	-0.122583	-0.495615	0.978328	1	1	4	tags=2%, list=0%, signal=2%
PURINE-CONTAINING COMPOUND BIOSYNTHETIC PROCESS%GOBP%GO:0072522	PURINE-CONTAINING COMPOUND BIOSYNTHETIC PROCESS%GOBP%GO:0072522		26	-0.136297	-0.494395	0.978142	1	1	1422	tags=38%, list=46%, signal=70%
REGULATION OF BINDING%GOBP%GO:0051098	REGULATION OF BINDING%GOBP%GO:0051098		48	-0.120576	-0.490593	0.986556	1	1	987	tags=25%, list=32%, signal=36%
POSITIVE REGULATION OF BINDING%GOBP%GO:0051099	POSITIVE REGULATION OF BINDING%GOBP%GO:0051099		18	-0.14874	-0.489368	0.980392	1	1	987	tags=28%, list=32%, signal=40%
PALLIUM DEVELOPMENT%GOBP%GO:0021543	PALLIUM DEVELOPMENT%GOBP%GO:0021543		19	-0.143299	-0.487994	0.965636	1	1	1666	tags=47%, list=53%, signal=101%
NITROGEN COMPOUND TRANSPORT%GOBP%GO:0071705	NITROGEN COMPOUND TRANSPORT%GOBP%GO:0071705		117	-0.10755	-0.487175	0.995984	1	1	1238	tags=32%, list=40%, signal=52%
GENERIC TRANSCRIPTION PATHWAY%REACTOME DATABASE ID RELEASE 72%212436	GENERIC TRANSCRIPTION PATHWAY%REACTOME DATABASE ID RELEASE 72%212436		117	-0.107557	-0.487058	0.99397	1	1	422	tags=11%, list=14%, signal=12%
BIOSYNTHETIC PROCESS%GOBP%GO:0009058	BIOSYNTHETIC PROCESS%GOBP%GO:0009058		294	-0.10087	-0.486589	1	1	1	469	tags=12%, list=15%, signal=13%
CYTOSKELETON-DEPENDENT INTRACELLULAR TRANSPORT%GOBP%GO:0030705	CYTOSKELETON-DEPENDENT INTRACELLULAR TRANSPORT%GOBP%GO:0030705		28	-0.130556	-0.485591	0.98913	1	1	484	tags=14%, list=16%, signal=17%
METABOLISM%REACTOME DATABASE ID RELEASE 72%1430728	METABOLISM%REACTOME DATABASE ID RELEASE 72%1430728		289	-0.100171	-0.485467	1	1	1	1434	tags=37%, list=46%, signal=63%
COFACTOR BIOSYNTHETIC PROCESS%GOBP%GO:0051188	COFACTOR BIOSYNTHETIC PROCESS%GOBP%GO:0051188		25	-0.135191	-0.485185	0.983749	1	1	1069	tags=28%, list=34%, signal=42%
ORGANIC SUBSTANCE TRANSPORT%GOBP%GO:0071702	ORGANIC SUBSTANCE TRANSPORT%GOBP%GO:0071702		159	-0.102896	-0.483441	0.995992	1	1	1238	tags=31%, list=40%, signal=50%
PURINE-CONTAINING COMPOUND METABOLIC PROCESS%GOBP%GO:0072521	PURINE-CONTAINING COMPOUND METABOLIC PROCESS%GOBP%GO:0072521		53	-0.116712	-0.482492	0.989659	1	1	1605	tags=43%, list=51%, signal=88%
REGULATION OF CYSTEINE-TYPE ENDOPEPTIDASE ACTIVITY INVOLVED IN APOPTOTIC PROCESS%GOBP%GO:0043281	REGULATION OF CYSTEINE-TYPE ENDOPEPTIDASE ACTIVITY INVOLVED IN APOPTOTIC PROCESS%GOBP%GO:0043281		24	-0.13667	-0.481895	0.984598	1	1	526	tags=17%, list=17%, signal=20%
GLYCOSYLATION%GOBP%GO:0070085	GLYCOSYLATION%GOBP%GO:0070085		26	-0.130972	-0.479792	0.980392	1	1	154	tags=8%, list=5%, signal=8%
RNA POLYMERASE II TRANSCRIPTION%REACTOME DATABASE ID RELEASE 72%73857	RNA POLYMERASE II TRANSCRIPTION%REACTOME DATABASE ID RELEASE 72%73857		119	-0.104027	-0.478321	0.994985	1	1	422	tags=11%, list=14%, signal=12%
MACROMOLECULE GLYCOSYLATION%GOBP%GO:0043413	MACROMOLECULE GLYCOSYLATION%GOBP%GO:0043413		25	-0.135075	-0.478286	0.984479	1	1	154	tags=8%, list=5%, signal=8%
APOPTOTIC SIGNALING PATHWAY%GOBP%GO:0097190	APOPTOTIC SIGNALING PATHWAY%GOBP%GO:0097190		35	-0.123354	-0.47299	0.98935	1	1	65	tags=6%, list=2%, signal=6%
PROTEIN SECRETION%GOBP%GO:0009306	PROTEIN SECRETION%GOBP%GO:0009306		19	-0.141059	-0.468435	0.985311	1	1	1207	tags=37%, list=39%, signal=60%
NEGATIVE REGULATION OF MACROMOLECULE METABOLIC PROCESS%GOBP%GO:0010605	NEGATIVE REGULATION OF MACROMOLECULE METABOLIC PROCESS%GOBP%GO:0010605		290	-0.0953756	-0.467217	1	1	1	1310	tags=34%, list=42%, signal=53%
NEGATIVE REGULATION OF TRANSFERASE ACTIVITY%GOBP%GO:0051348	NEGATIVE REGULATION OF TRANSFERASE ACTIVITY%GOBP%GO:0051348		31	-0.123097	-0.466639	0.99137	1	1	405	tags=13%, list=13%, signal=15%
CELLULAR RESPONSE TO INSULIN STIMULUS%GOBP%GO:0032869	CELLULAR RESPONSE TO INSULIN STIMULUS%GOBP%GO:0032869		17	-0.142107	-0.461112	0.986223	1	1	576	tags=18%, list=18%, signal=22%
COLLAGEN METABOLIC PROCESS%GOBP%GO:0032963	COLLAGEN METABOLIC PROCESS%GOBP%GO:0032963		16	-0.14272	-0.459817	0.987268	1	1	2097	tags=81%, list=67%, signal=247%
CELLULAR BIOSYNTHETIC PROCESS%GOBP%GO:0044249	CELLULAR BIOSYNTHETIC PROCESS%GOBP%GO:0044249		257	-0.0945514	-0.456993	1	1	1	223	tags=7%, list=7%, signal=7%
REGULATION OF STRESS-ACTIVATED PROTEIN KINASE SIGNALING CASCADE%GOBP%GO:0070302	REGULATION OF STRESS-ACTIVATED PROTEIN KINASE SIGNALING CASCADE%GOBP%GO:0070302		32	-0.118024	-0.453639	0.984914	1	1	275	tags=9%, list=9%, signal=10%
NEGATIVE REGULATION OF NUCLEOBASE-CONTAINING COMPOUND METABOLIC PROCESS%GOBP%GO:0045934	NEGATIVE REGULATION OF NUCLEOBASE-CONTAINING COMPOUND METABOLIC PROCESS%GOBP%GO:0045934		156	-0.0946954	-0.447004	0.998999	1	1	1309	tags=34%, list=42%, signal=56%
NEGATIVE REGULATION OF PHOSPHORUS METABOLIC PROCESS%GOBP%GO:0010563	NEGATIVE REGULATION OF PHOSPHORUS METABOLIC PROCESS%GOBP%GO:0010563		73	-0.102559	-0.446066	0.995955	1	1	405	tags=11%, list=13%, signal=12%
NEGATIVE REGULATION OF NITROGEN COMPOUND METABOLIC PROCESS%GOBP%GO:0051172	NEGATIVE REGULATION OF NITROGEN COMPOUND METABOLIC PROCESS%GOBP%GO:0051172		274	-0.0921757	-0.44595	1	1	1	1319	tags=34%, list=42%, signal=54%
PLASMA MEMBRANE ORGANIZATION%GOBP%GO:0007009	PLASMA MEMBRANE ORGANIZATION%GOBP%GO:0007009		23	-0.125949	-0.445615	0.994369	1	1	2050	tags=70%, list=66%, signal=202%
RNA METABOLIC PROCESS%GOBP%GO:0016070	RNA METABOLIC PROCESS%GOBP%GO:0016070		61	-0.105898	-0.445354	0.993878	1	1	358	tags=10%, list=11%, signal=11%
REGULATION OF EPITHELIAL CELL PROLIFERATION%GOBP%GO:0050678	REGULATION OF EPITHELIAL CELL PROLIFERATION%GOBP%GO:0050678		73	-0.101913	-0.445011	0.995972	1	1	1991	tags=64%, list=64%, signal=174%
CELLULAR NITROGEN COMPOUND METABOLIC PROCESS%GOBP%GO:0034641	CELLULAR NITROGEN COMPOUND METABOLIC PROCESS%GOBP%GO:0034641		245	-0.0917621	-0.444841	1	1	1	757	tags=17%, list=24%, signal=21%
REGULATION OF STRESS-ACTIVATED MAPK CASCADE%GOBP%GO:0032872	REGULATION OF STRESS-ACTIVATED MAPK CASCADE%GOBP%GO:0032872		32	-0.118024	-0.444251	0.990291	1	1	275	tags=9%, list=9%, signal=10%
NEGATIVE REGULATION OF PHOSPHATE METABOLIC PROCESS%GOBP%GO:0045936	NEGATIVE REGULATION OF PHOSPHATE METABOLIC PROCESS%GOBP%GO:0045936		73	-0.102559	-0.443913	0.99596	1	1	405	tags=11%, list=13%, signal=12%
POLYOL METABOLIC PROCESS%GOBP%GO:0019751	POLYOL METABOLIC PROCESS%GOBP%GO:0019751		18	-0.134227	-0.442999	0.993228	1	1	1542	tags=44%, list=49%, signal=87%
METABOLISM OF VITAMINS AND COFACTORS%REACTOME DATABASE ID RELEASE 72%196854	METABOLISM OF VITAMINS AND COFACTORS%REACTOME DATABASE ID RELEASE 72%196854		33	-0.115669	-0.441932	0.985991	1	1	507	tags=15%, list=16%, signal=18%
RESPONSE TO INSULIN%GOBP%GO:0032868	RESPONSE TO INSULIN%GOBP%GO:0032868		18	-0.133474	-0.437968	0.995429	1	1	576	tags=17%, list=18%, signal=20%
NEGATIVE REGULATION OF CELLULAR COMPONENT ORGANIZATION%GOBP%GO:0051129	NEGATIVE REGULATION OF CELLULAR COMPONENT ORGANIZATION%GOBP%GO:0051129		94	-0.0966565	-0.43763	0.99496	1	1	1288	tags=32%, list=41%, signal=53%
SIGNALING BY NOTCH%REACTOME DATABASE ID RELEASE 72%157118	SIGNALING BY NOTCH%REACTOME DATABASE ID RELEASE 72%157118		21	-0.127837	-0.436863	0.988802	1	1	1685	tags=48%, list=54%, signal=103%
RIBOSE PHOSPHATE METABOLIC PROCESS%GOBP%GO:0019693	RIBOSE PHOSPHATE METABOLIC PROCESS%GOBP%GO:0019693		46	-0.106638	-0.436837	0.991701	1	1	1531	tags=39%, list=49%, signal=76%
PEPTIDYL-AMINO ACID MODIFICATION%GOBP%GO:0018193	PEPTIDYL-AMINO ACID MODIFICATION%GOBP%GO:0018193		82	-0.0966724	-0.433609	0.996982	1	1	462	tags=12%, list=15%, signal=14%
REGULATION OF PROGRAMMED CELL DEATH%GOBP%GO:0043067	REGULATION OF PROGRAMMED CELL DEATH%GOBP%GO:0043067		199	-0.0895327	-0.428972	1	1	1	1878	tags=55%, list=60%, signal=129%
NUCLEOSIDE PHOSPHATE METABOLIC PROCESS%GOBP%GO:0006753	NUCLEOSIDE PHOSPHATE METABOLIC PROCESS%GOBP%GO:0006753		61	-0.100435	-0.427854	0.993846	1	1	1531	tags=38%, list=49%, signal=73%
NEGATIVE REGULATION OF PROTEIN METABOLIC PROCESS%GOBP%GO:0051248	NEGATIVE REGULATION OF PROTEIN METABOLIC PROCESS%GOBP%GO:0051248		140	-0.0917311	-0.426688	1	1	1	710	tags=17%, list=23%, signal=21%
GENE EXPRESSION (TRANSCRIPTION)%REACTOME DATABASE ID RELEASE 72%74160	GENE EXPRESSION (TRANSCRIPTION)%REACTOME DATABASE ID RELEASE 72%74160		126	-0.092317	-0.425966	0.998998	1	1	422	tags=10%, list=14%, signal=11%
TGF-BETA SIGNALING PATHWAY%PANTHER PATHWAY%P00052	TGF-BETA SIGNALING PATHWAY%PANTHER PATHWAY%P00052		15	-0.135397	-0.425719	0.997661	1	1	2698	tags=100%, list=87%, signal=740%
NEGATIVE REGULATION OF RNA METABOLIC PROCESS%GOBP%GO:0051253	NEGATIVE REGULATION OF RNA METABOLIC PROCESS%GOBP%GO:0051253		145	-0.0908539	-0.424655	1	1	1	1309	tags=34%, list=42%, signal=56%
NUCLEOTIDE METABOLIC PROCESS%GOBP%GO:0009117	NUCLEOTIDE METABOLIC PROCESS%GOBP%GO:0009117		61	-0.100435	-0.424051	0.993884	1	1	1531	tags=38%, list=49%, signal=73%
POSITIVE REGULATION OF CELLULAR CATABOLIC PROCESS%GOBP%GO:0031331	POSITIVE REGULATION OF CELLULAR CATABOLIC PROCESS%GOBP%GO:0031331		37	-0.106695	-0.423707	0.993671	1	1	918	tags=22%, list=29%, signal=30%
NEGATIVE REGULATION OF CELLULAR METABOLIC PROCESS%GOBP%GO:0031324	NEGATIVE REGULATION OF CELLULAR METABOLIC PROCESS%GOBP%GO:0031324		291	-0.0865856	-0.423264	1	1	1	1319	tags=33%, list=42%, signal=52%
PURINE NUCLEOTIDE METABOLIC PROCESS%GOBP%GO:0006163	PURINE NUCLEOTIDE METABOLIC PROCESS%GOBP%GO:0006163		46	-0.104184	-0.4224	0.990615	1	1	1531	tags=39%, list=49%, signal=76%
PROTEIN LOCALIZATION TO PLASMA MEMBRANE%GOBP%GO:0072659	PROTEIN LOCALIZATION TO PLASMA MEMBRANE%GOBP%GO:0072659		36	-0.108681	-0.420729	0.995785	1	1	272	tags=8%, list=9%, signal=9%
HALLMARK_APOPTOSIS%MSIGDB_C2%HALLMARK_APOPTOSIS	HALLMARK_APOPTOSIS%MSIGDB_C2%HALLMARK_APOPTOSIS		37	-0.106269	-0.418001	0.996798	1	1	1274	tags=32%, list=41%, signal=54%
RAS PROTEIN SIGNAL TRANSDUCTION%GOBP%GO:0007265	RAS PROTEIN SIGNAL TRANSDUCTION%GOBP%GO:0007265		40	-0.103356	-0.414384	0.996862	1	1	1113	tags=25%, list=36%, signal=38%
CARBOXYLIC ACID CATABOLIC PROCESS%GOBP%GO:0046395	CARBOXYLIC ACID CATABOLIC PROCESS%GOBP%GO:0046395		36	-0.105836	-0.411414	0.995708	1	1	1694	tags=50%, list=54%, signal=108%
ORGANIC ACID CATABOLIC PROCESS%GOBP%GO:0016054	ORGANIC ACID CATABOLIC PROCESS%GOBP%GO:0016054		36	-0.105836	-0.410467	0.994709	1	1	1694	tags=50%, list=54%, signal=108%
HALLMARK_TNFA_SIGNALING_VIA_NFKB%MSIGDB_C2%HALLMARK_TNFA_SIGNALING_VIA_NFKB	HALLMARK_TNFA_SIGNALING_VIA_NFKB%MSIGDB_C2%HALLMARK_TNFA_SIGNALING_VIA_NFKB		47	-0.0995962	-0.410266	0.996885	1	1	382	tags=11%, list=12%, signal=12%
REGULATION OF CATABOLIC PROCESS%GOBP%GO:0009894	REGULATION OF CATABOLIC PROCESS%GOBP%GO:0009894		80	-0.0933846	-0.409948	1	1	1	918	tags=21%, list=29%, signal=29%
REGULATION OF APOPTOTIC PROCESS%GOBP%GO:0042981	REGULATION OF APOPTOTIC PROCESS%GOBP%GO:0042981		197	-0.0860337	-0.408649	1	1	1	1878	tags=54%, list=60%, signal=128%
MEMBRANE DOCKING%GOBP%GO:0022406	MEMBRANE DOCKING%GOBP%GO:0022406		17	-0.122581	-0.401692	0.99883	1	1	1001	tags=24%, list=32%, signal=34%
NEGATIVE REGULATION OF BINDING%GOBP%GO:0051100	NEGATIVE REGULATION OF BINDING%GOBP%GO:0051100		32	-0.105445	-0.399779	0.996825	1	1	160	tags=6%, list=5%, signal=7%
ORGANOPHOSPHATE CATABOLIC PROCESS%GOBP%GO:0046434	ORGANOPHOSPHATE CATABOLIC PROCESS%GOBP%GO:0046434		22	-0.114249	-0.399133	0.993392	1	1	44	tags=5%, list=1%, signal=5%
NEGATIVE REGULATION OF PROTEIN MODIFICATION PROCESS%GOBP%GO:0031400	NEGATIVE REGULATION OF PROTEIN MODIFICATION PROCESS%GOBP%GO:0031400		77	-0.0893555	-0.391766	0.998987	1	1	475	tags=12%, list=15%, signal=13%
AMIDE TRANSPORT%GOBP%GO:0042886	AMIDE TRANSPORT%GOBP%GO:0042886		82	-0.0883619	-0.39116	0.997984	1	1	1238	tags=30%, list=40%, signal=49%
NEGATIVE REGULATION OF RNA BIOSYNTHETIC PROCESS%GOBP%GO:1902679	NEGATIVE REGULATION OF RNA BIOSYNTHETIC PROCESS%GOBP%GO:1902679		137	-0.0831689	-0.389186	1	1	1	1919	tags=56%, list=62%, signal=140%
NEGATIVE REGULATION OF NUCLEIC ACID-TEMPLATED TRANSCRIPTION%GOBP%GO:1903507	NEGATIVE REGULATION OF NUCLEIC ACID-TEMPLATED TRANSCRIPTION%GOBP%GO:1903507		137	-0.0831689	-0.388012	1	1	1	1919	tags=56%, list=62%, signal=140%
NEGATIVE REGULATION OF PROTEIN SERINE/THREONINE KINASE ACTIVITY%GOBP%GO:0071901	NEGATIVE REGULATION OF PROTEIN SERINE/THREONINE KINASE ACTIVITY%GOBP%GO:0071901		18	-0.115614	-0.38606	0.998845	1	1	1828	tags=61%, list=59%, signal=147%
NEGATIVE REGULATION OF TRANSCRIPTION, DNA-TEMPLATED%GOBP%GO:0045892	NEGATIVE REGULATION OF TRANSCRIPTION, DNA-TEMPLATED%GOBP%GO:0045892		137	-0.0831689	-0.384587	0.998998	1	1	1919	tags=56%, list=62%, signal=140%
POSITIVE REGULATION OF APOPTOTIC PROCESS%GOBP%GO:0043065	POSITIVE REGULATION OF APOPTOTIC PROCESS%GOBP%GO:0043065		90	-0.0863329	-0.382427	0.997992	1	1	1624	tags=43%, list=52%, signal=88%
SMALL GTPASE MEDIATED SIGNAL TRANSDUCTION%GOBP%GO:0007264	SMALL GTPASE MEDIATED SIGNAL TRANSDUCTION%GOBP%GO:0007264		44	-0.094754	-0.378714	0.996881	1	1	2757	tags=98%, list=88%, signal=834%
NEGATIVE REGULATION OF CELLULAR MACROMOLECULE BIOSYNTHETIC PROCESS%GOBP%GO:2000113	NEGATIVE REGULATION OF CELLULAR MACROMOLECULE BIOSYNTHETIC PROCESS%GOBP%GO:2000113		155	-0.0775874	-0.362853	1	1	1	1309	tags=32%, list=42%, signal=53%
POSITIVE REGULATION OF PROGRAMMED CELL DEATH%GOBP%GO:0043068	POSITIVE REGULATION OF PROGRAMMED CELL DEATH%GOBP%GO:0043068		91	-0.0806626	-0.35695	0.998992	1	1	1624	tags=43%, list=52%, signal=87%
NUCLEOBASE-CONTAINING SMALL MOLECULE METABOLIC PROCESS%GOBP%GO:0055086	NUCLEOBASE-CONTAINING SMALL MOLECULE METABOLIC PROCESS%GOBP%GO:0055086		78	-0.0807584	-0.355692	0.99899	1	1	1563	tags=37%, list=50%, signal=73%
CELLULAR RESPONSE TO EXTRACELLULAR STIMULUS%GOBP%GO:0031668	CELLULAR RESPONSE TO EXTRACELLULAR STIMULUS%GOBP%GO:0031668		32	-0.0924799	-0.351984	0.998927	1	1	827	tags=19%, list=27%, signal=25%
REGULATION OF CELLULAR CATABOLIC PROCESS%GOBP%GO:0031329	REGULATION OF CELLULAR CATABOLIC PROCESS%GOBP%GO:0031329		68	-0.0809424	-0.350114	1	1	1	918	tags=21%, list=29%, signal=29%
NEGATIVE REGULATION OF TRANSCRIPTION BY RNA POLYMERASE II%GOBP%GO:0000122	NEGATIVE REGULATION OF TRANSCRIPTION BY RNA POLYMERASE II%GOBP%GO:0000122		98	-0.072267	-0.328734	1	1	1	1919	tags=54%, list=62%, signal=136%
NEGATIVE REGULATION OF CELLULAR PROTEIN METABOLIC PROCESS%GOBP%GO:0032269	NEGATIVE REGULATION OF CELLULAR PROTEIN METABOLIC PROCESS%GOBP%GO:0032269		122	-0.0718234	-0.32705	0.998998	1	1	1310	tags=32%, list=42%, signal=53%
NEGATIVE REGULATION OF PROTEIN PHOSPHORYLATION%GOBP%GO:0001933	NEGATIVE REGULATION OF PROTEIN PHOSPHORYLATION%GOBP%GO:0001933		60	-0.0773002	-0.324103	1	1	1	405	tags=10%, list=13%, signal=11%
NEGATIVE REGULATION OF PHOSPHORYLATION%GOBP%GO:0042326	NEGATIVE REGULATION OF PHOSPHORYLATION%GOBP%GO:0042326		62	-0.0737356	-0.311424	1	1	1	405	tags=10%, list=13%, signal=11%
REGULATION OF PROTEIN CATABOLIC PROCESS%GOBP%GO:0042176	REGULATION OF PROTEIN CATABOLIC PROCESS%GOBP%GO:0042176		40	-0.0732017	-0.292646	0.997892	1	1	918	tags=20%, list=29%, signal=28%
ORGANIC CYCLIC COMPOUND BIOSYNTHETIC PROCESS%GOBP%GO:1901362	ORGANIC CYCLIC COMPOUND BIOSYNTHETIC PROCESS%GOBP%GO:1901362		126	-0.0583064	-0.271973	1	1	1	859	tags=17%, list=28%, signal=23%
AROMATIC COMPOUND BIOSYNTHETIC PROCESS%GOBP%GO:0019438	AROMATIC COMPOUND BIOSYNTHETIC PROCESS%GOBP%GO:0019438		102	-0.0515553	-0.235077	1	0.999999	1	1954	tags=52%, list=63%, signal=135%
NUCLEOBASE-CONTAINING COMPOUND METABOLIC PROCESS%GOBP%GO:0006139	NUCLEOBASE-CONTAINING COMPOUND METABOLIC PROCESS%GOBP%GO:0006139		175	-0.0475591	-0.225622	1	0.999374	1	424	tags=8%, list=14%, signal=9%
ORGANIC CYCLIC COMPOUND METABOLIC PROCESS%GOBP%GO:1901360	ORGANIC CYCLIC COMPOUND METABOLIC PROCESS%GOBP%GO:1901360		243	-0.0448721	-0.214935	1	0.998751	1	424	tags=8%, list=14%, signal=9%
CELLULAR AROMATIC COMPOUND METABOLIC PROCESS%GOBP%GO:0006725	CELLULAR AROMATIC COMPOUND METABOLIC PROCESS%GOBP%GO:0006725		213	-0.0333665	-0.159529	1	0.998127	1	217	tags=4%, list=7%, signal=4%
